# Supplementary material for: End game strategies towards the total synthesis of vibsanin E, 3-hydroxyvibsanin E, furanovibsanin A, and 3-O-methylfuranovibsanin A
Source: publisher site journal article supplement (doi:10.3762/bjoc.4.34), 2008-10-08

**End game strategies towards the total synthesis of vibsantin E, 3-hydroxyvibsantin E, furanovibsantin A,  
and 3-*O*-methylfuranovibsantin A**

Brett D. Schwartz, Craig M. Williams\* and Paul V. Bernhardt

Address: School of Molecular and Microbial Sciences, University of Queensland, Brisbane, 4072, Queensland, Australia

Email: Craig M. Williams\* - c.williams3@uq.edu.au

\* Corresponding author

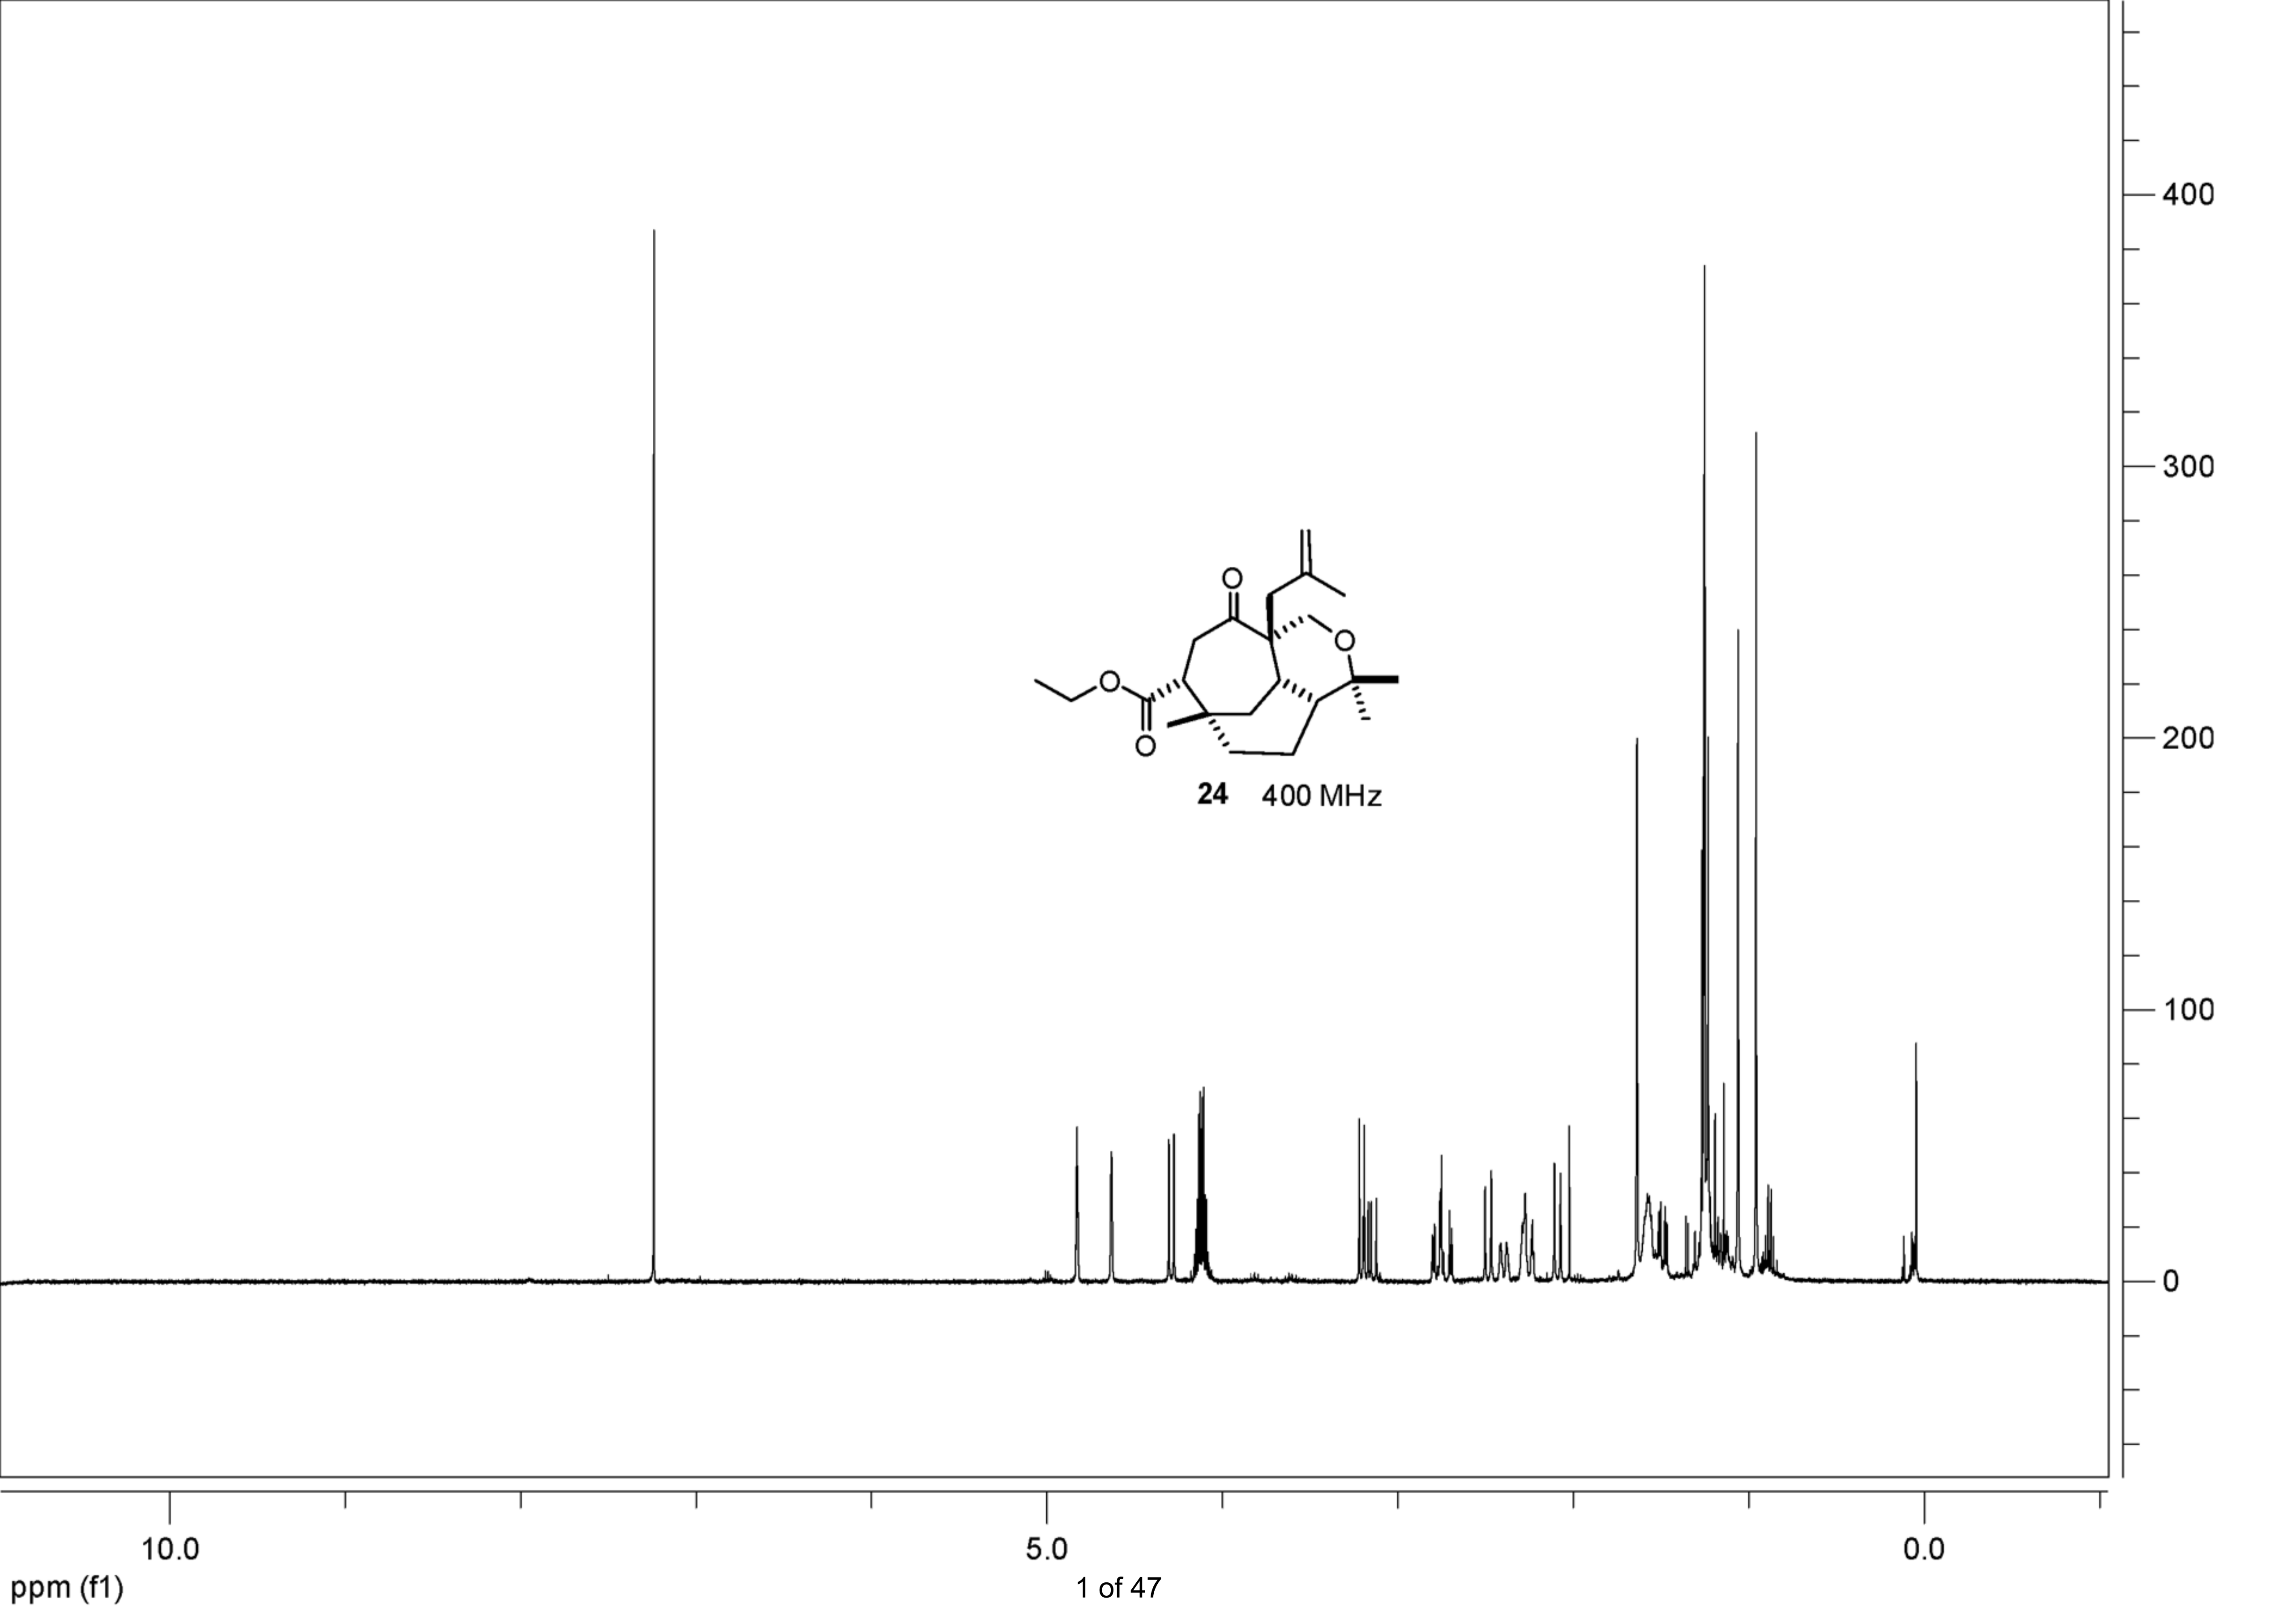

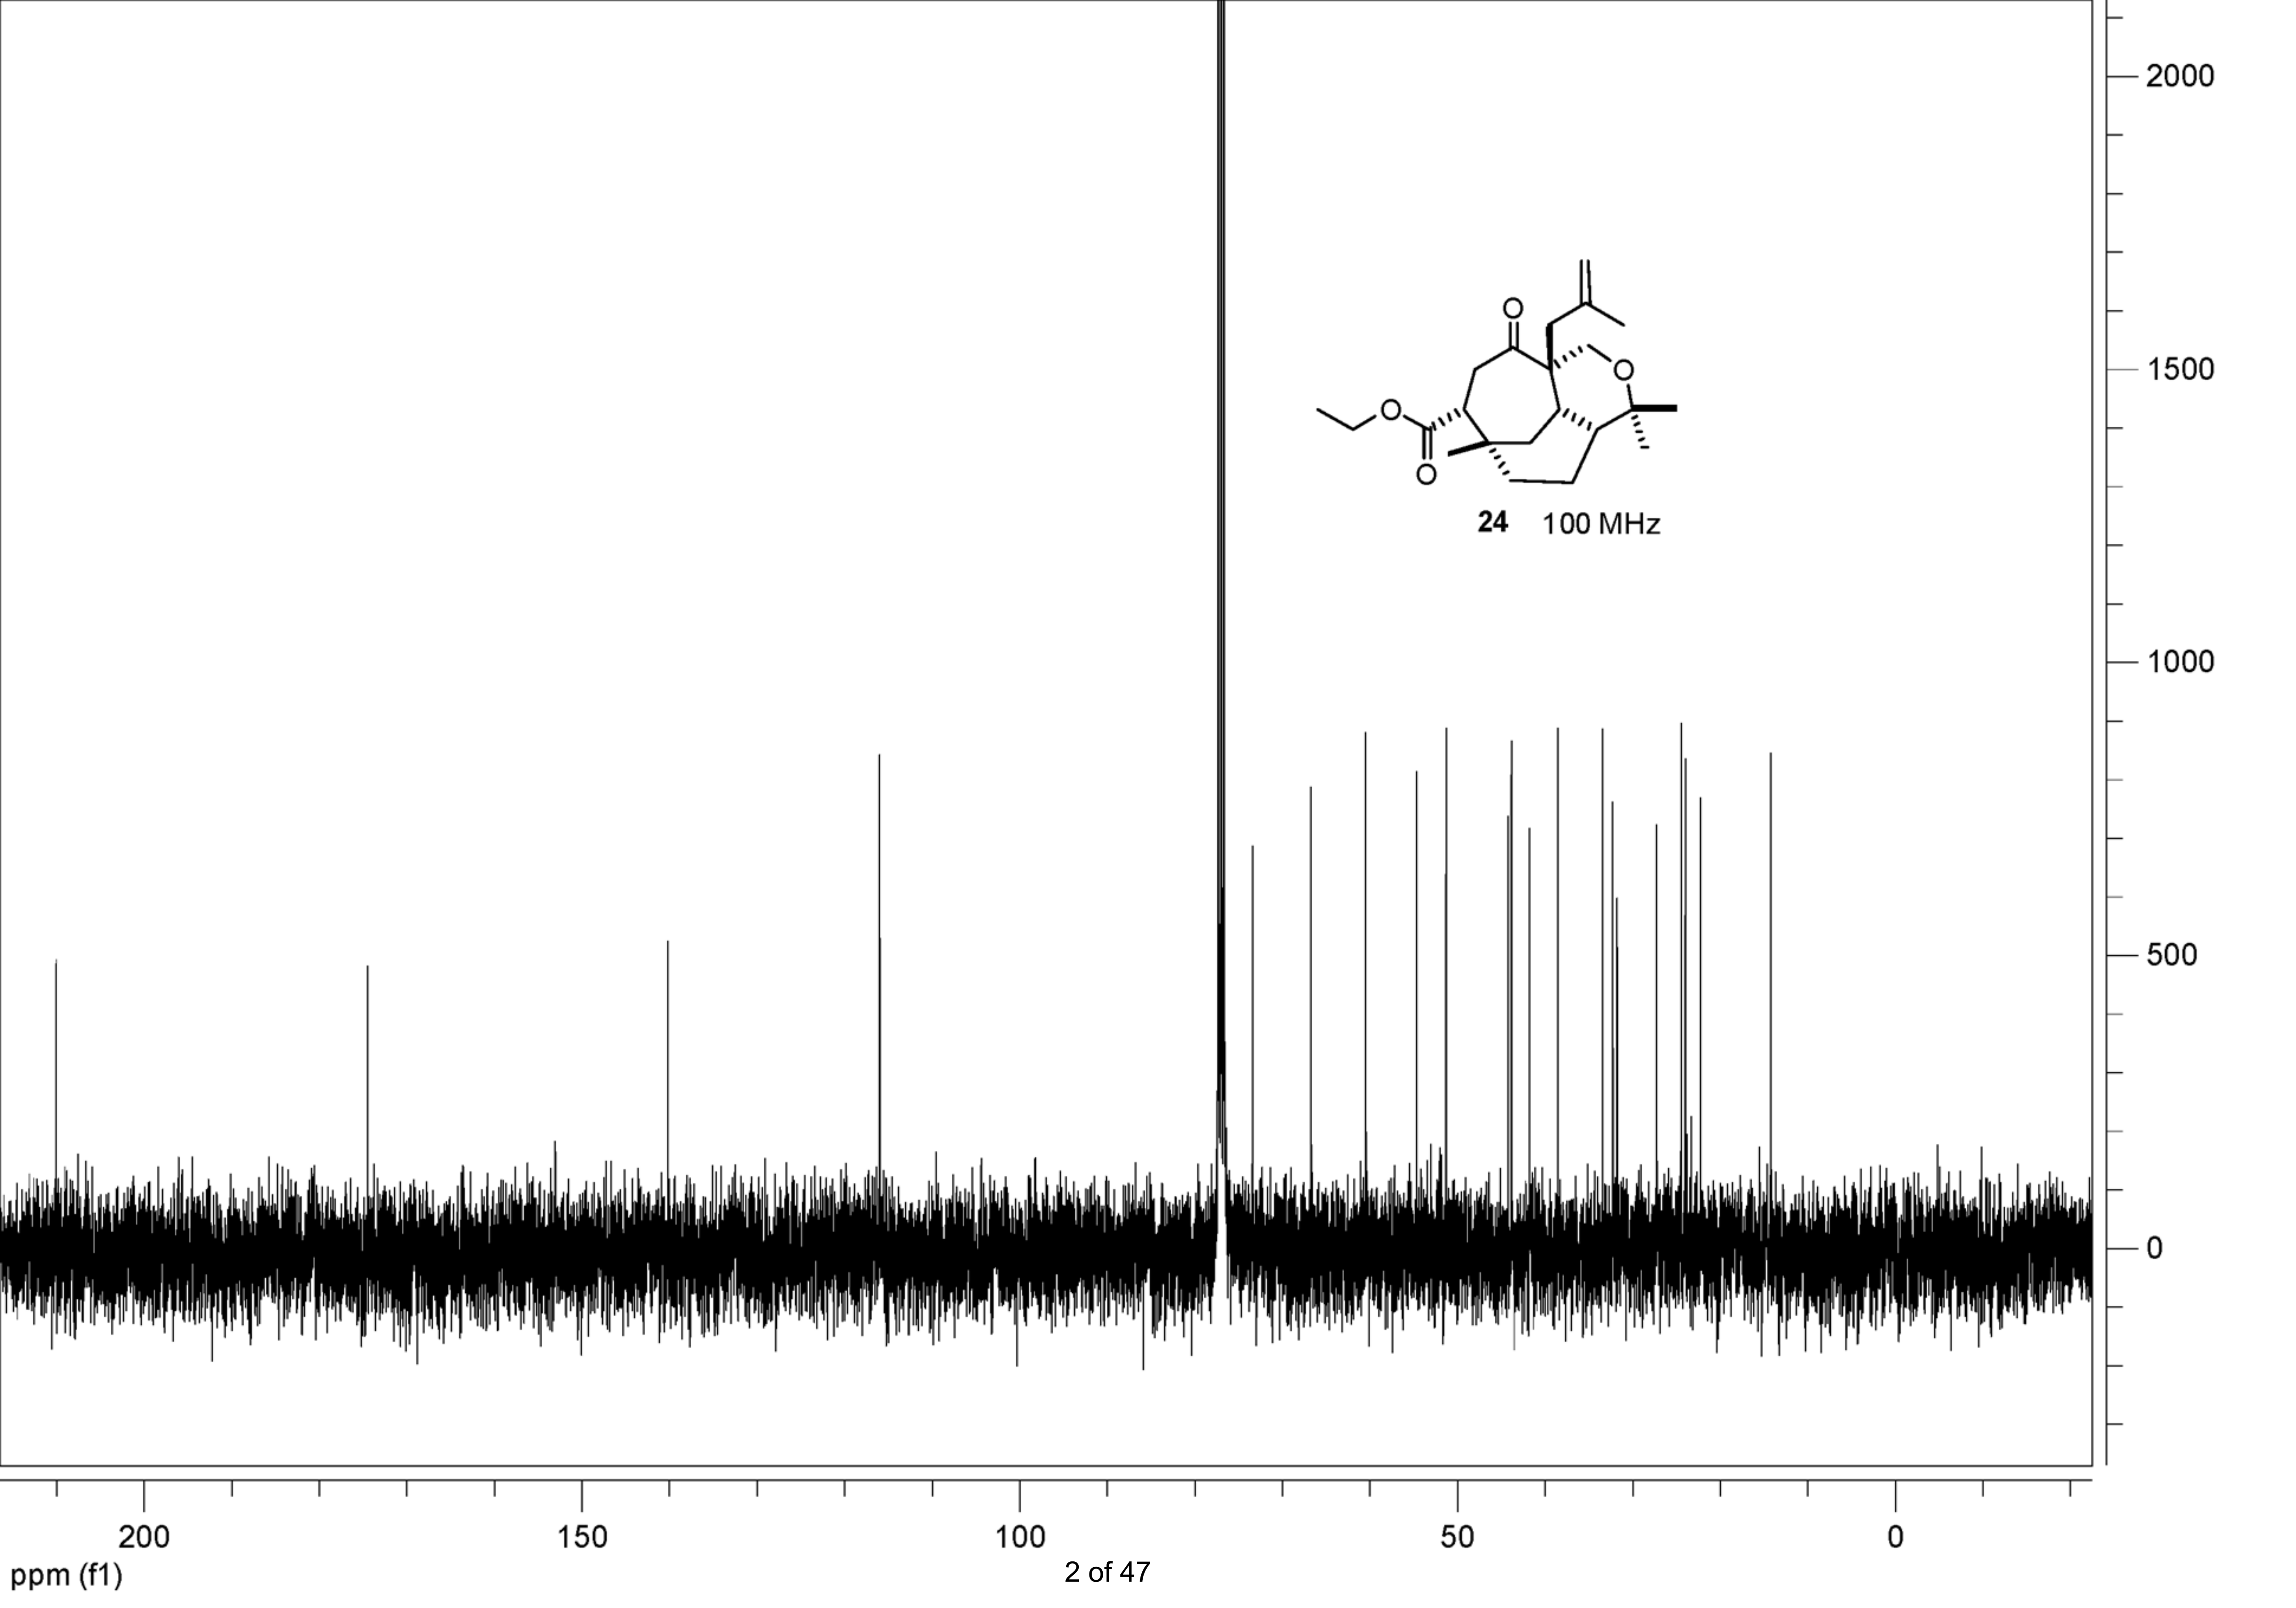

200

150

100

50

0

ppm (f1)

2 of 47

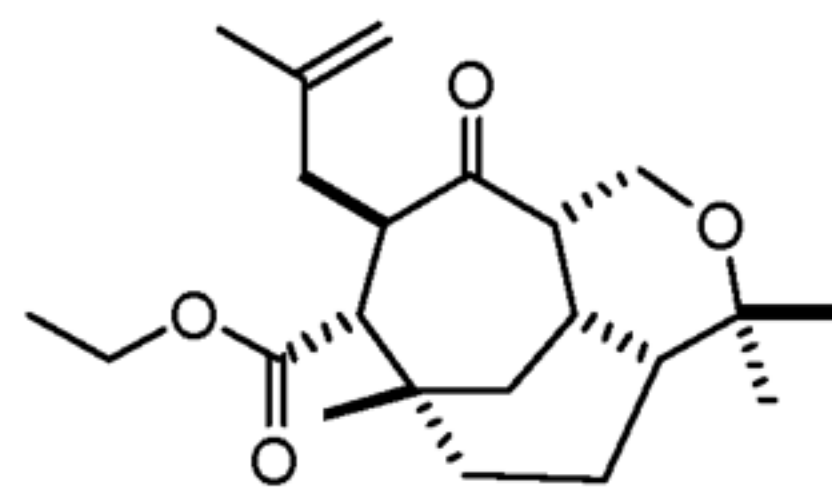

25 400 MHz

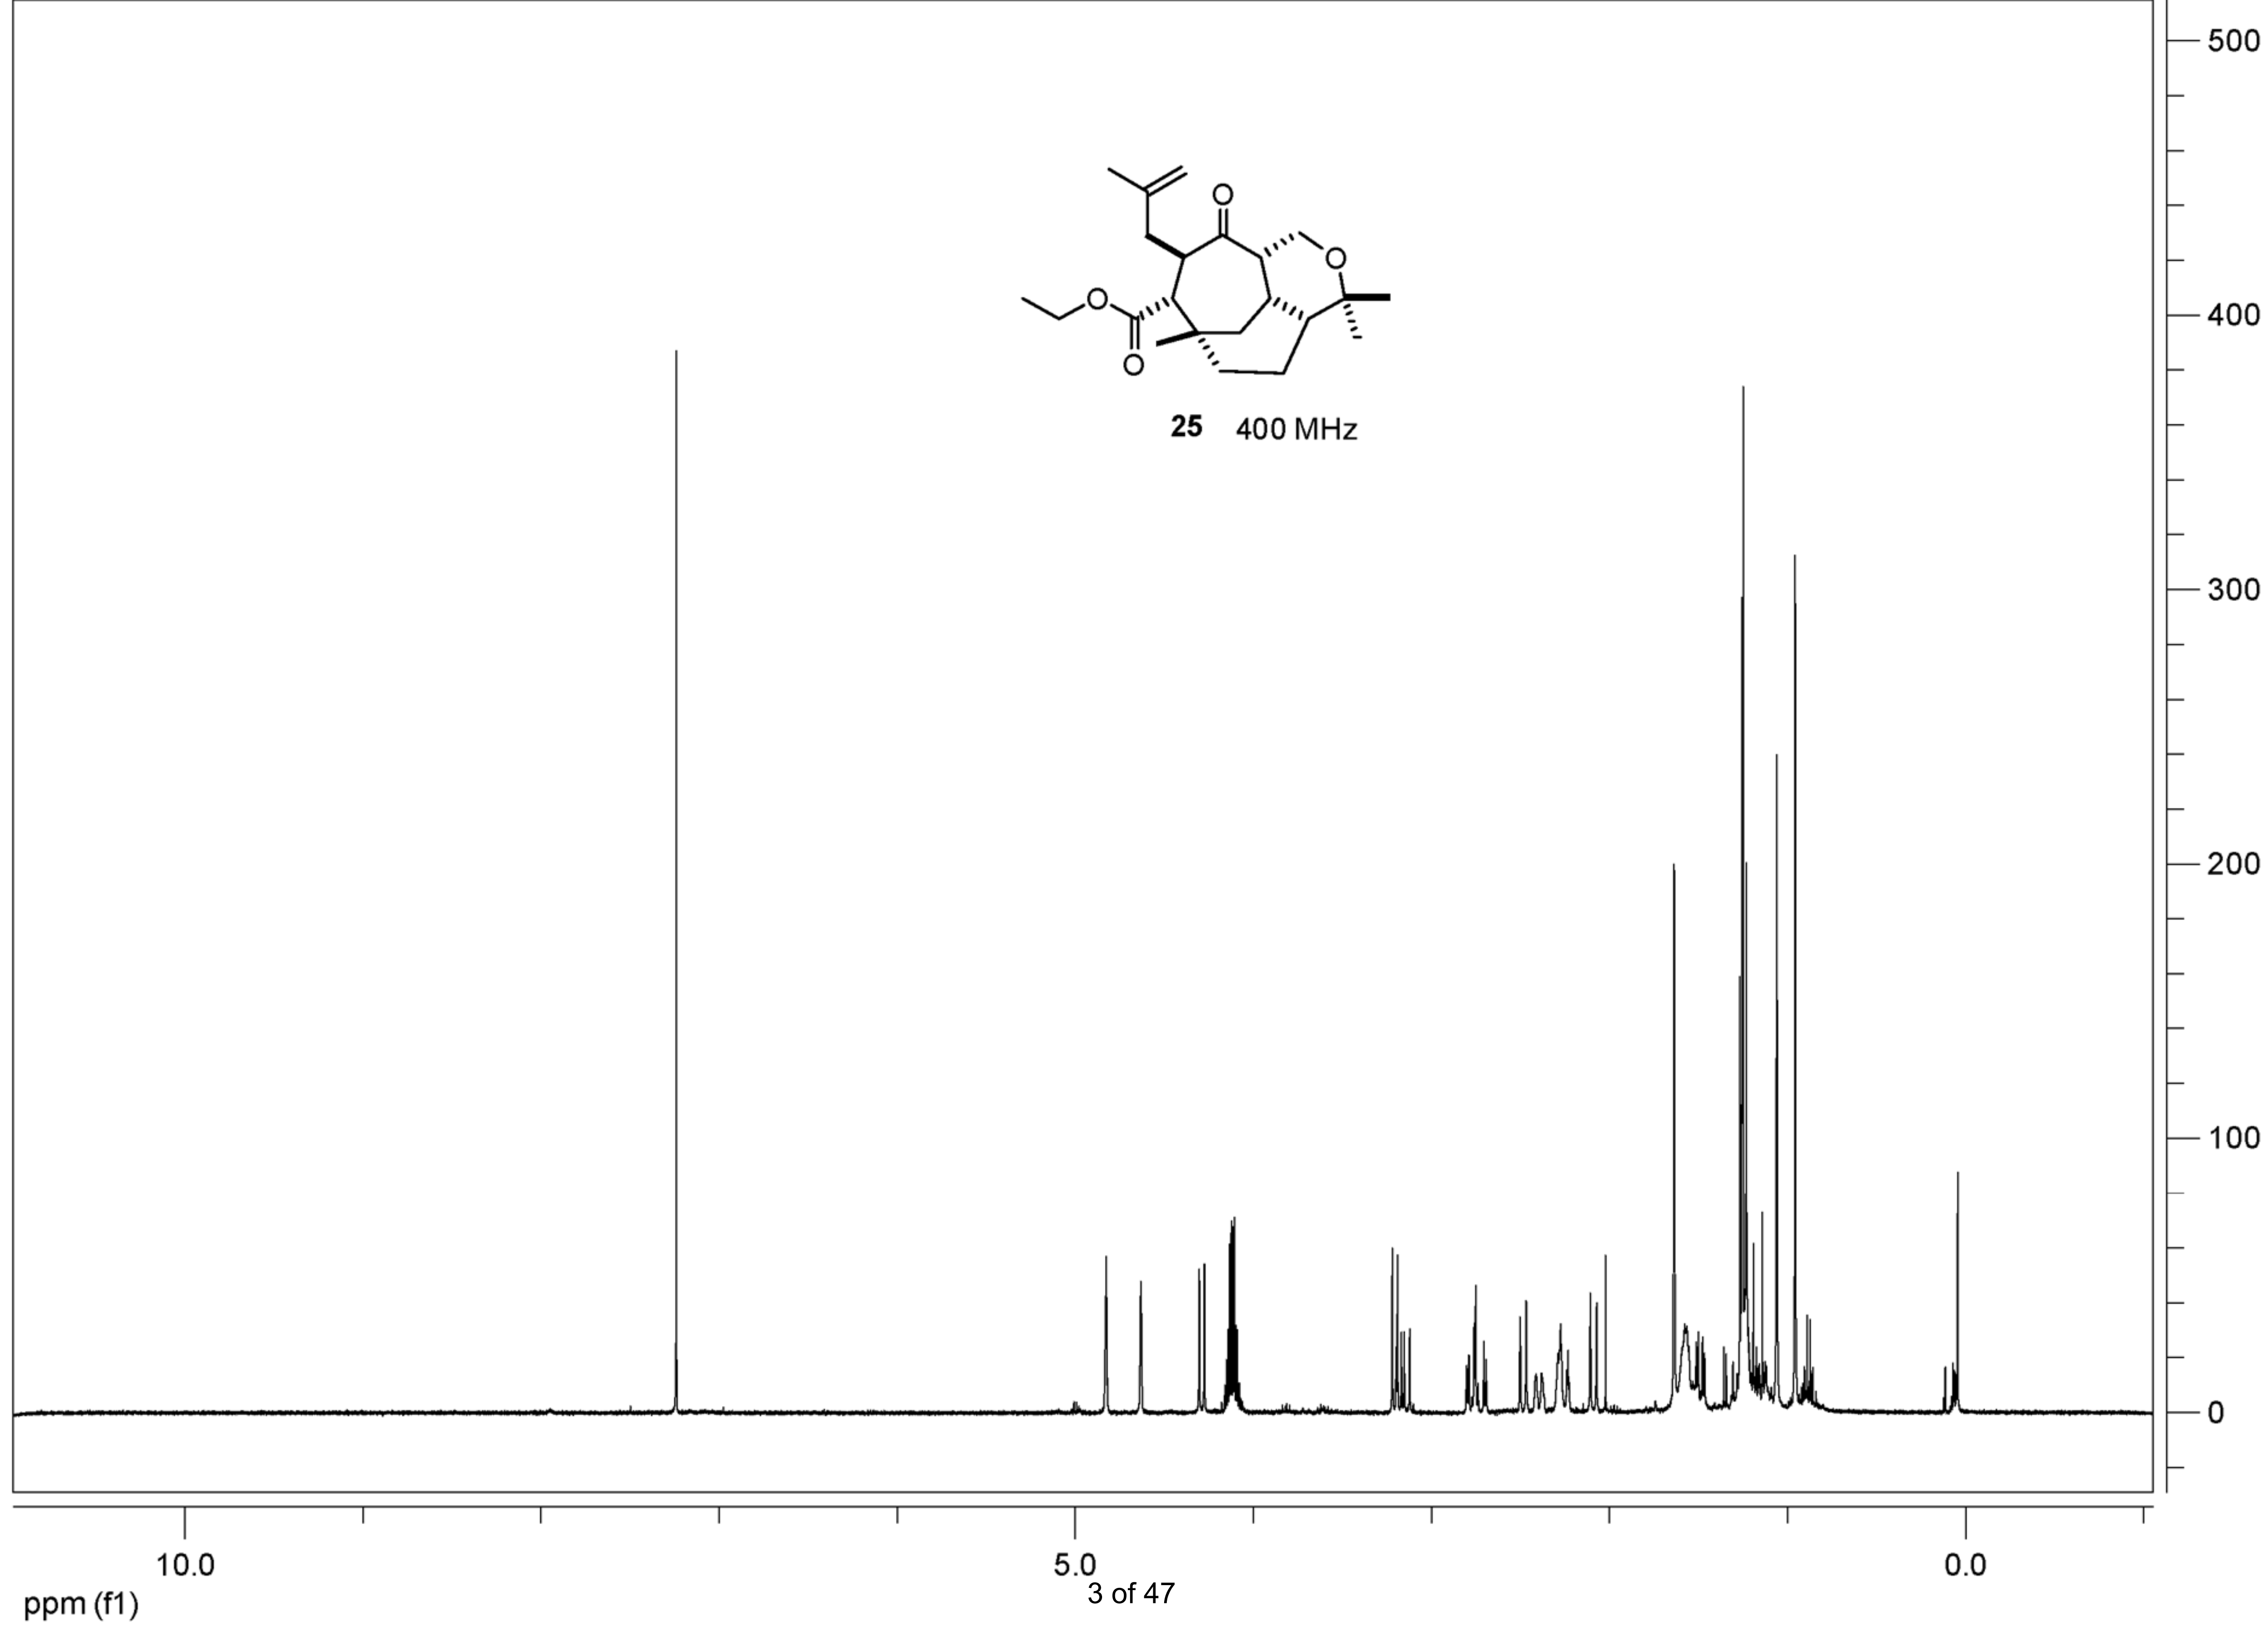

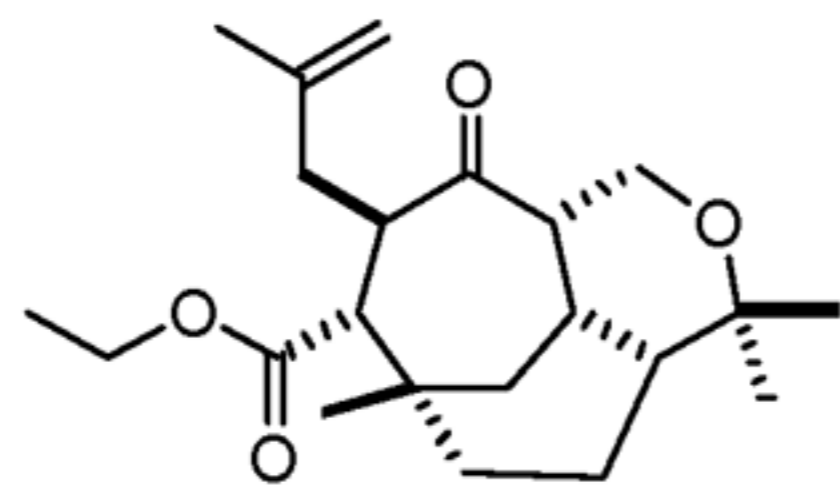

25 100 MHz

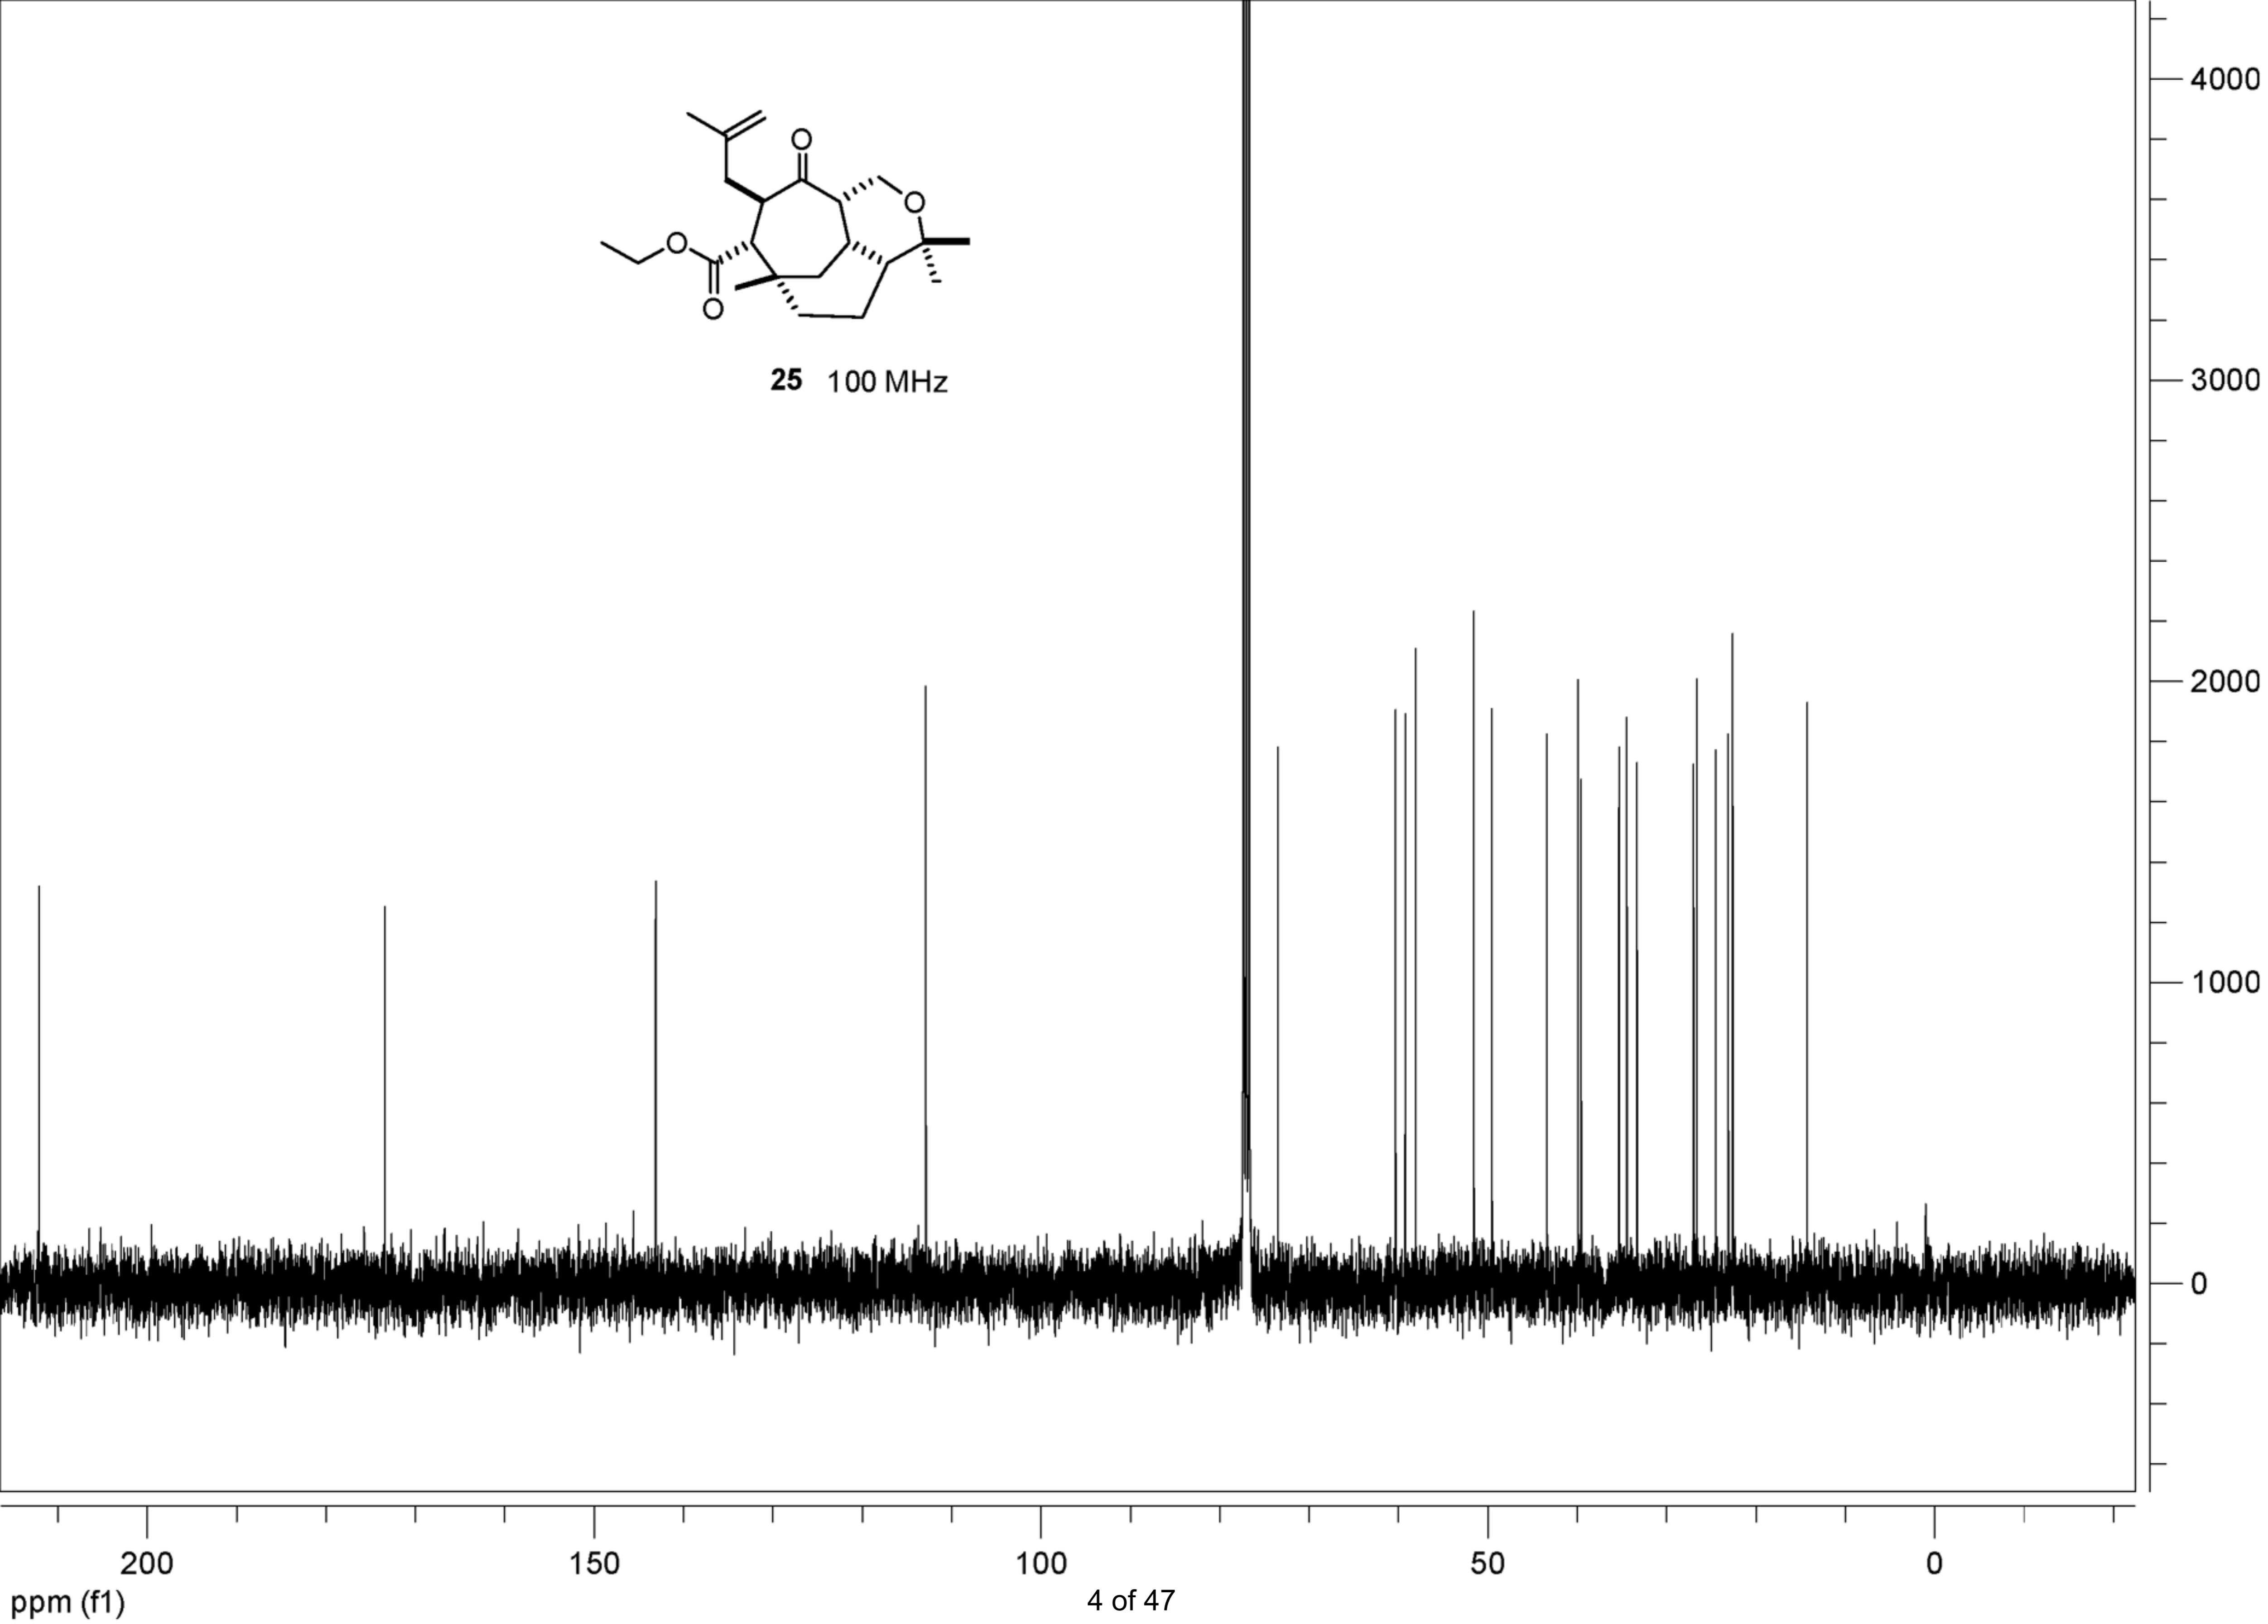

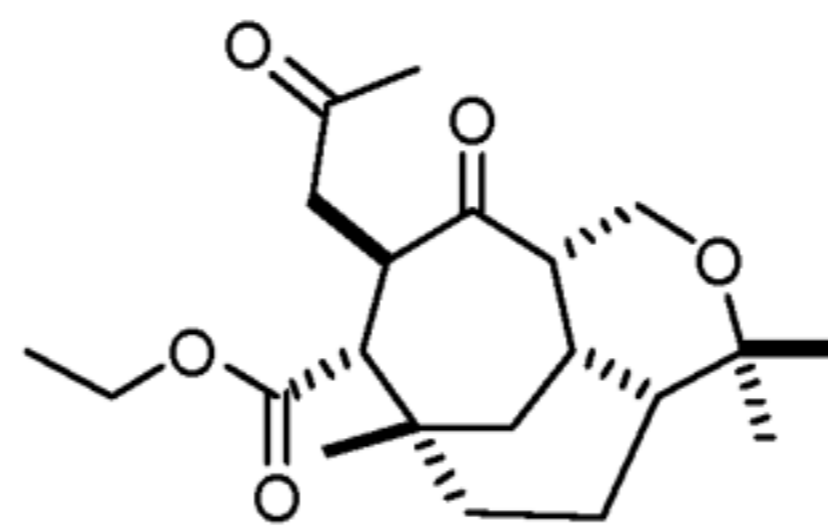

26 400 MHz

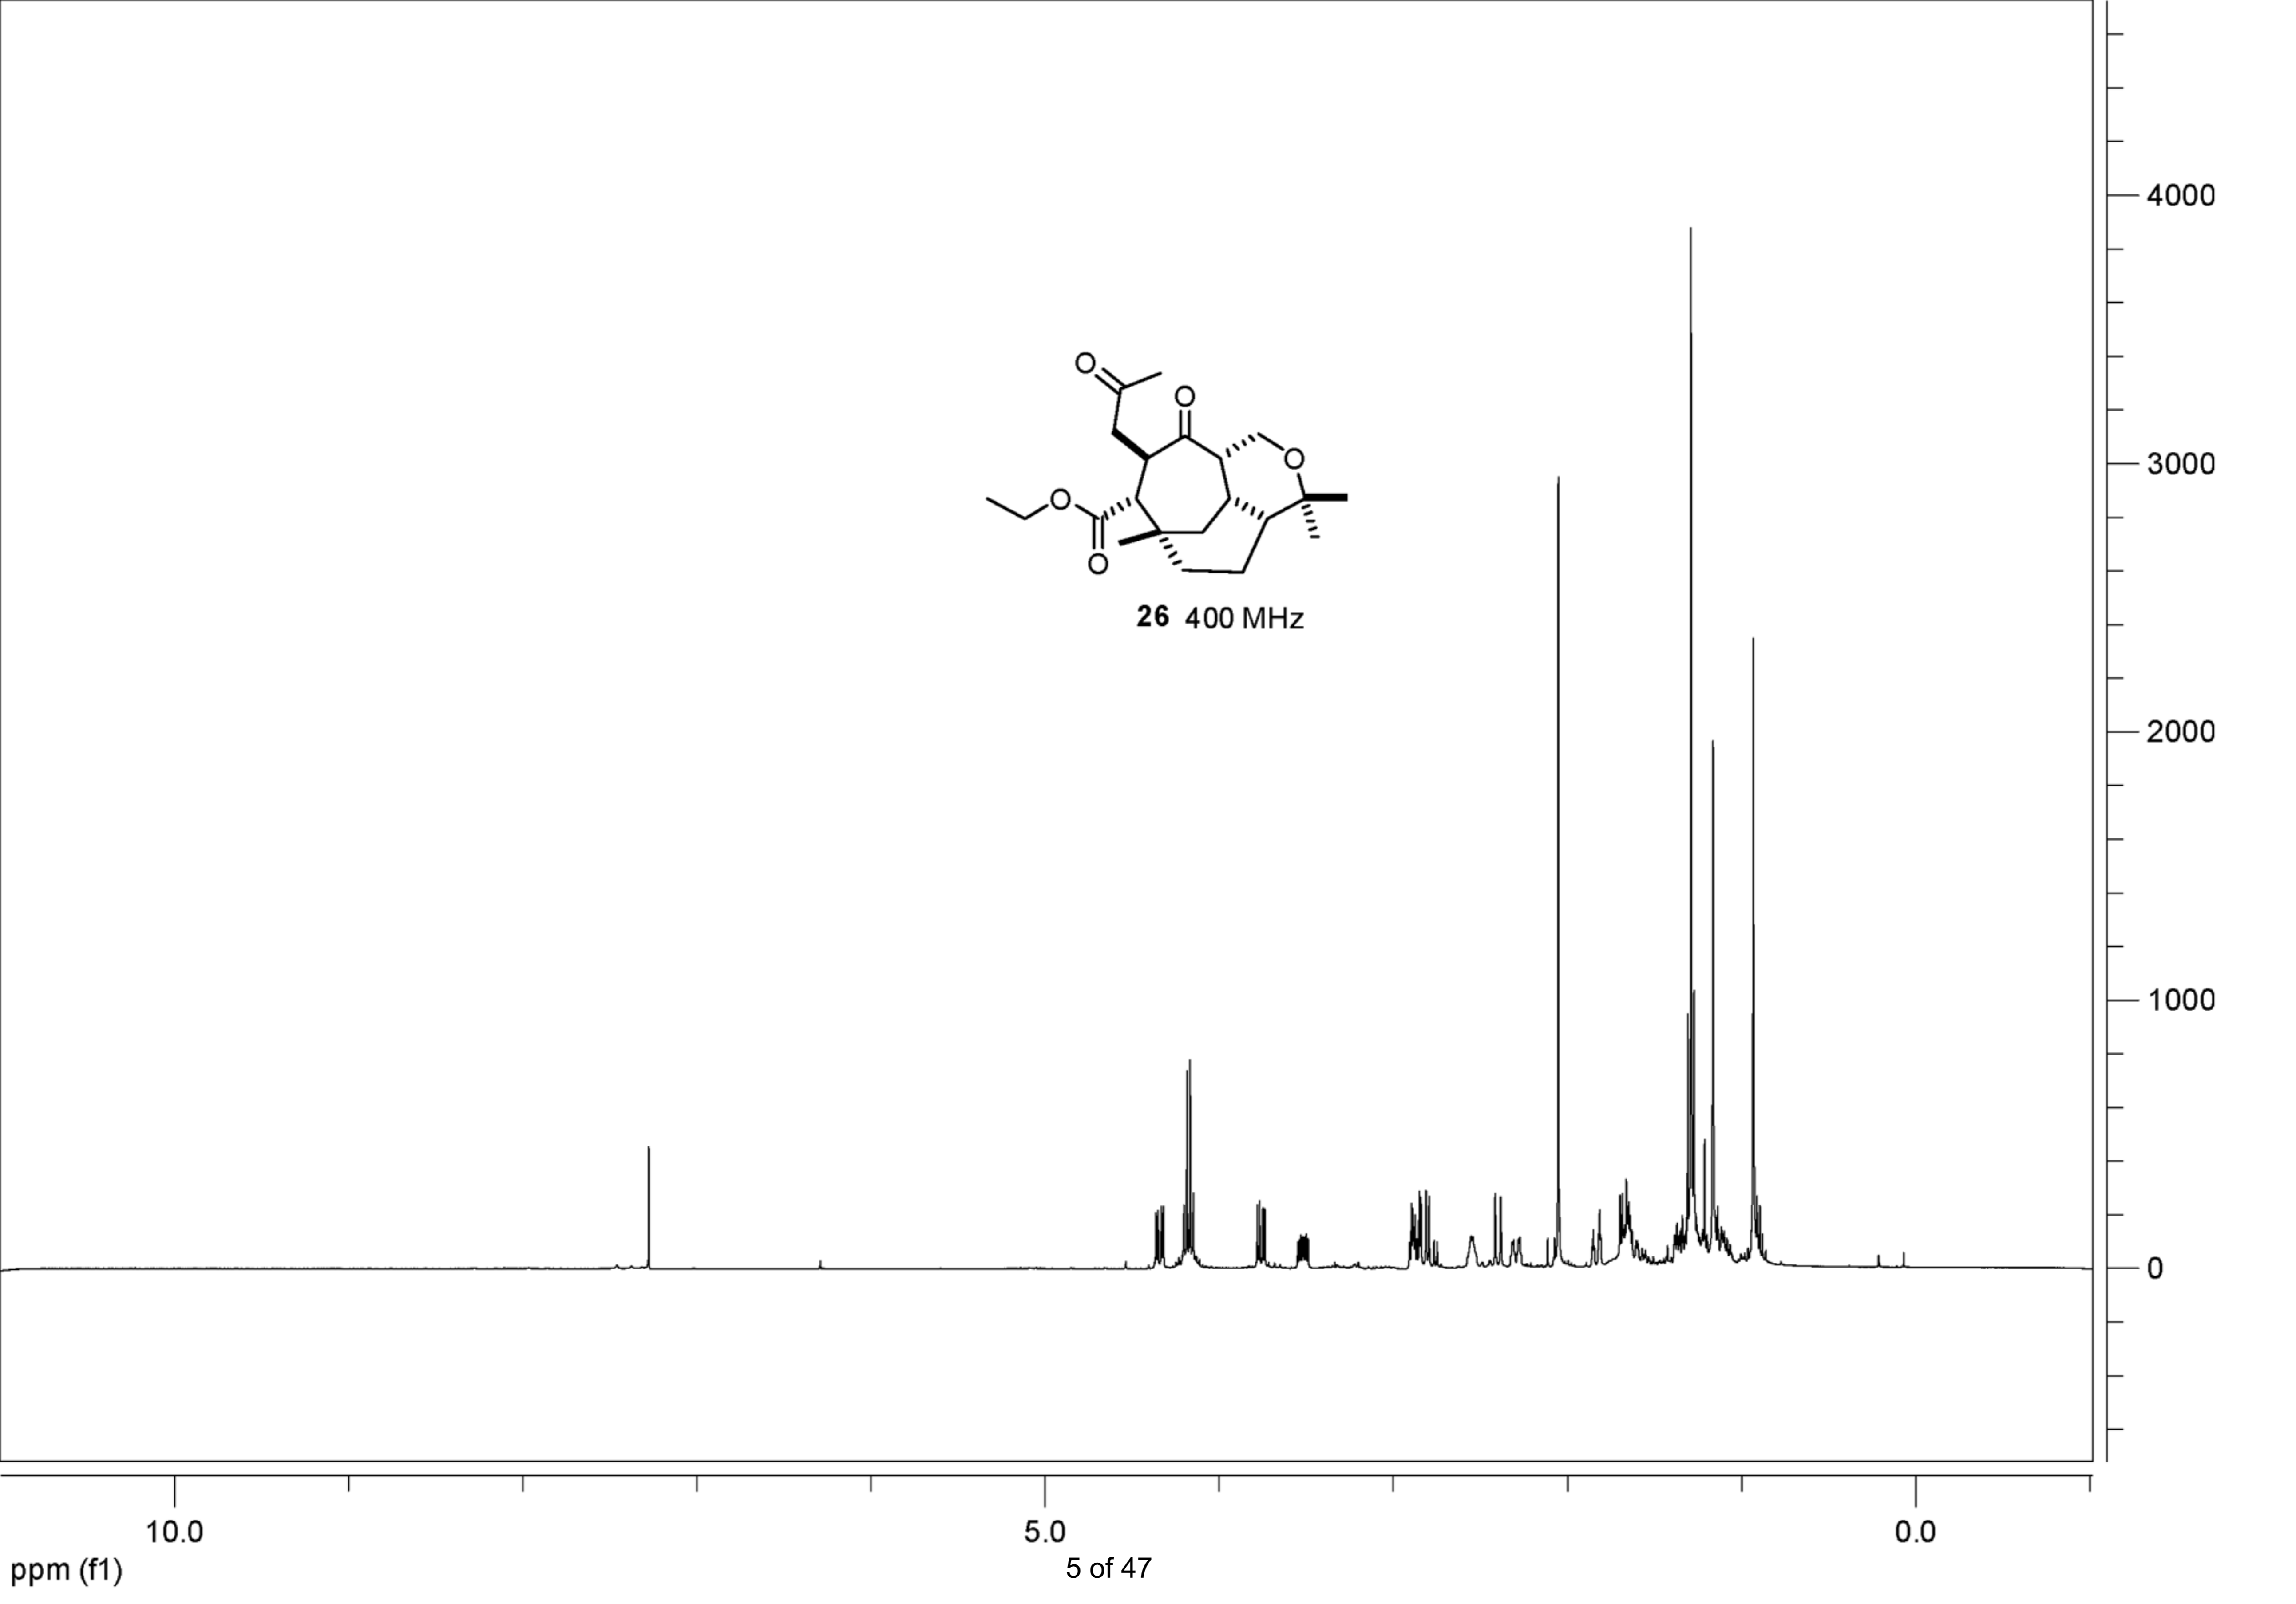

10.0

5.0

0.0

ppm (f1)

5 of 47

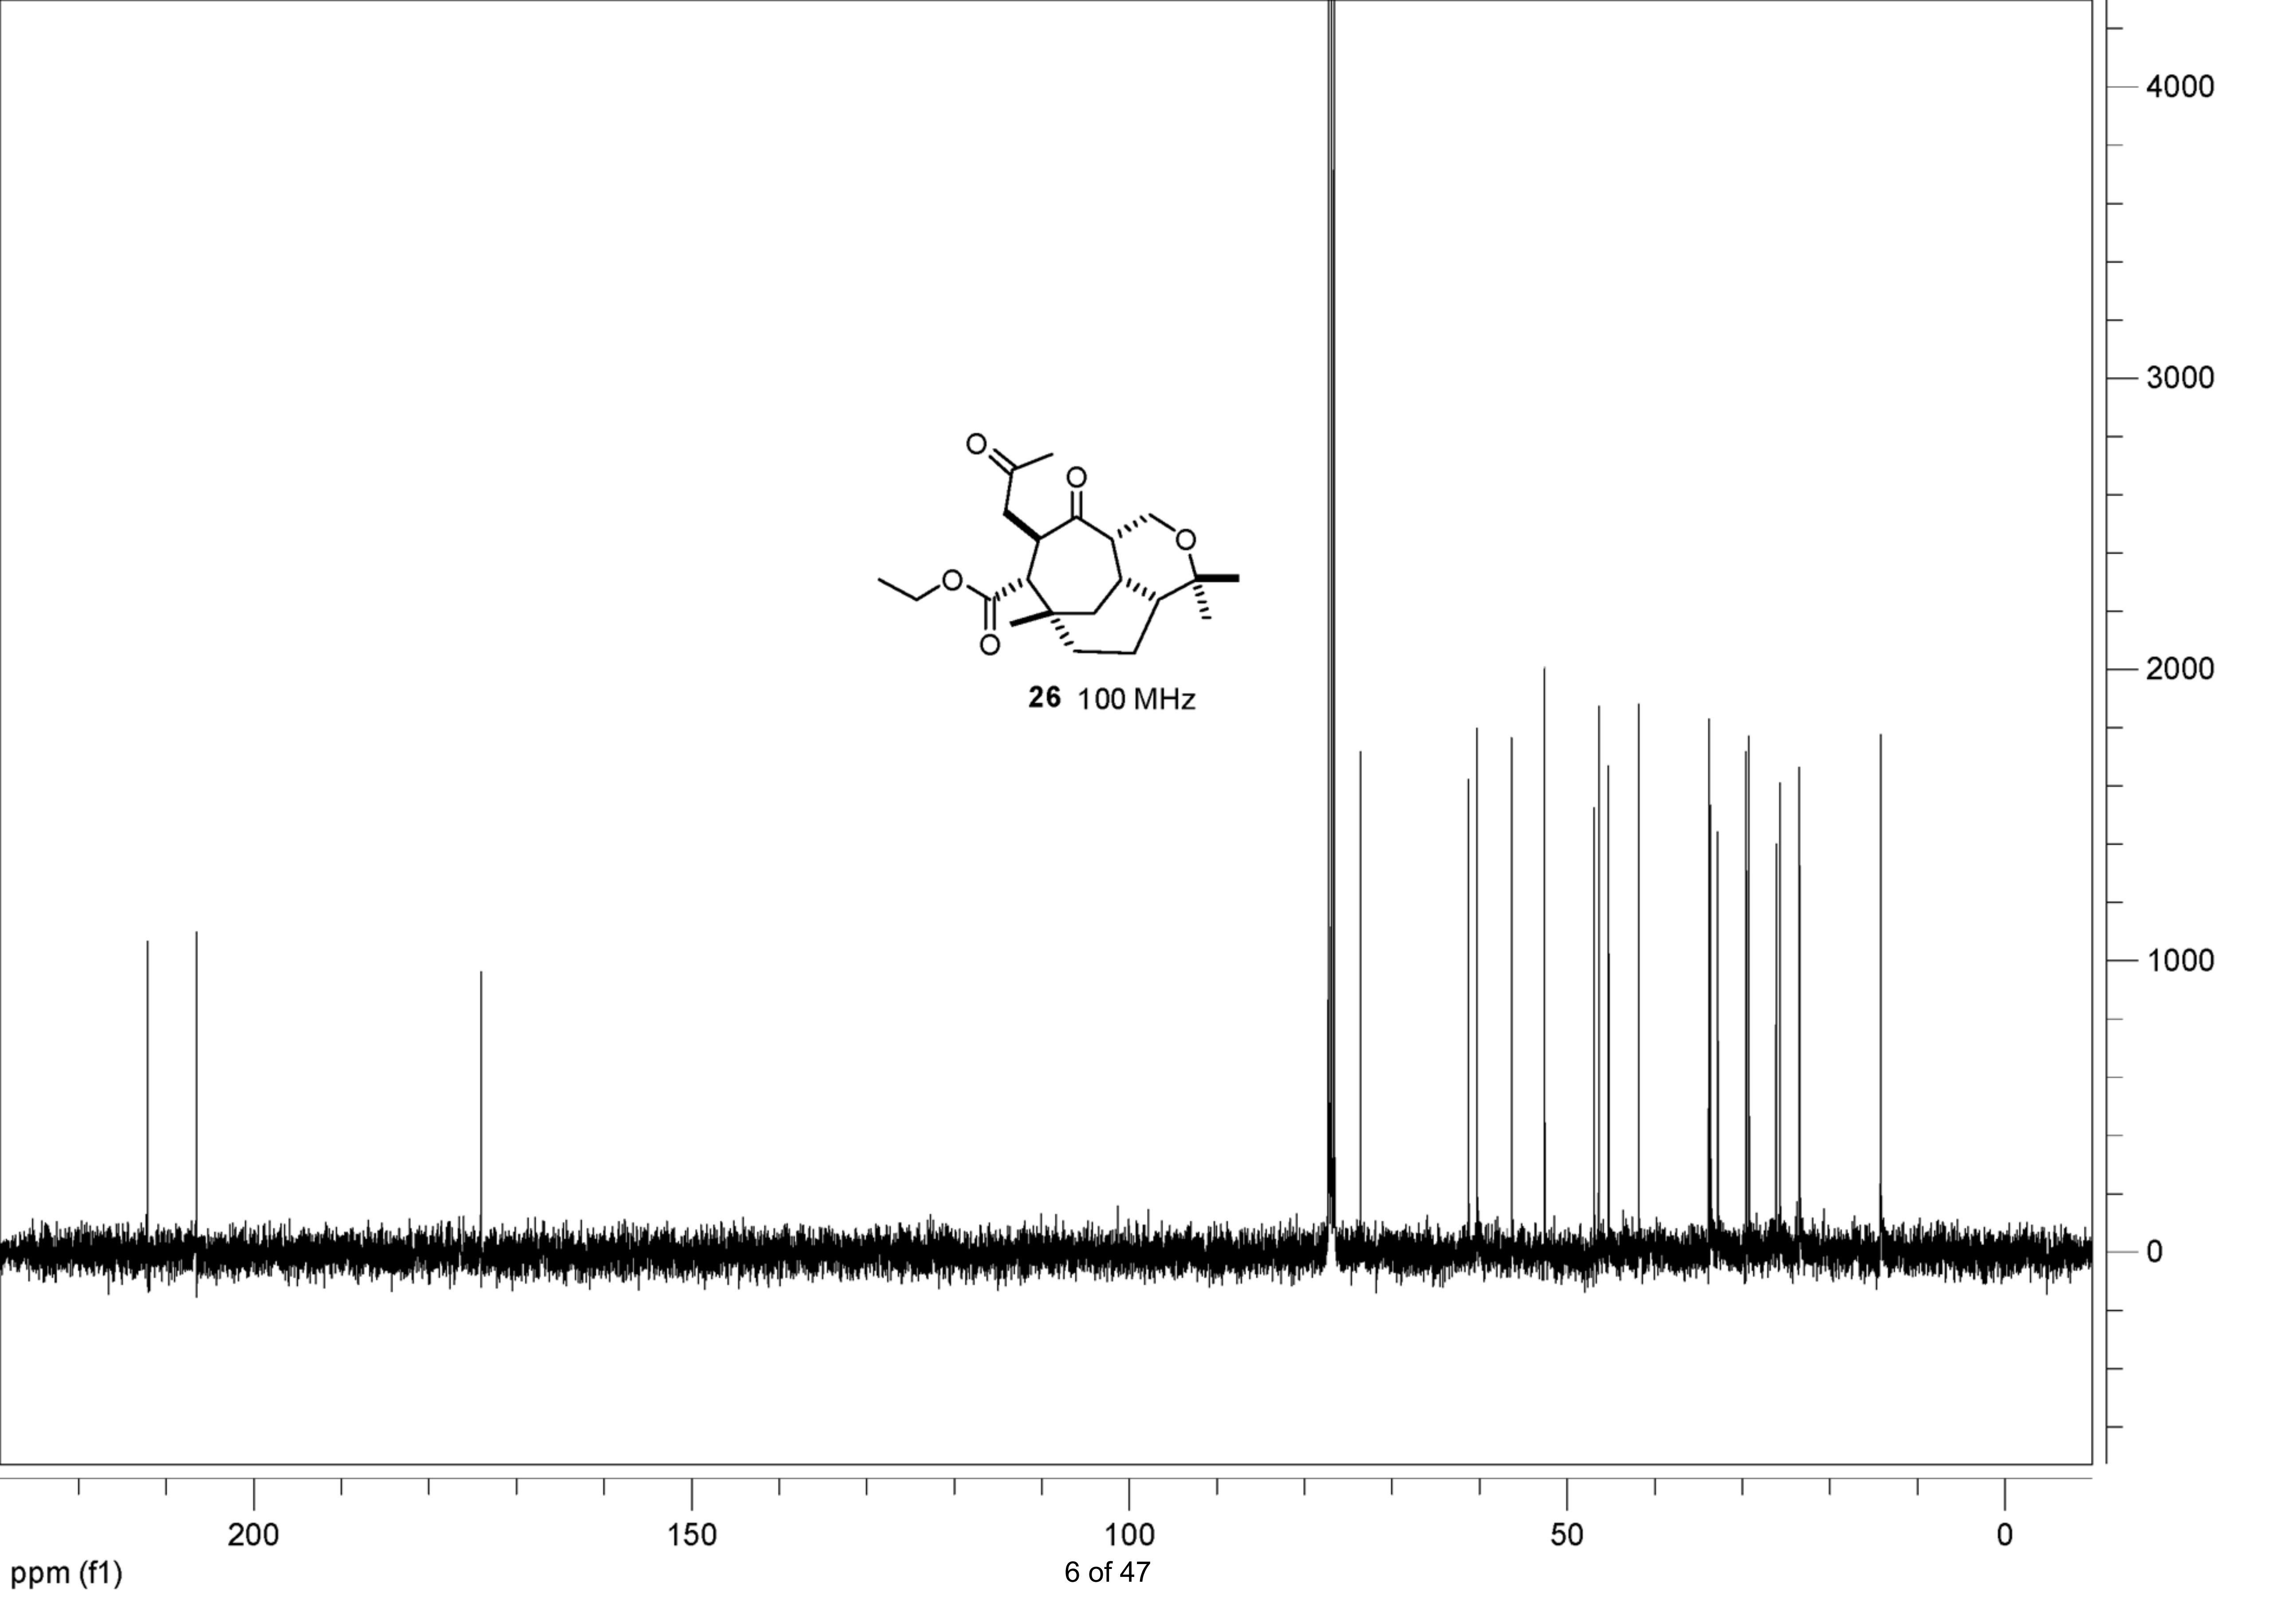

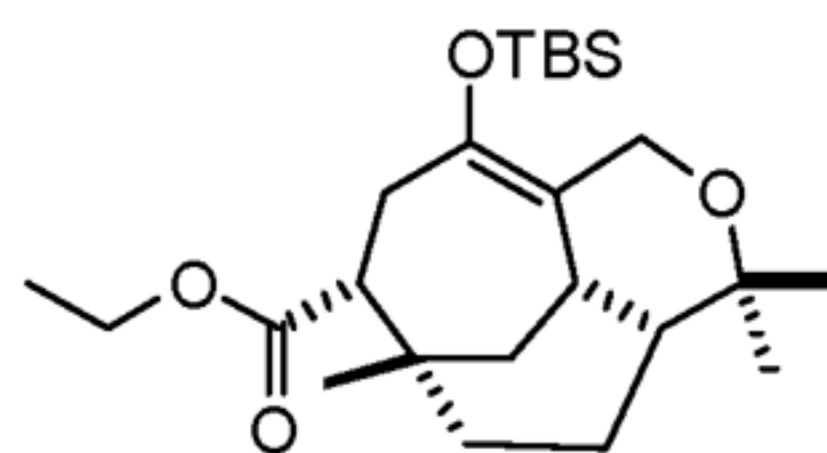

27 400 MHz

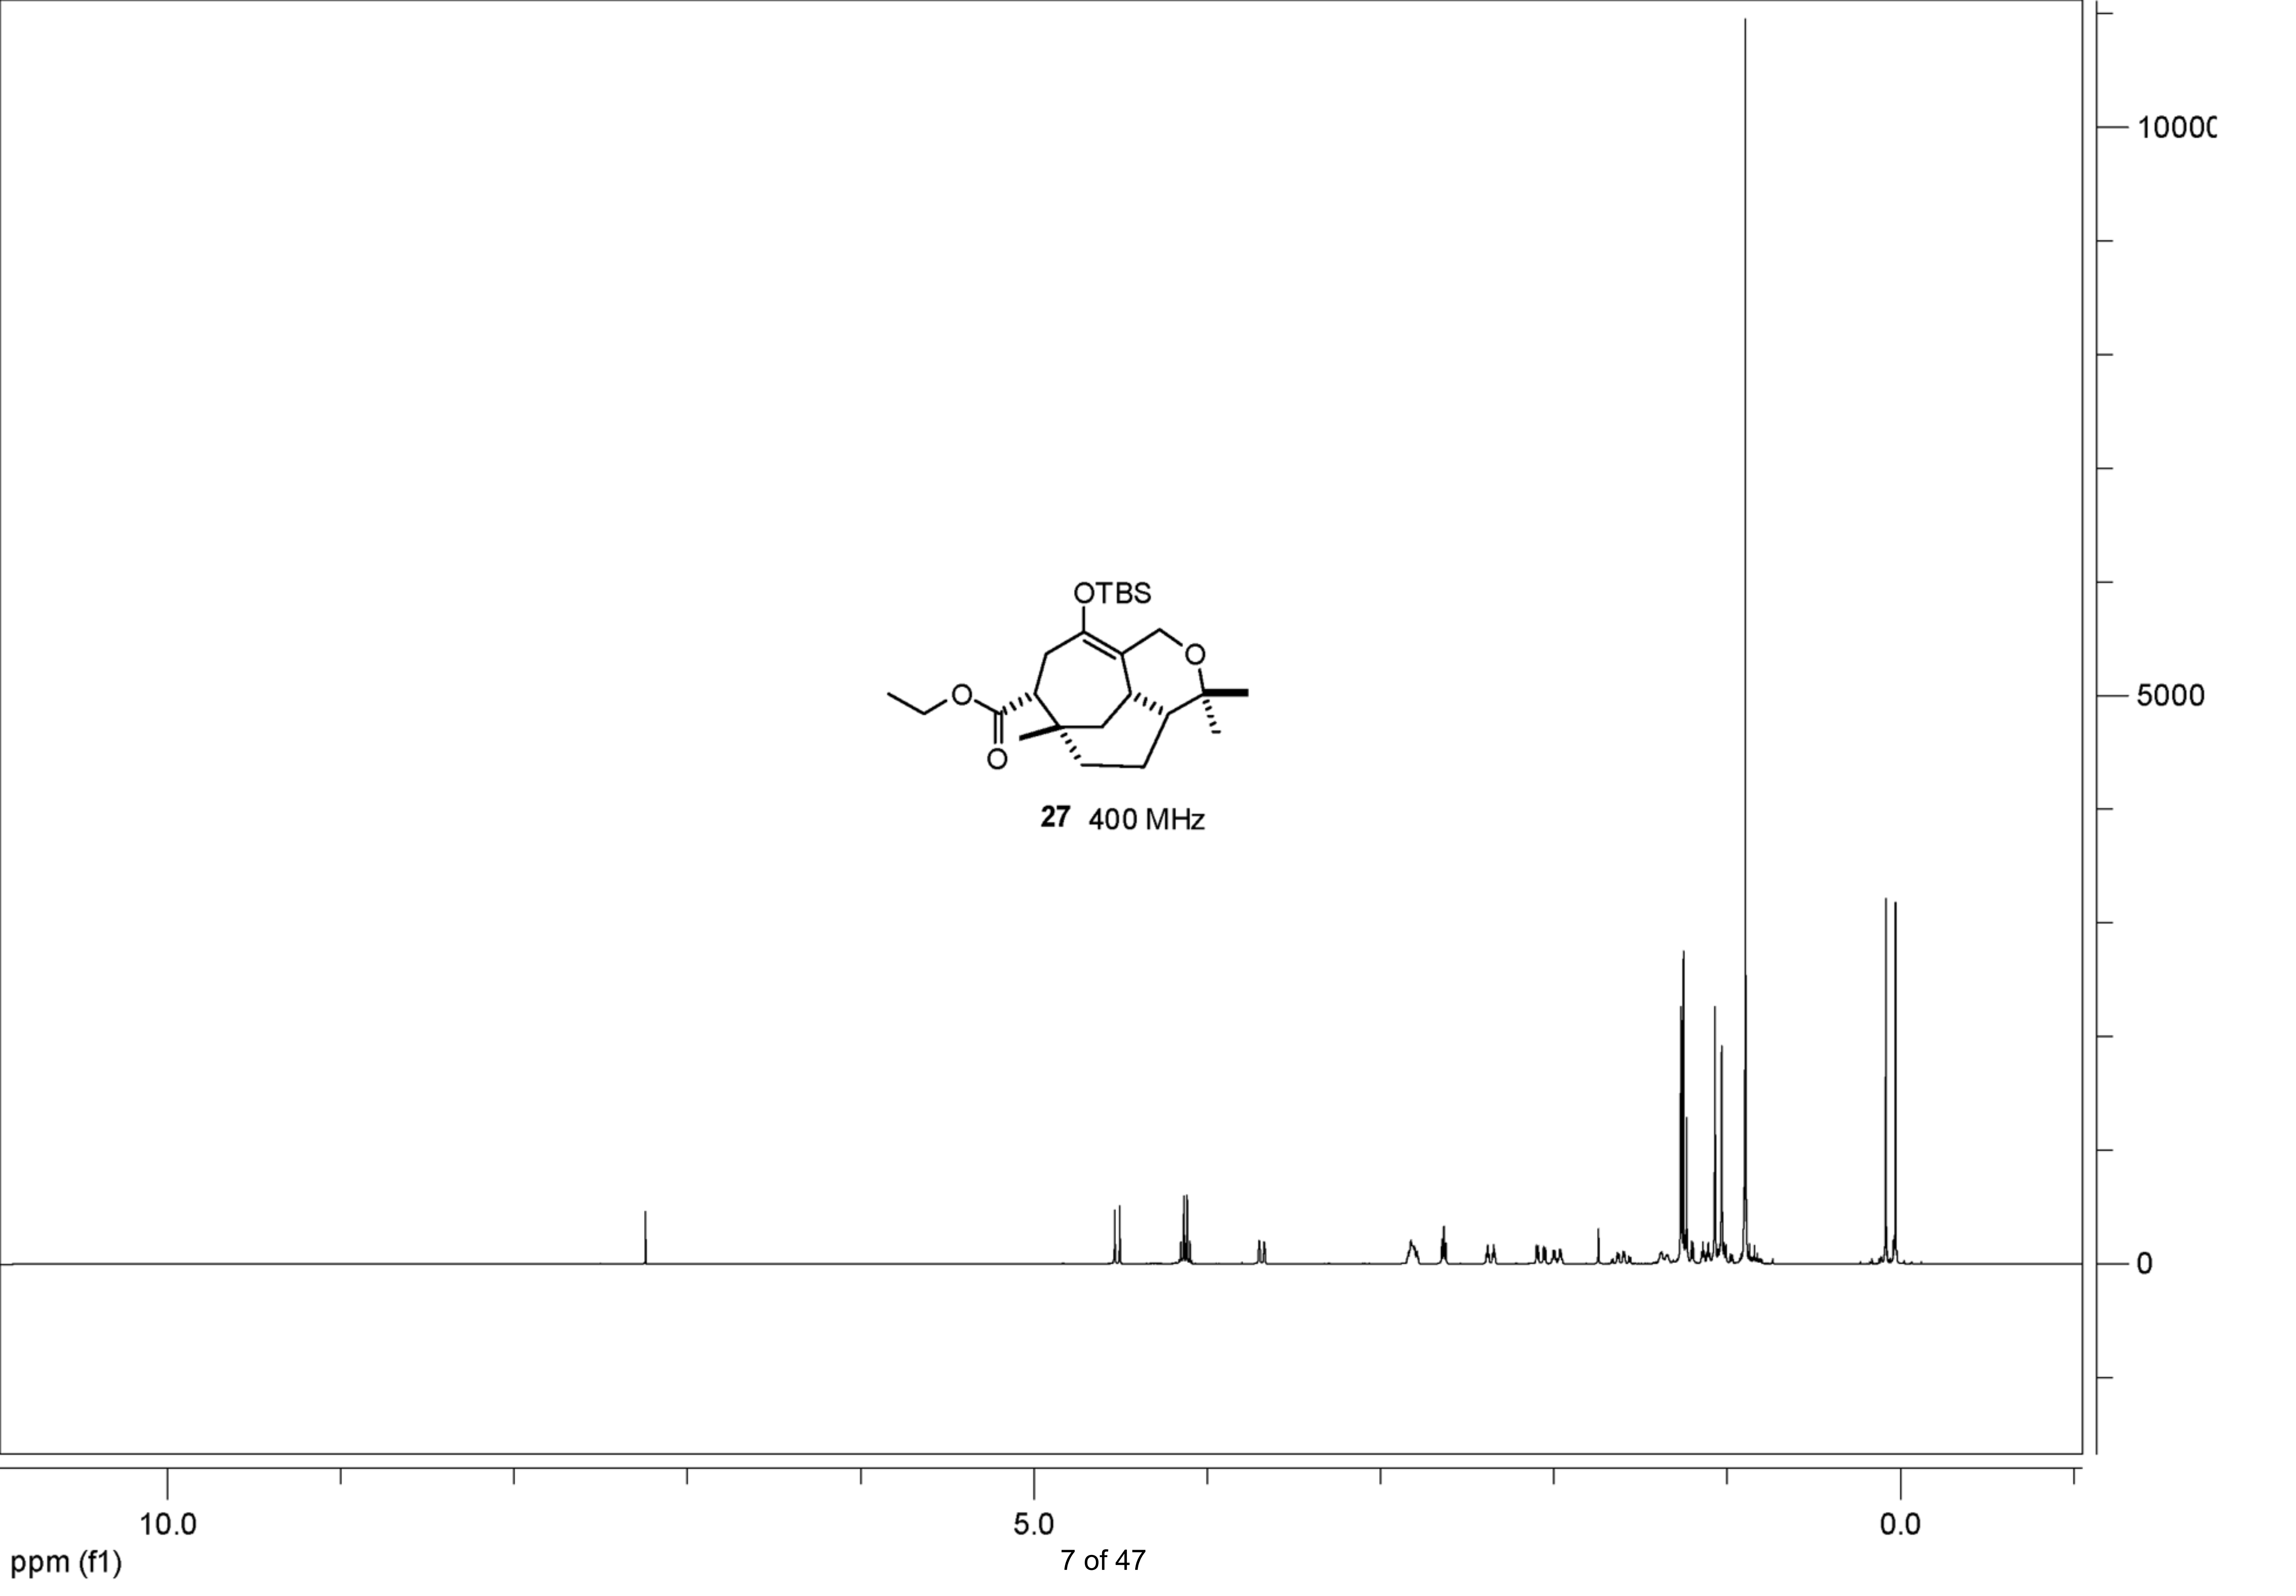

ppm (f1)



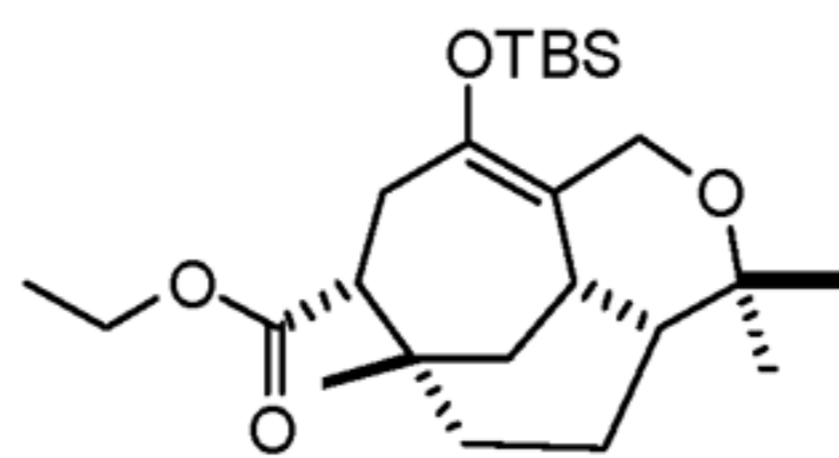

27 100 MHz

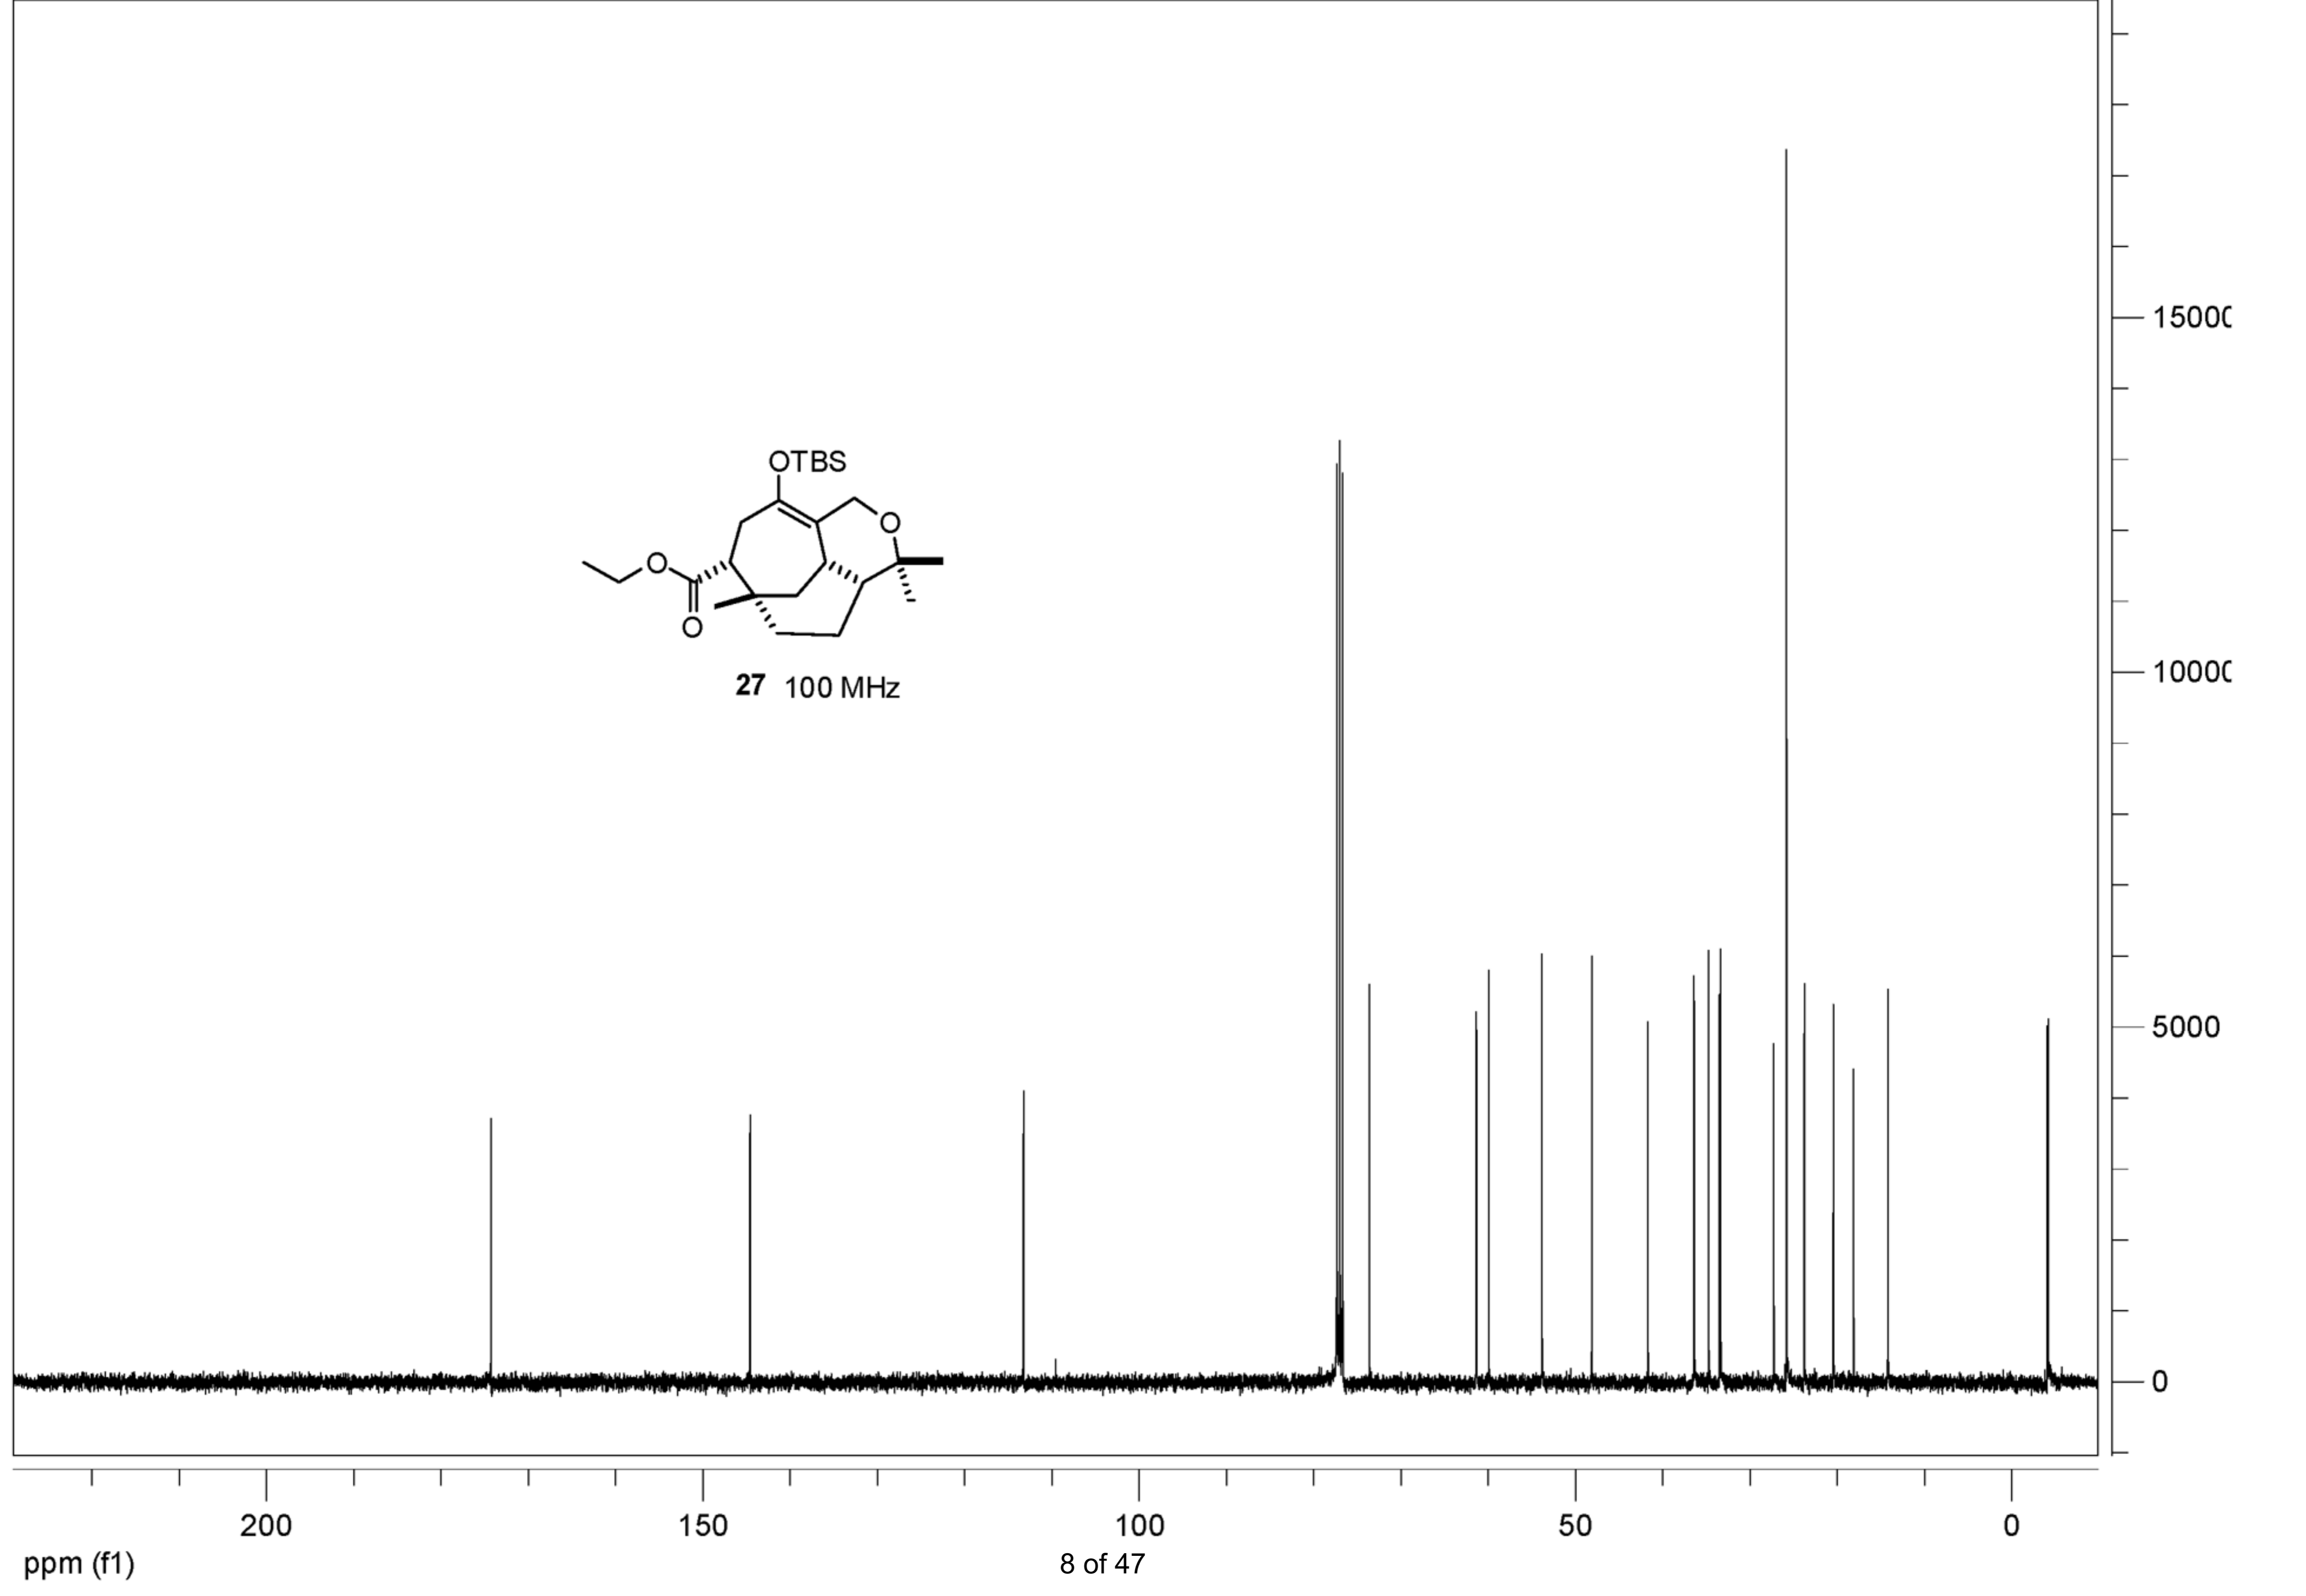

200

150

100

50

0

ppm (f1)

8 of 47

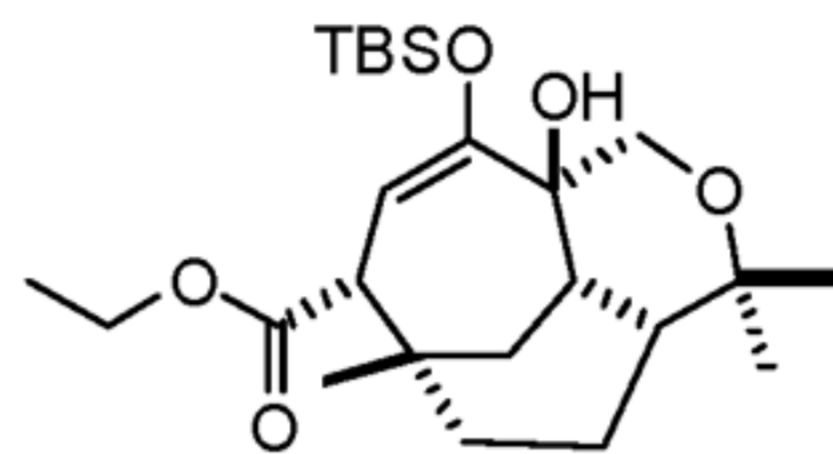

28 400 MHz

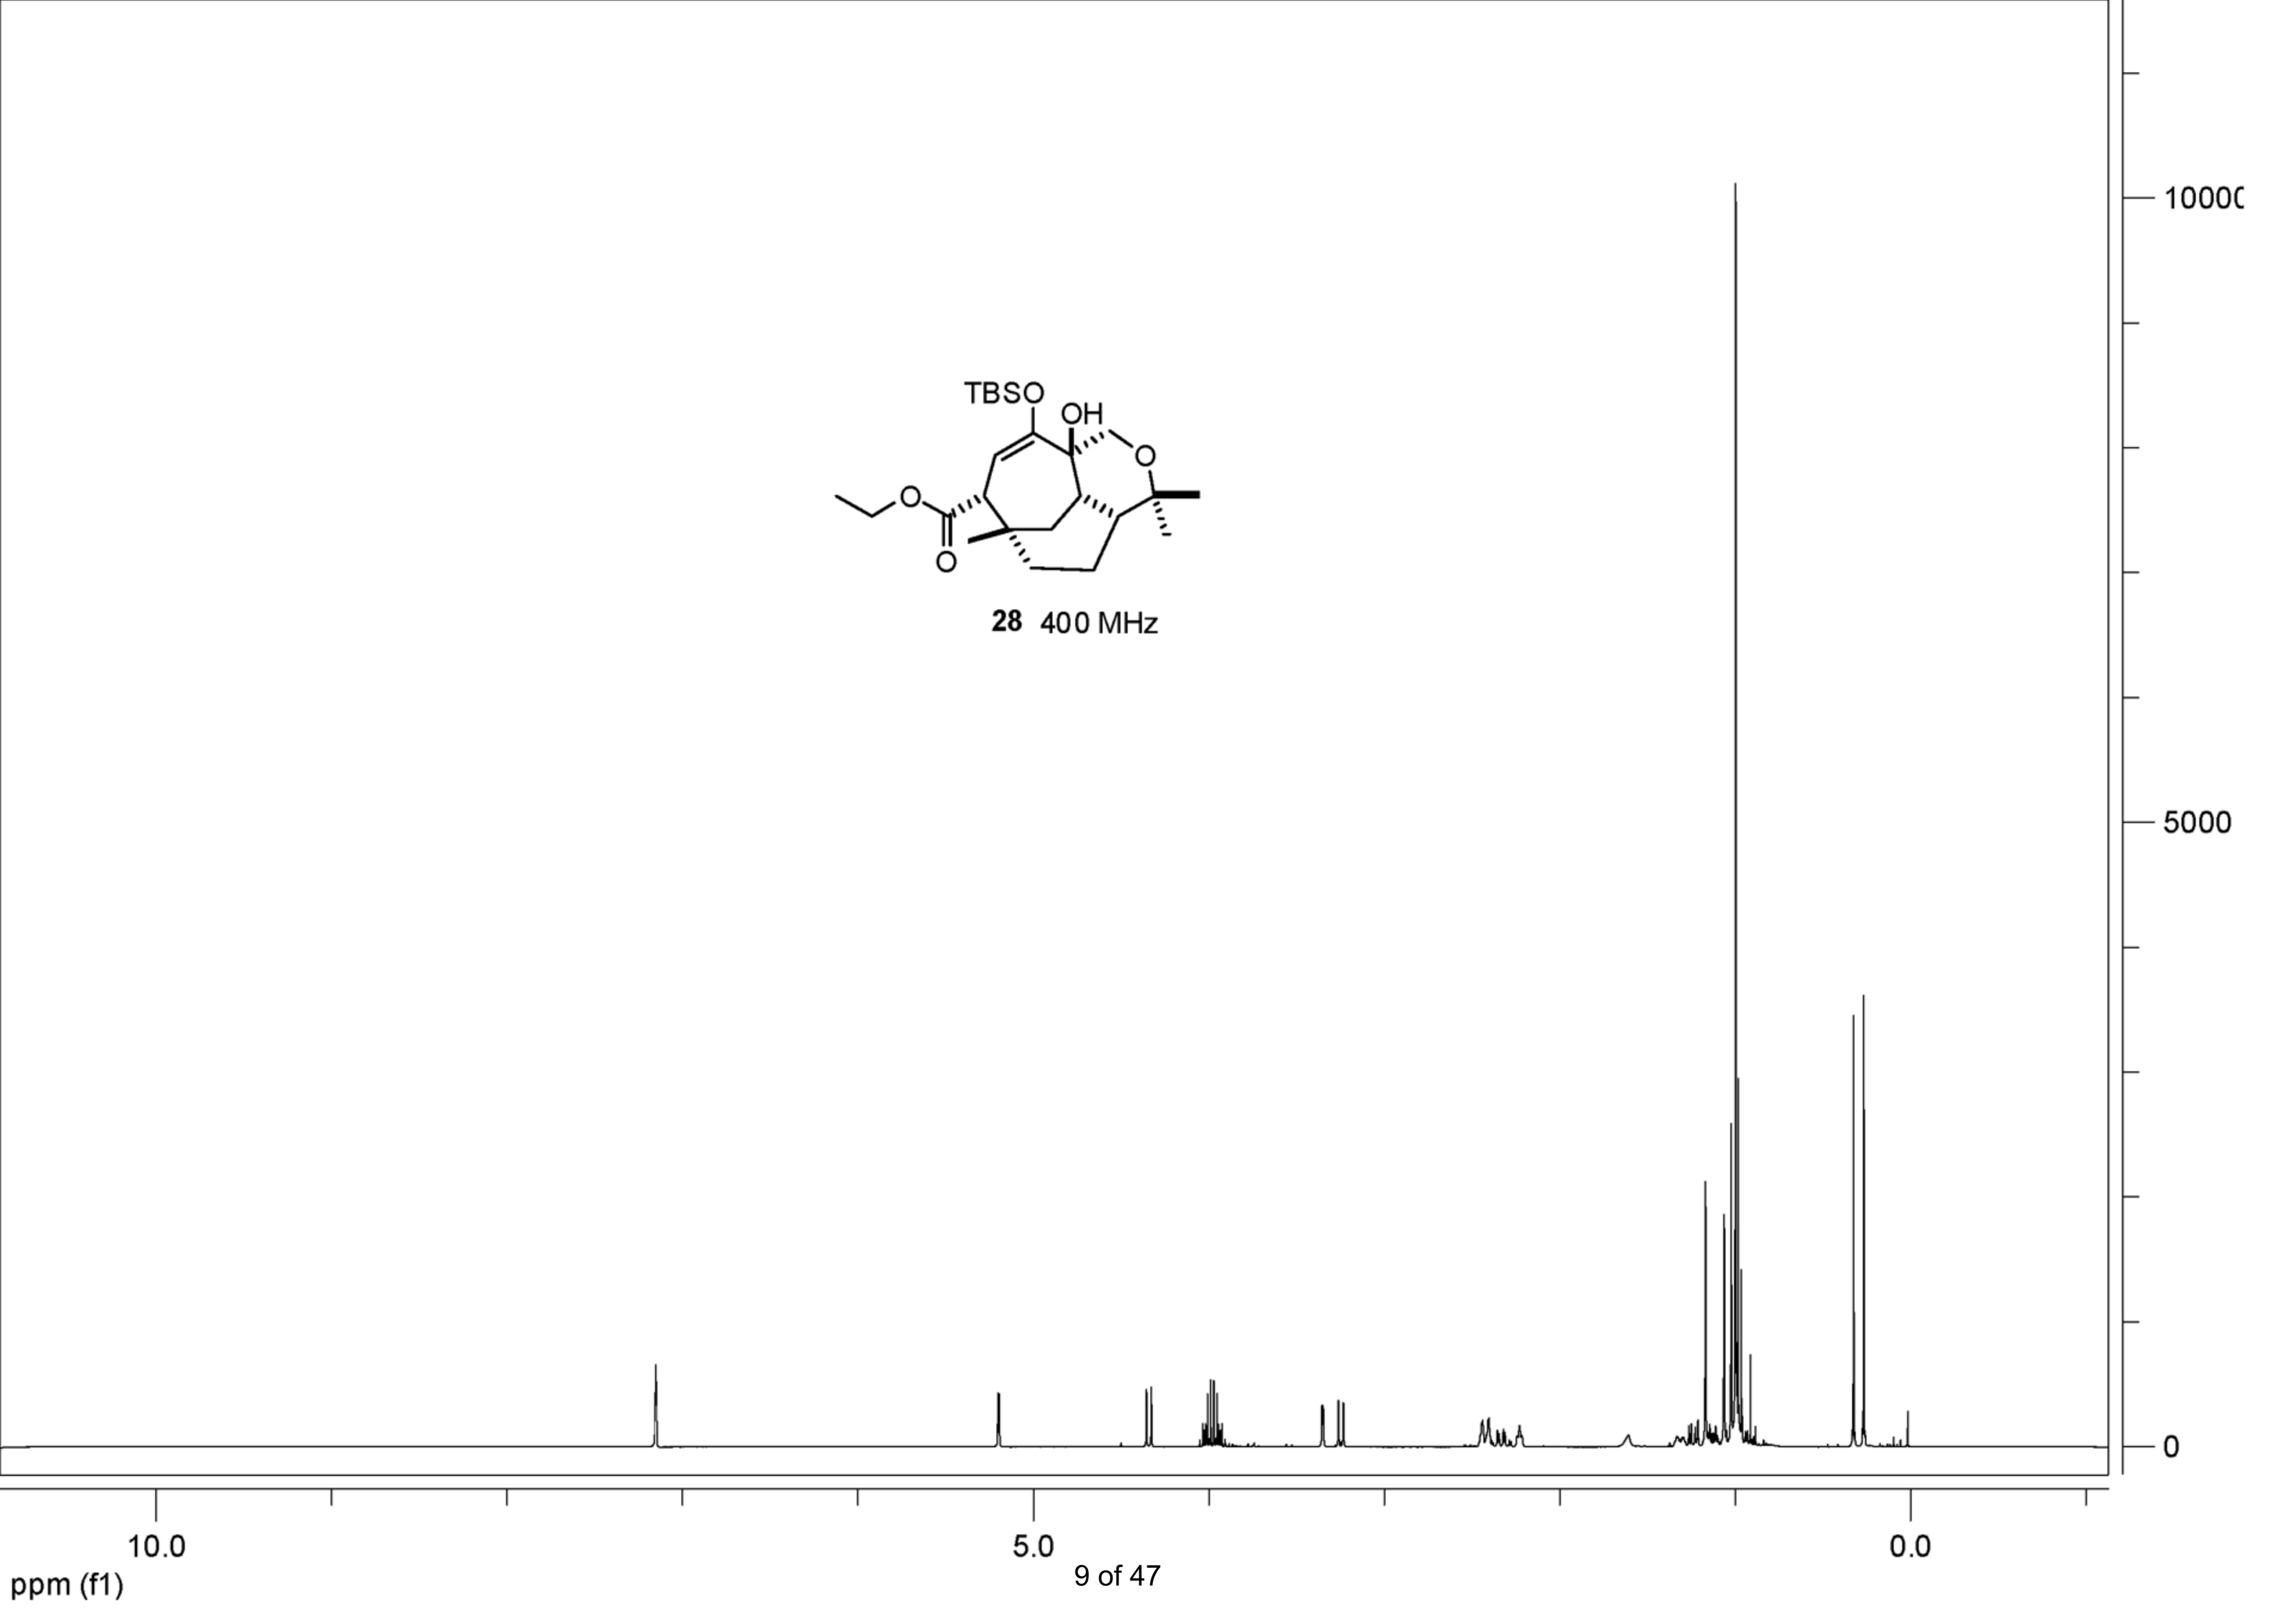

ppm (f1)

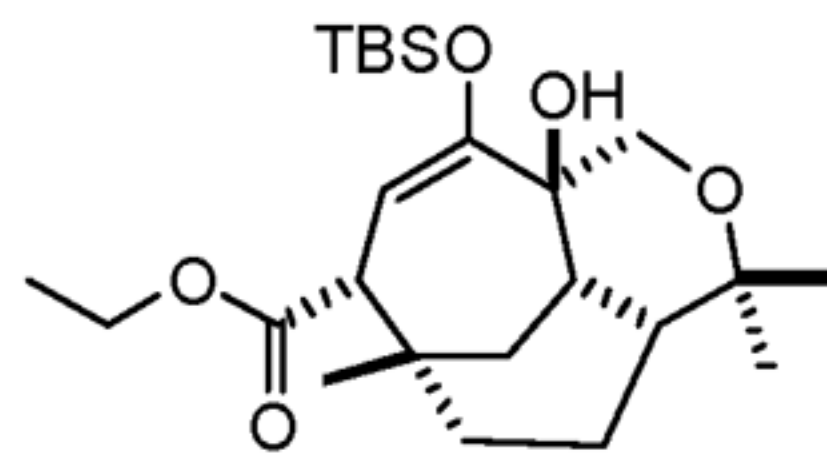

28 100 MHz

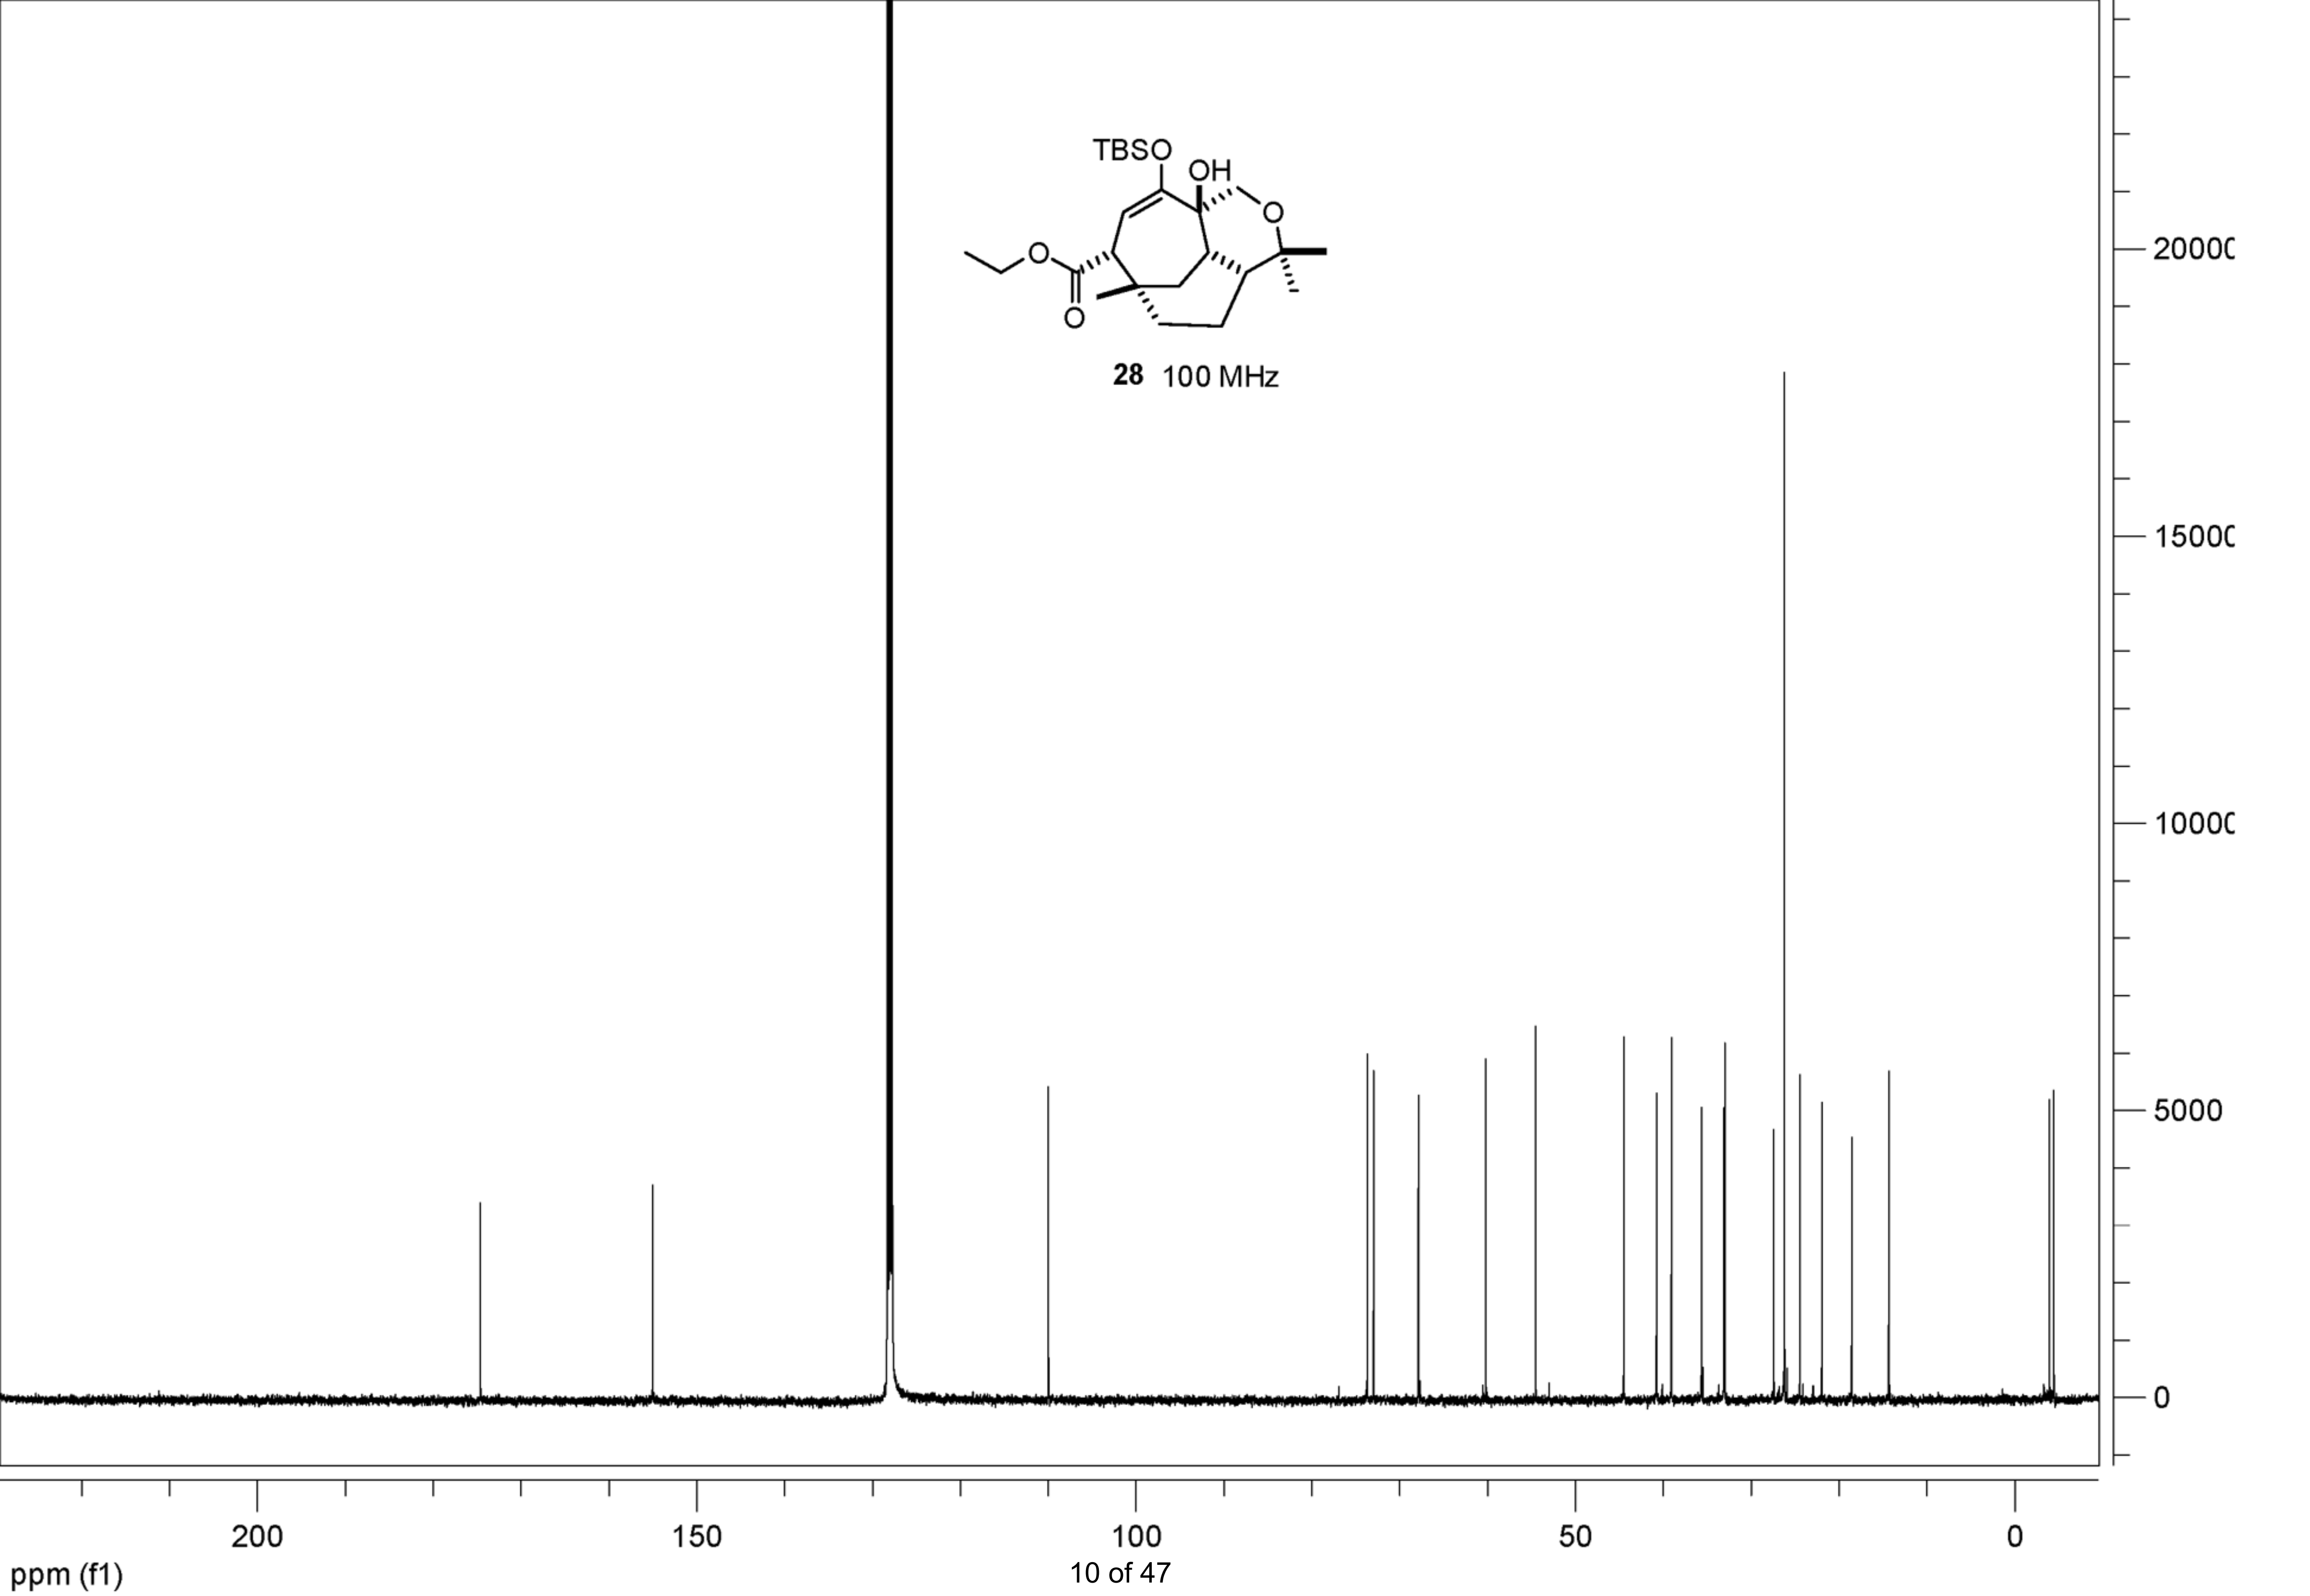

200

150

100

50

0

ppm (f1)

10 of 47

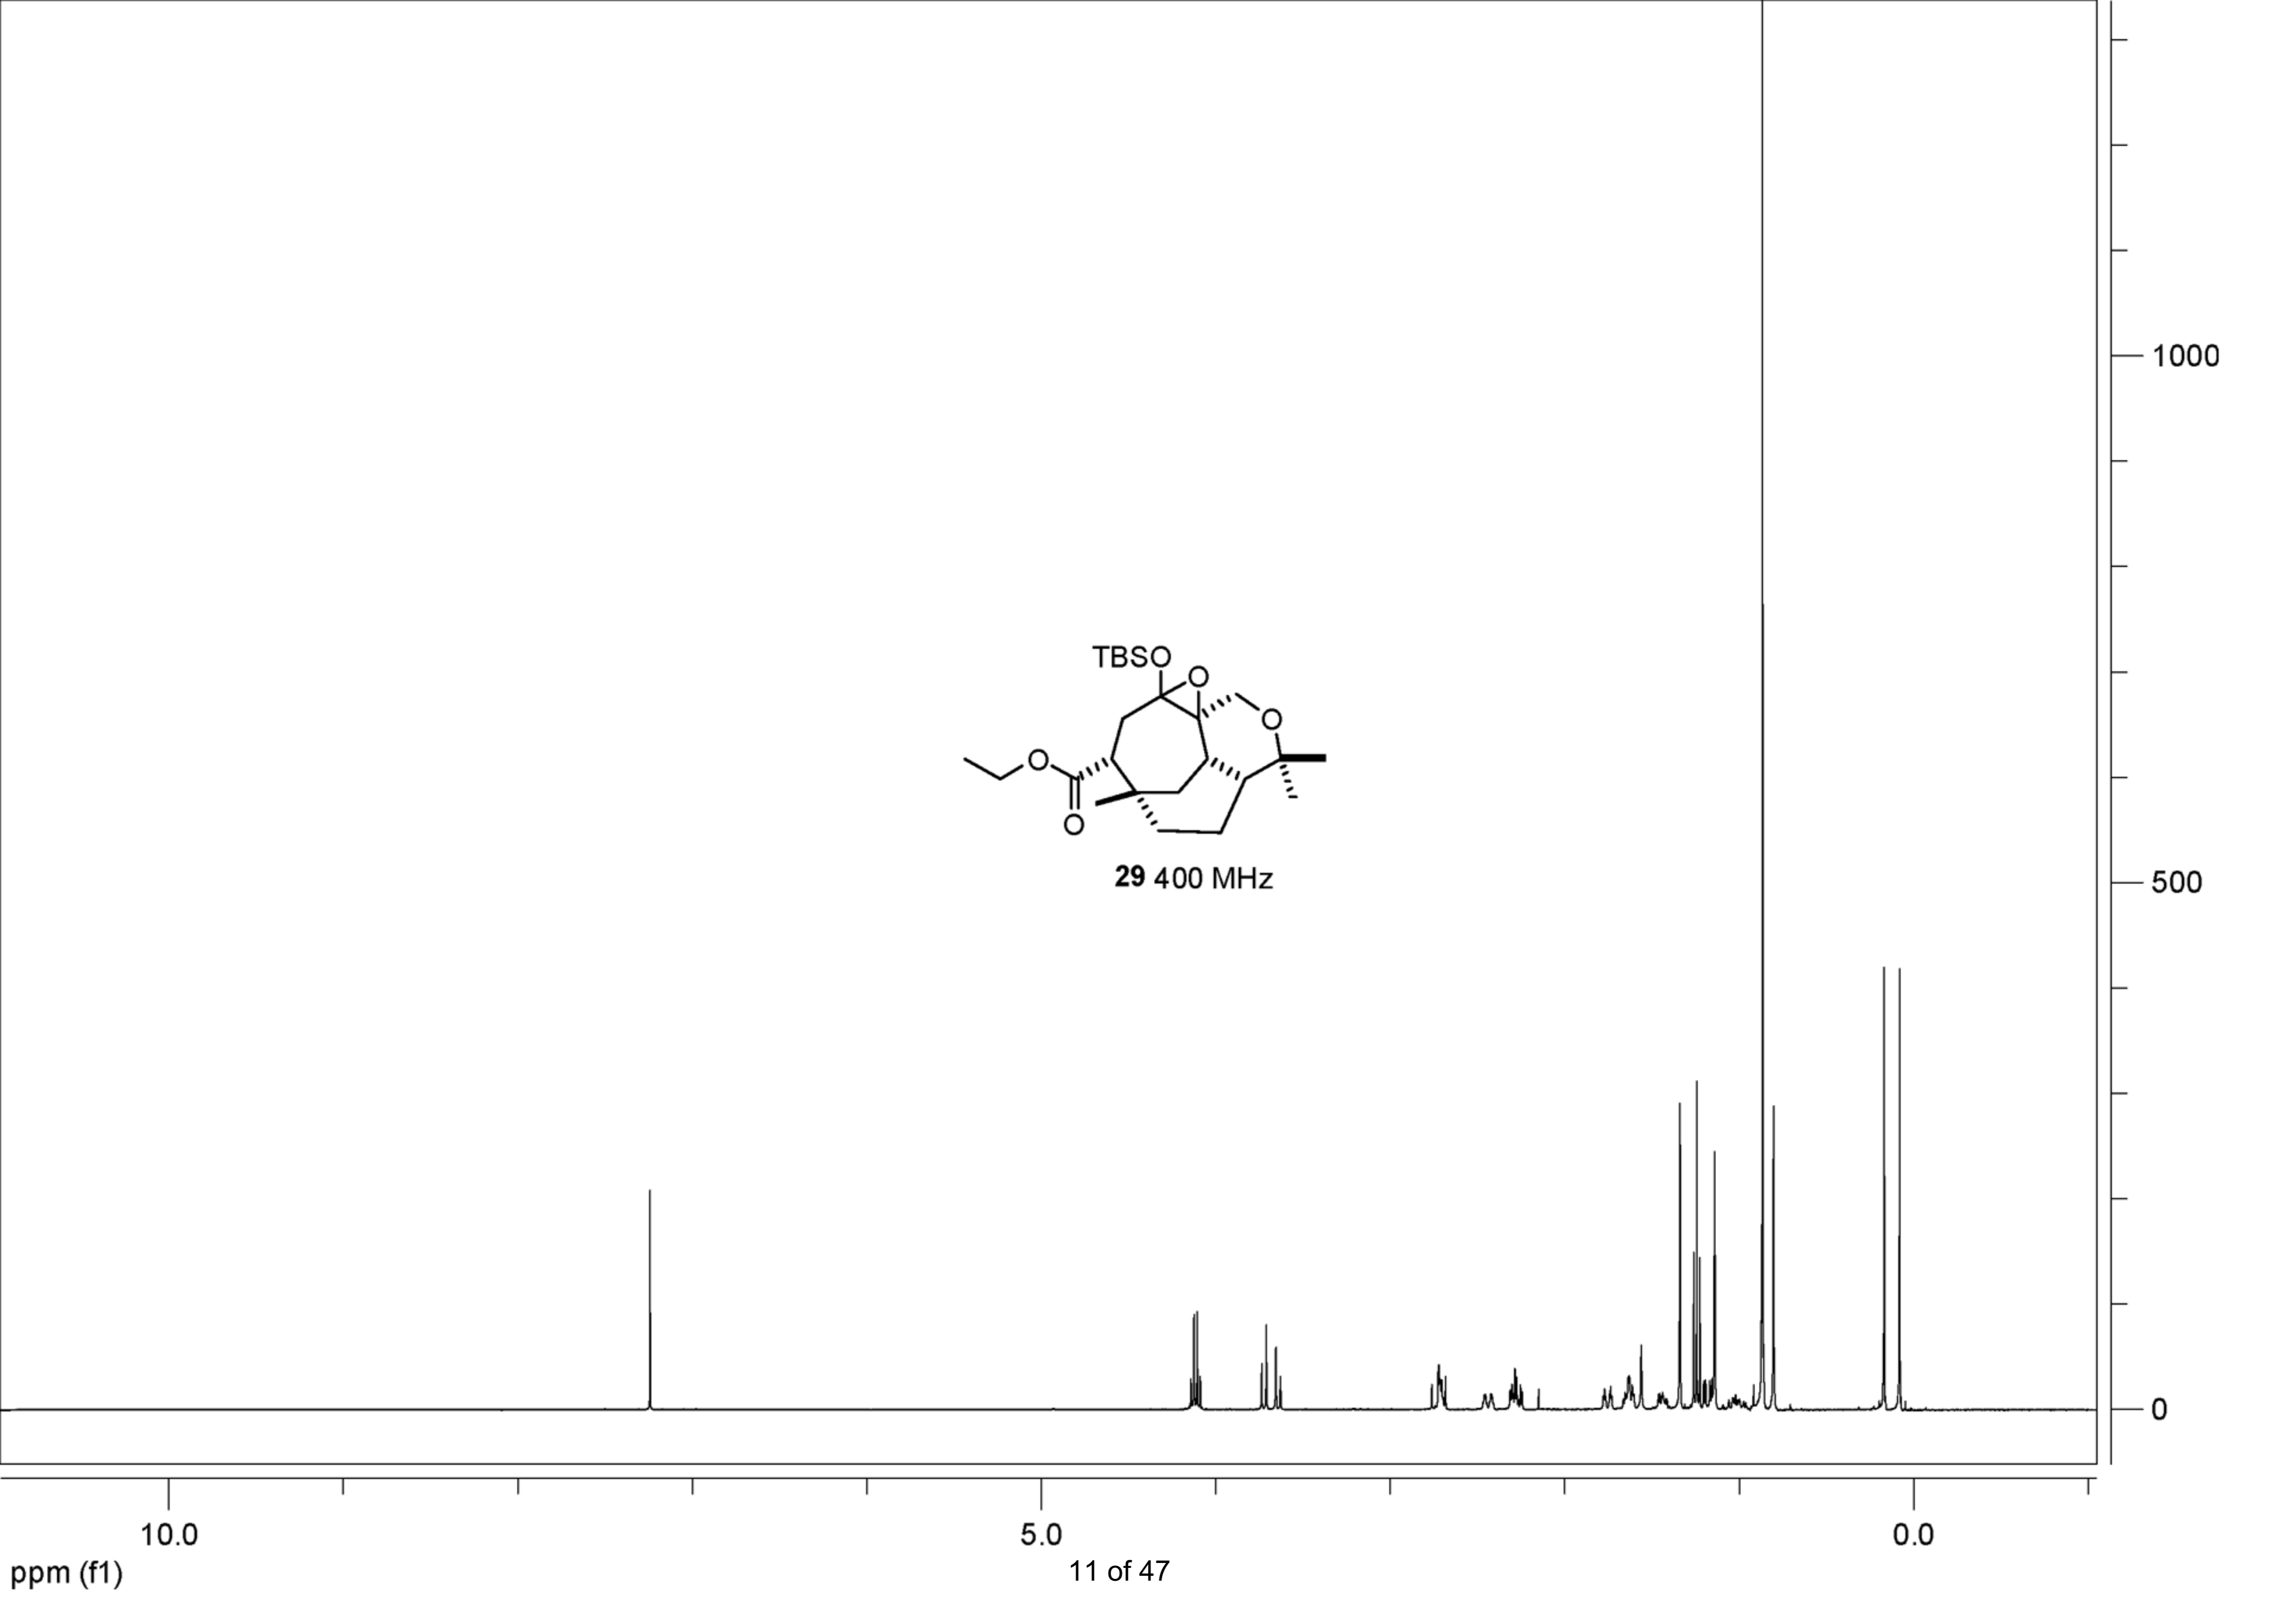

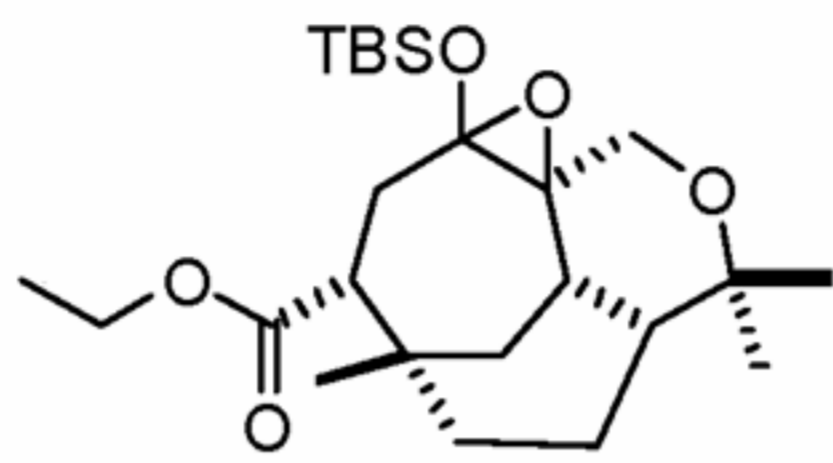

29 100 MHz

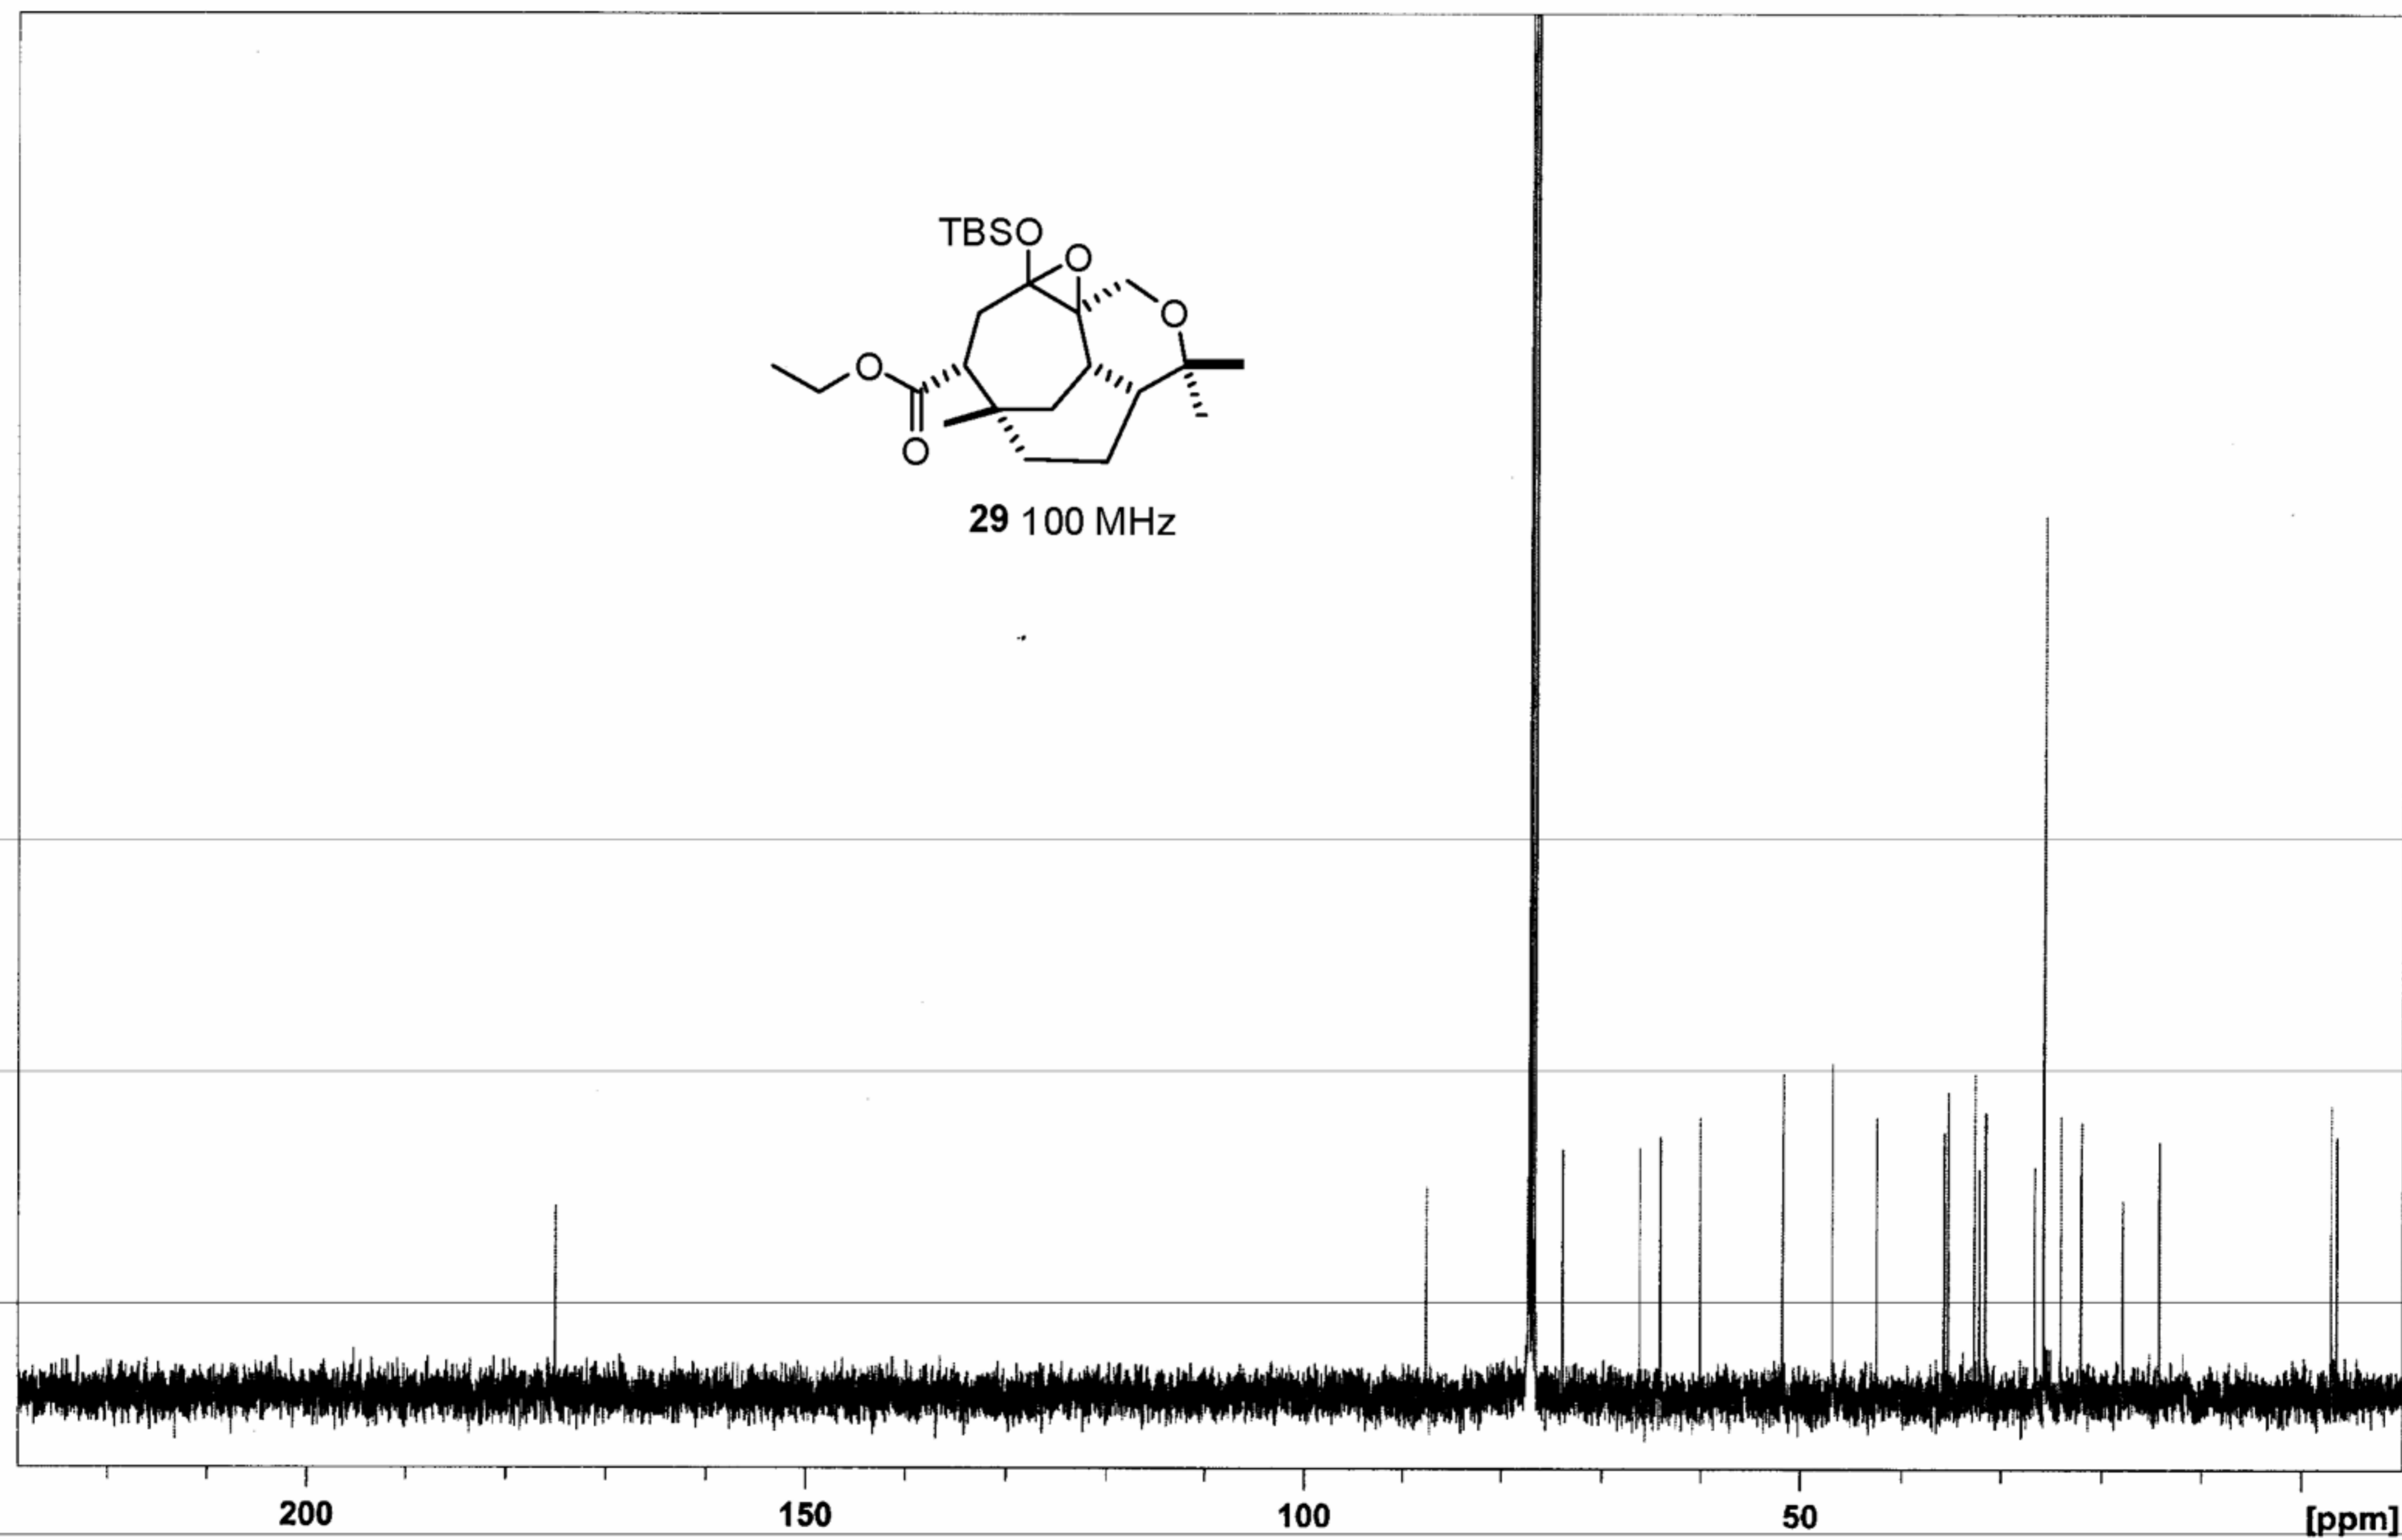

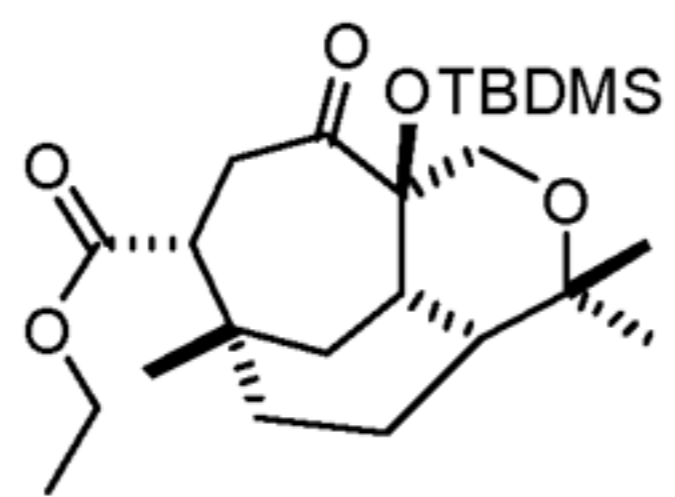

30 400 MHz

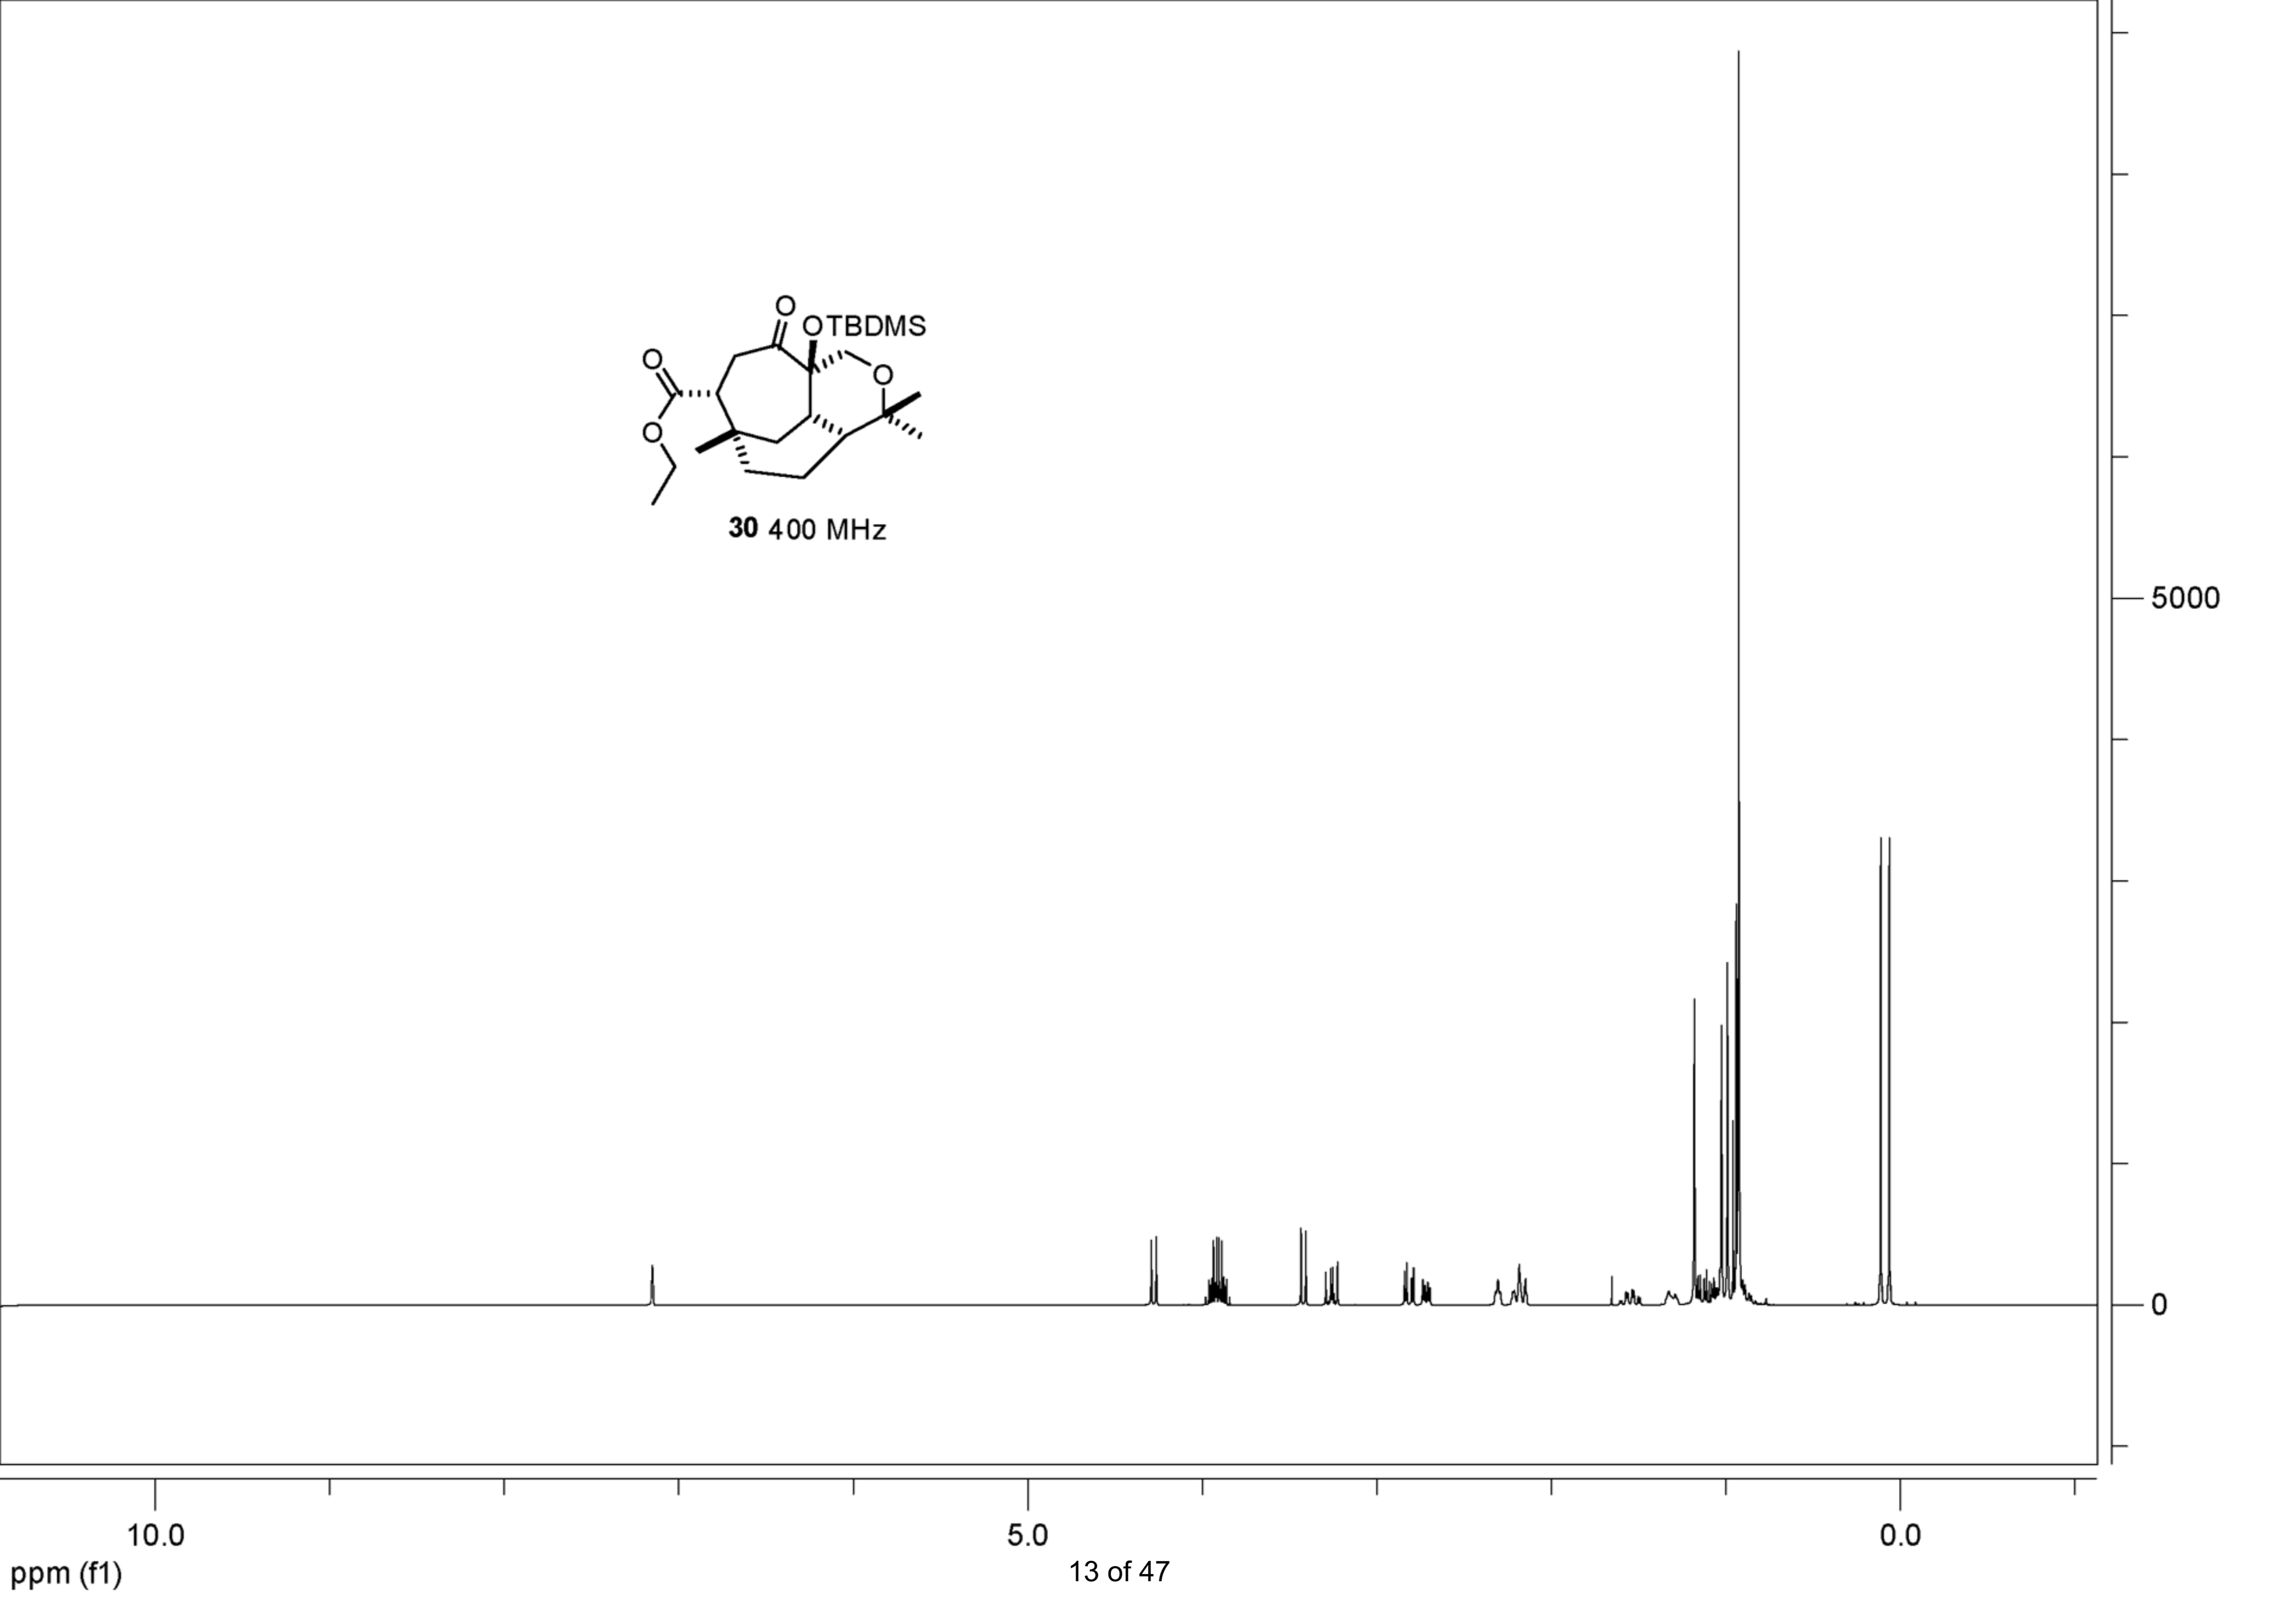

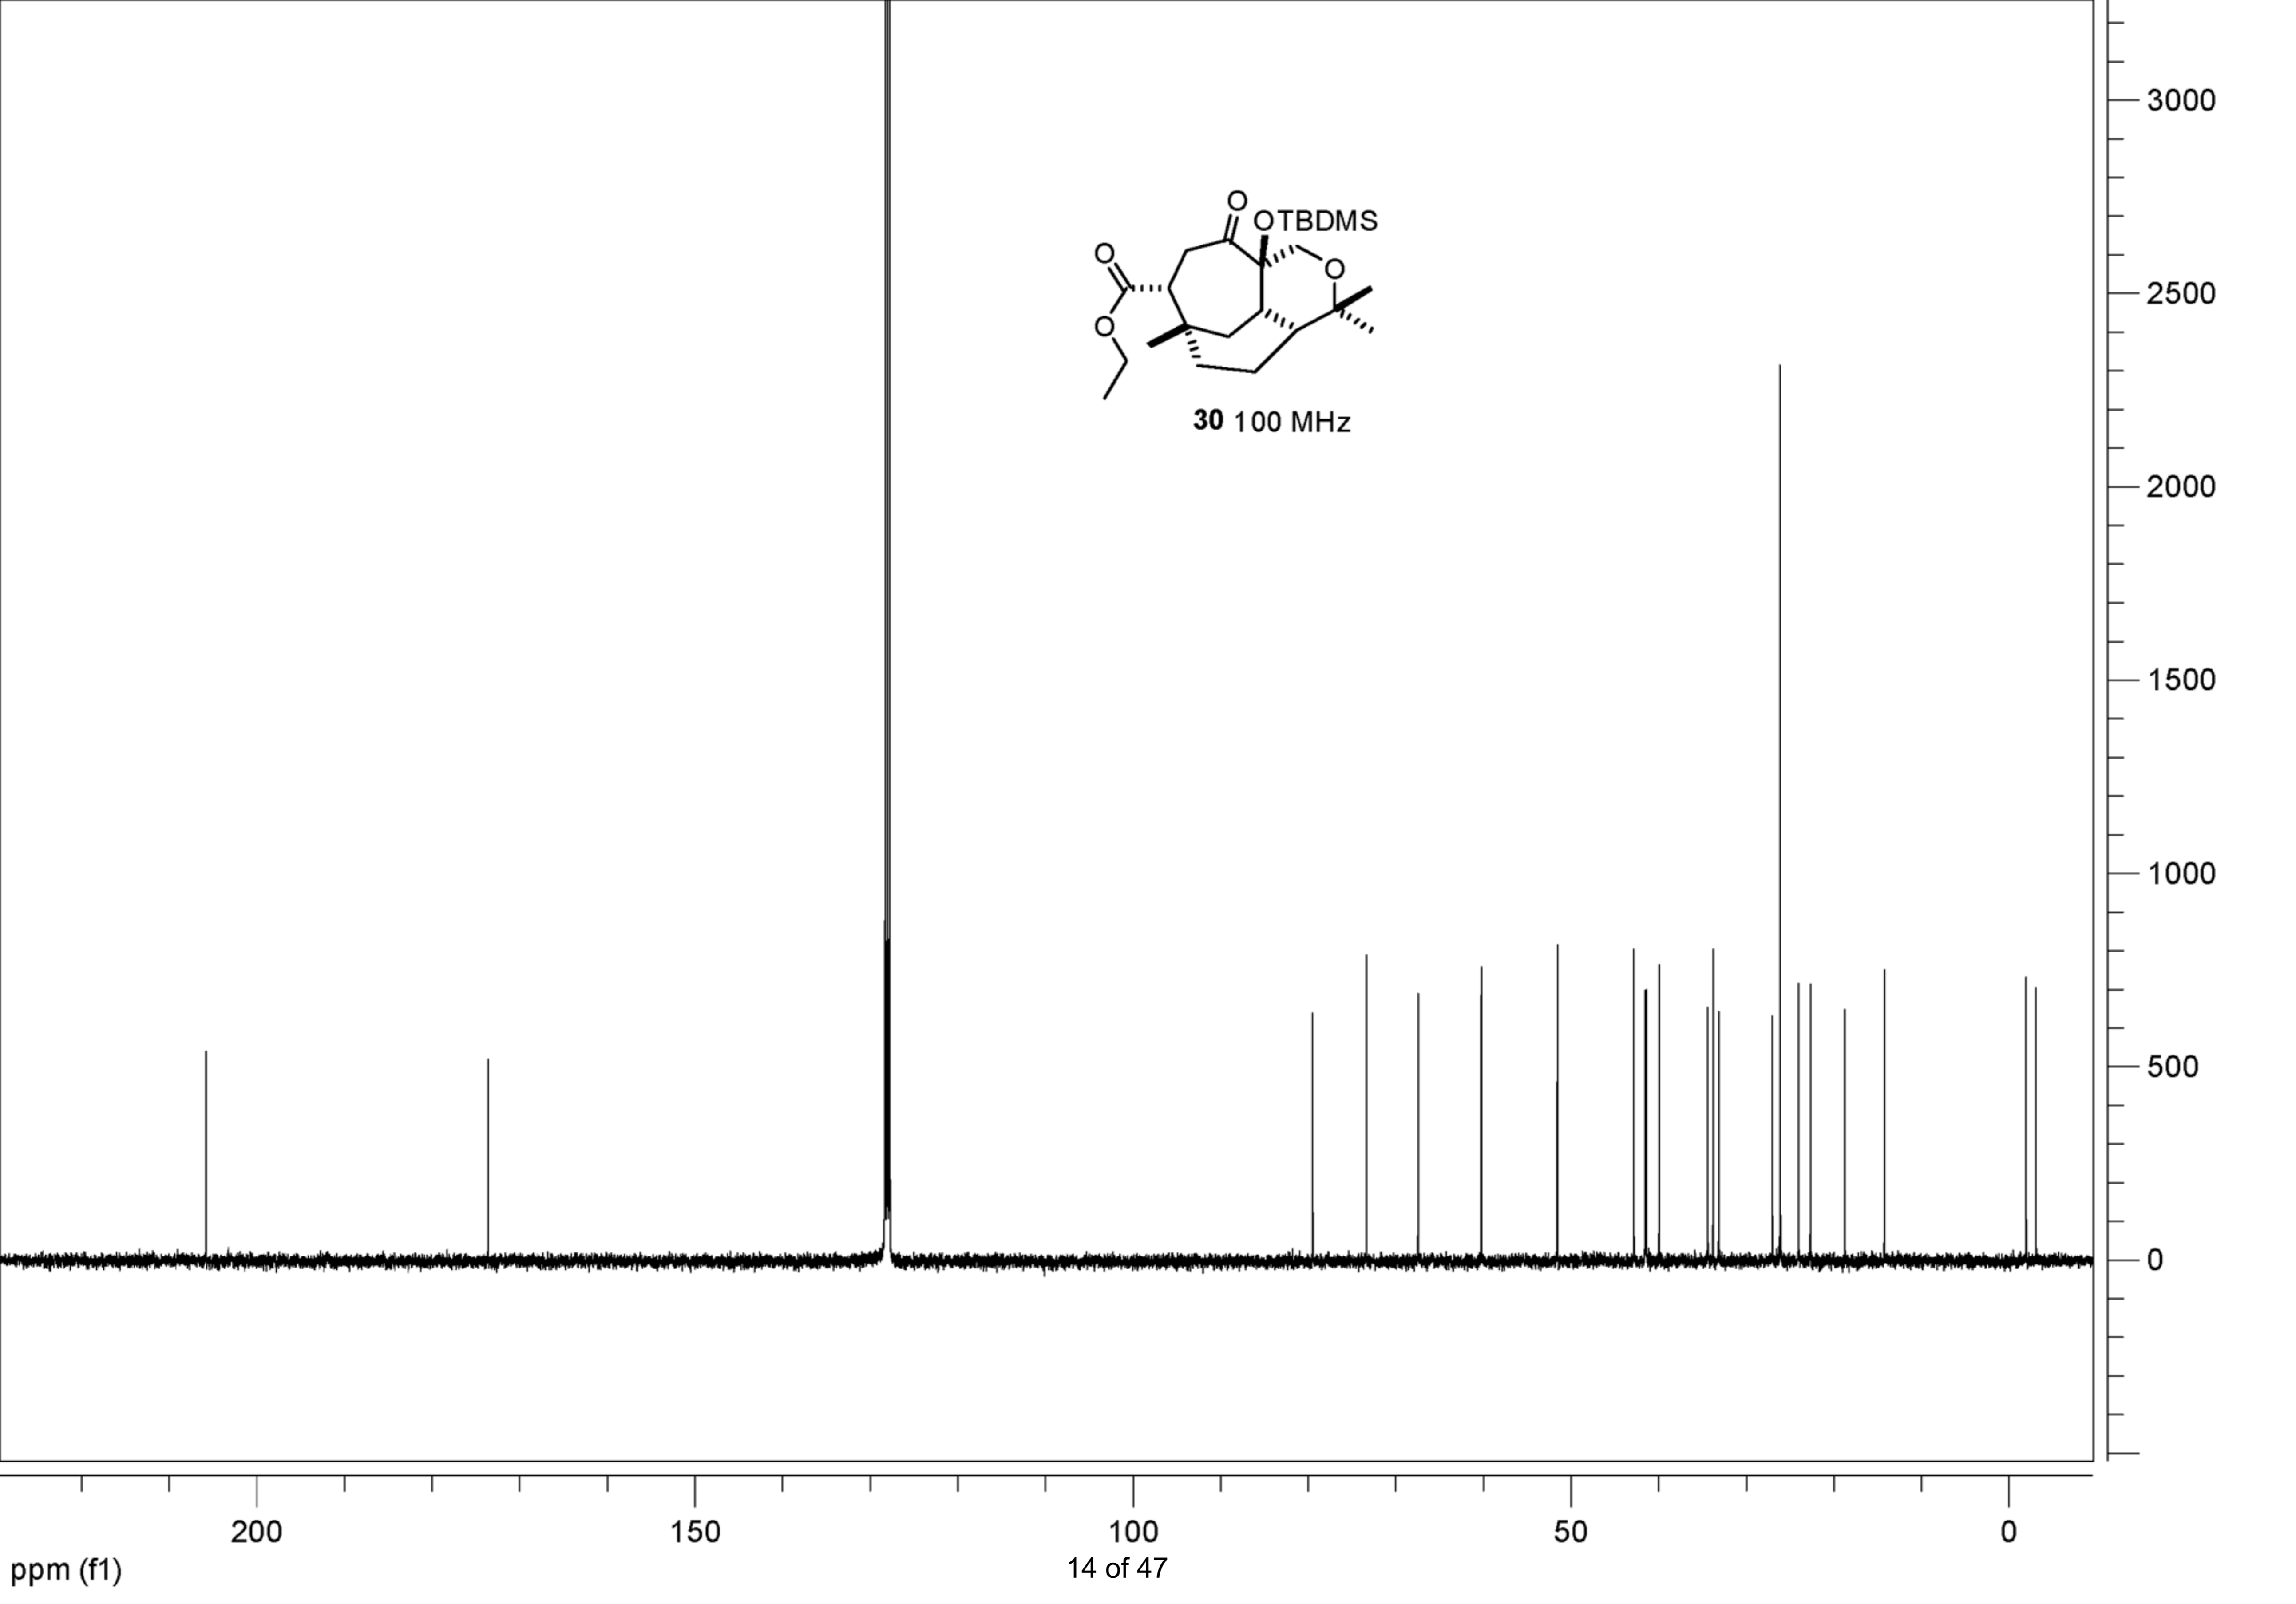

ppm (f1)

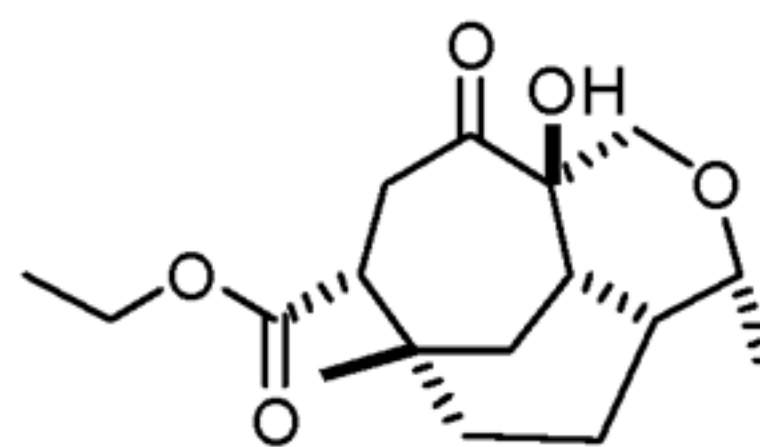

31 500 MHz

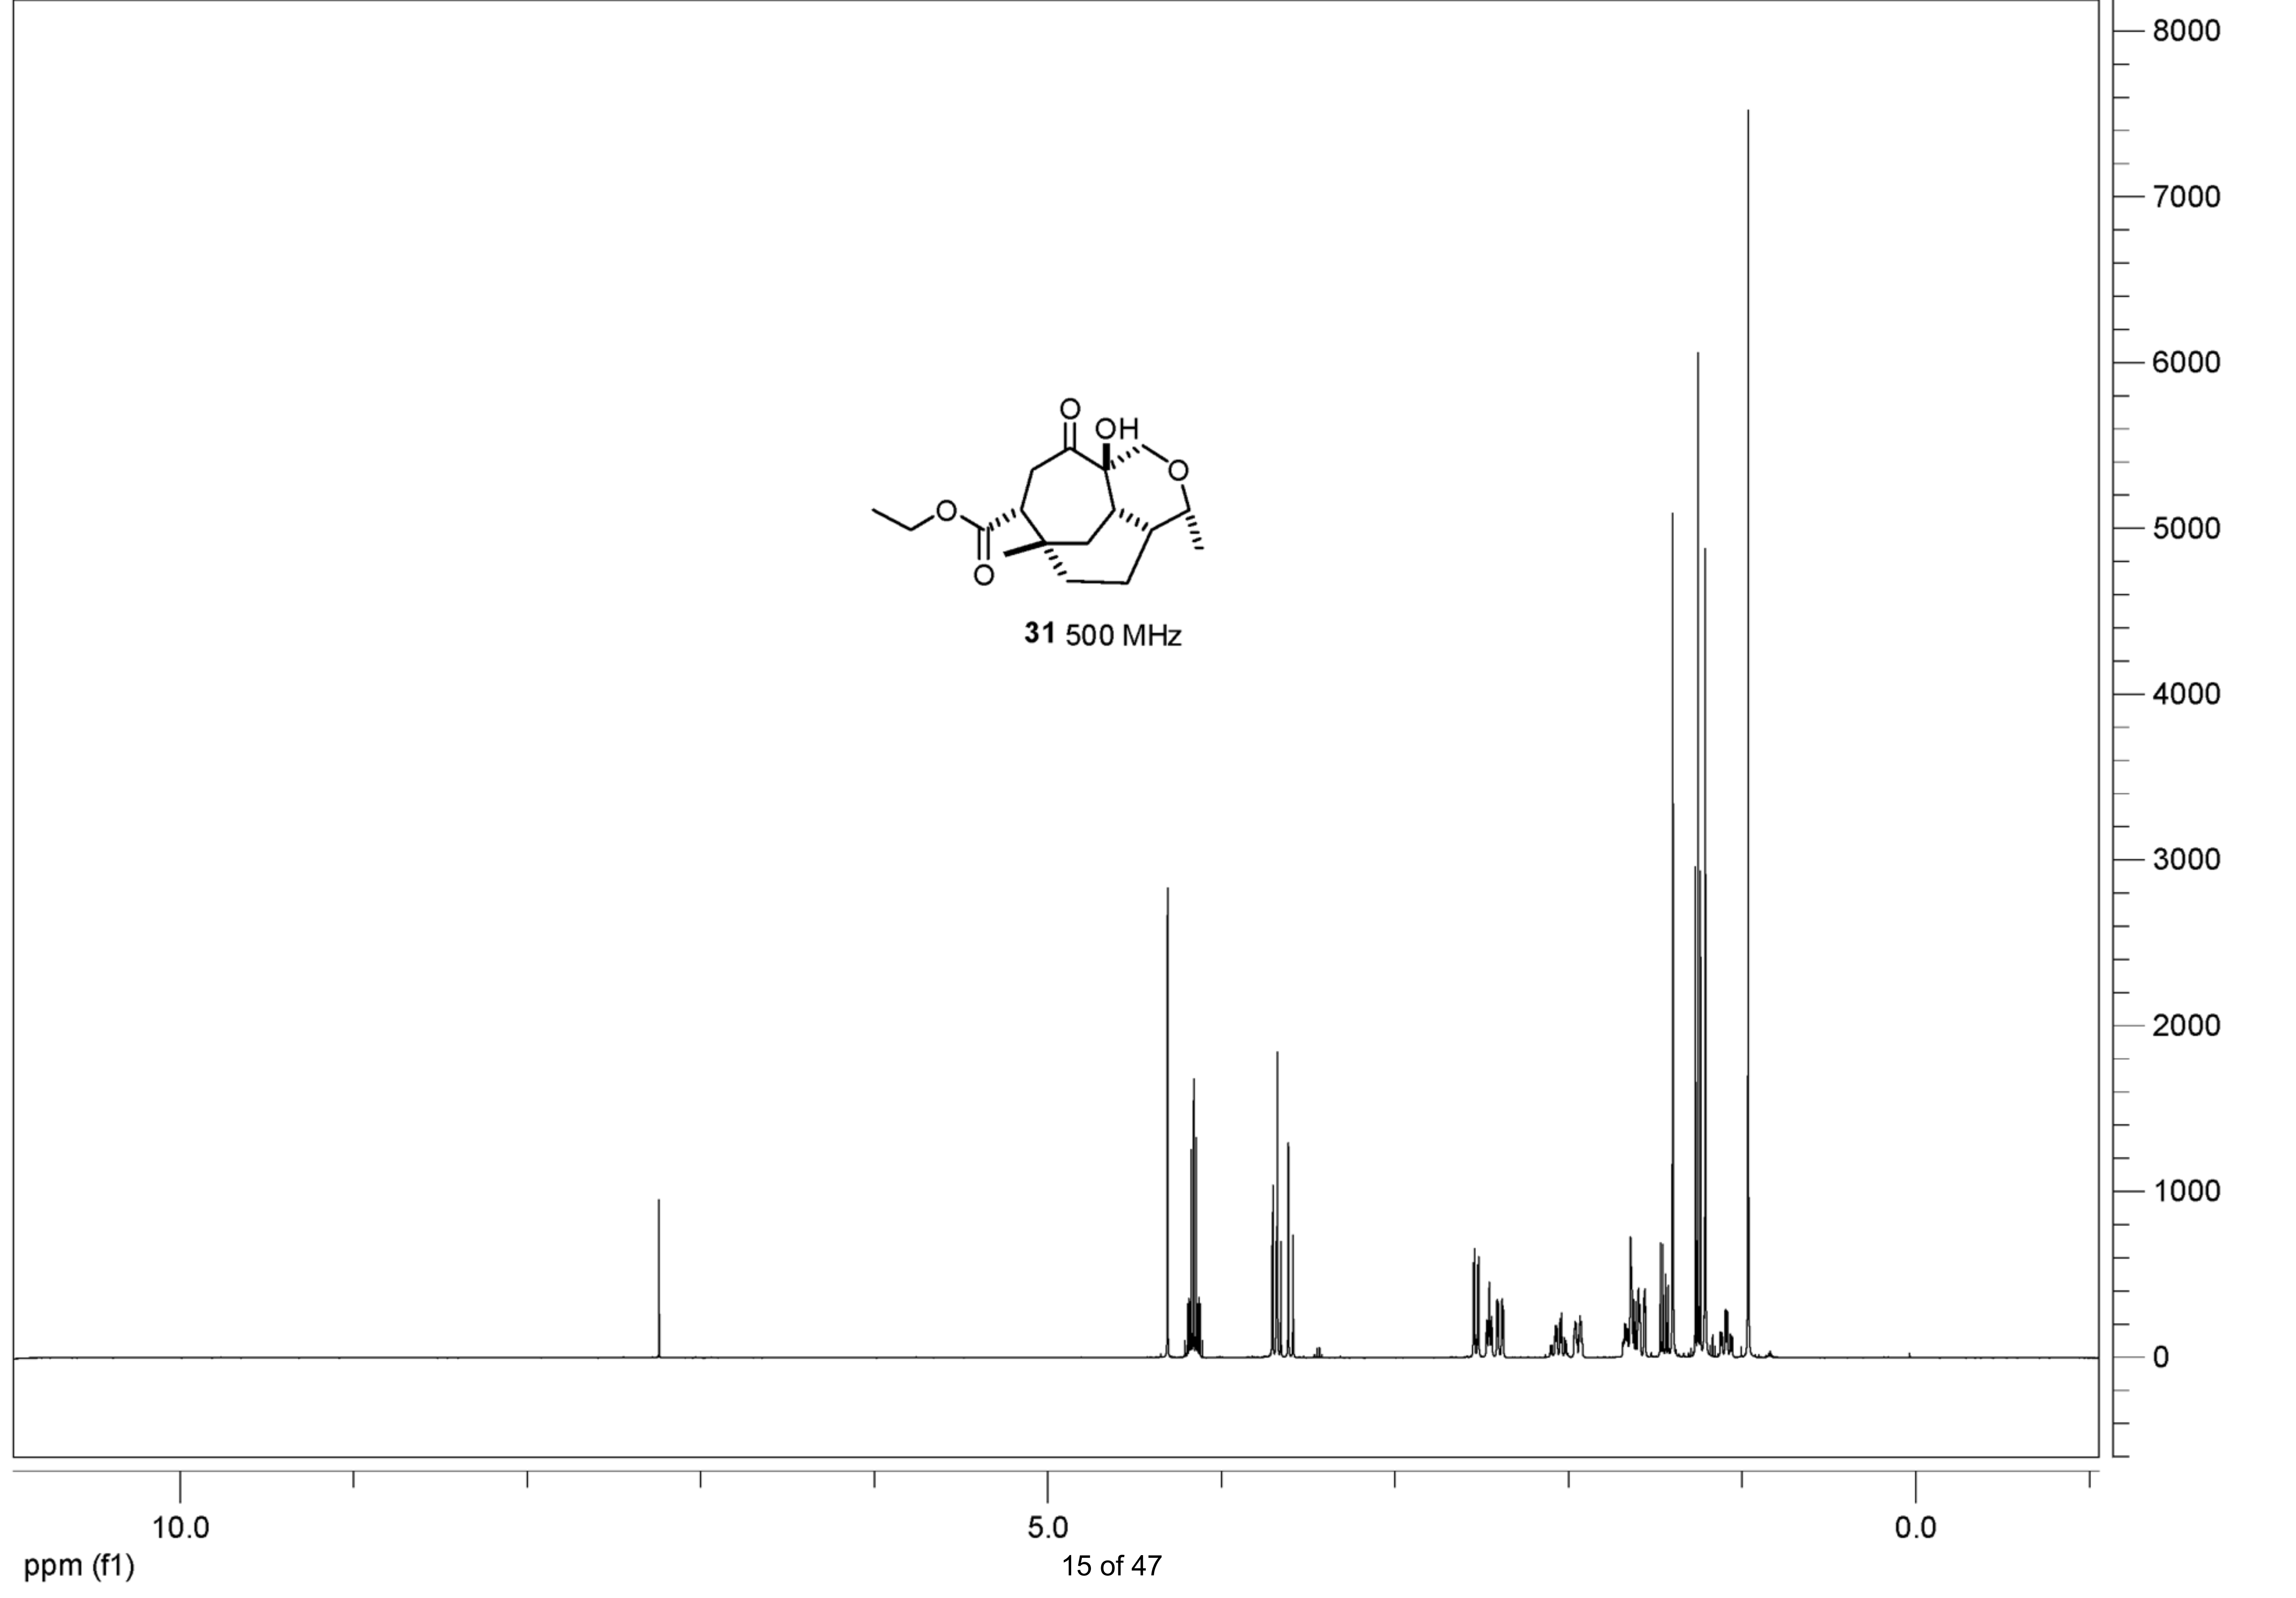

10.0

5.0

0.0

ppm (f1)

15 of 47



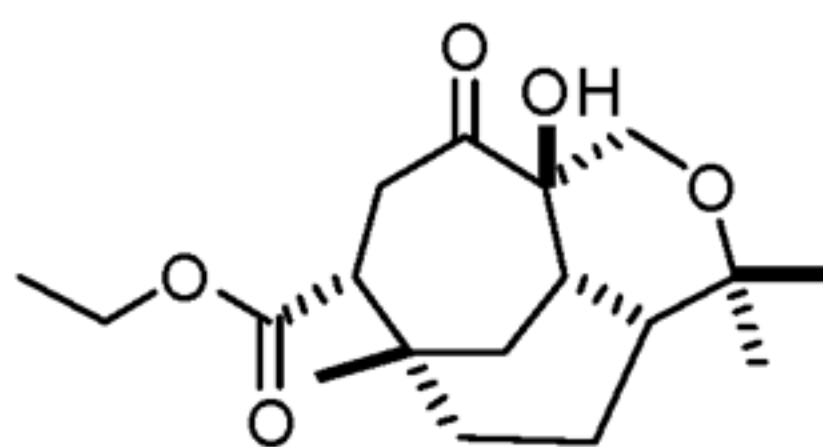

31 125 MHz

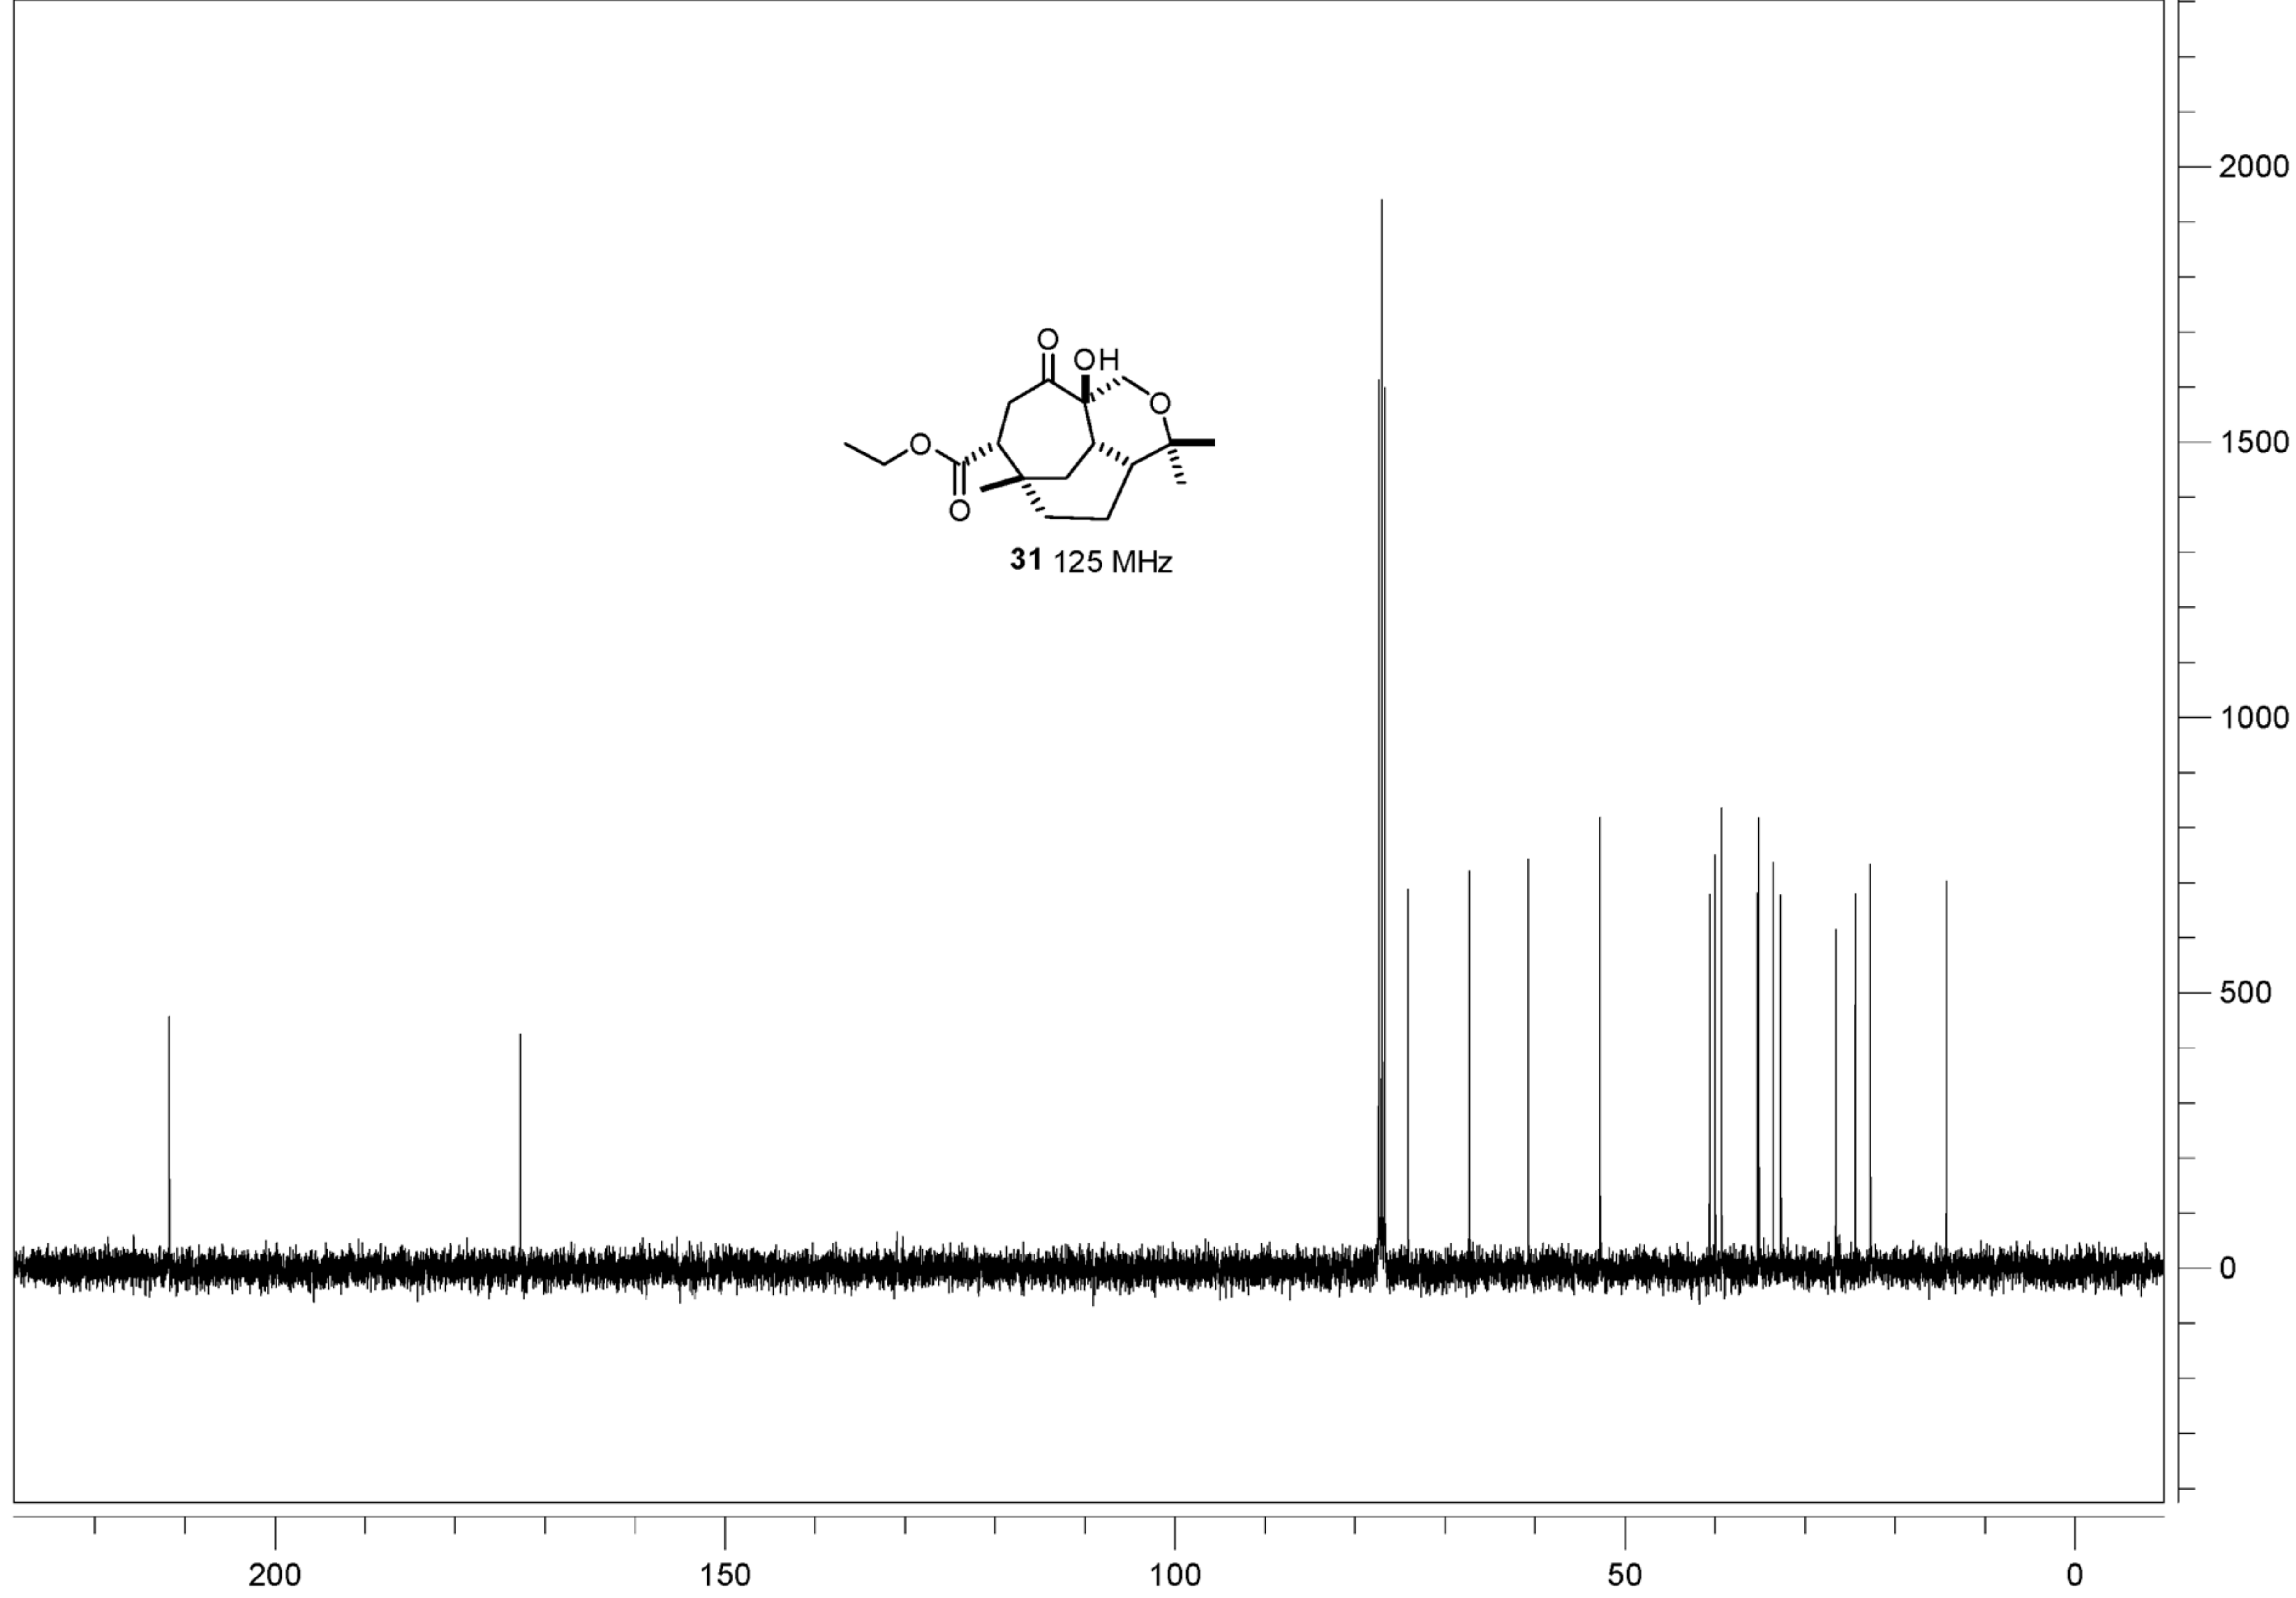

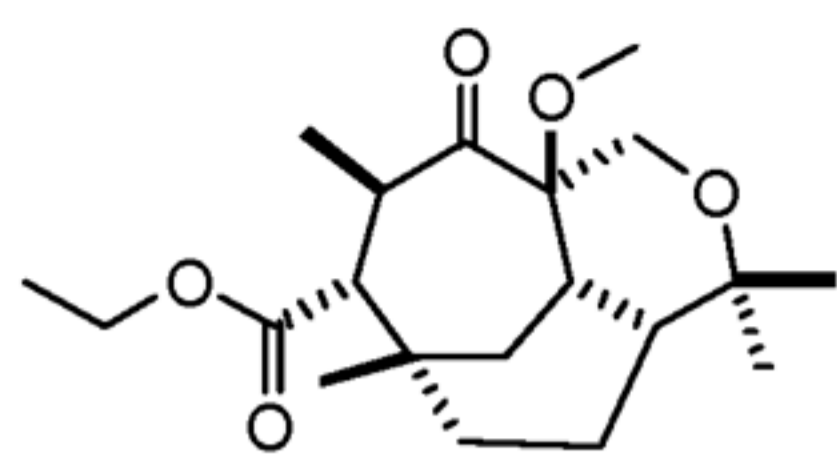

32 300 MHz

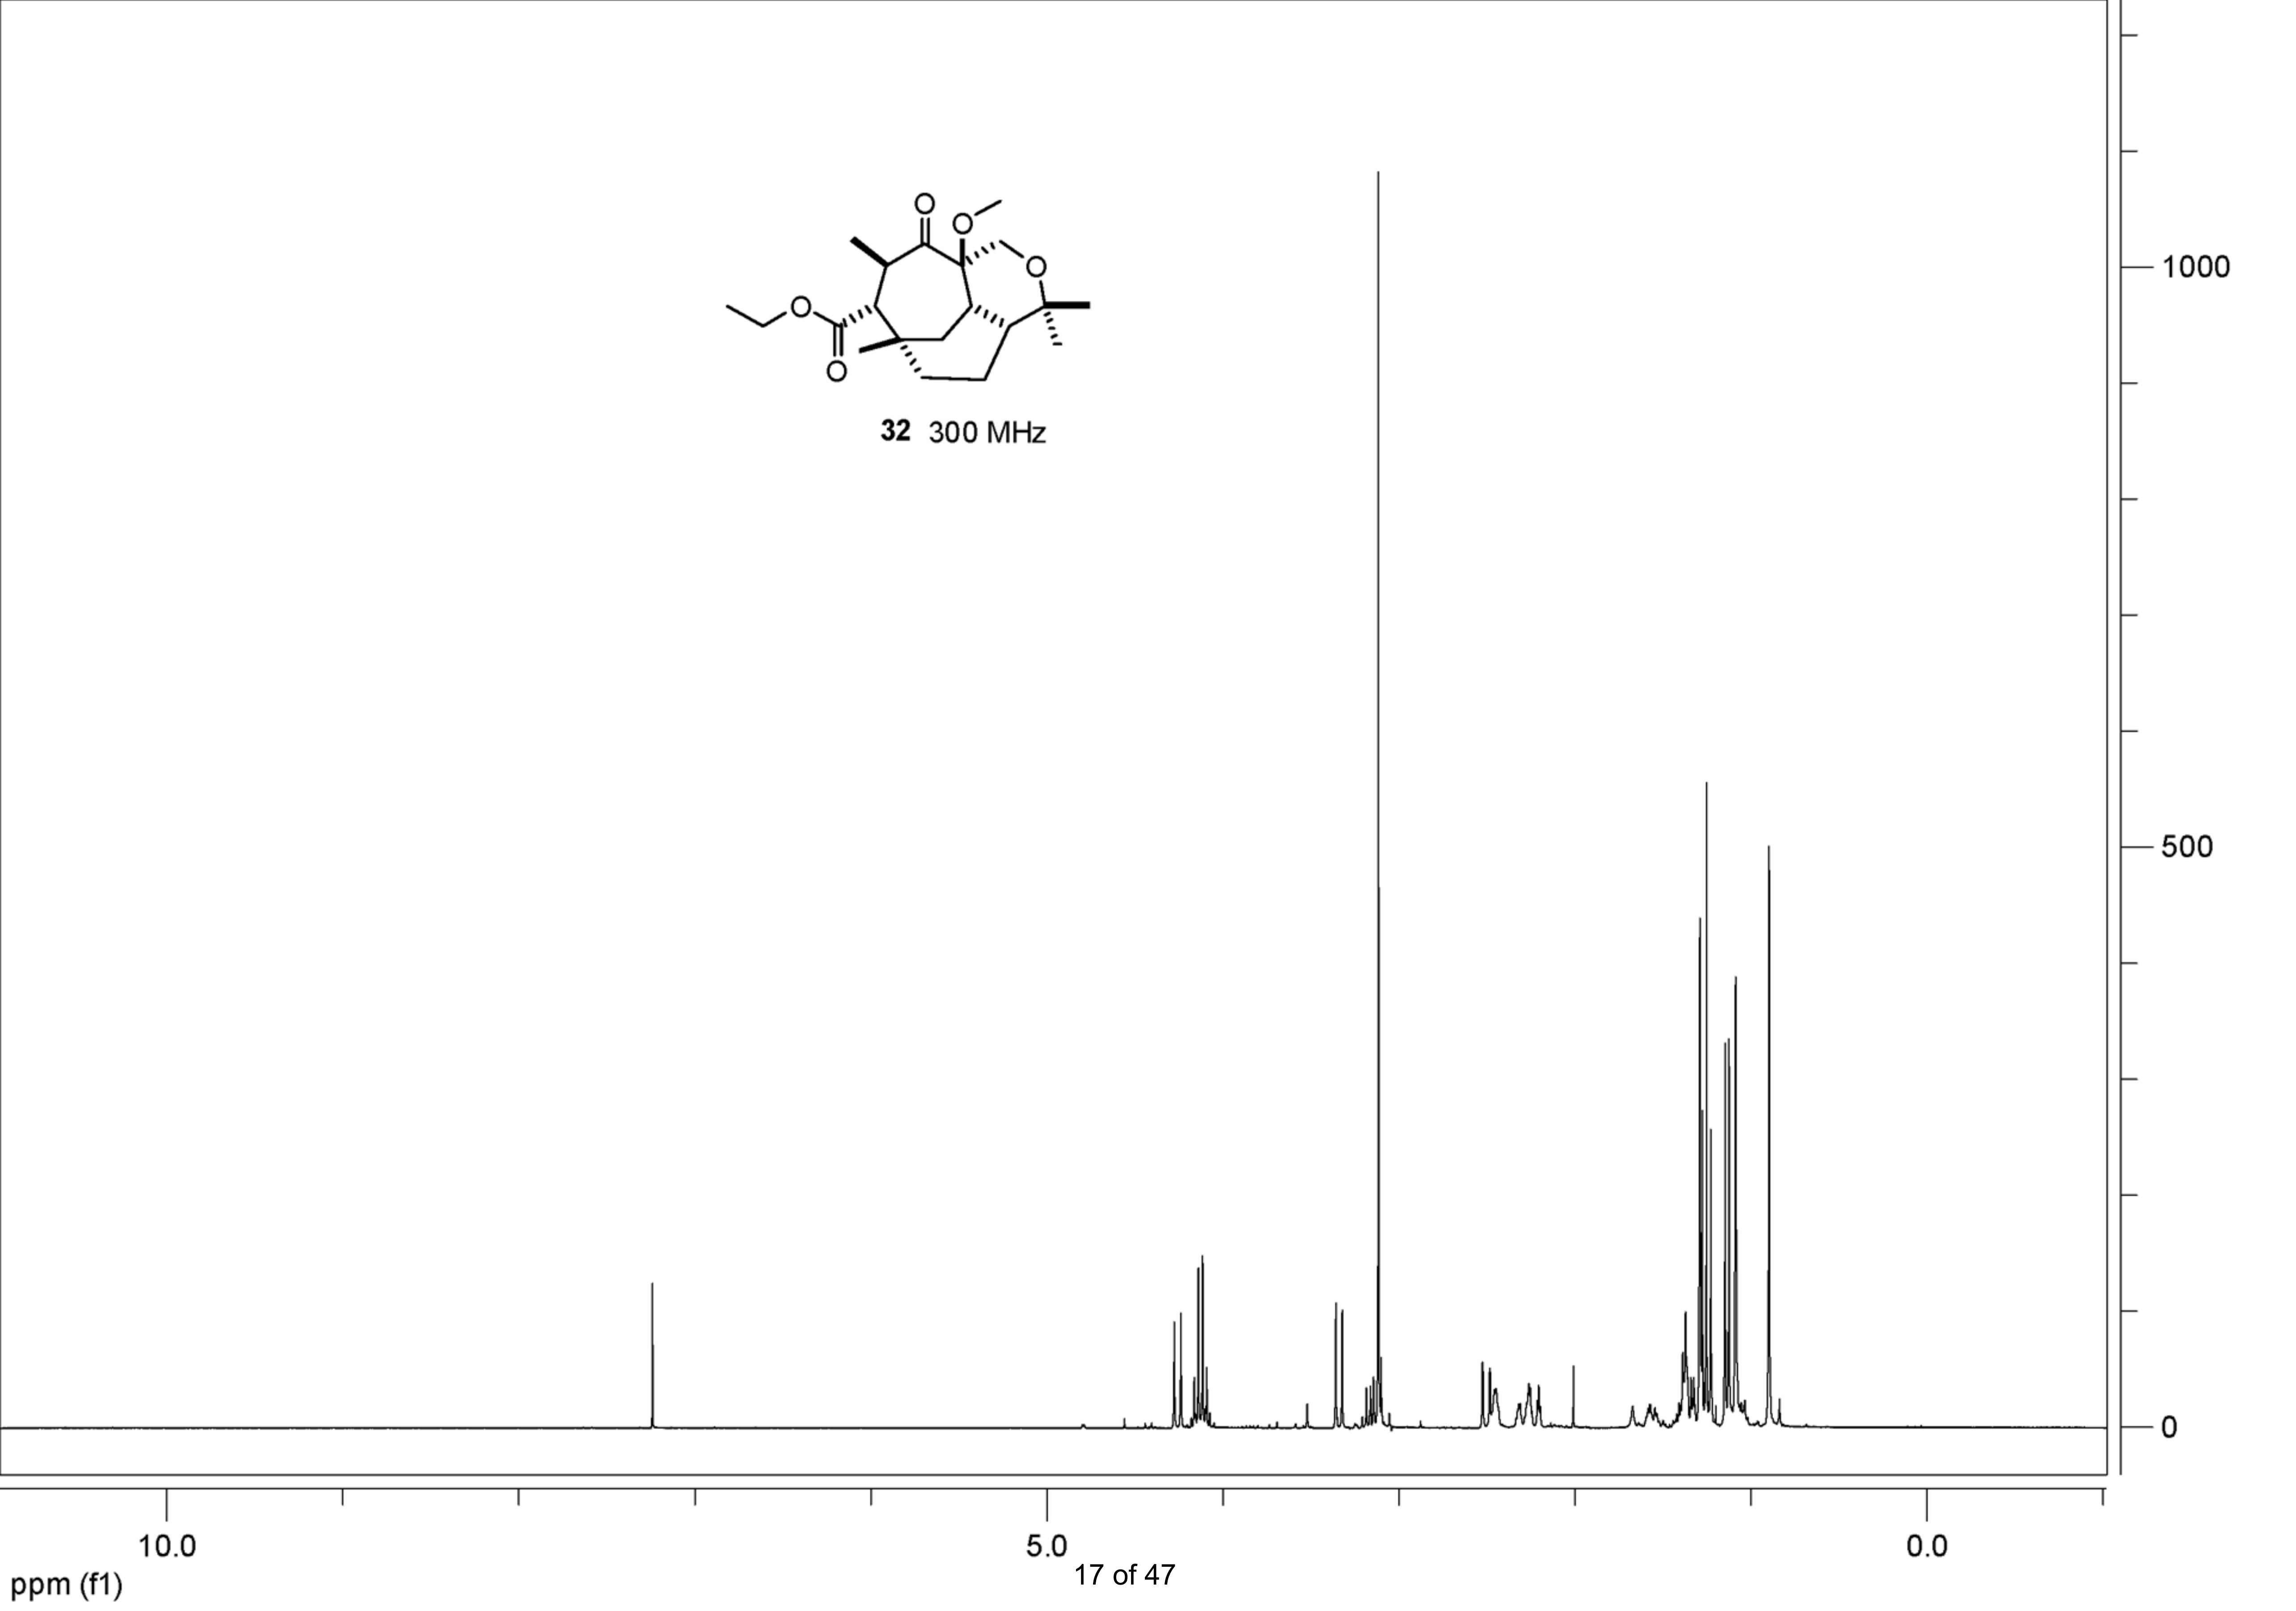

10.0

5.0

0.0

ppm (f1)

17 of 47

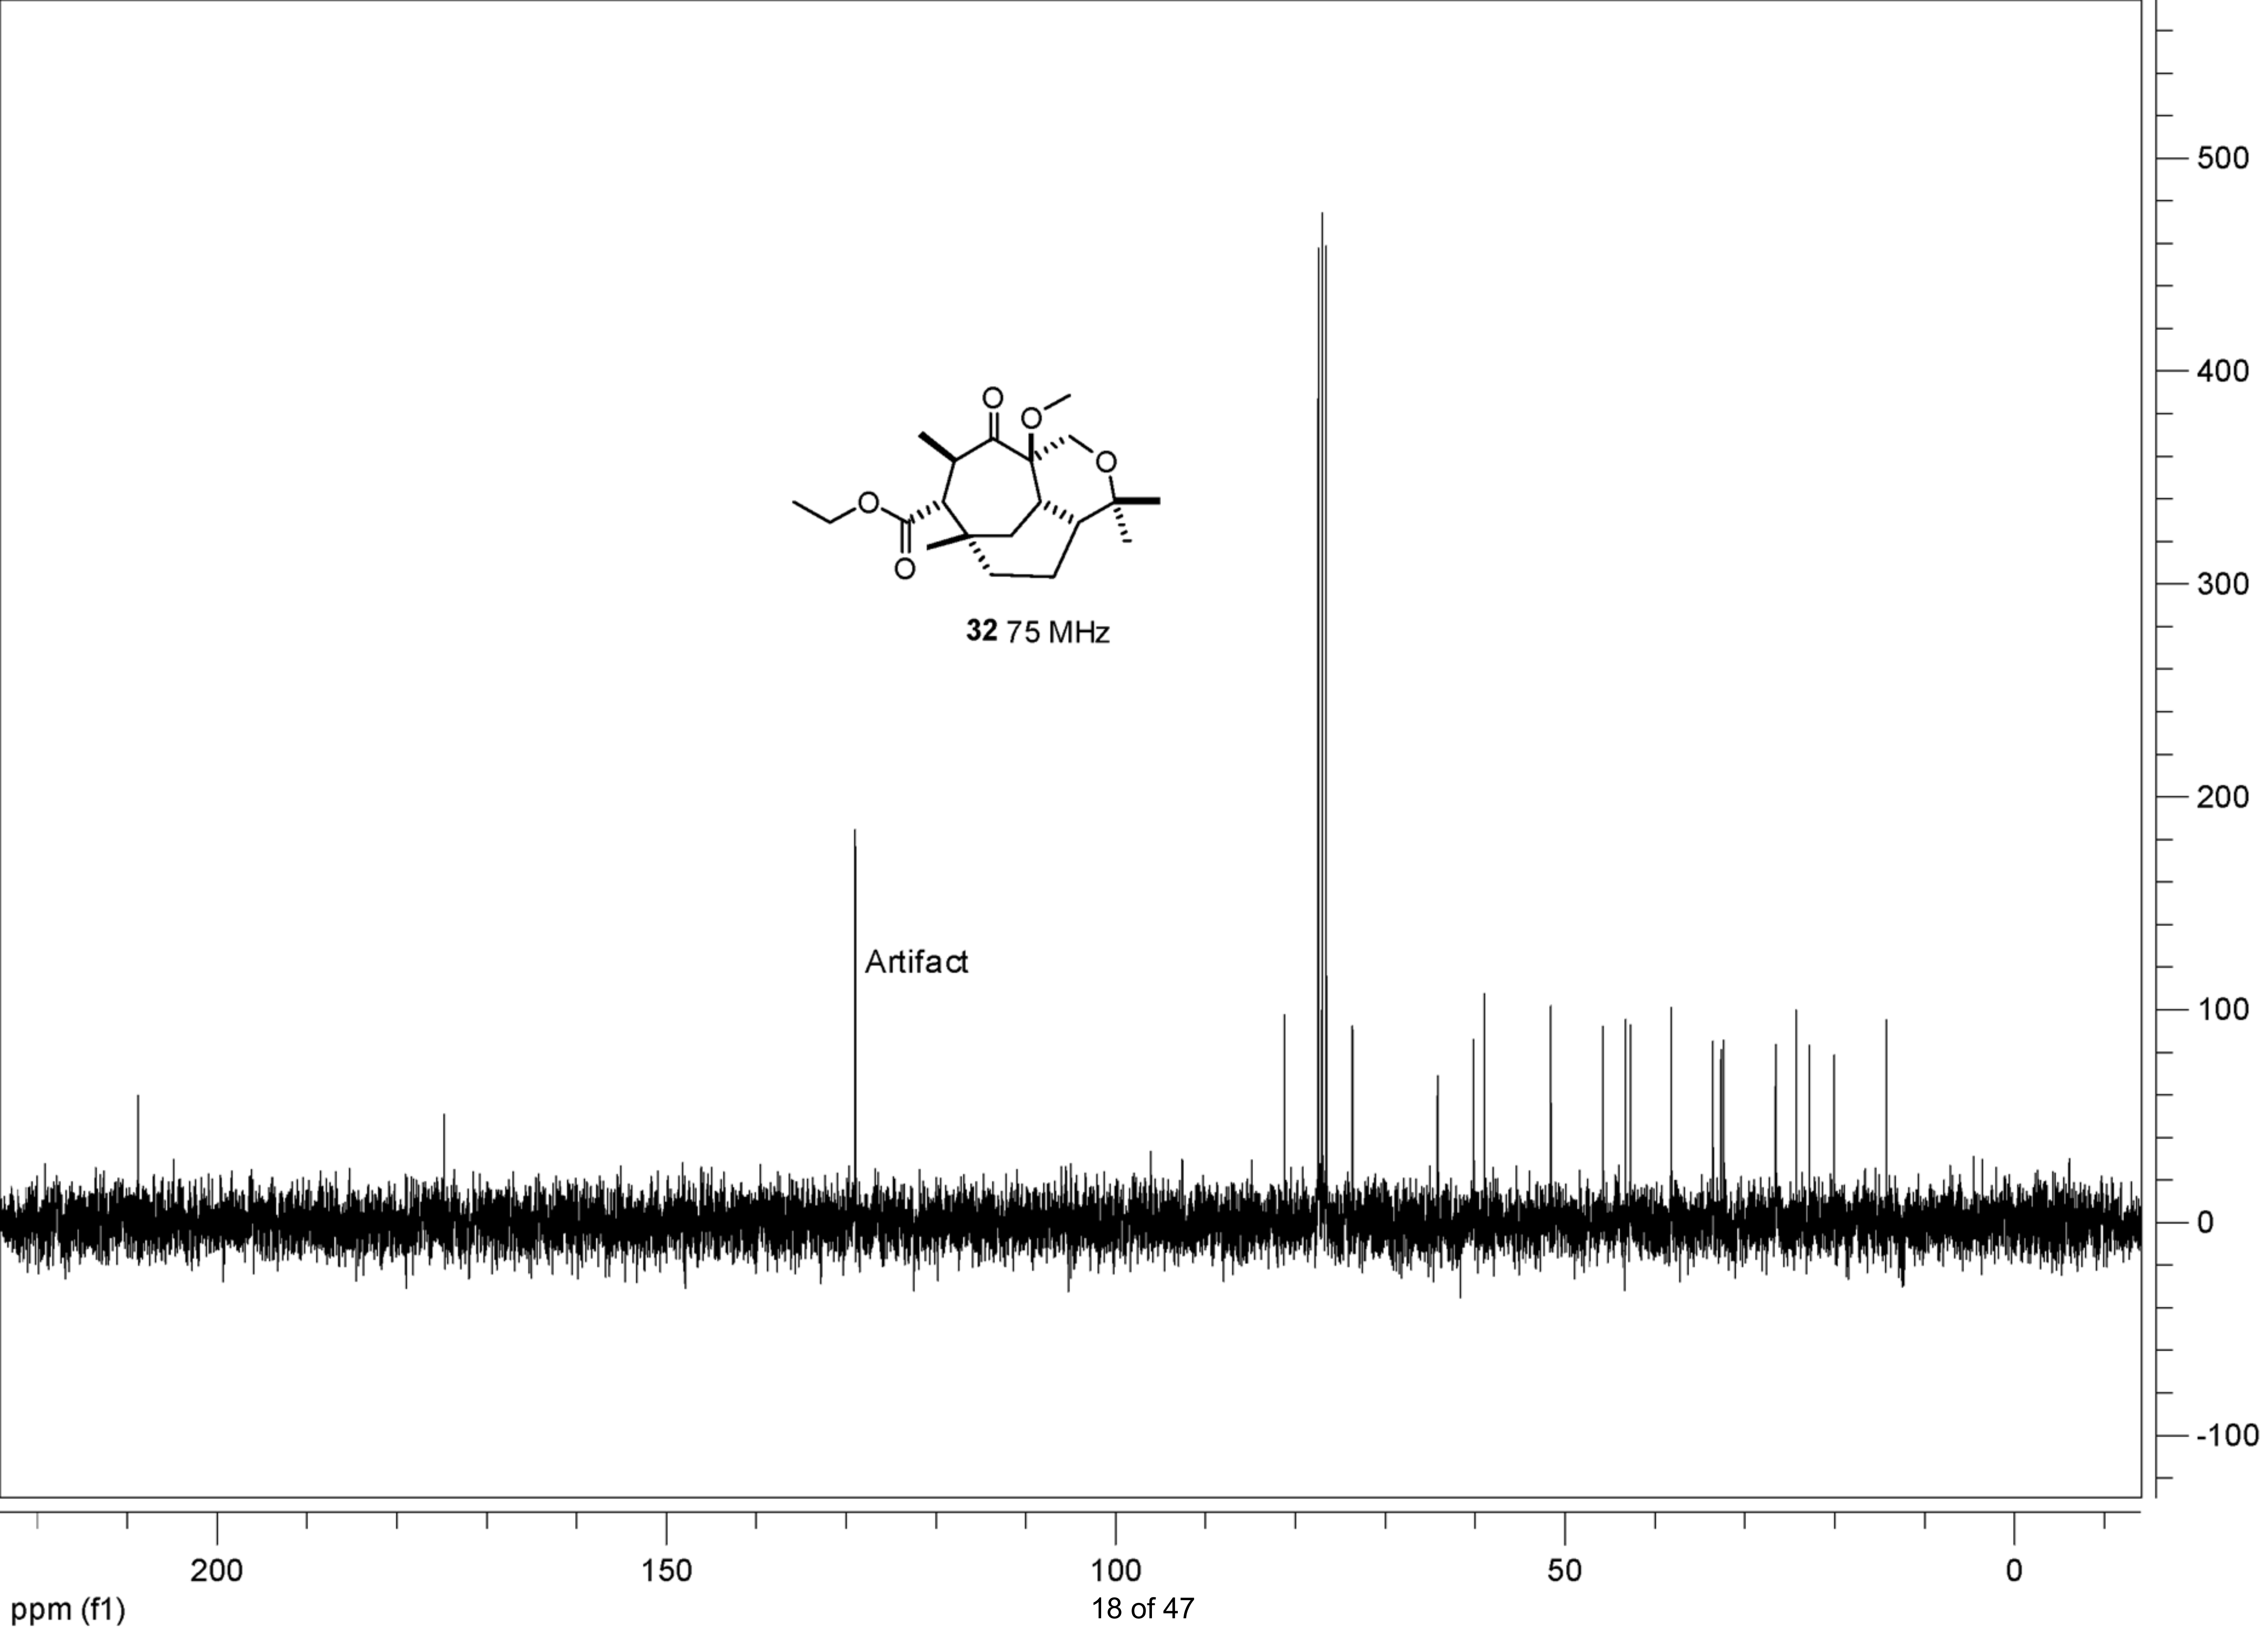

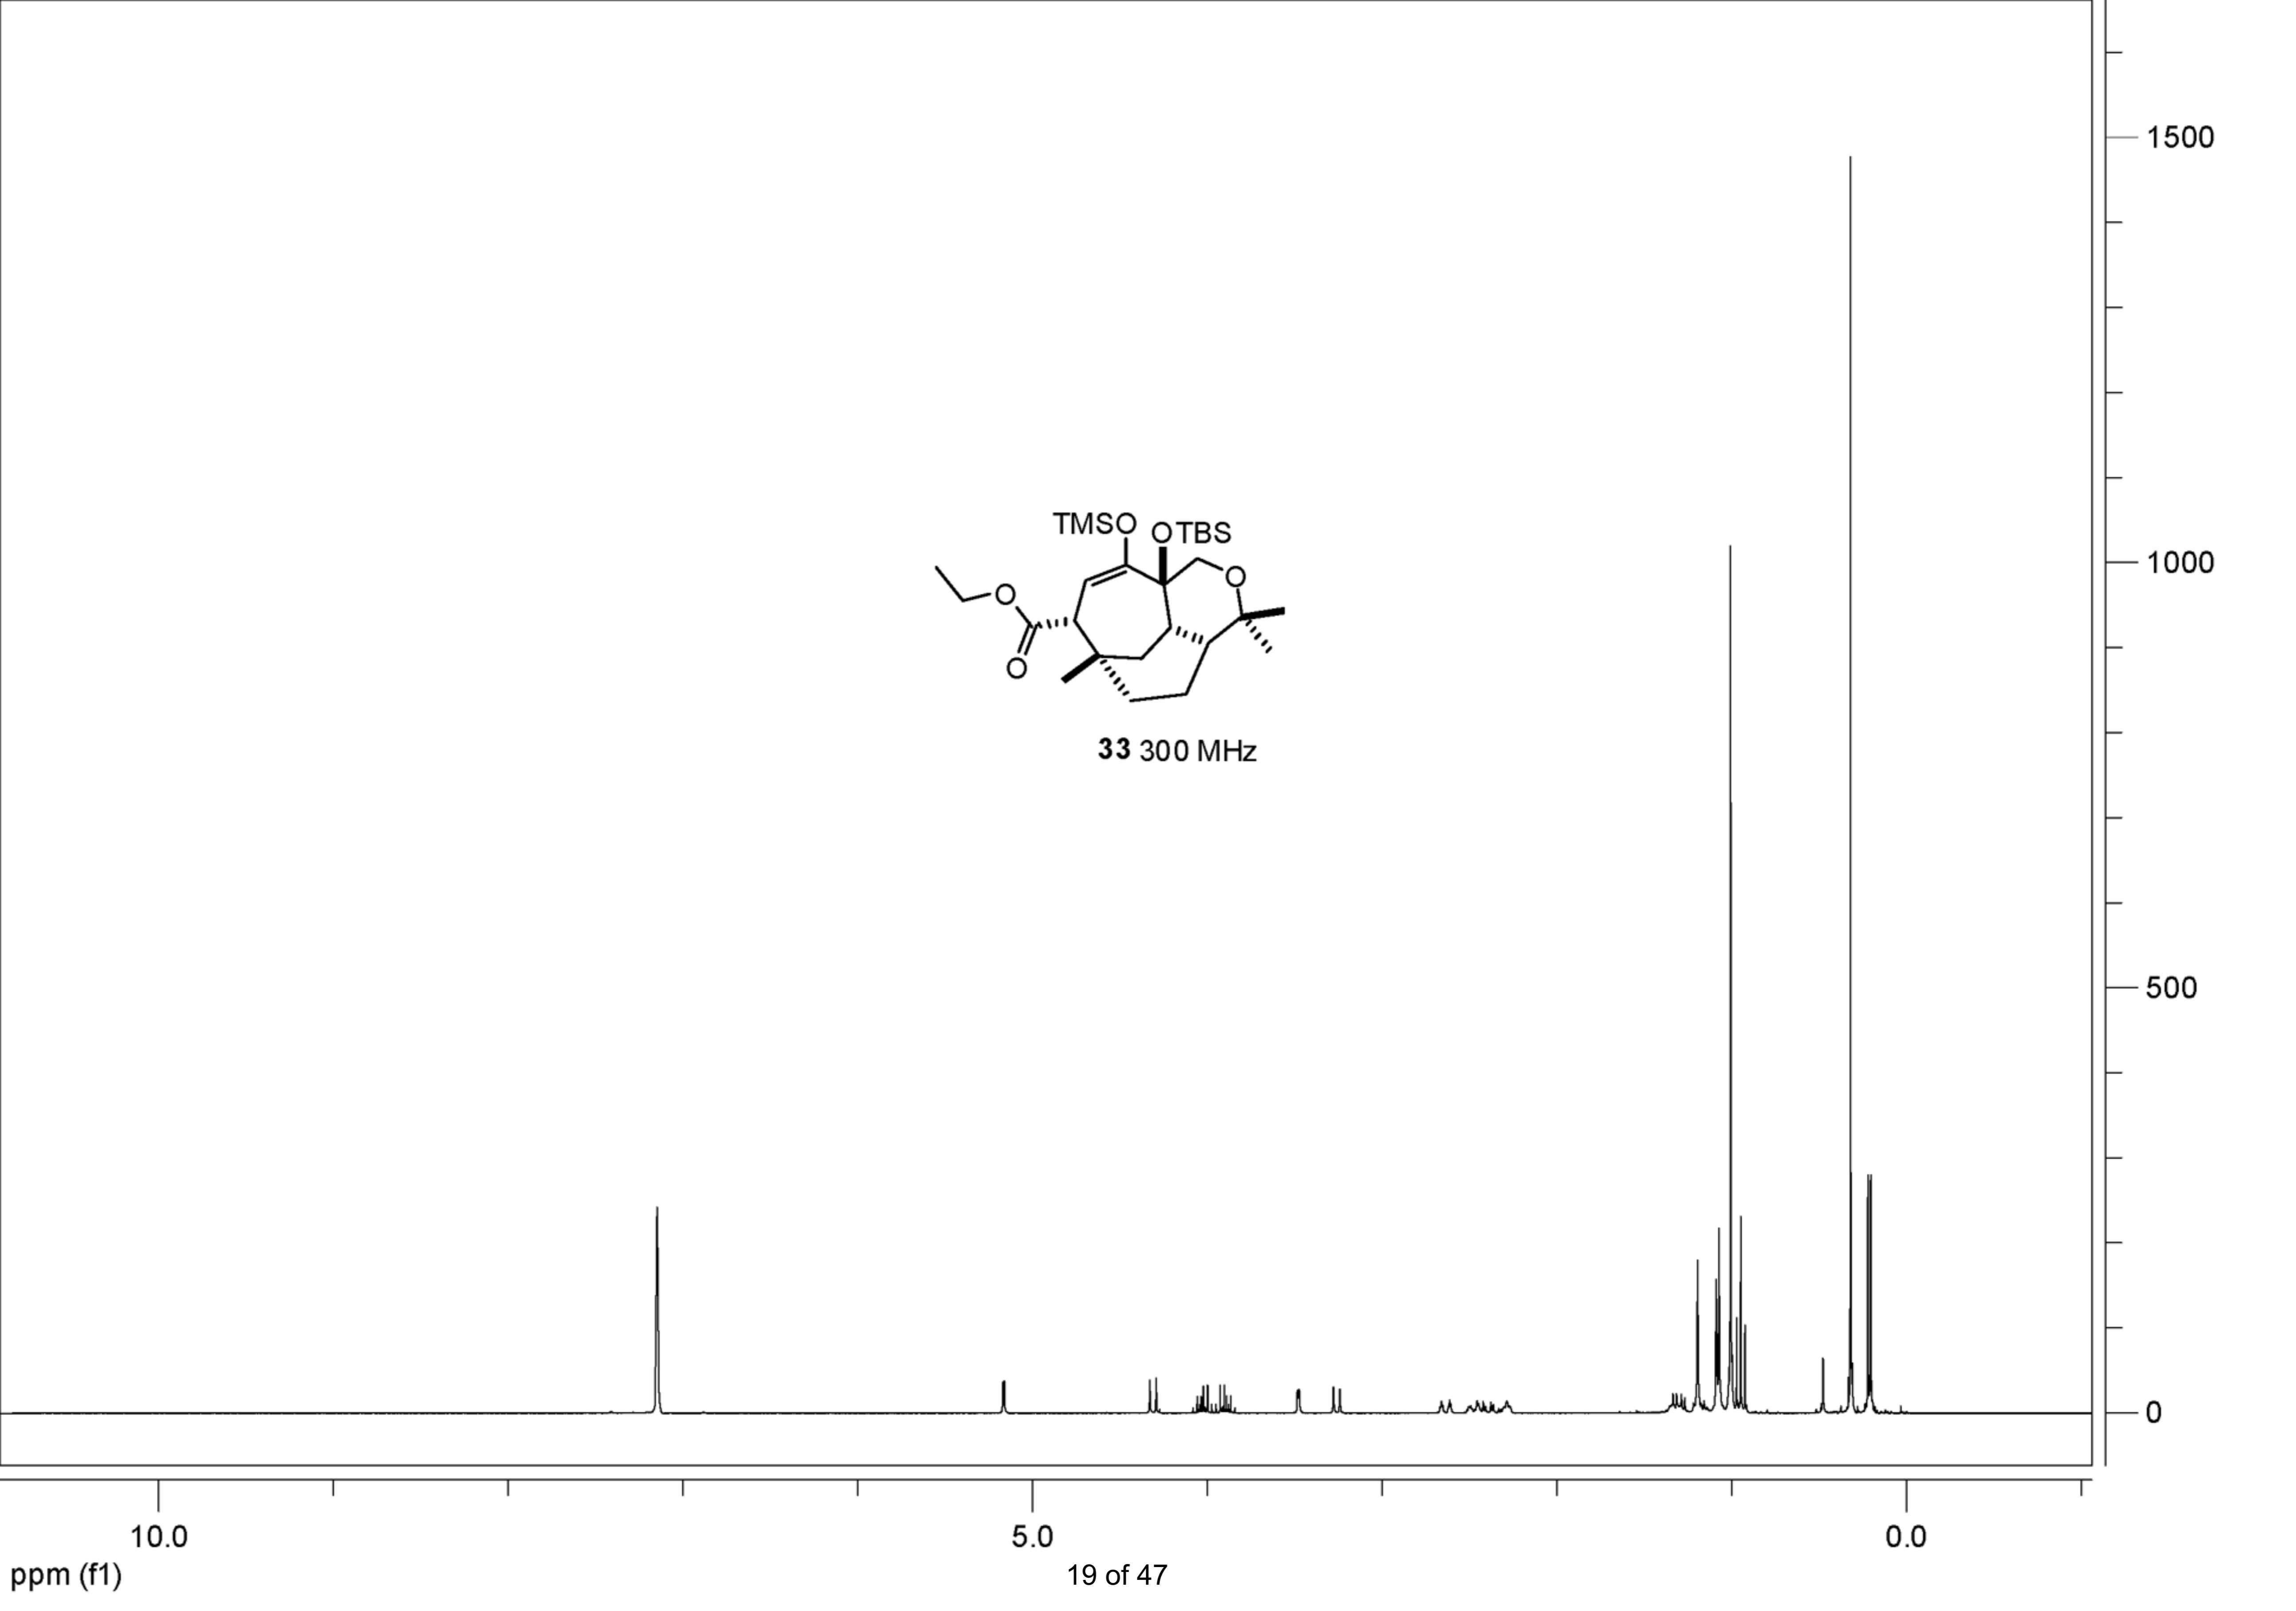

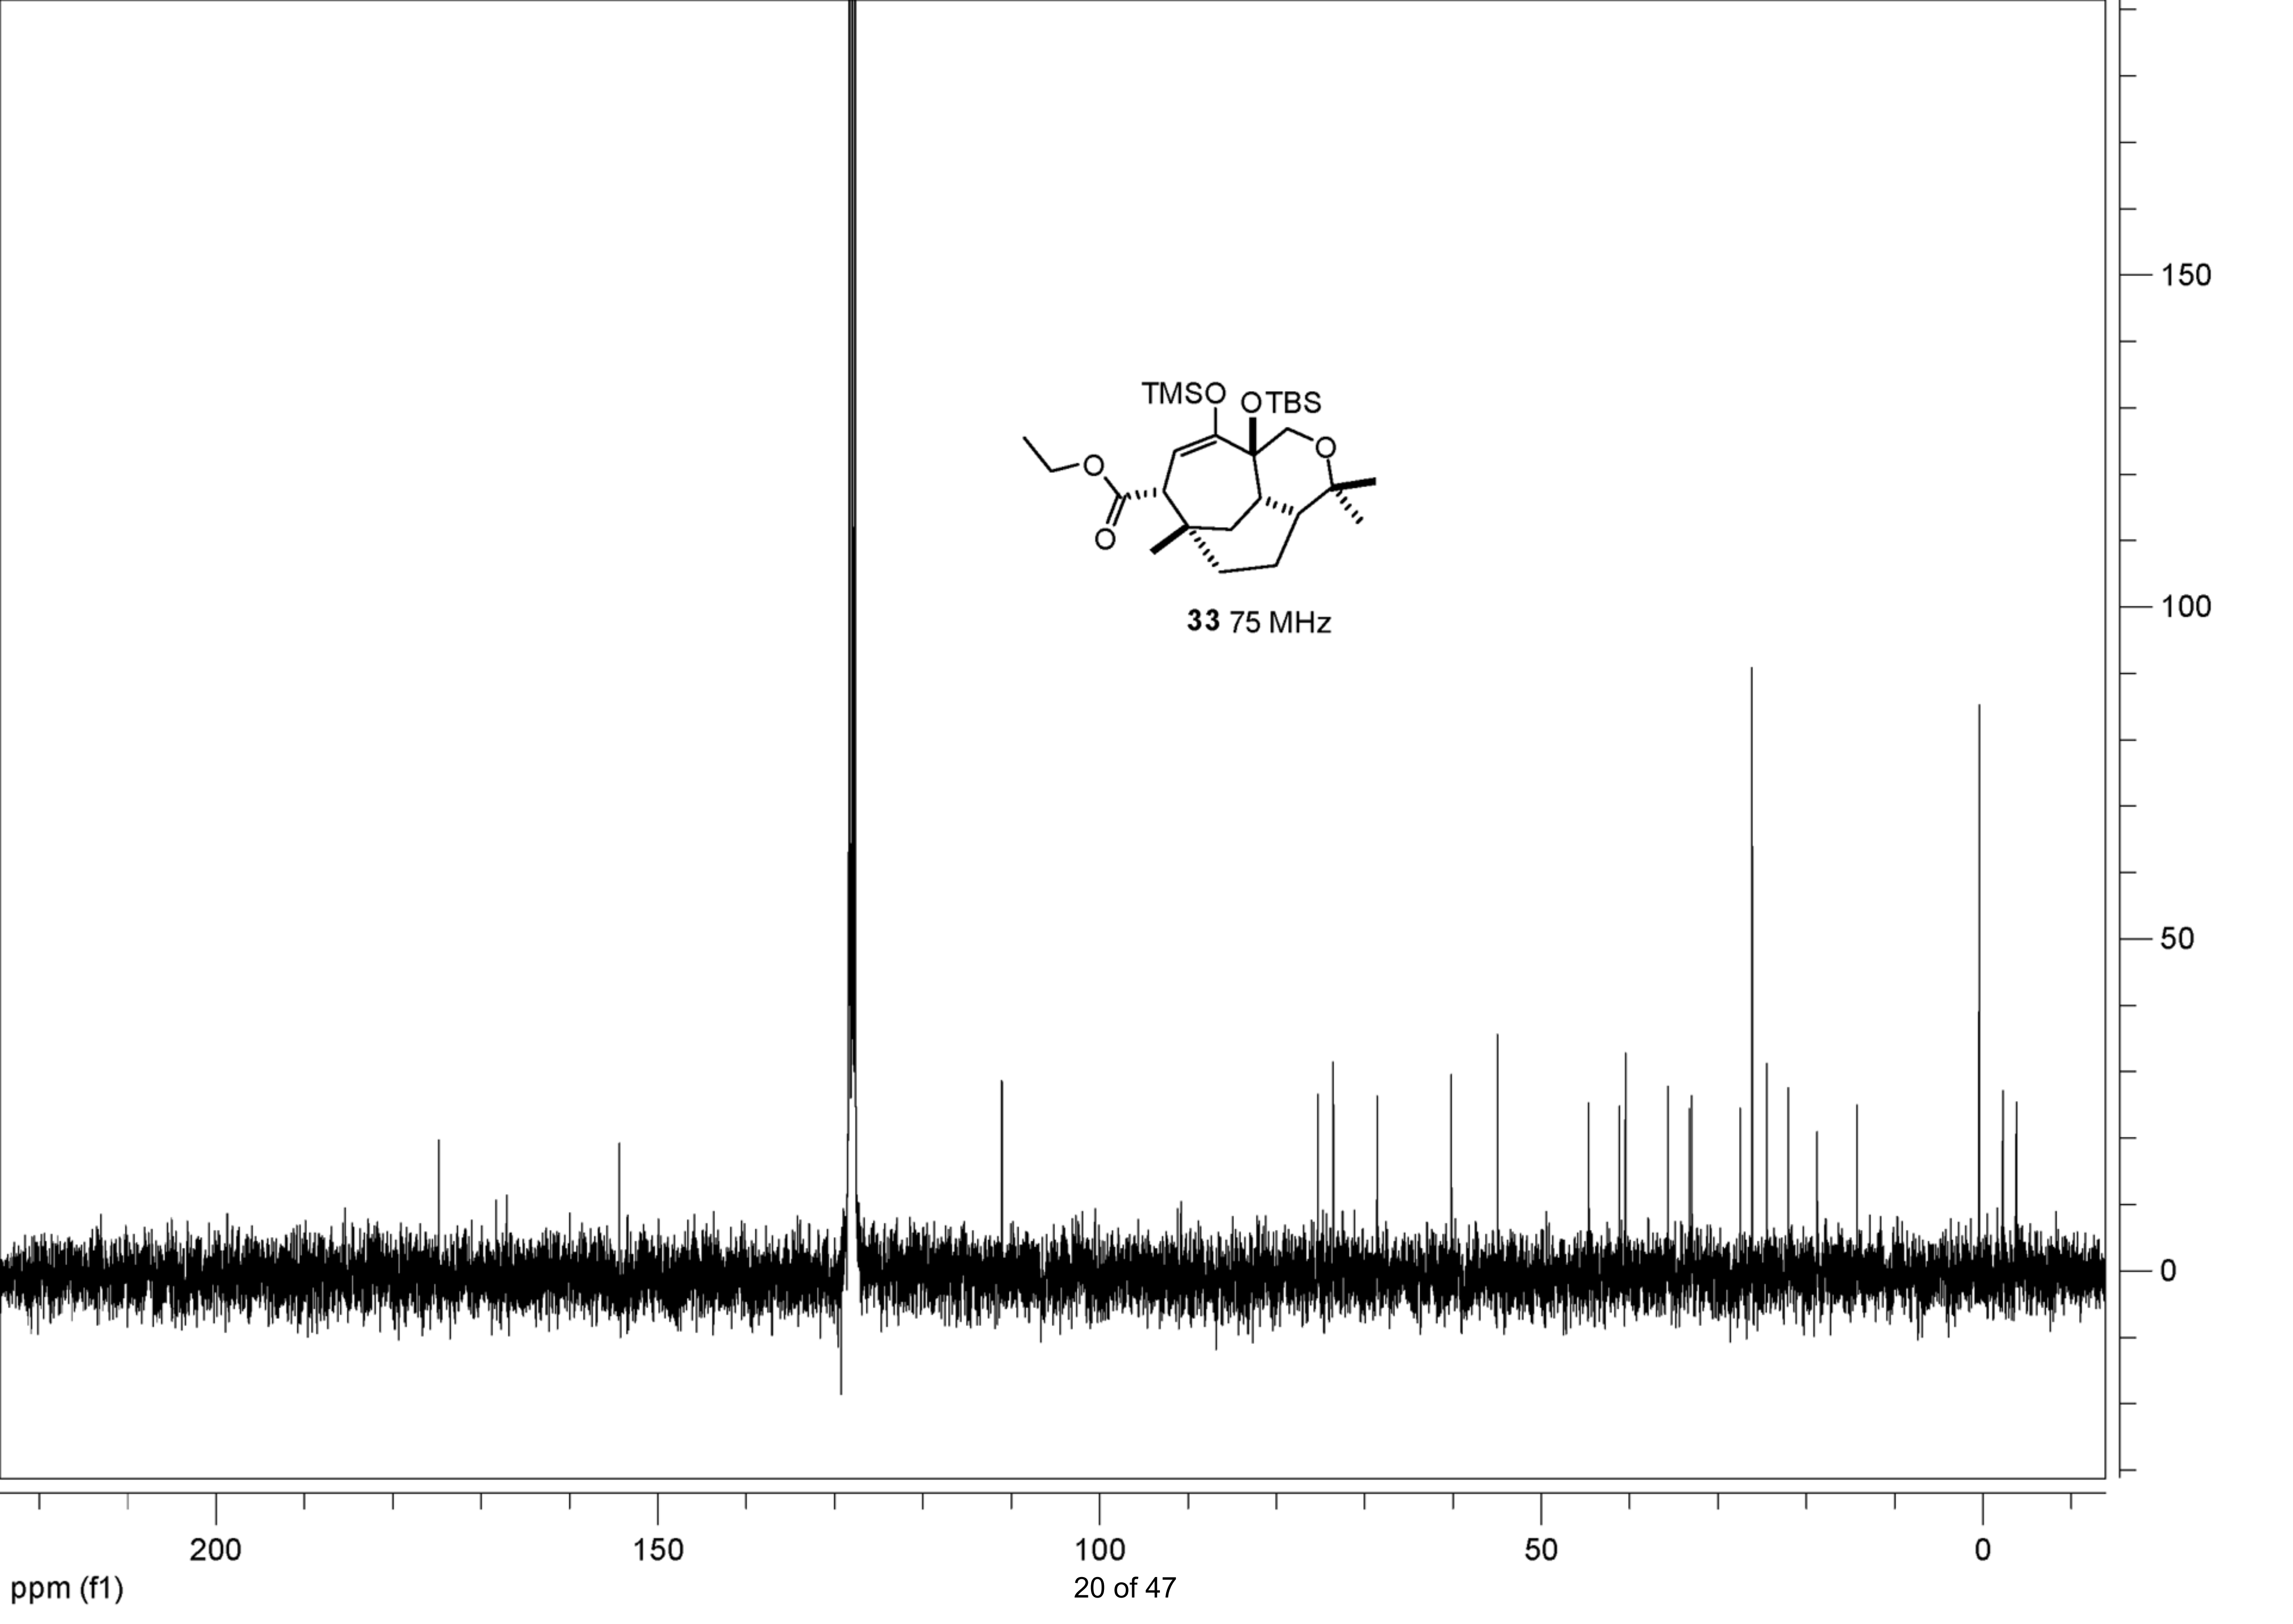

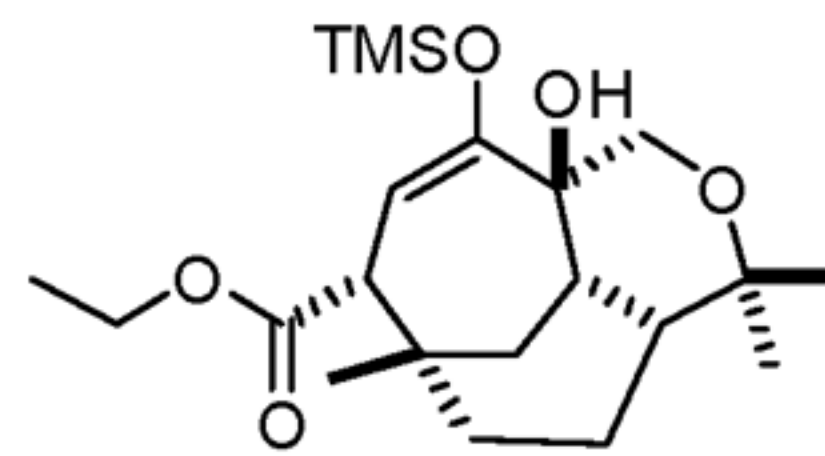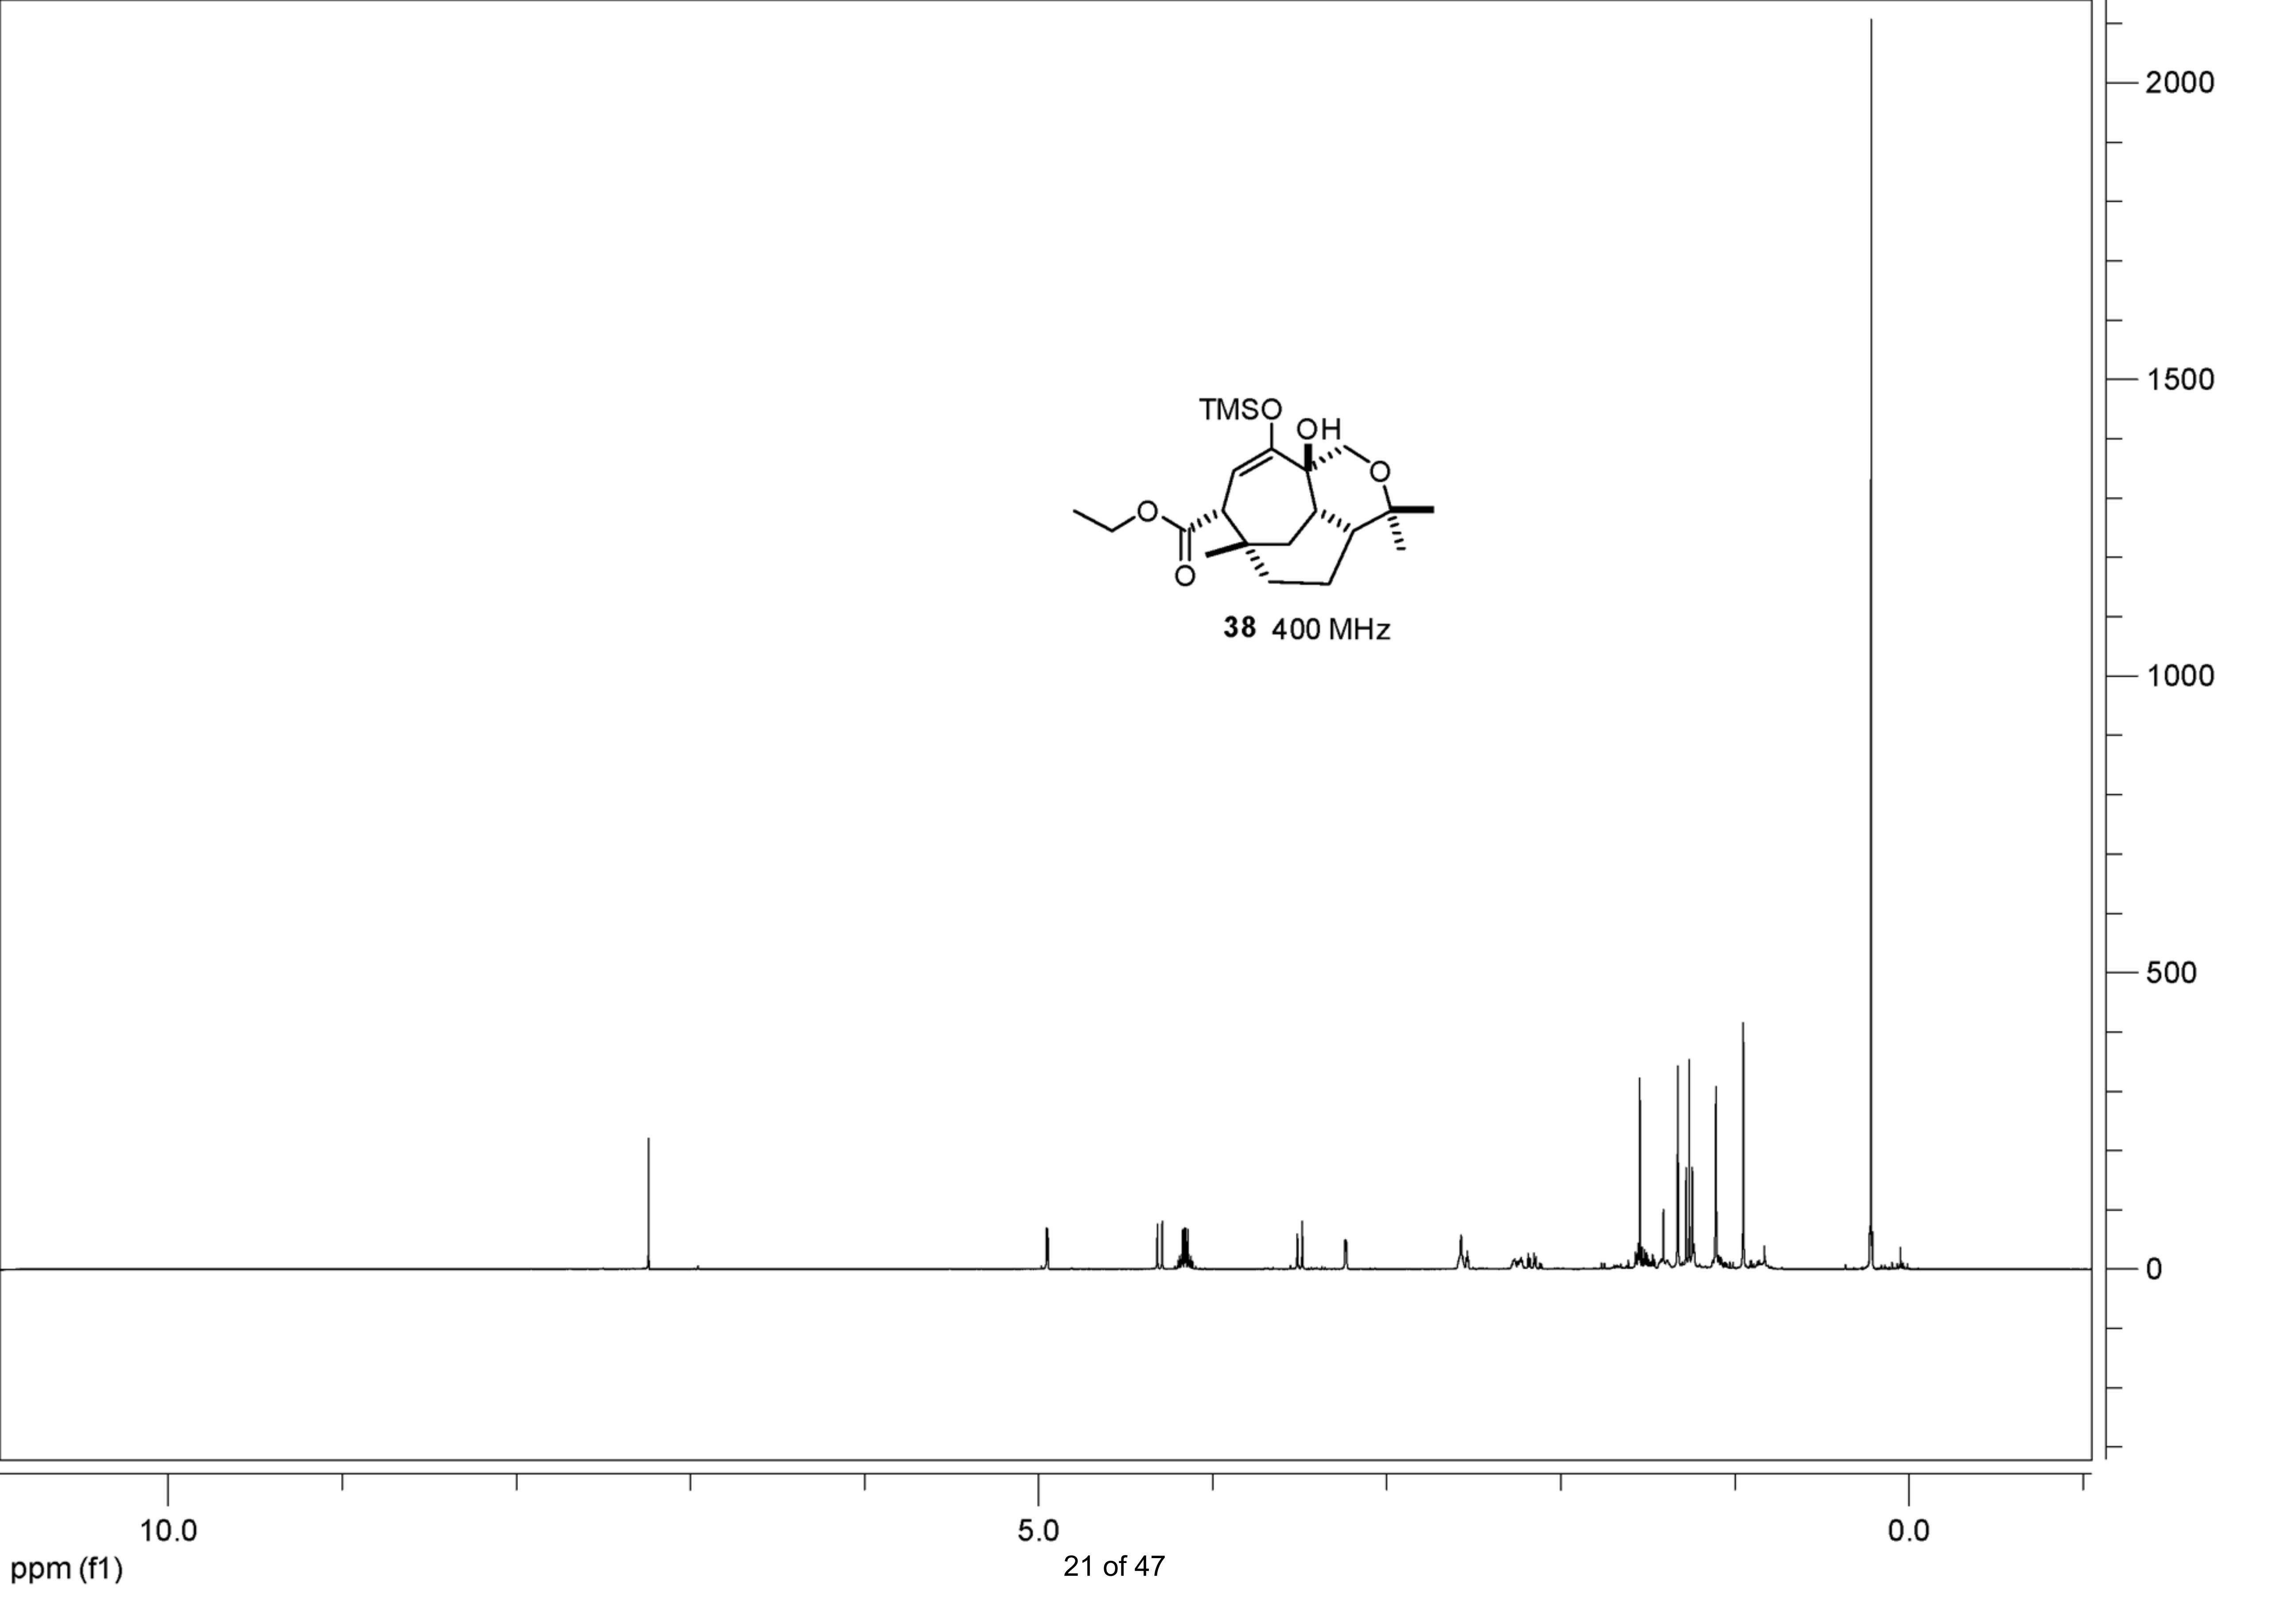

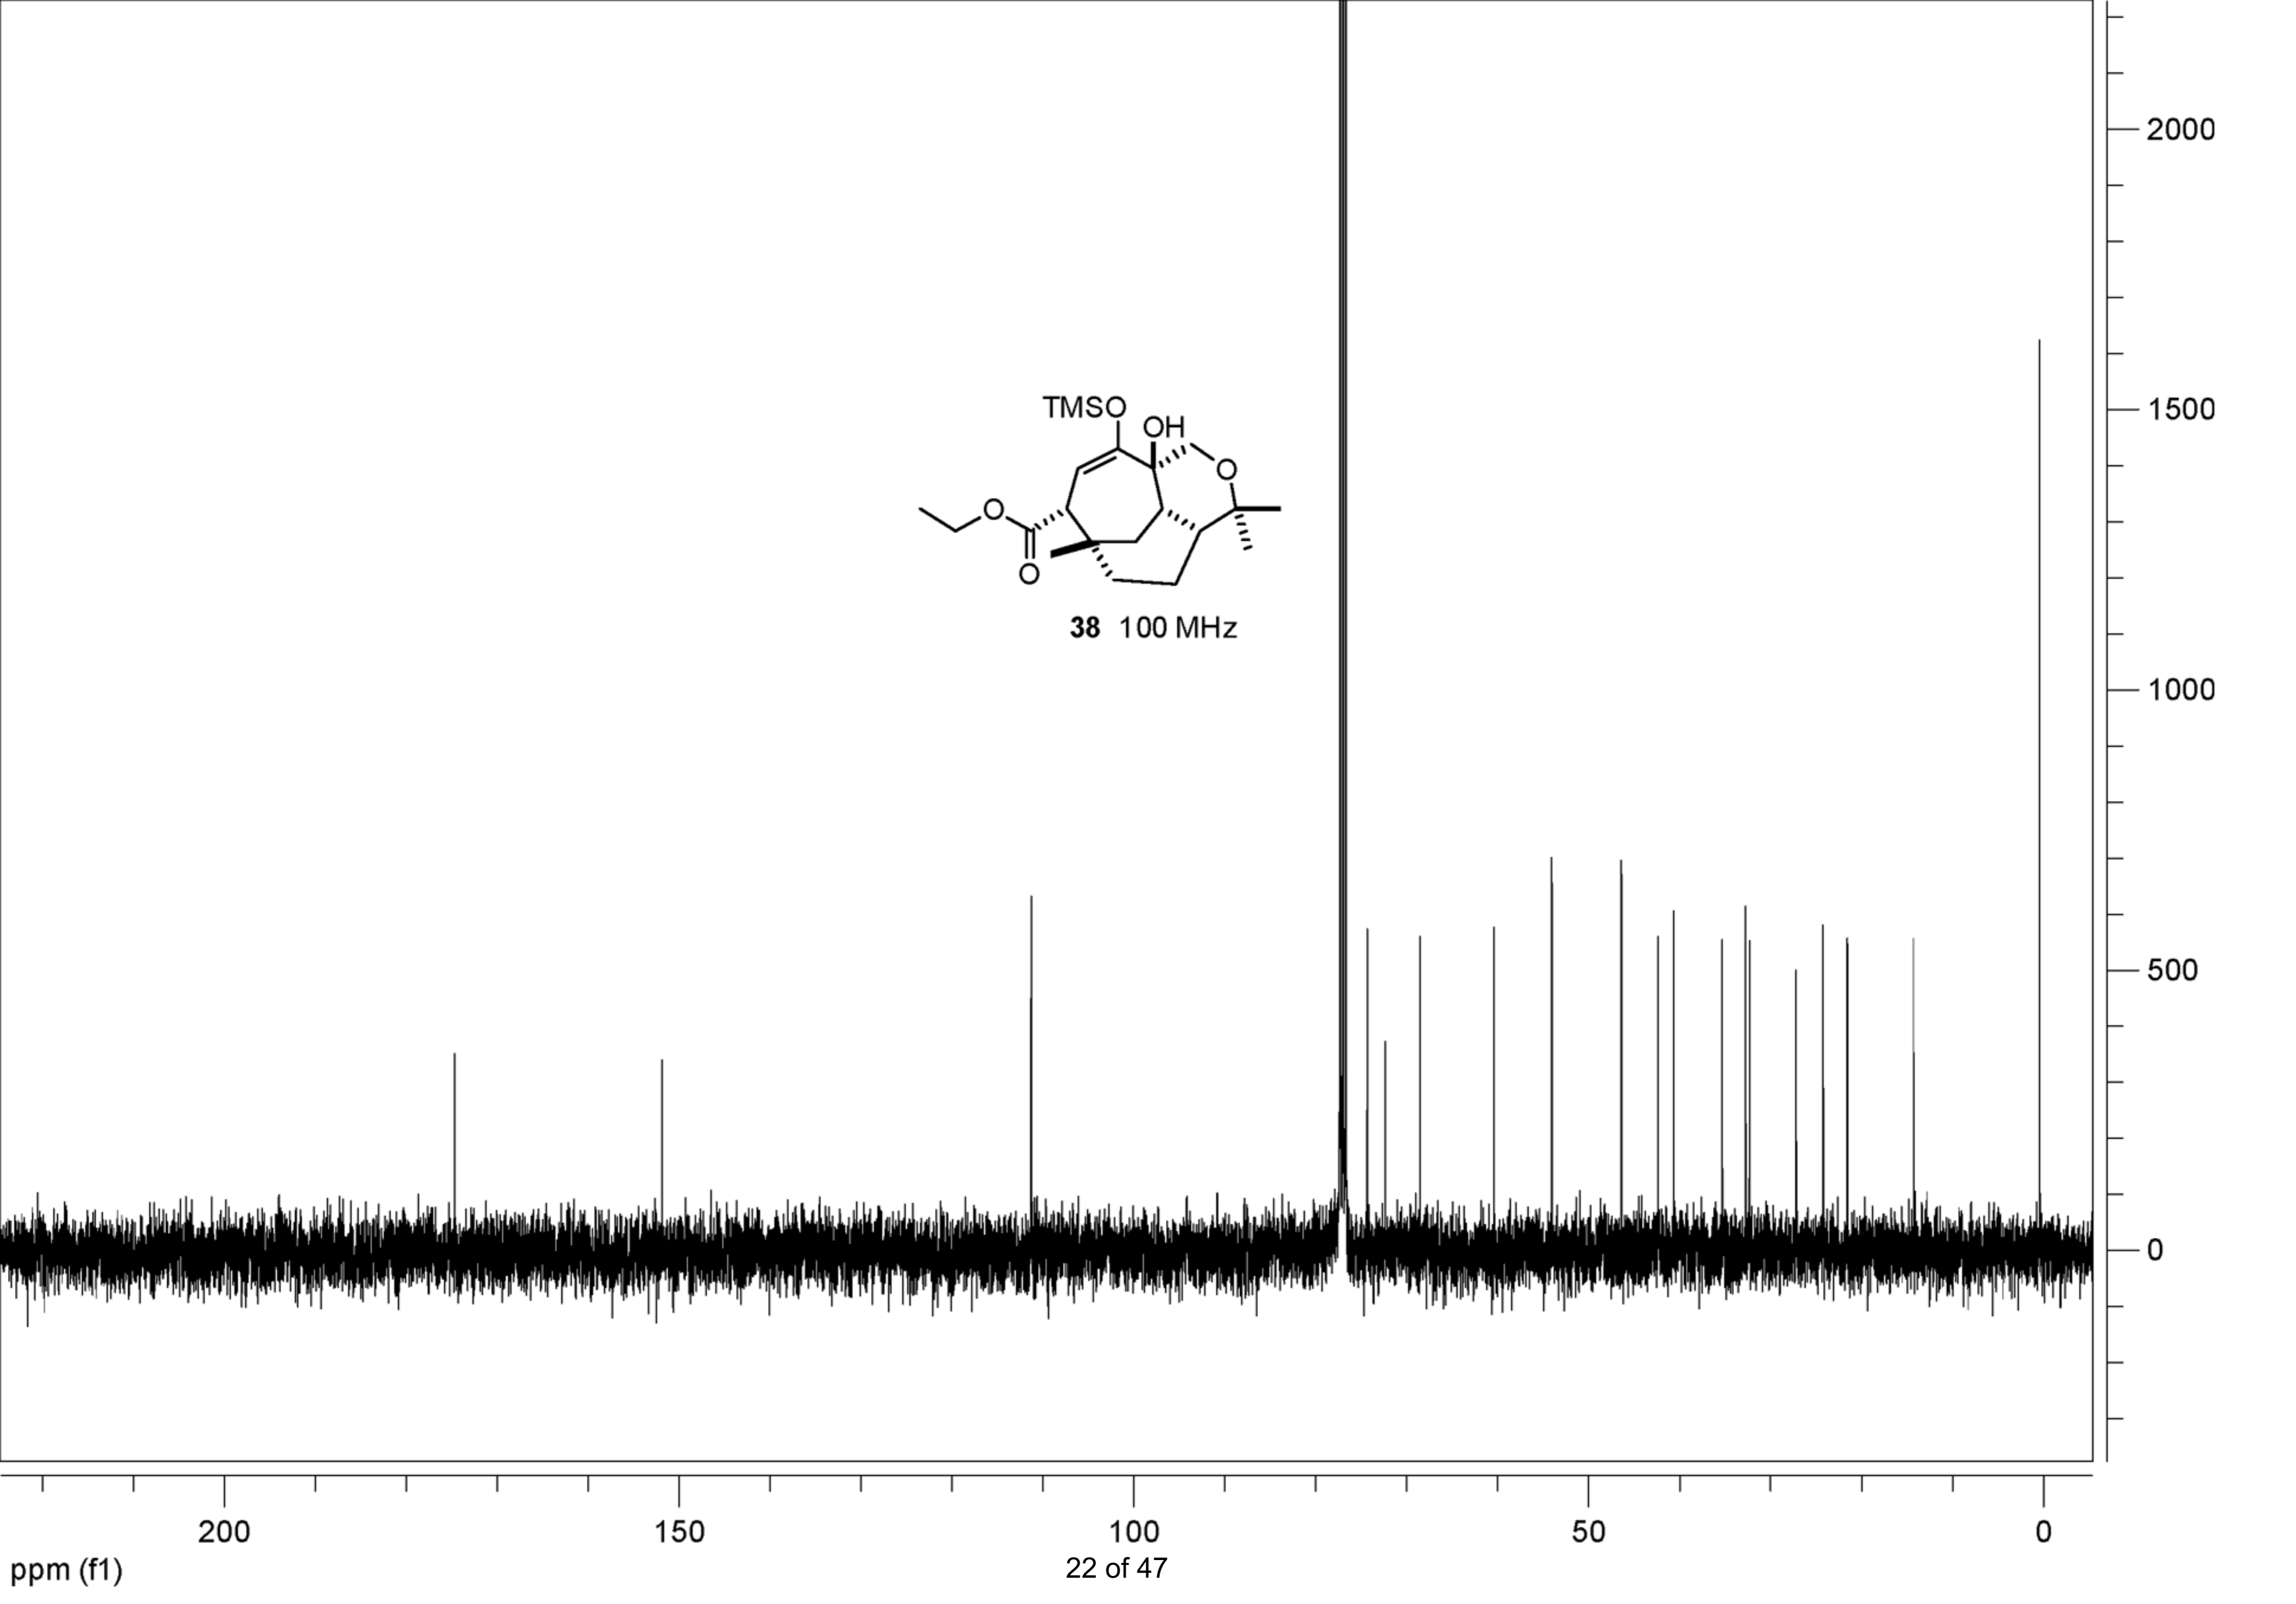

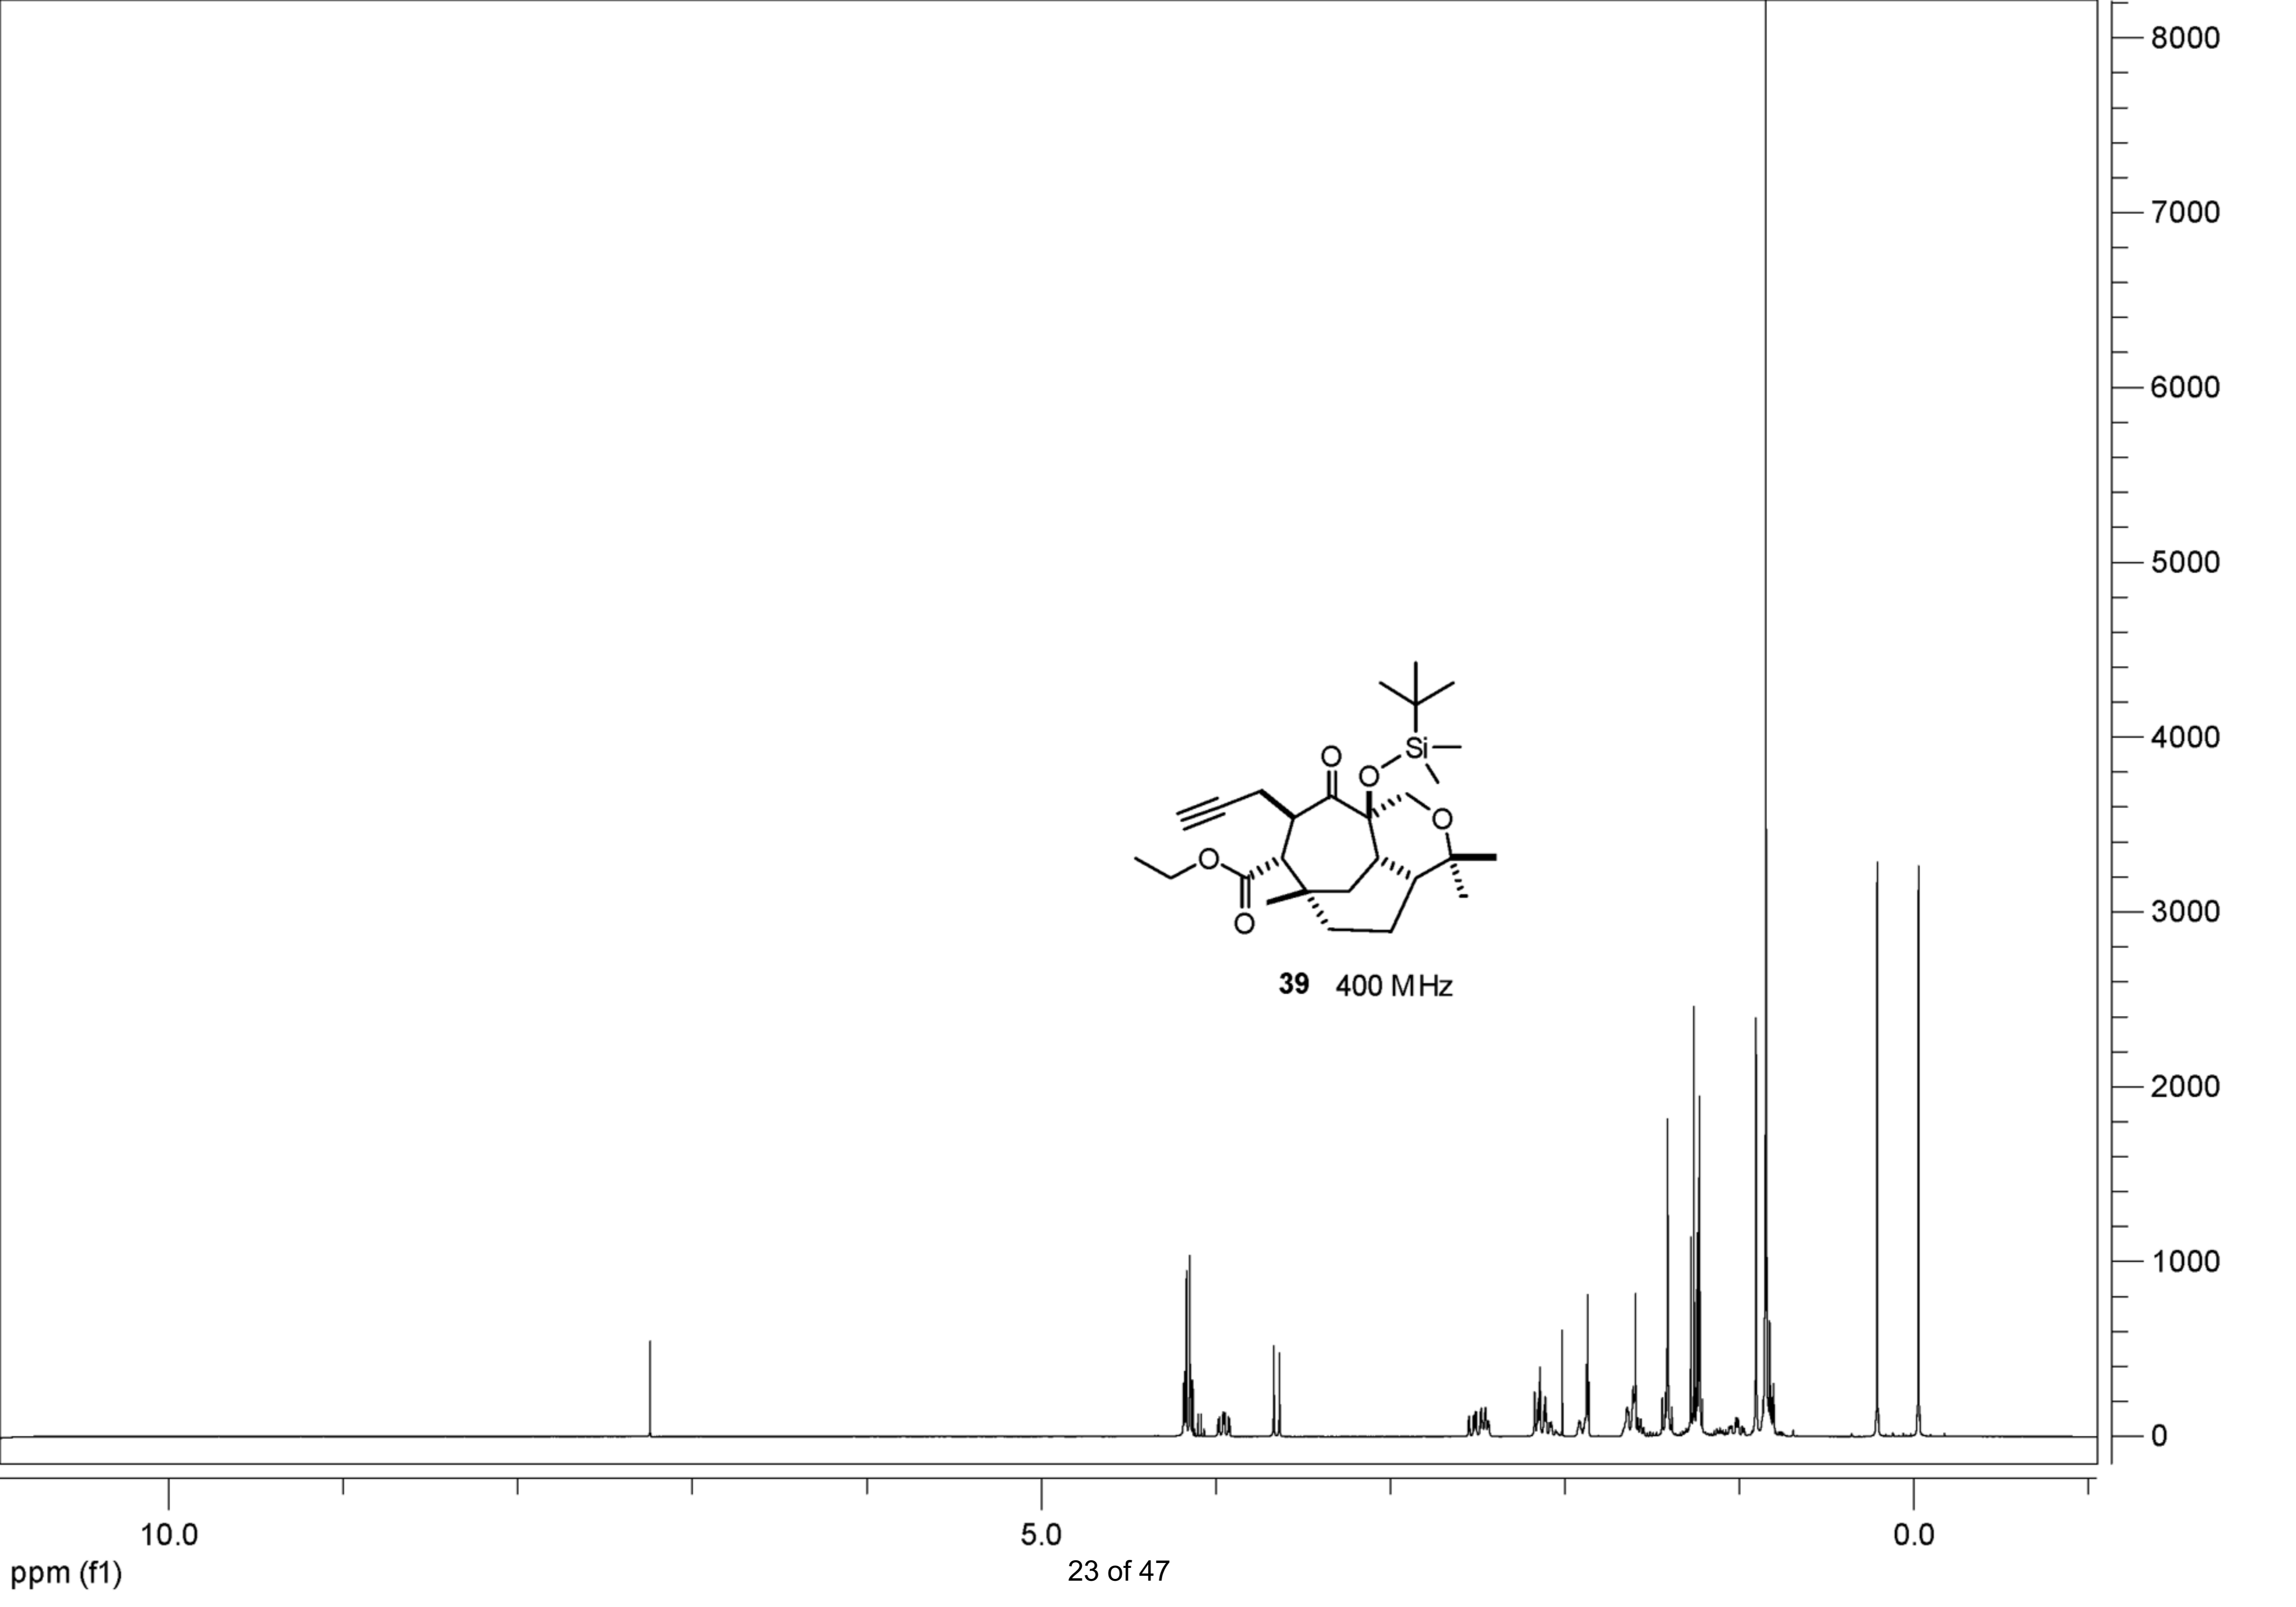





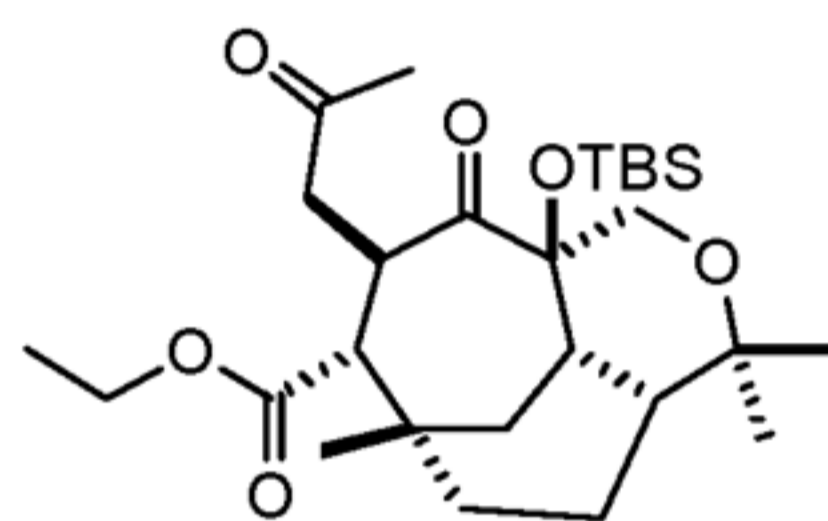

40 300 MHz

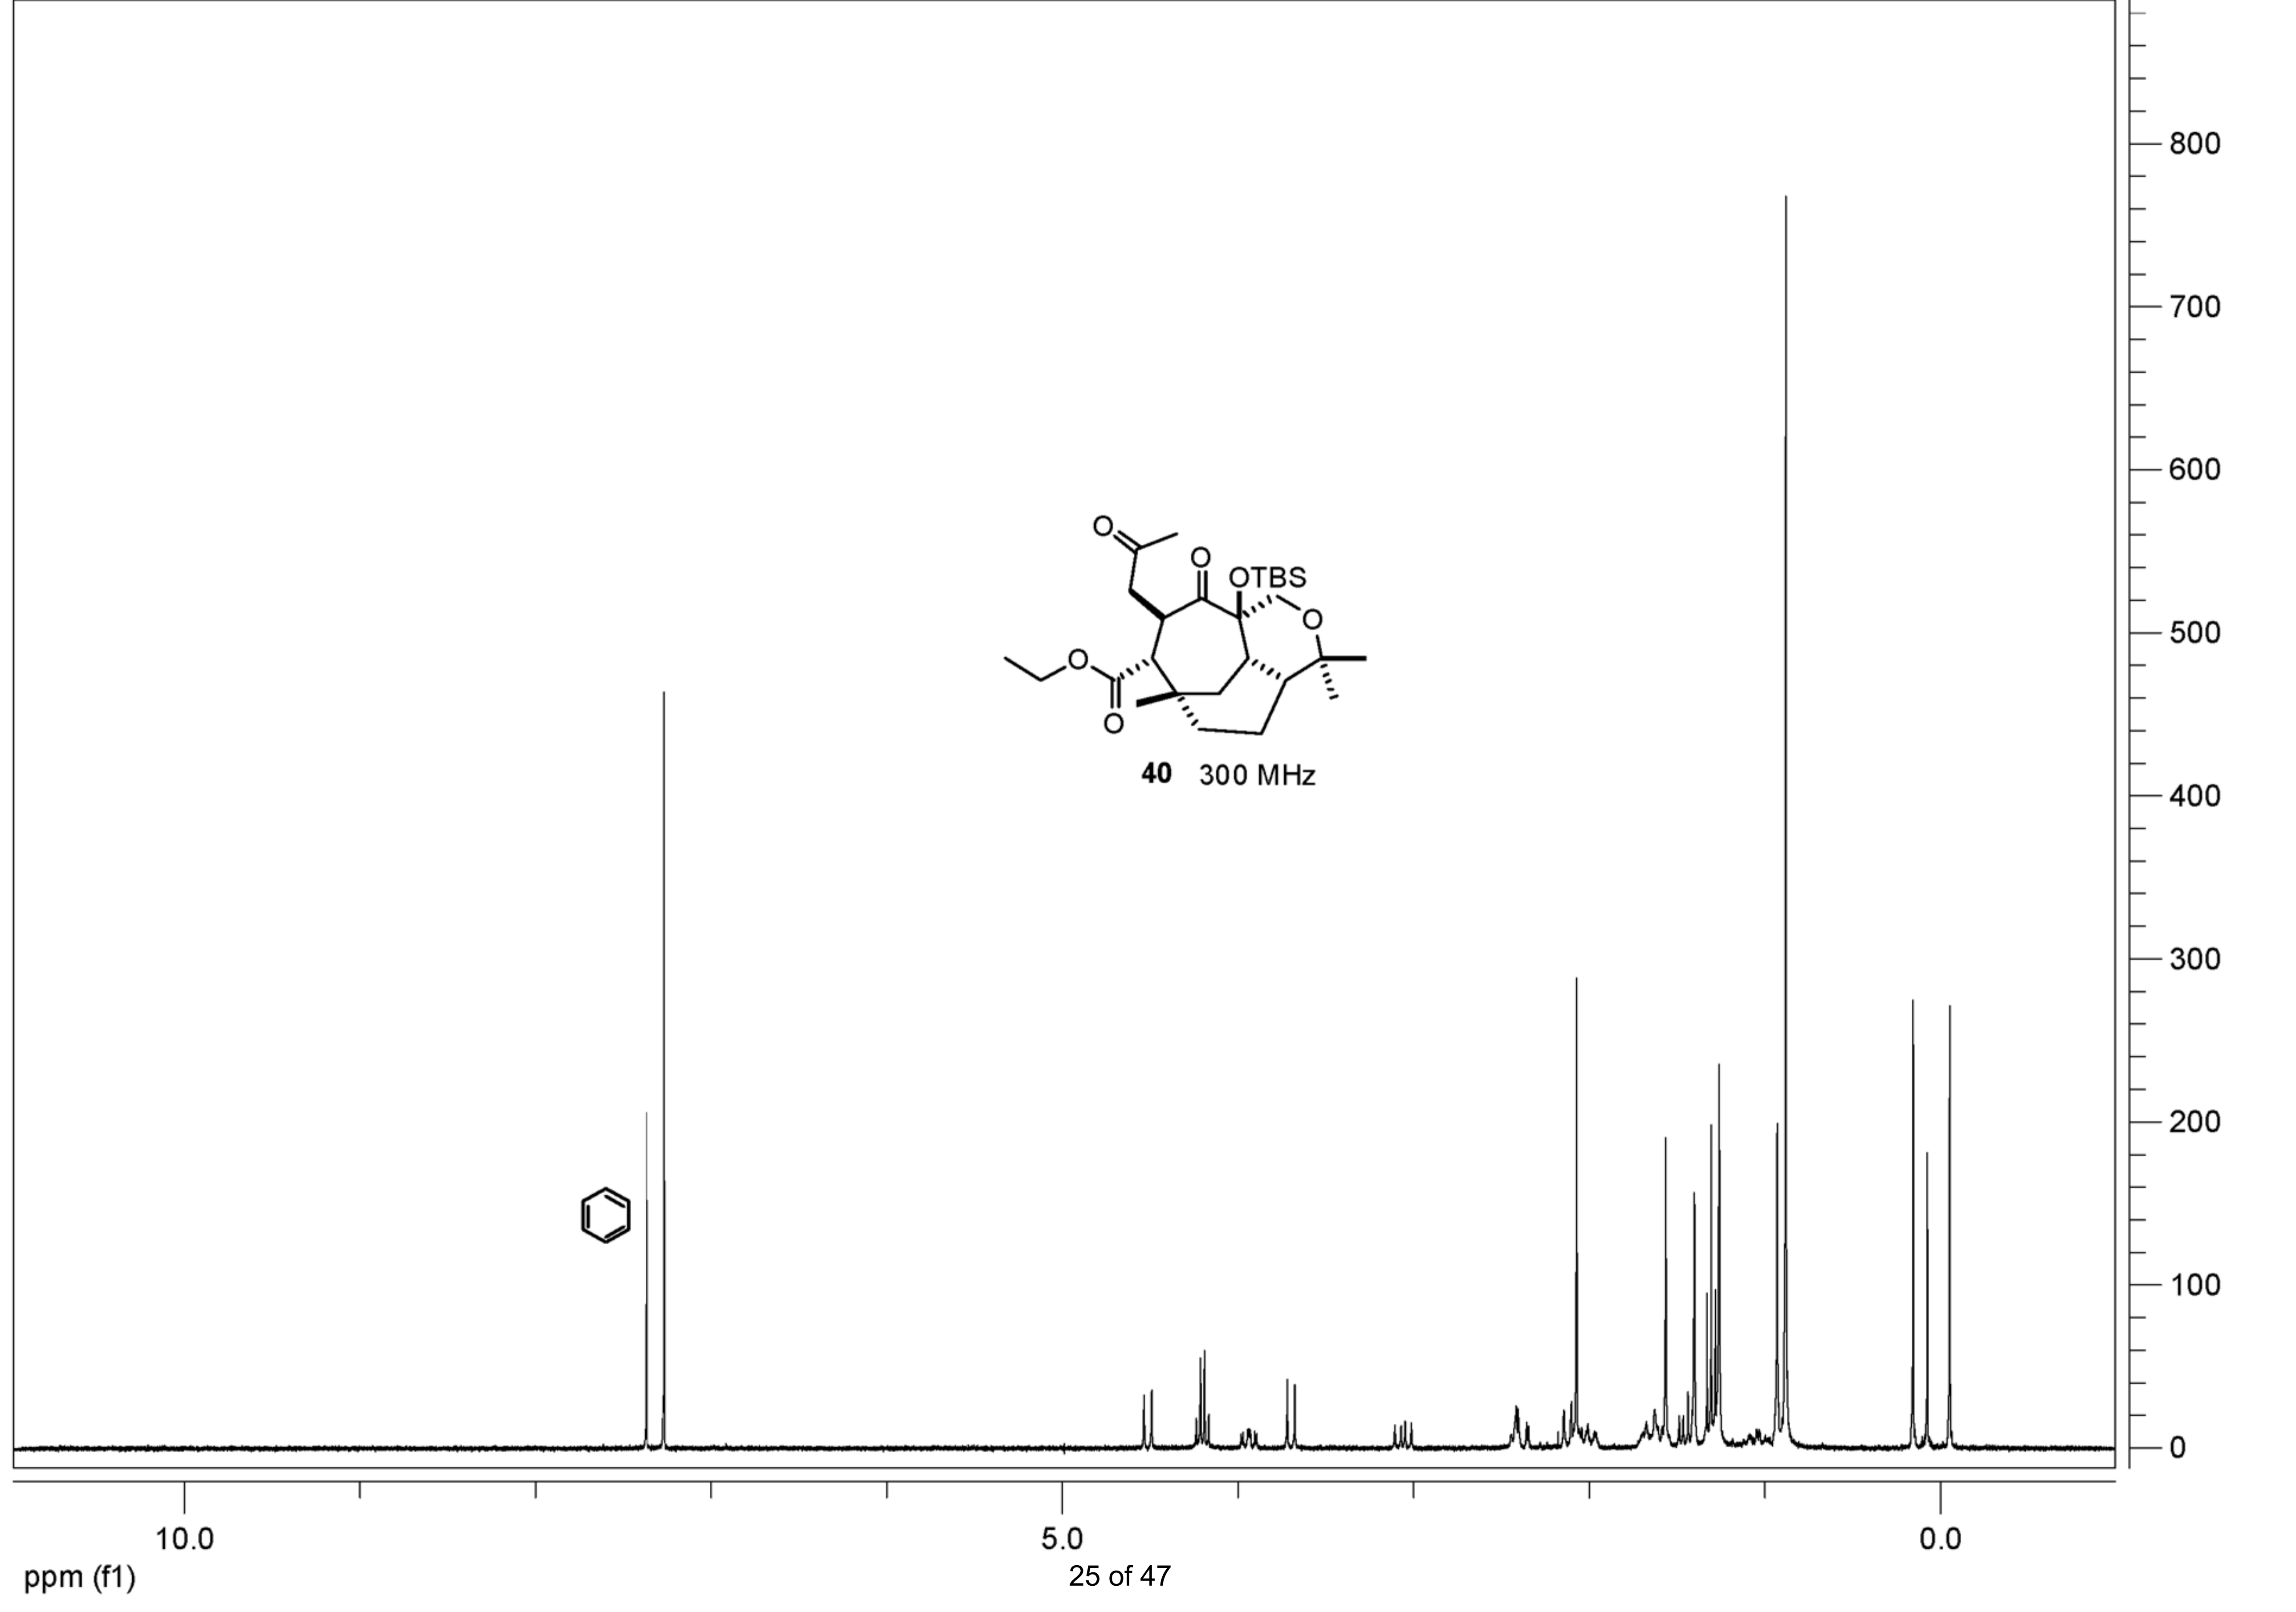

10.0

5.0

0.0

ppm (f1)

25 of 47

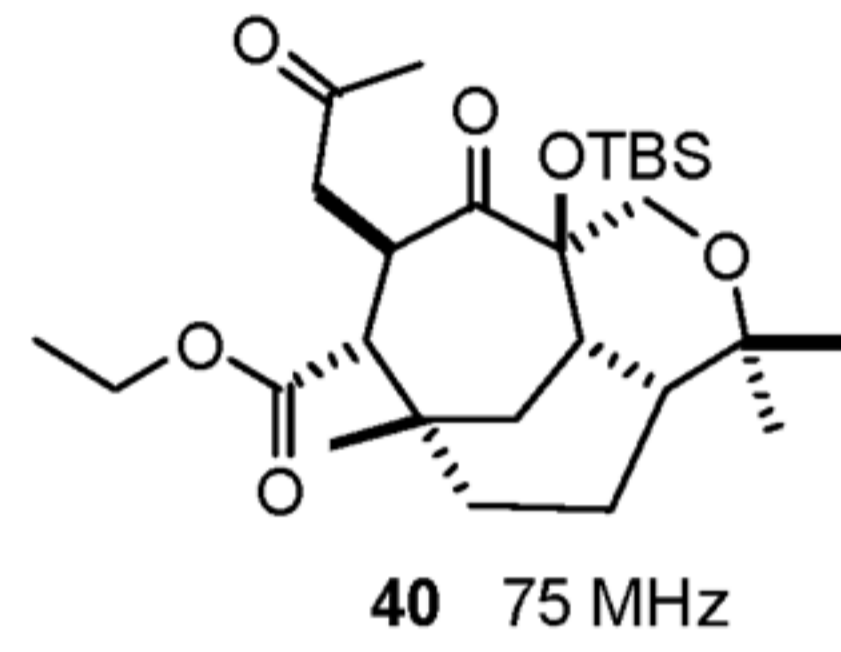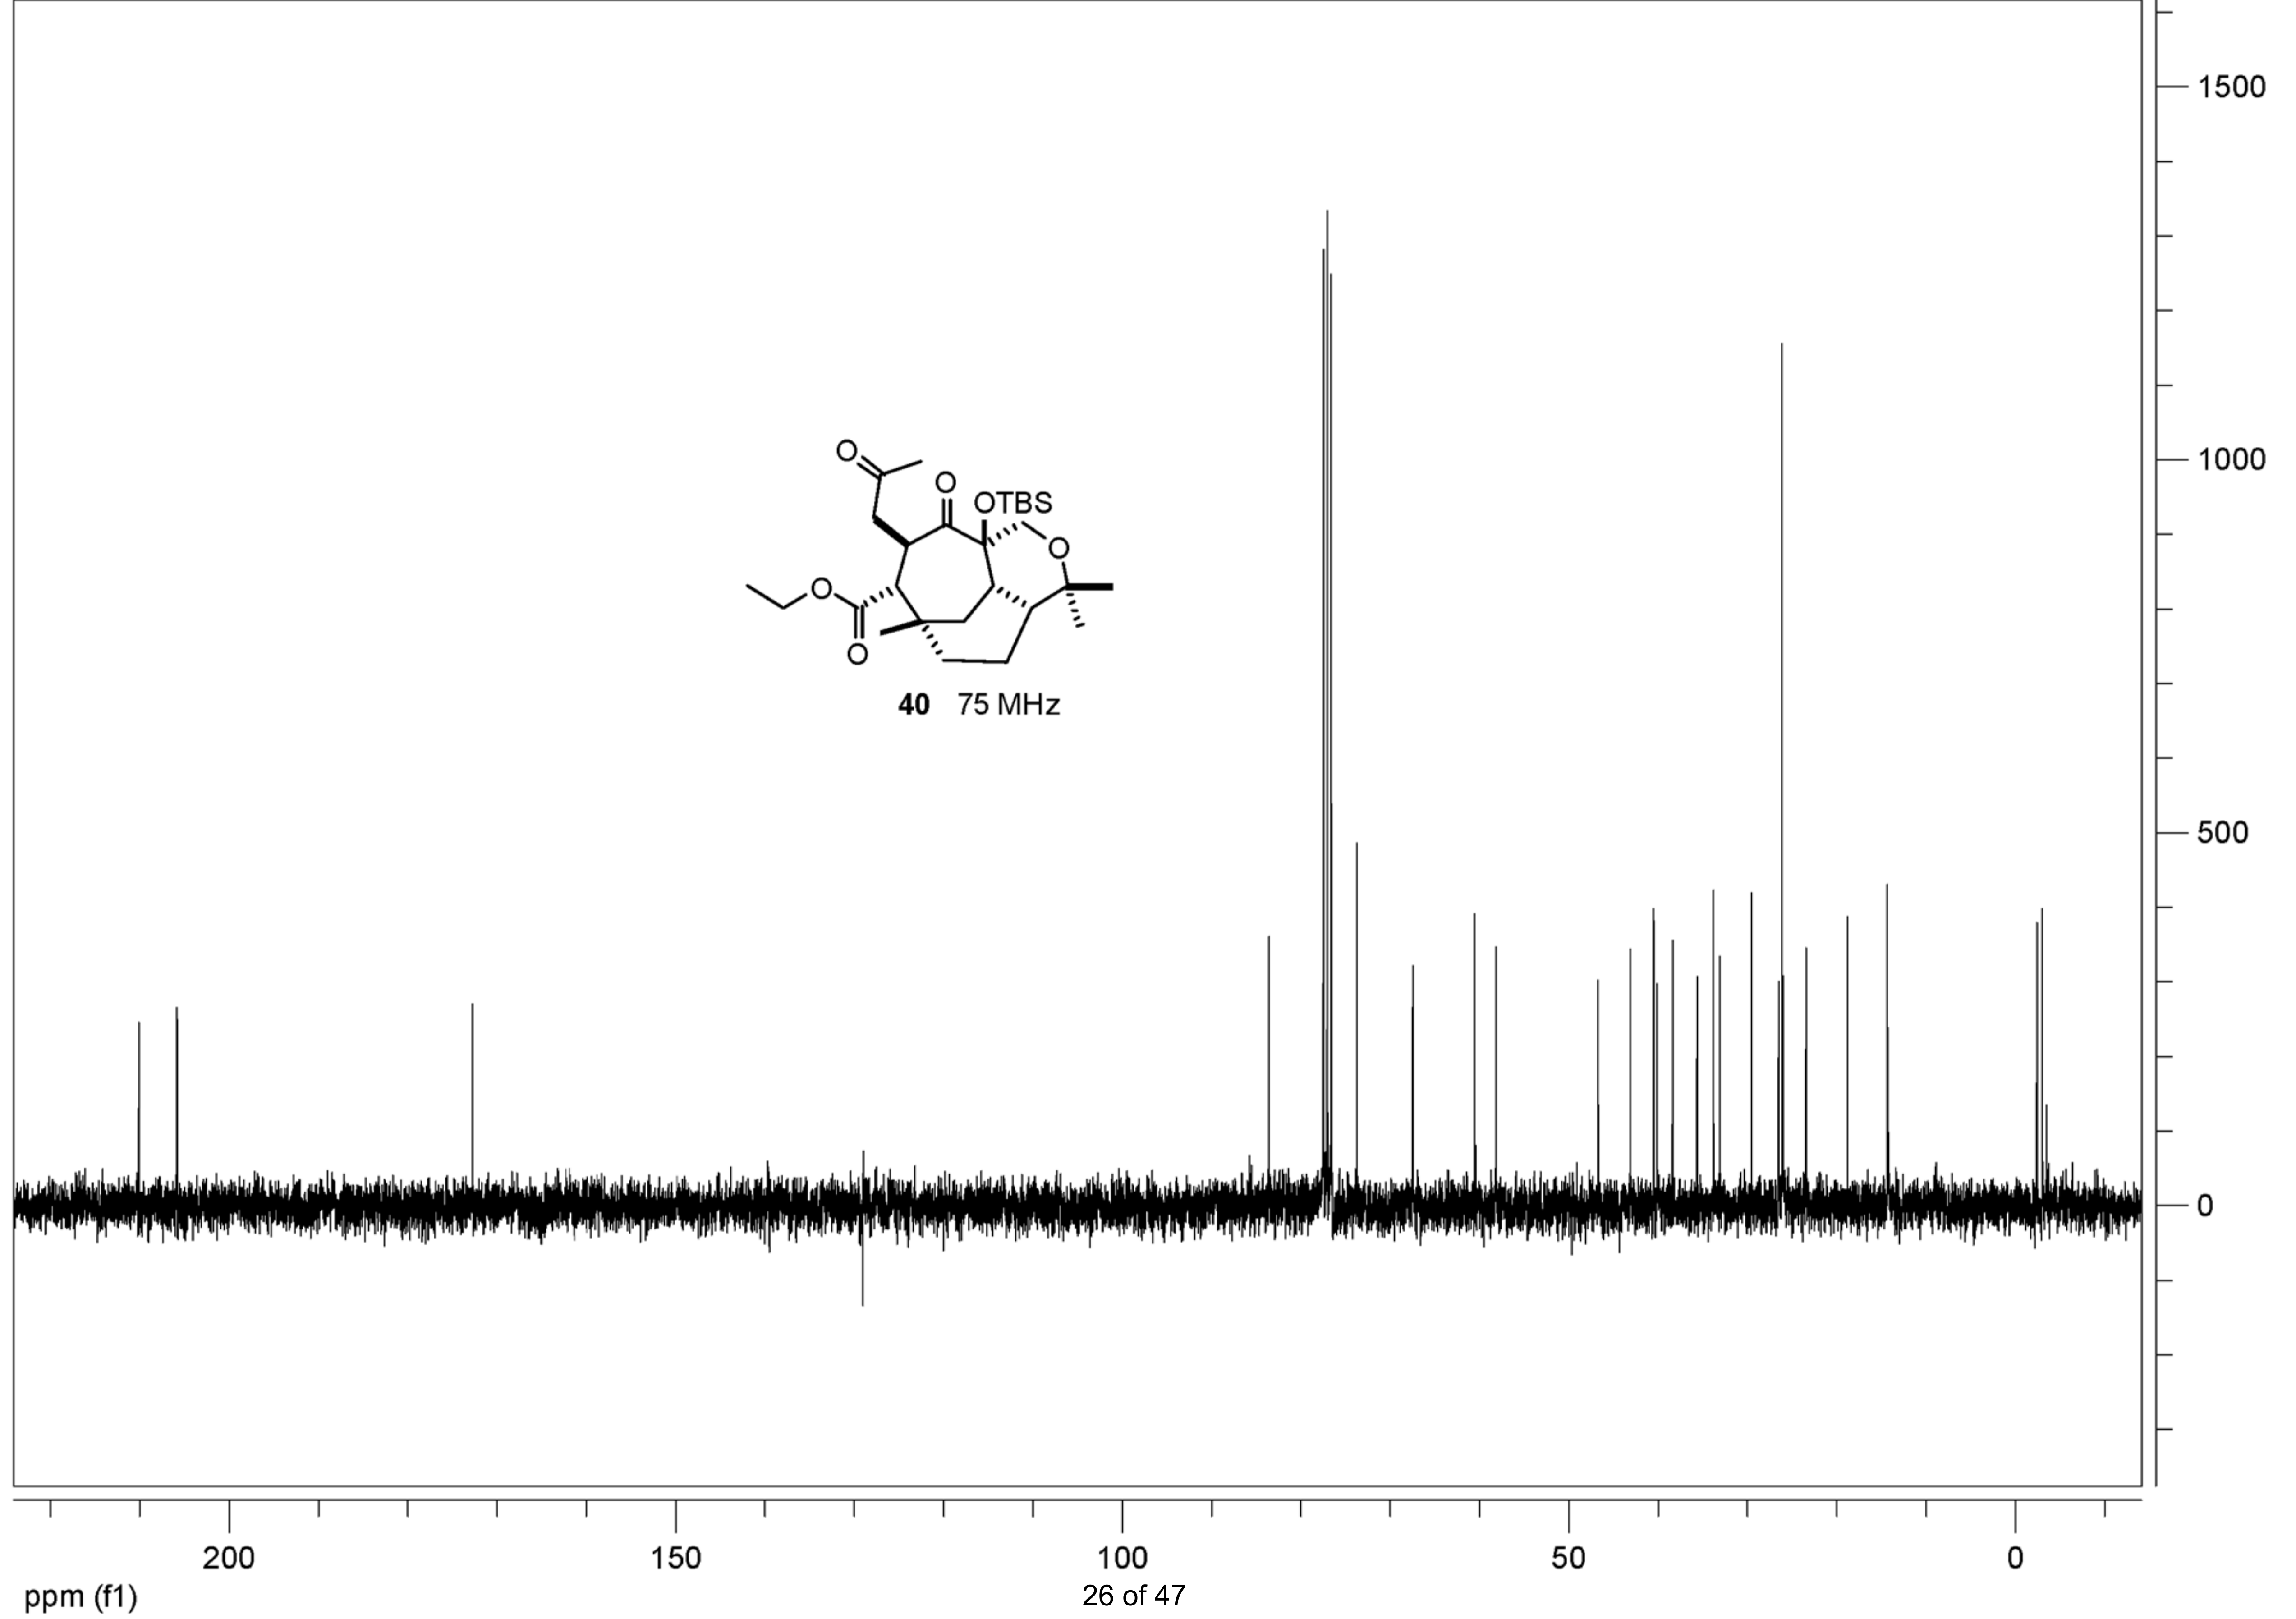

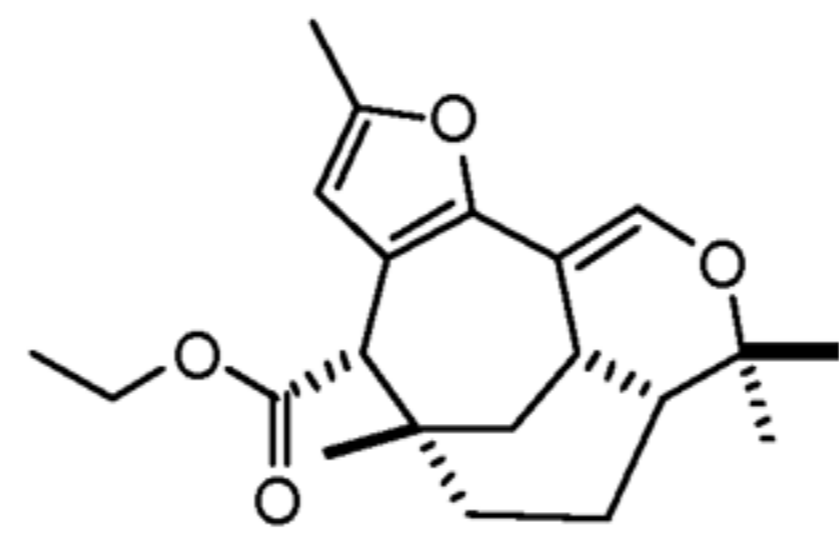

41 500 MHz

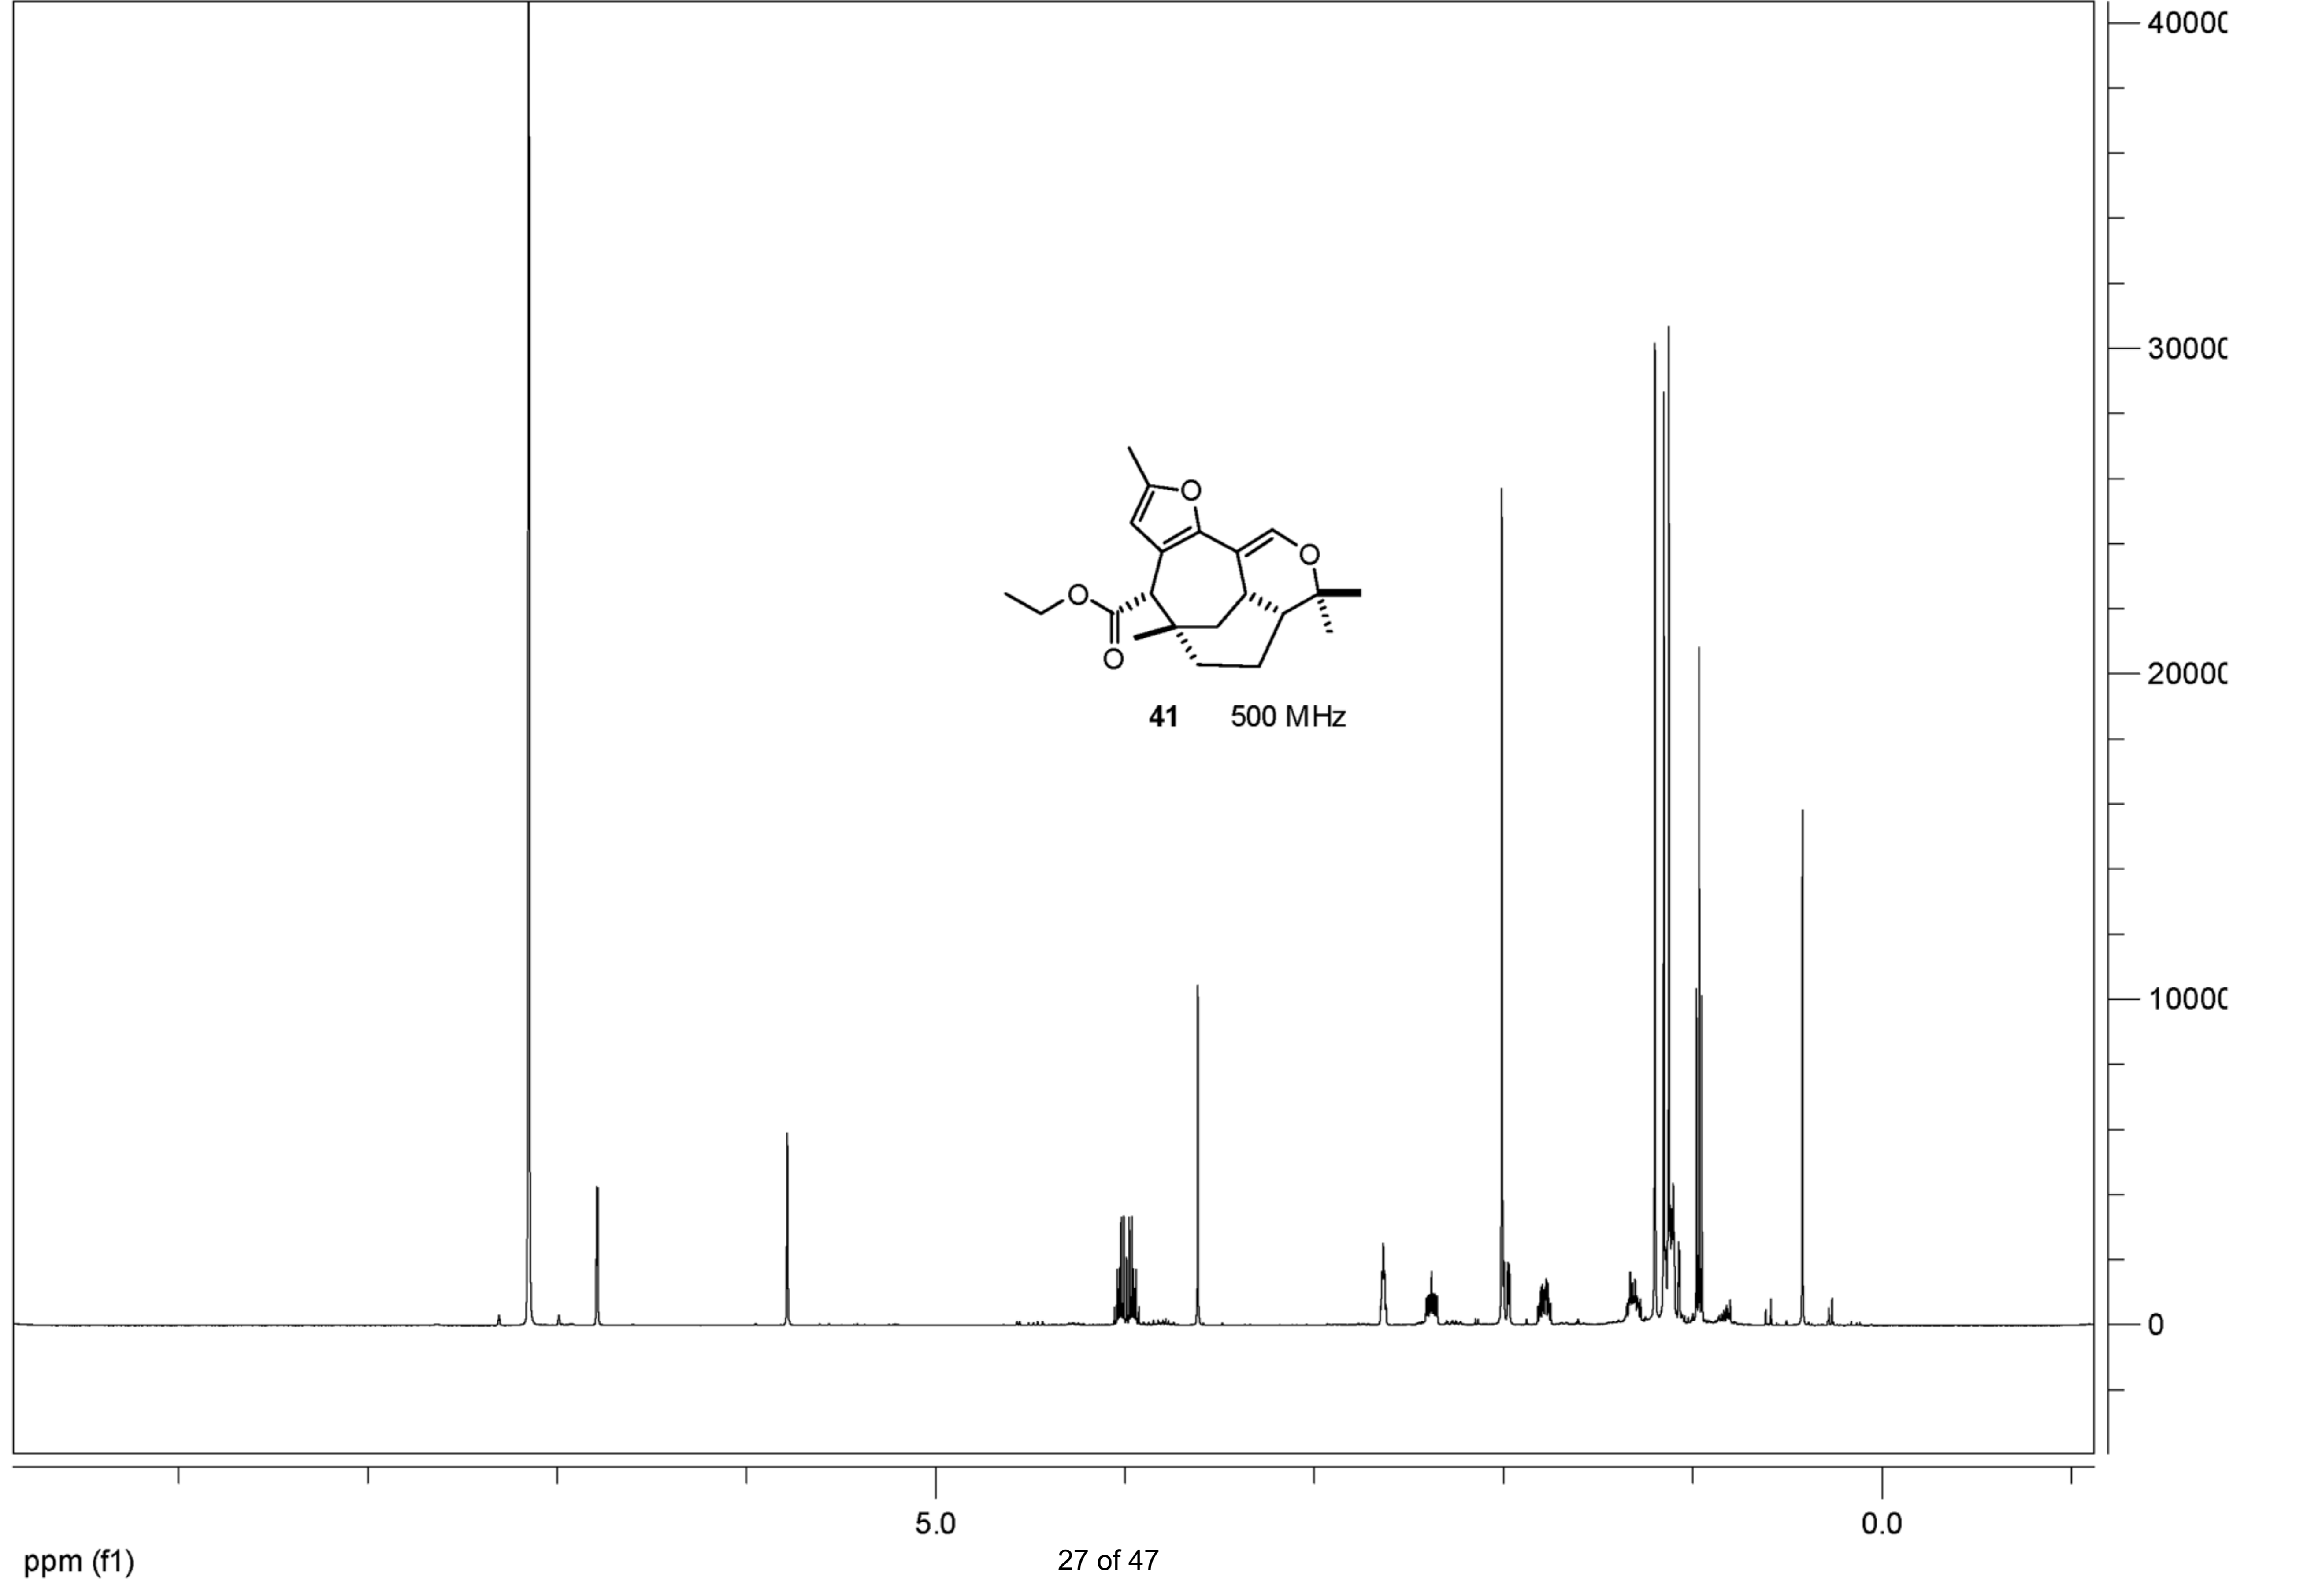

5.0

0.0

ppm (f1)

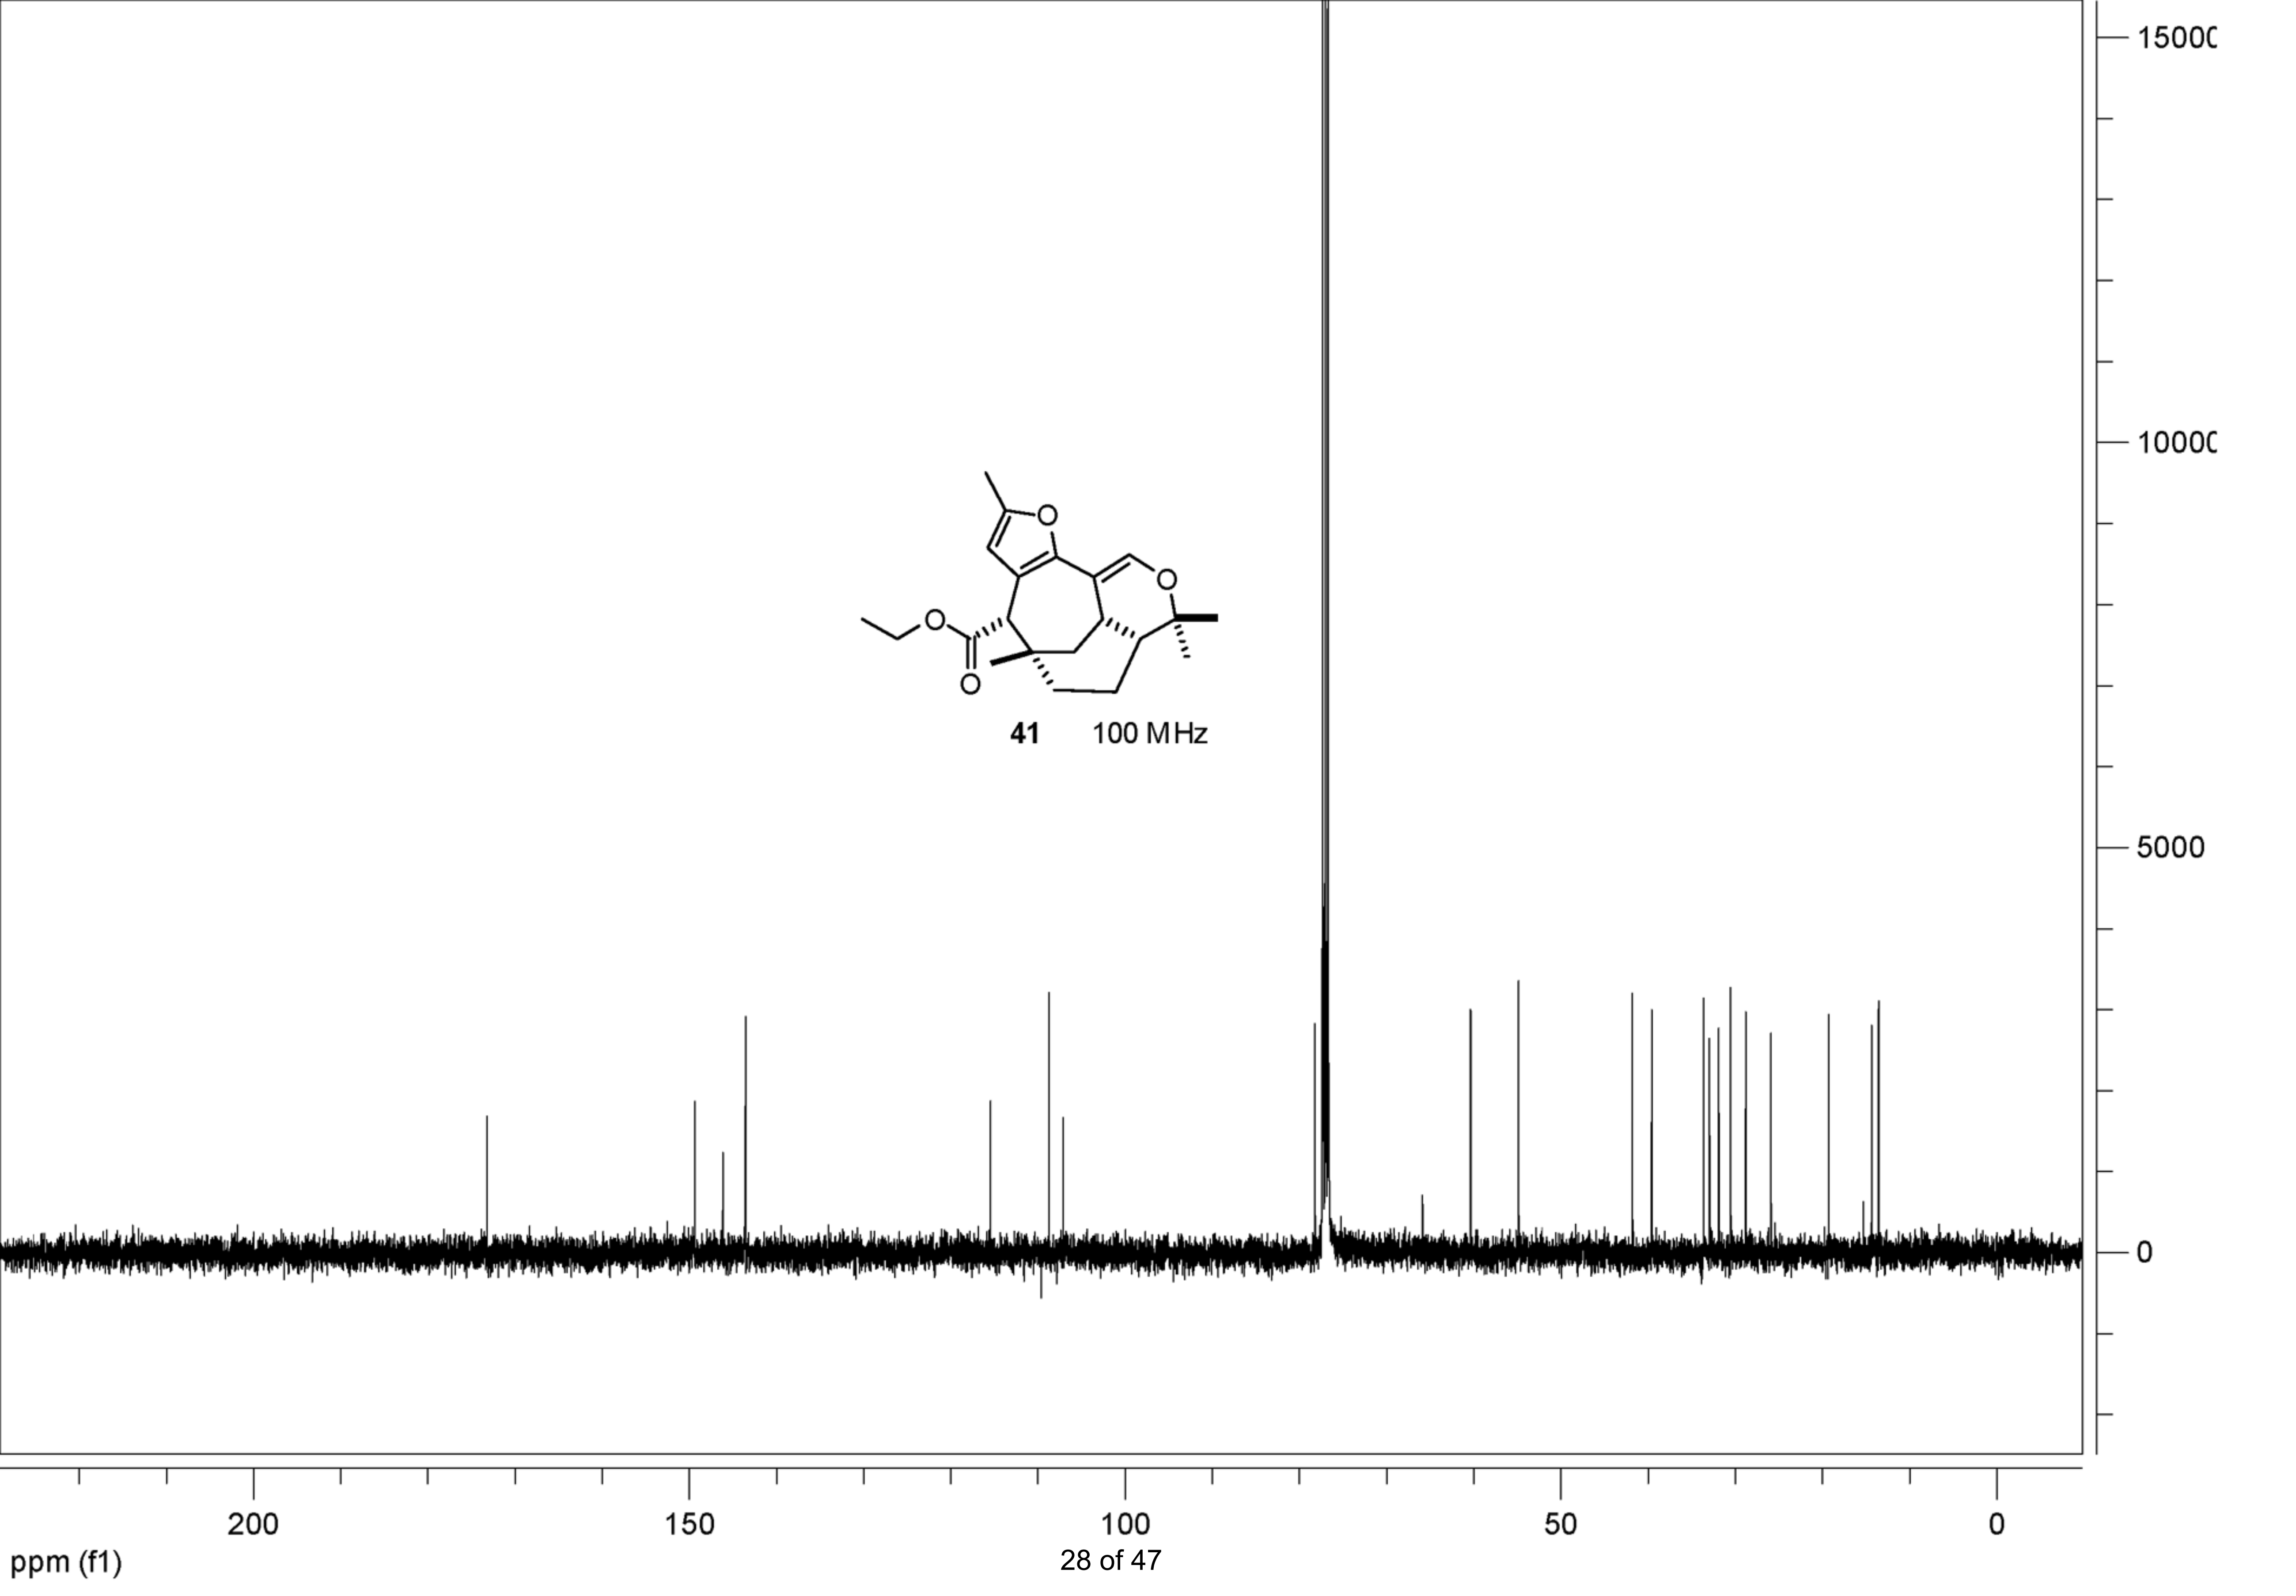

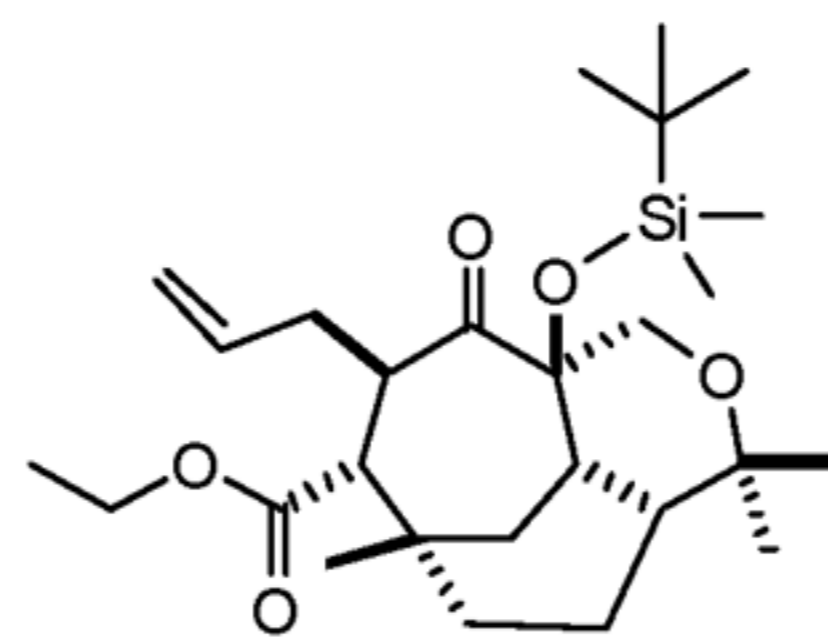

43 300 MHz

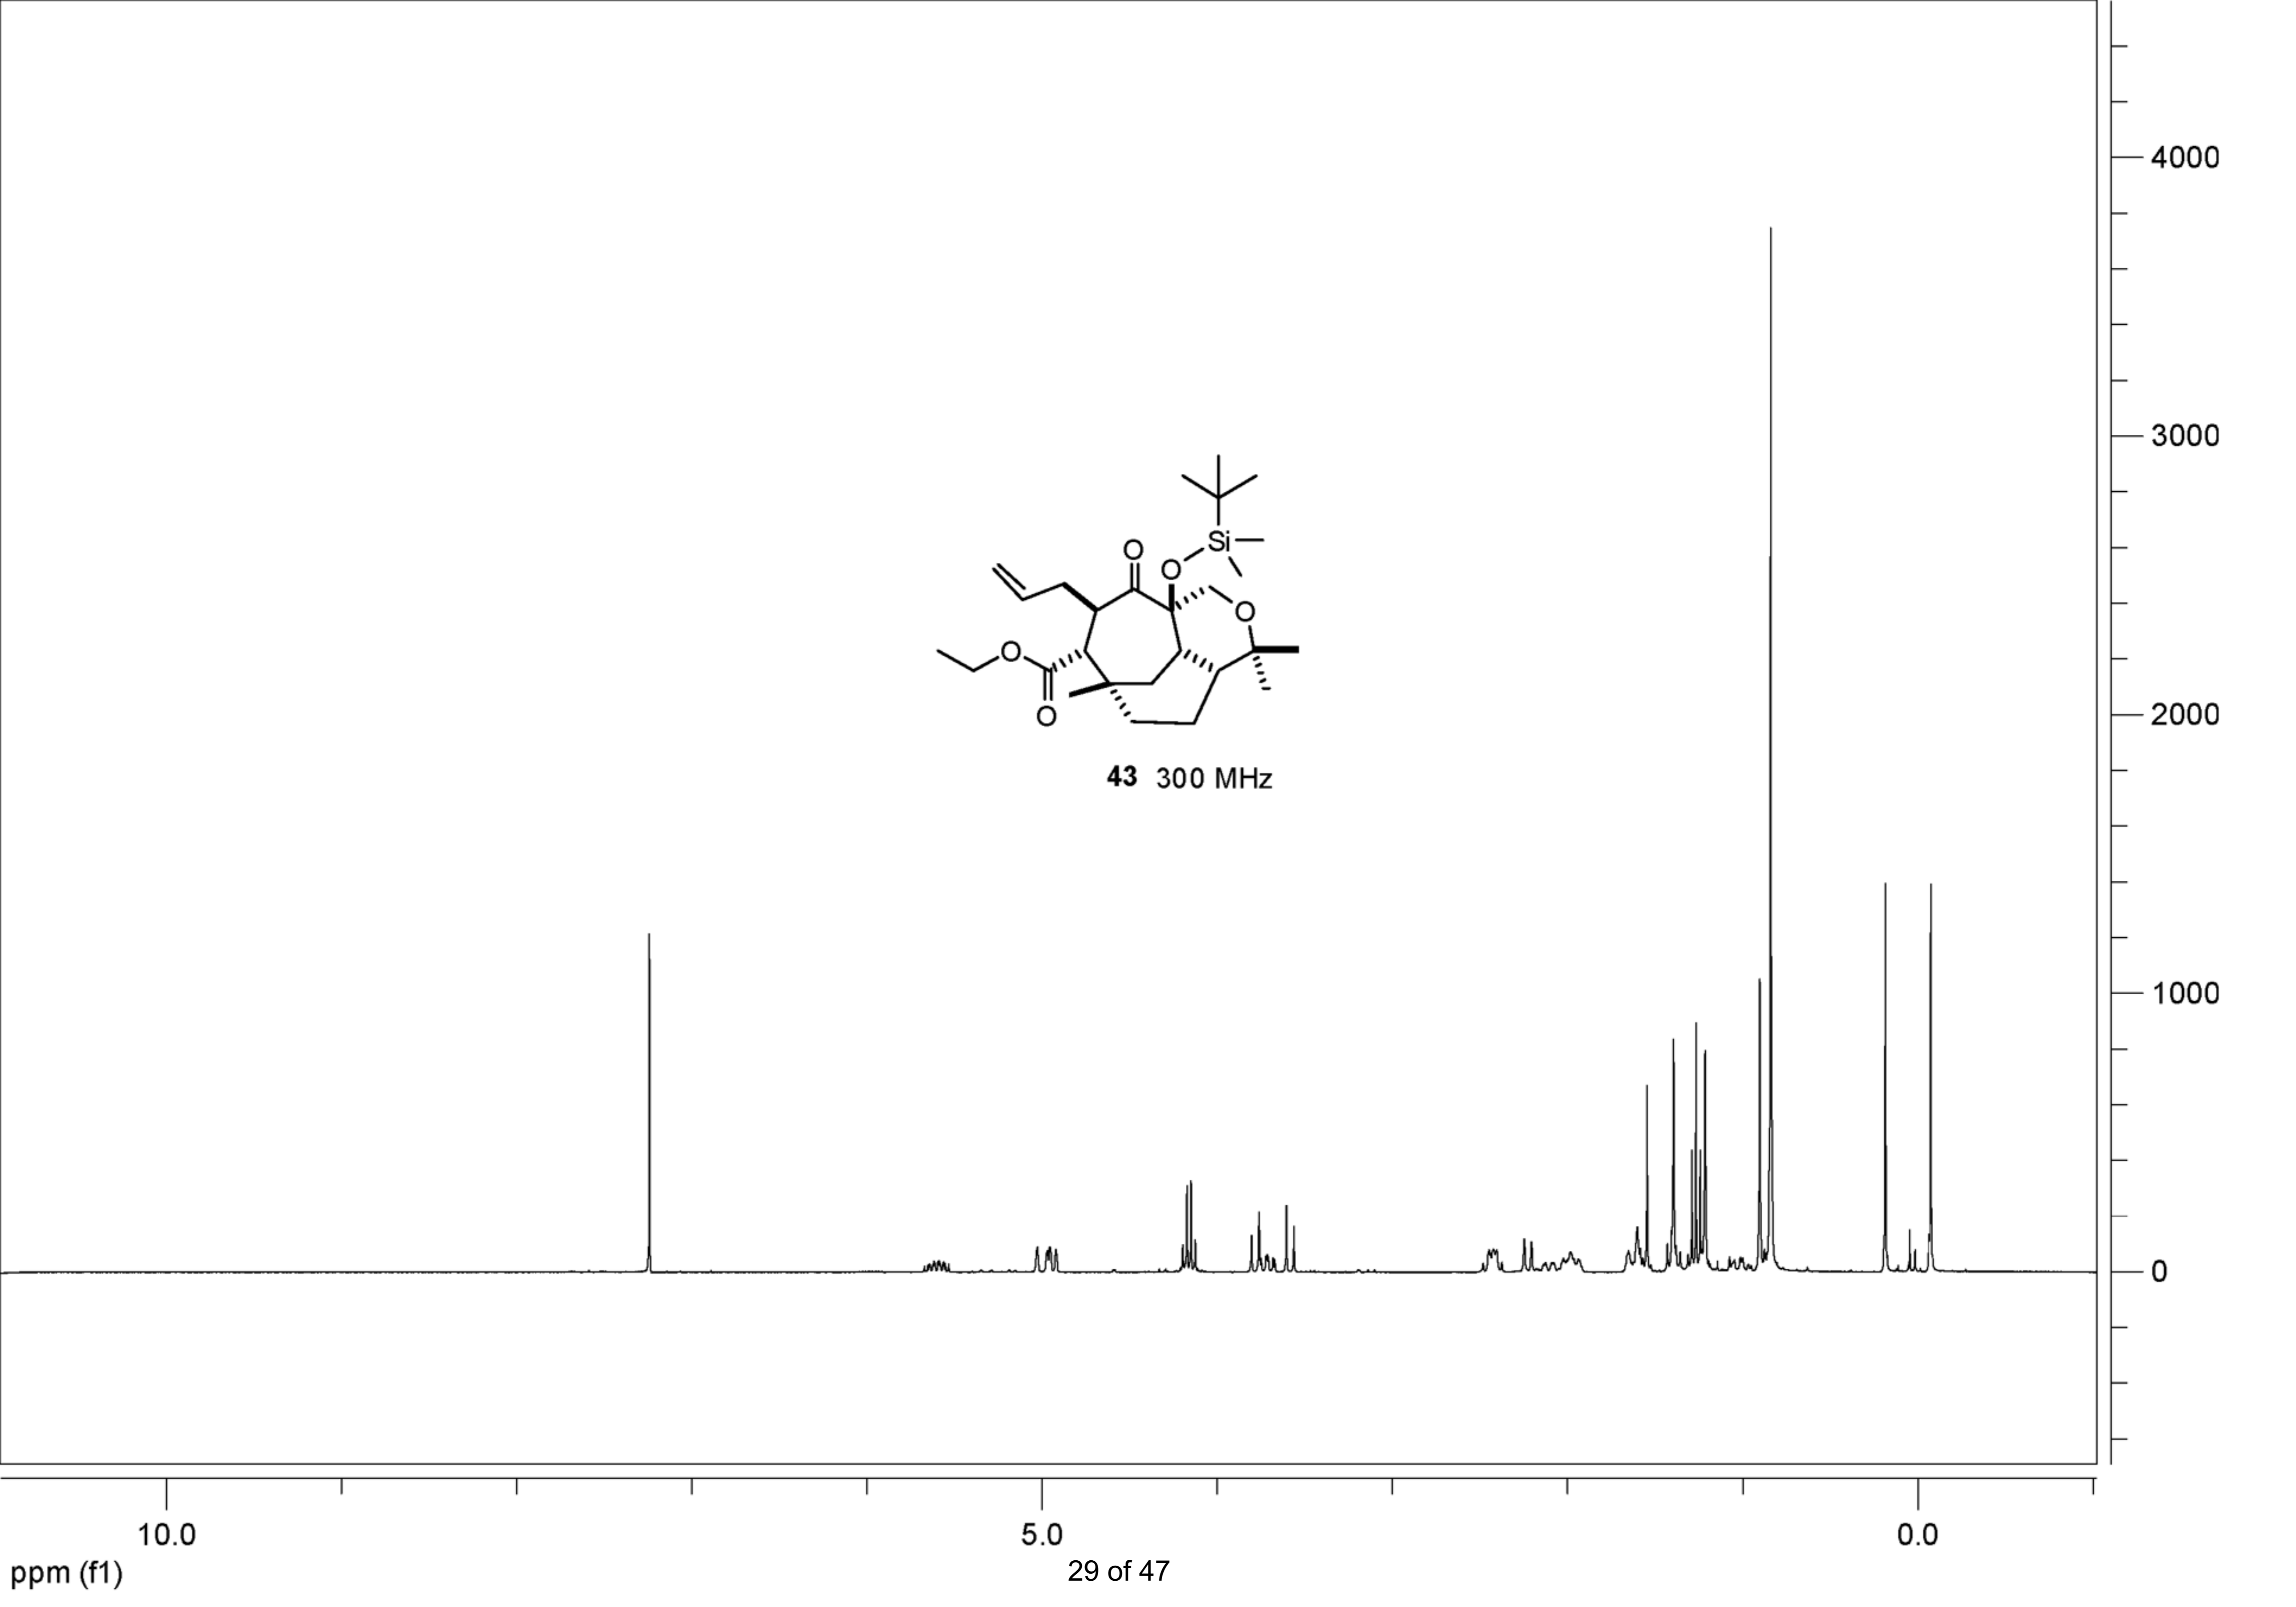

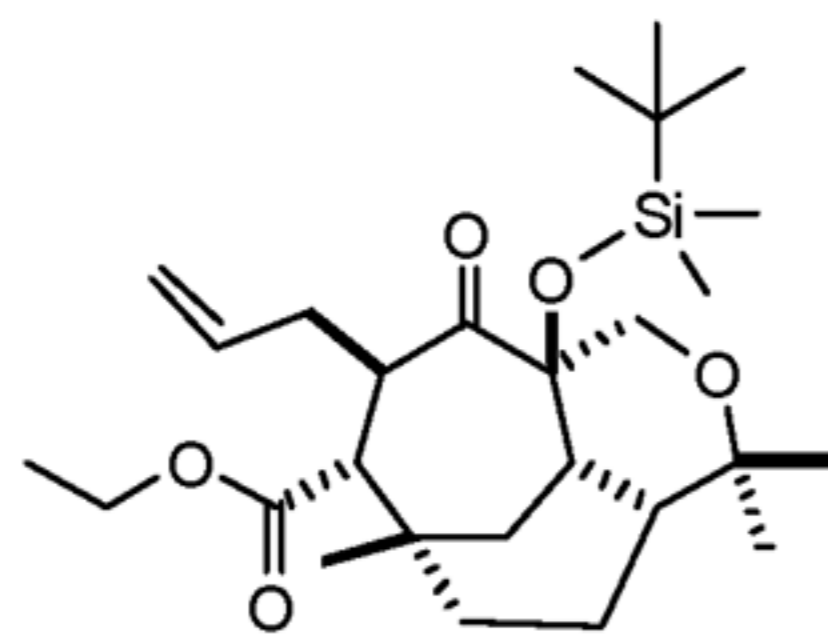

43 75 MHz

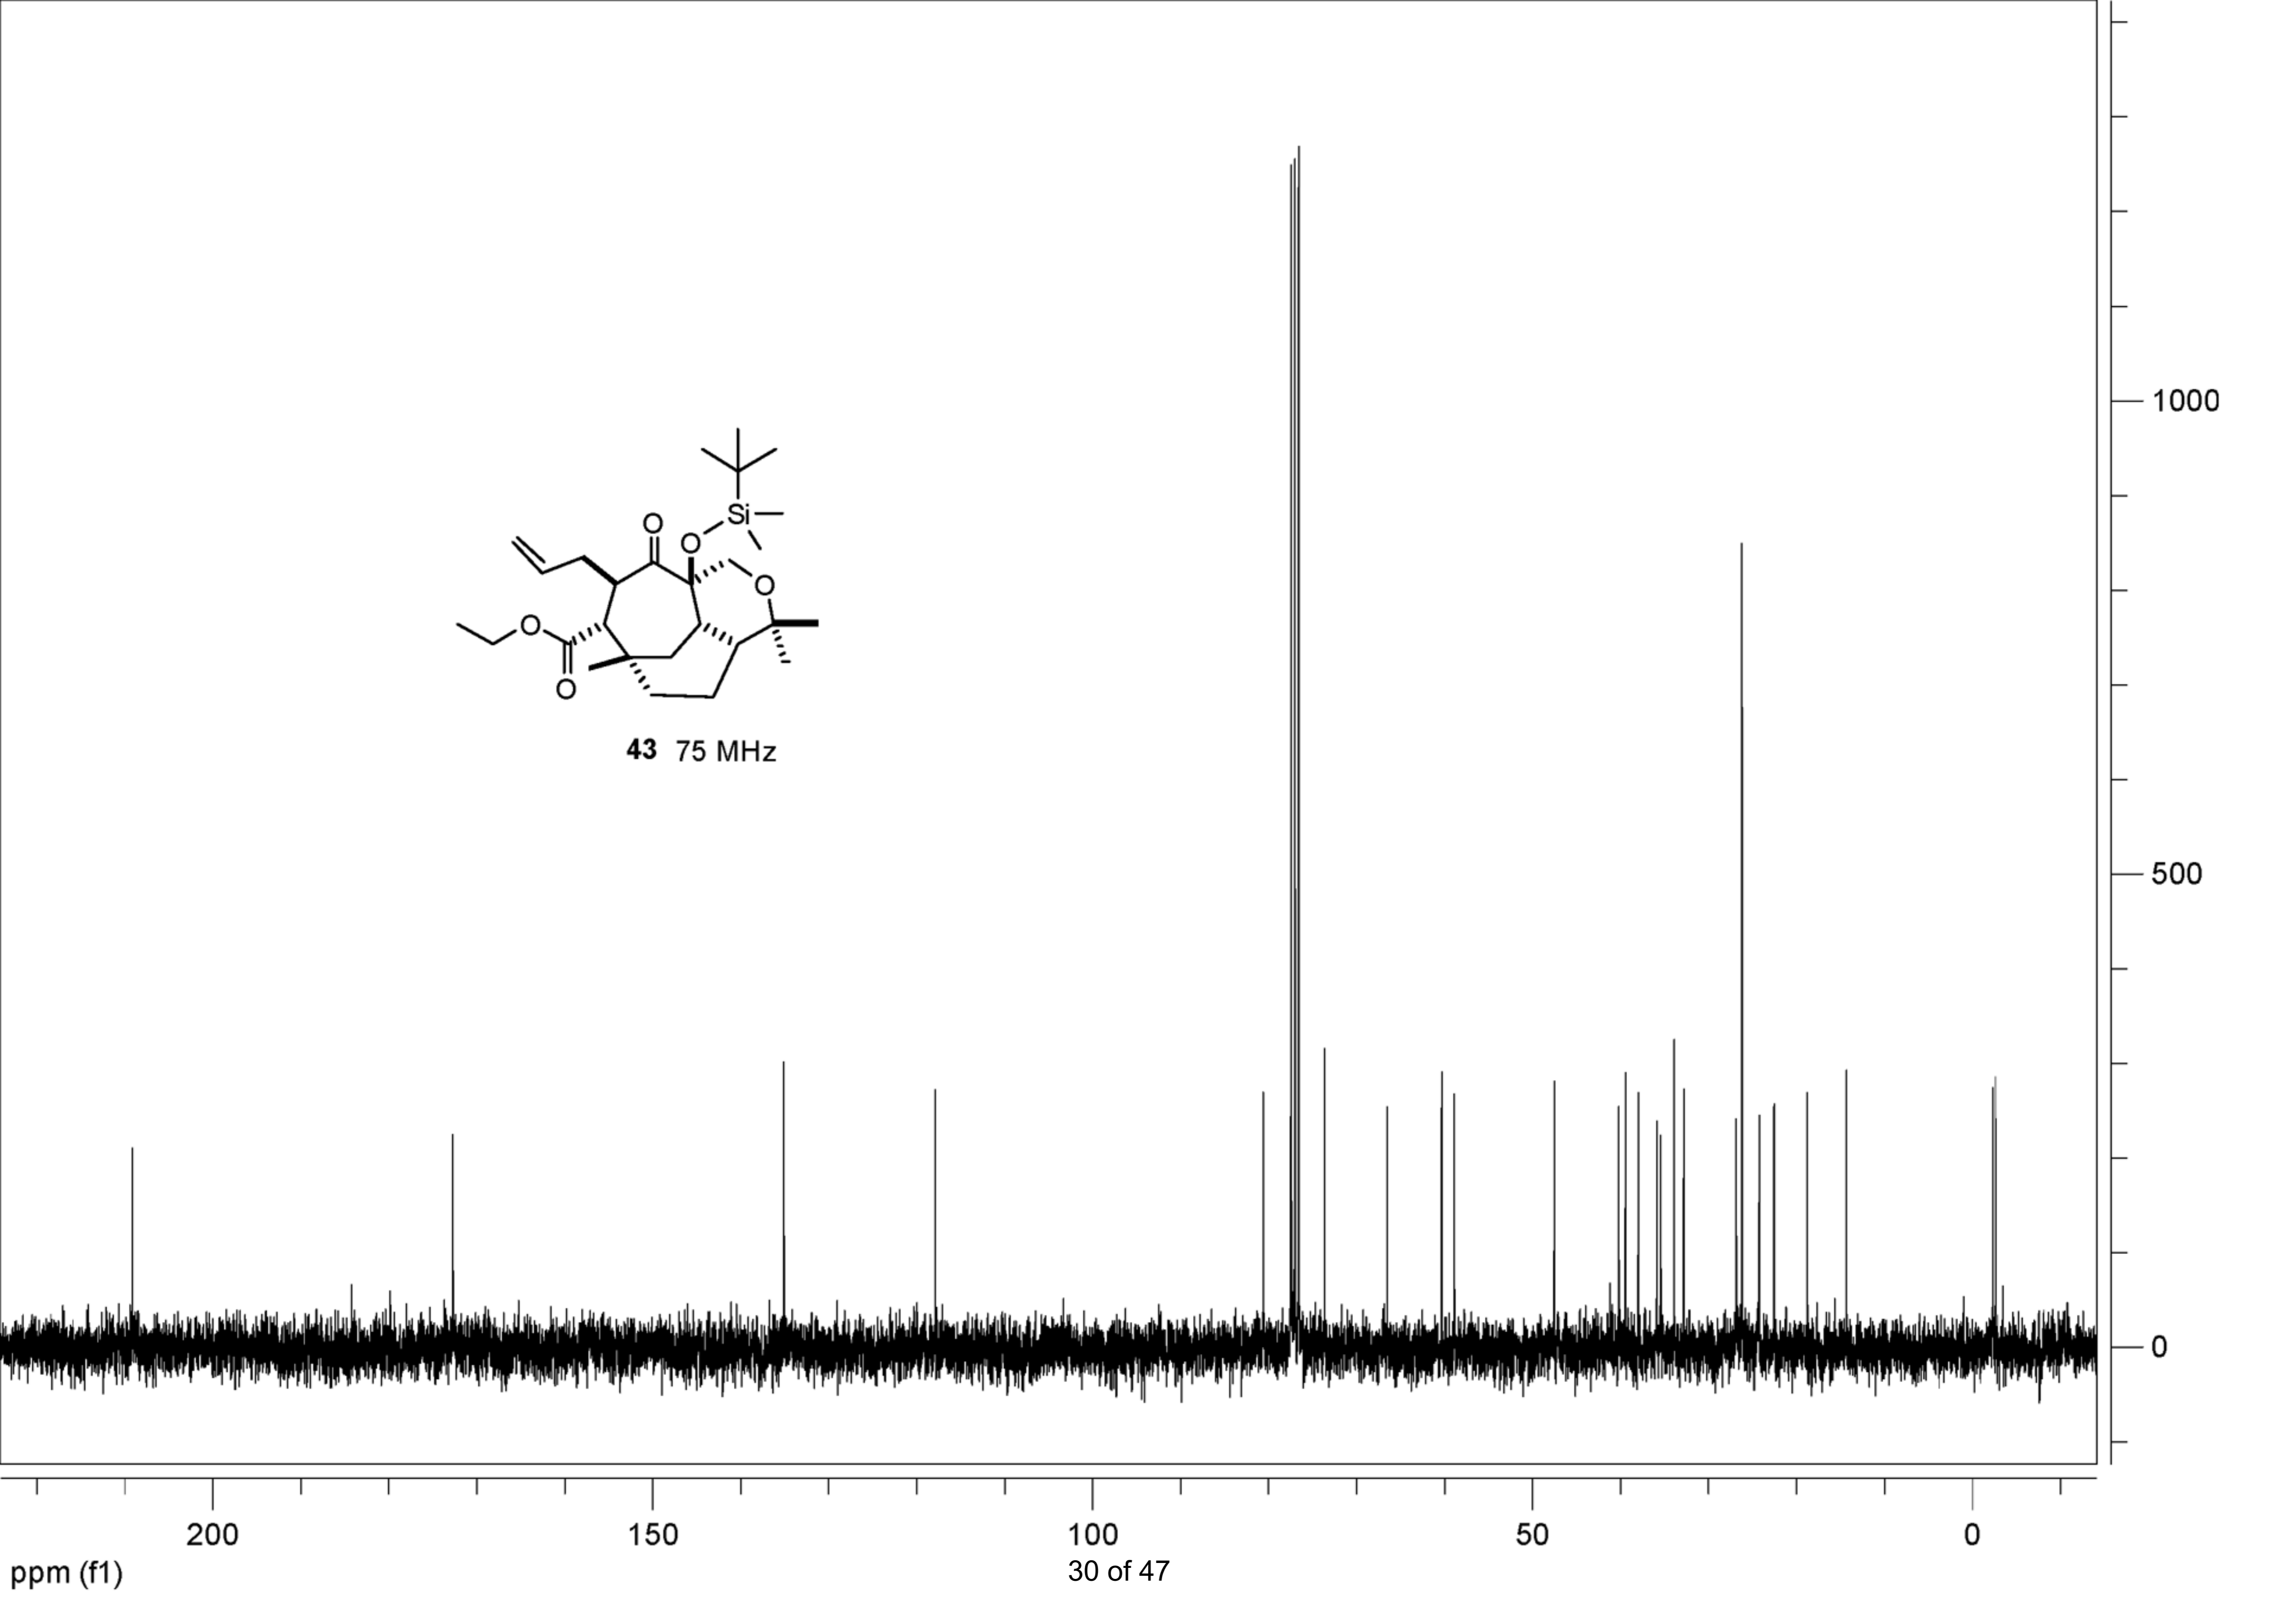

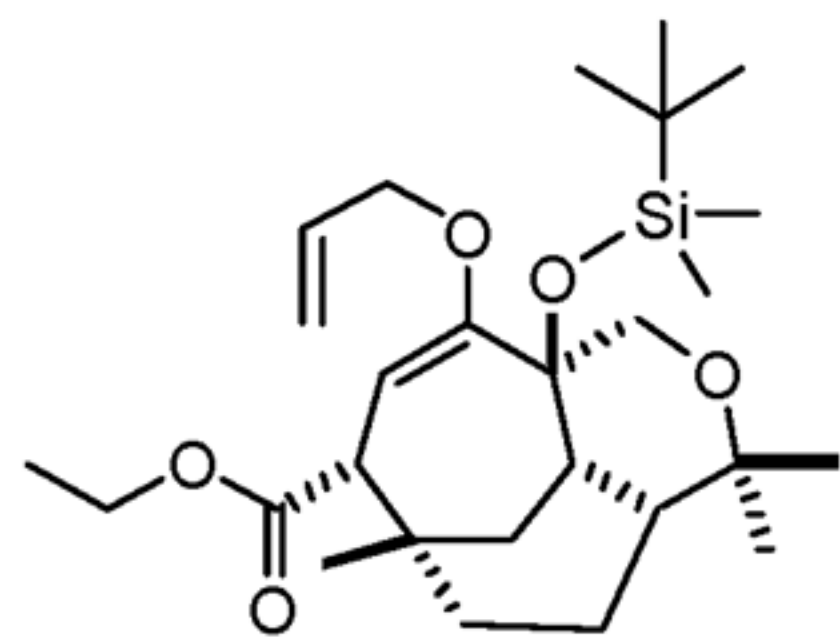

44 300 MHz

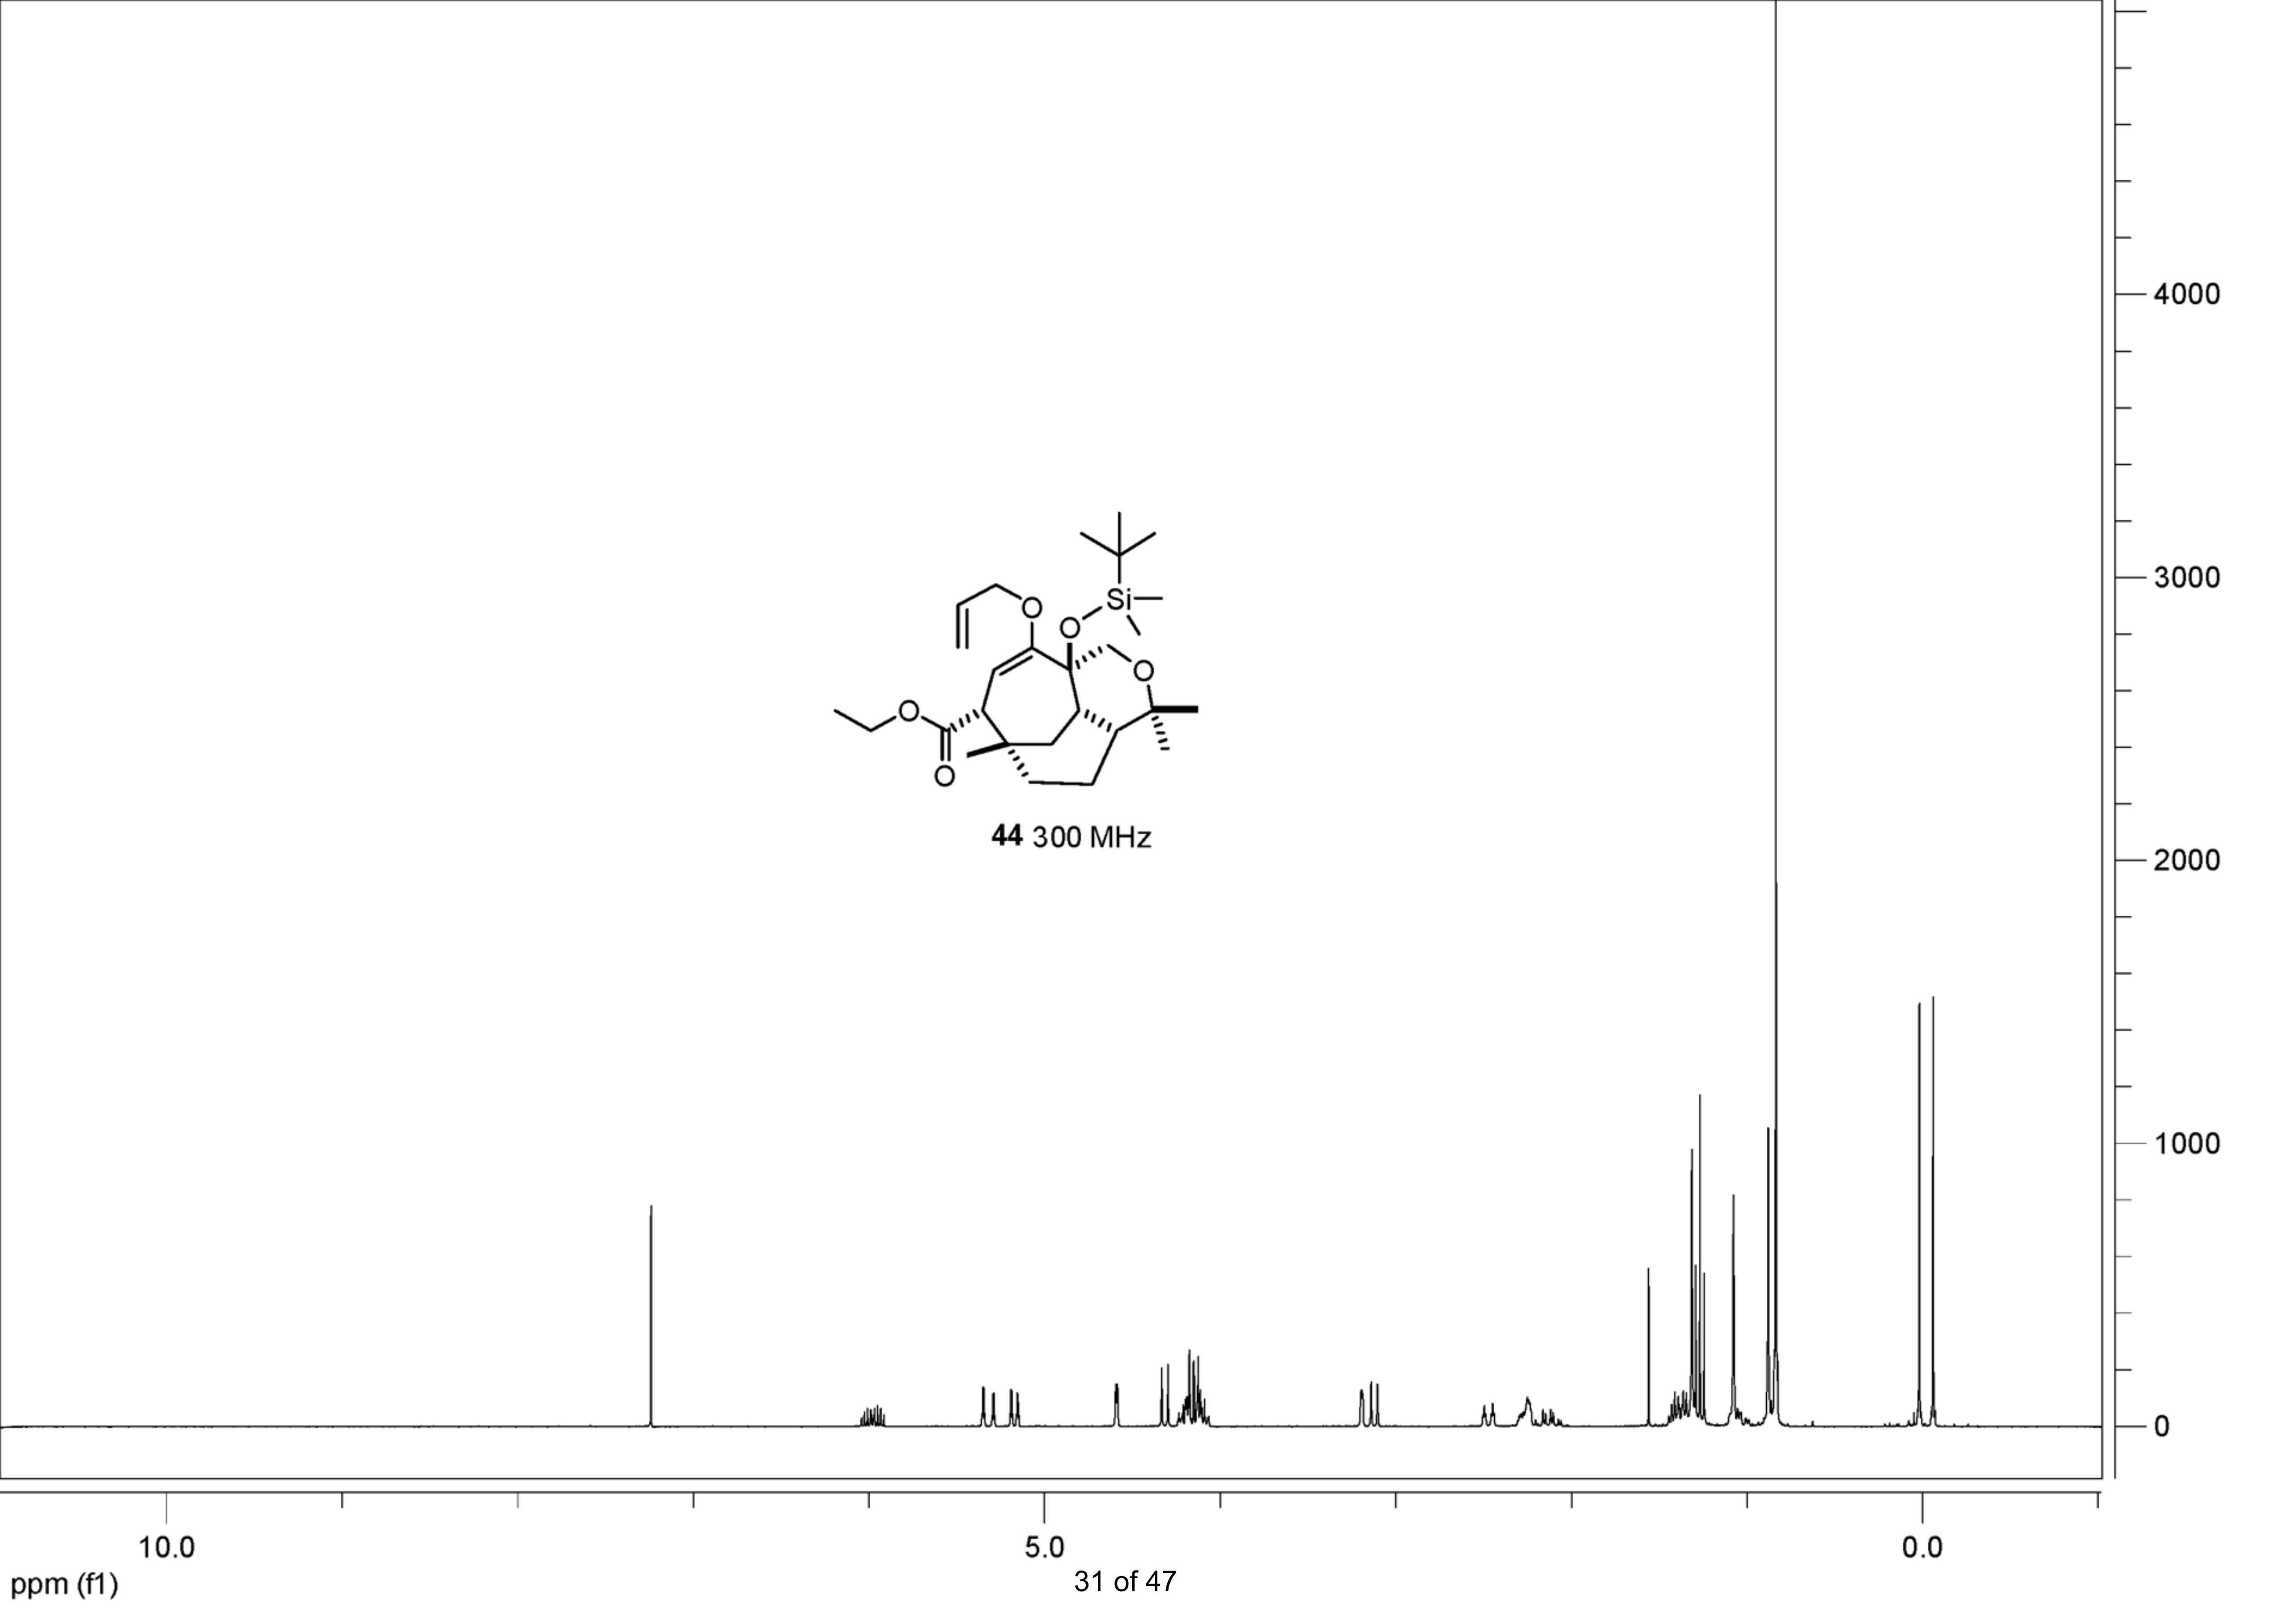



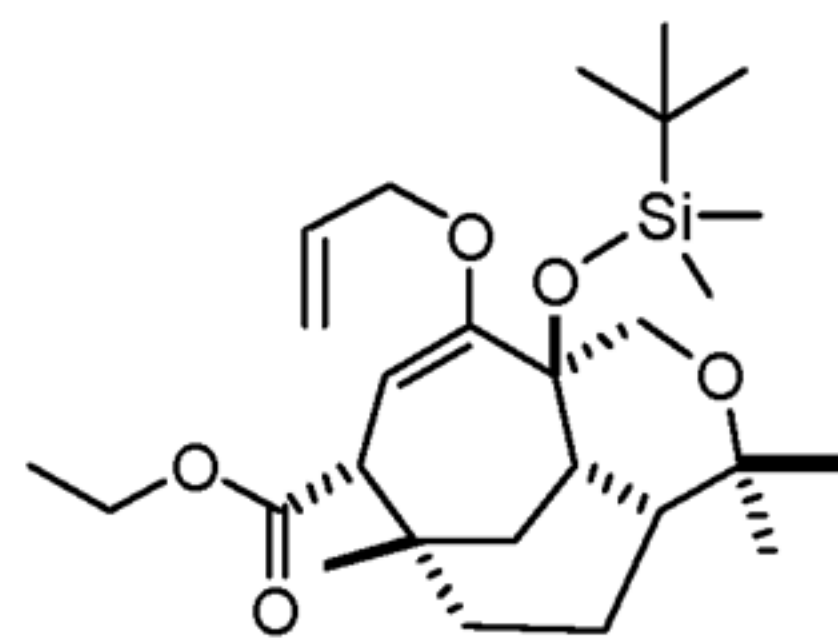

44 100 MHz

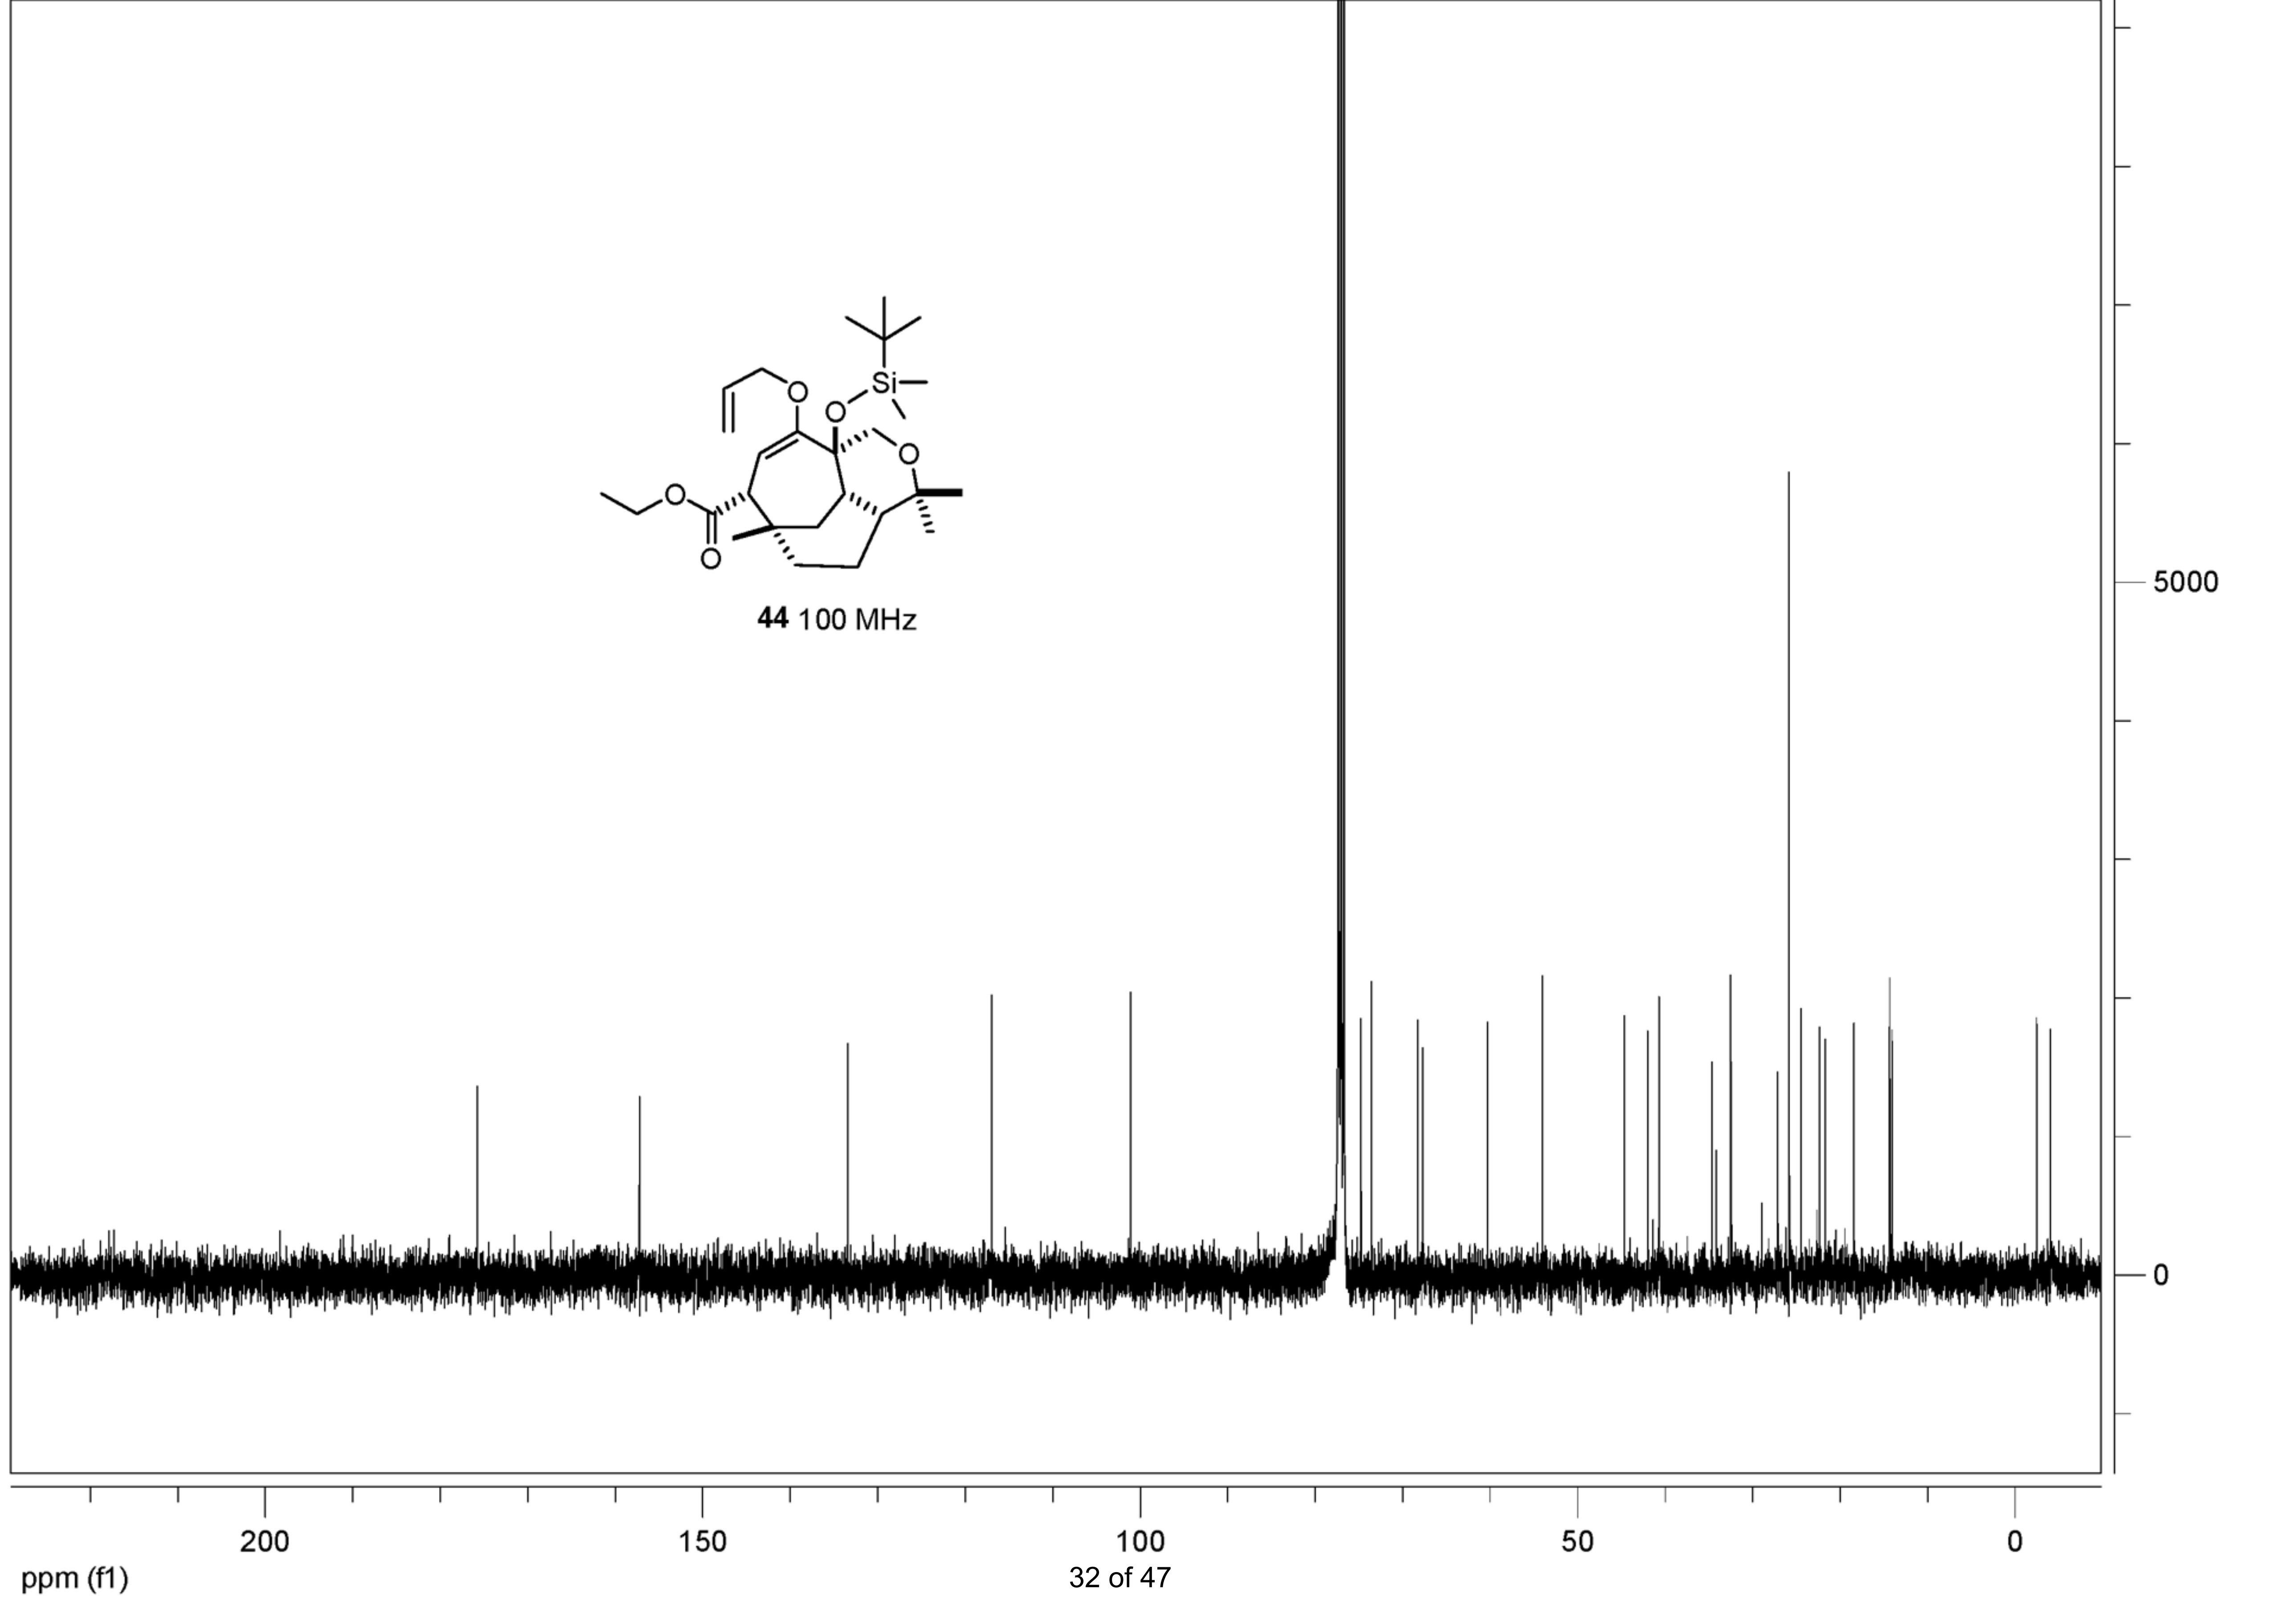



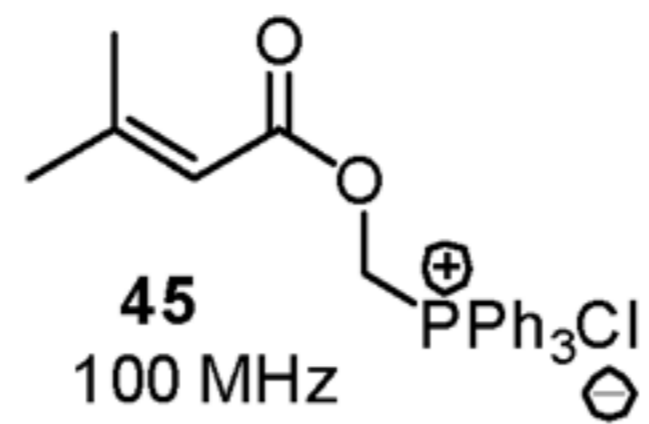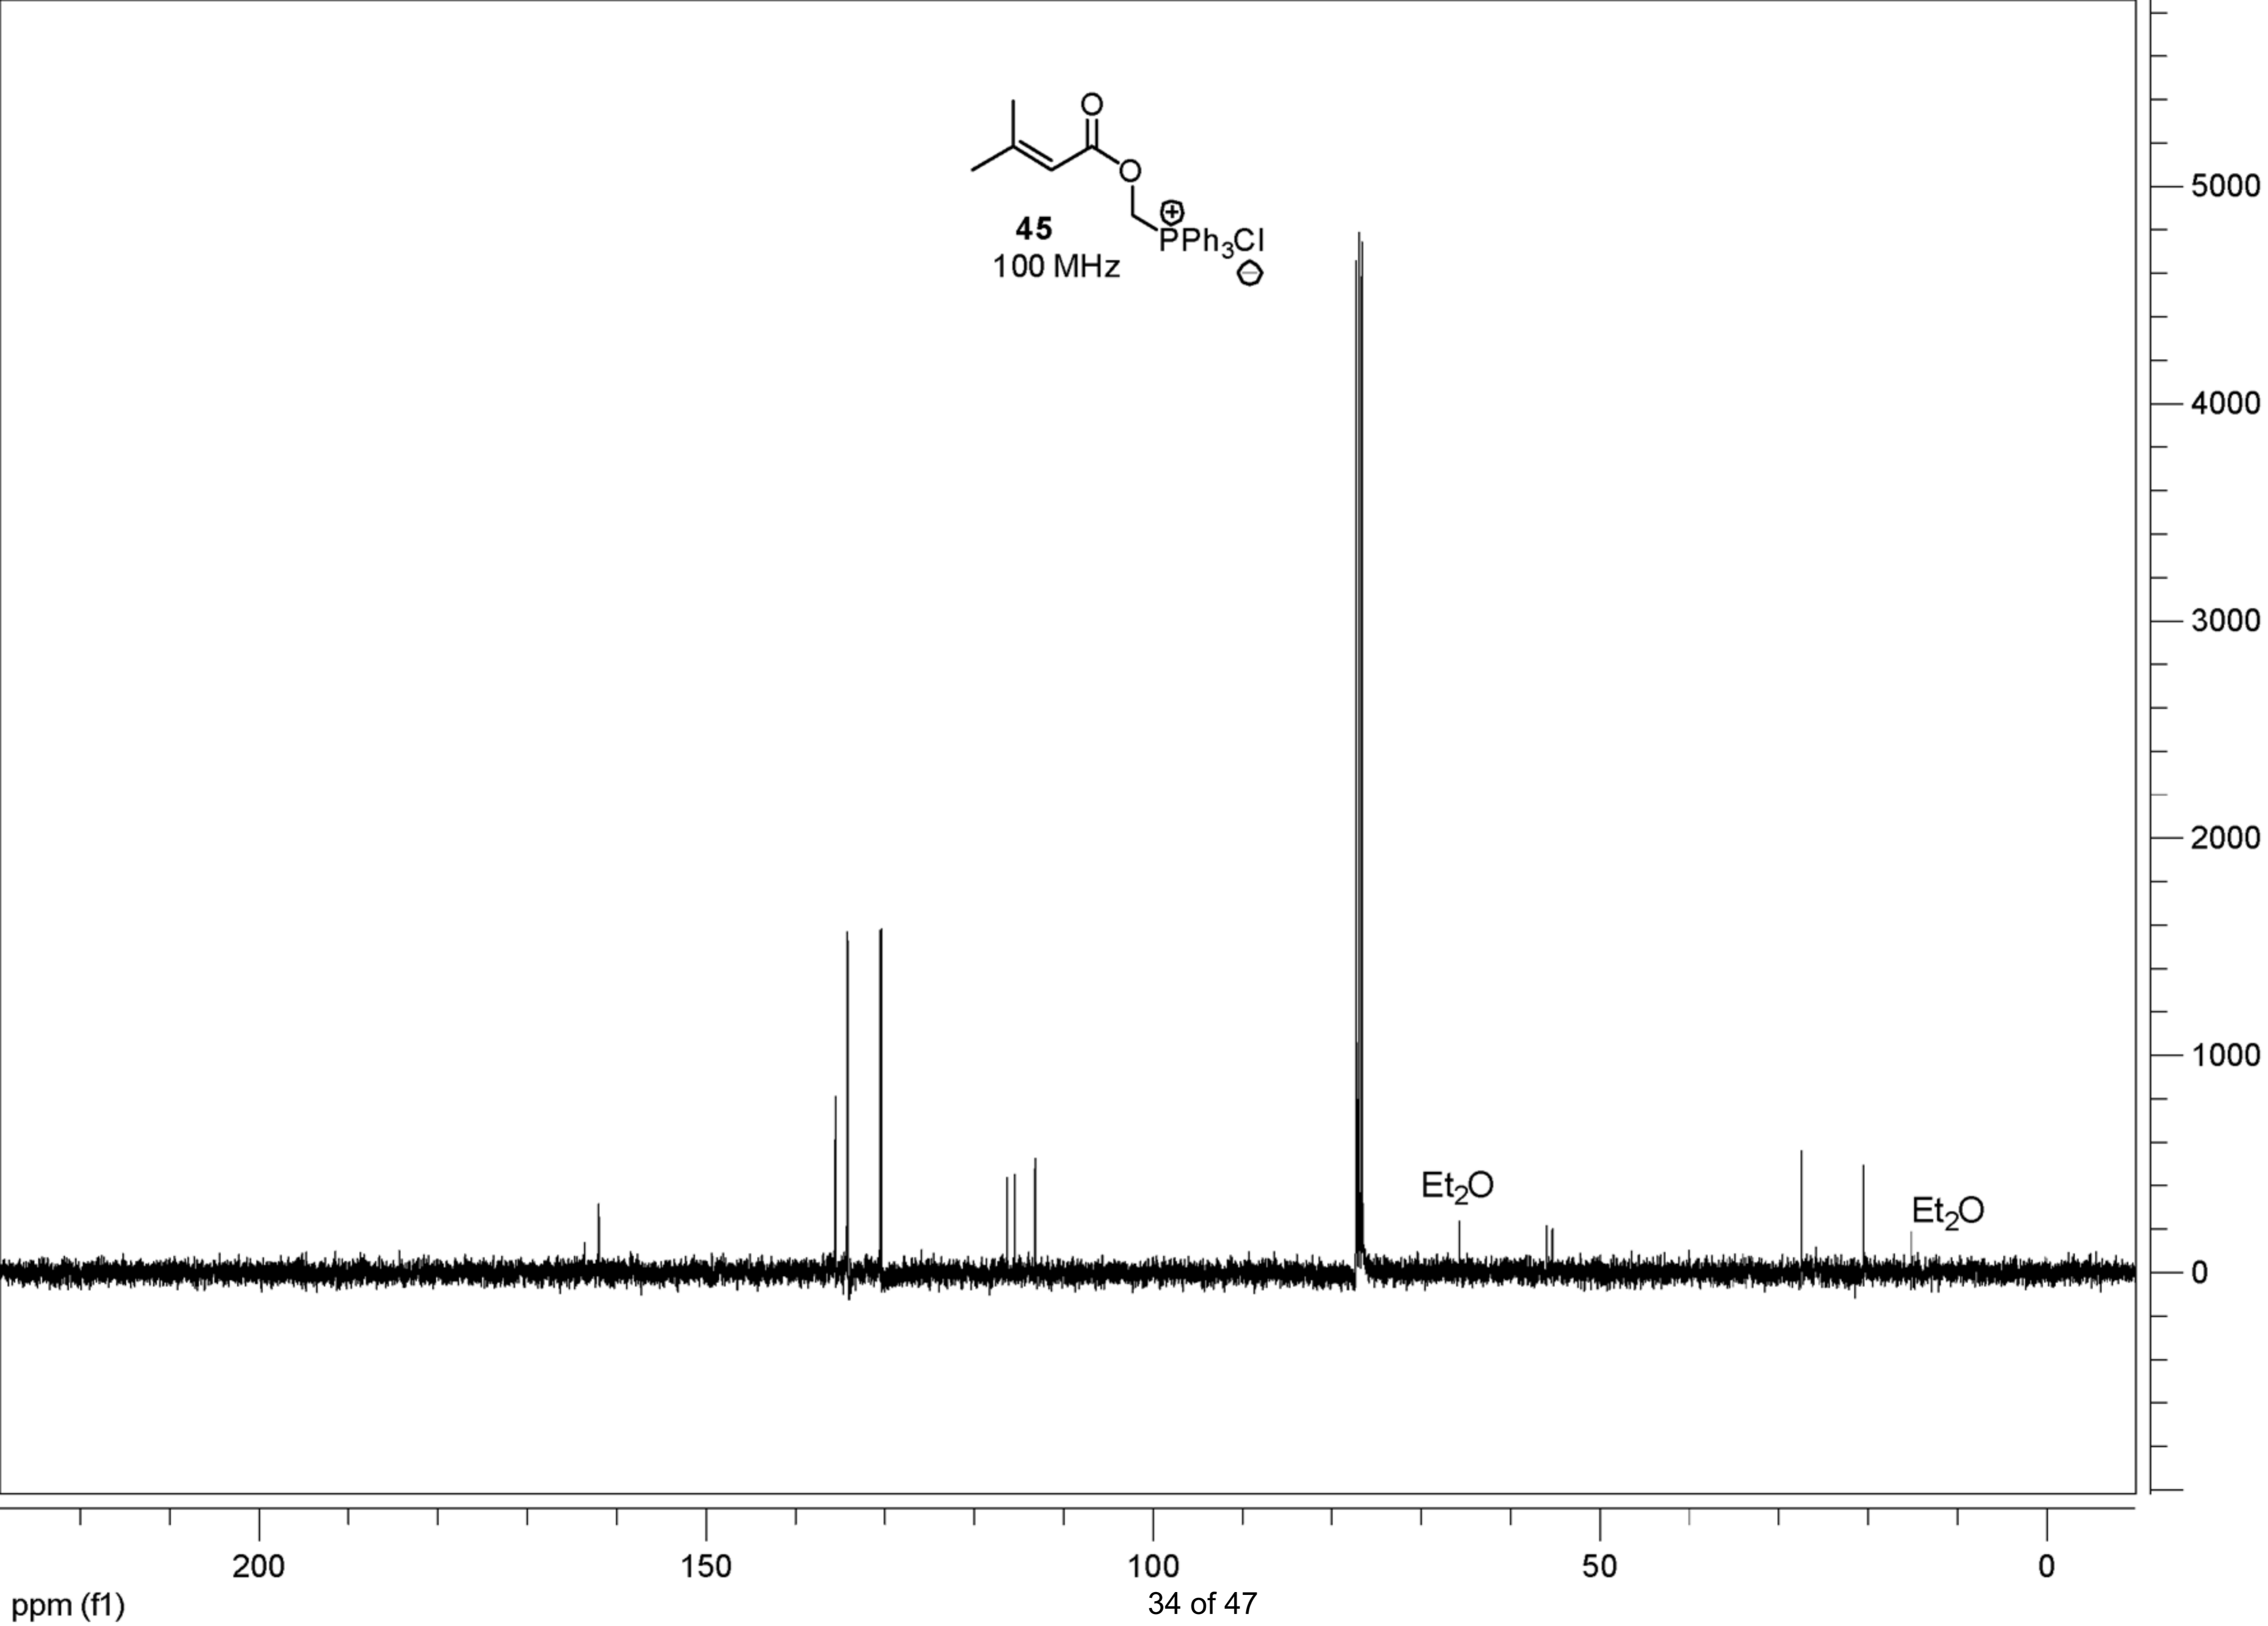

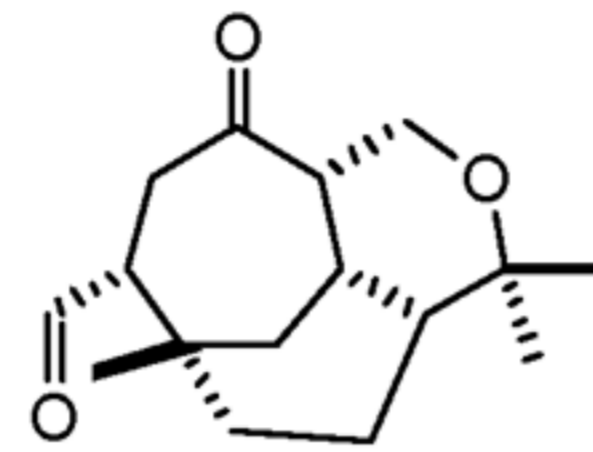

46 400 MHz

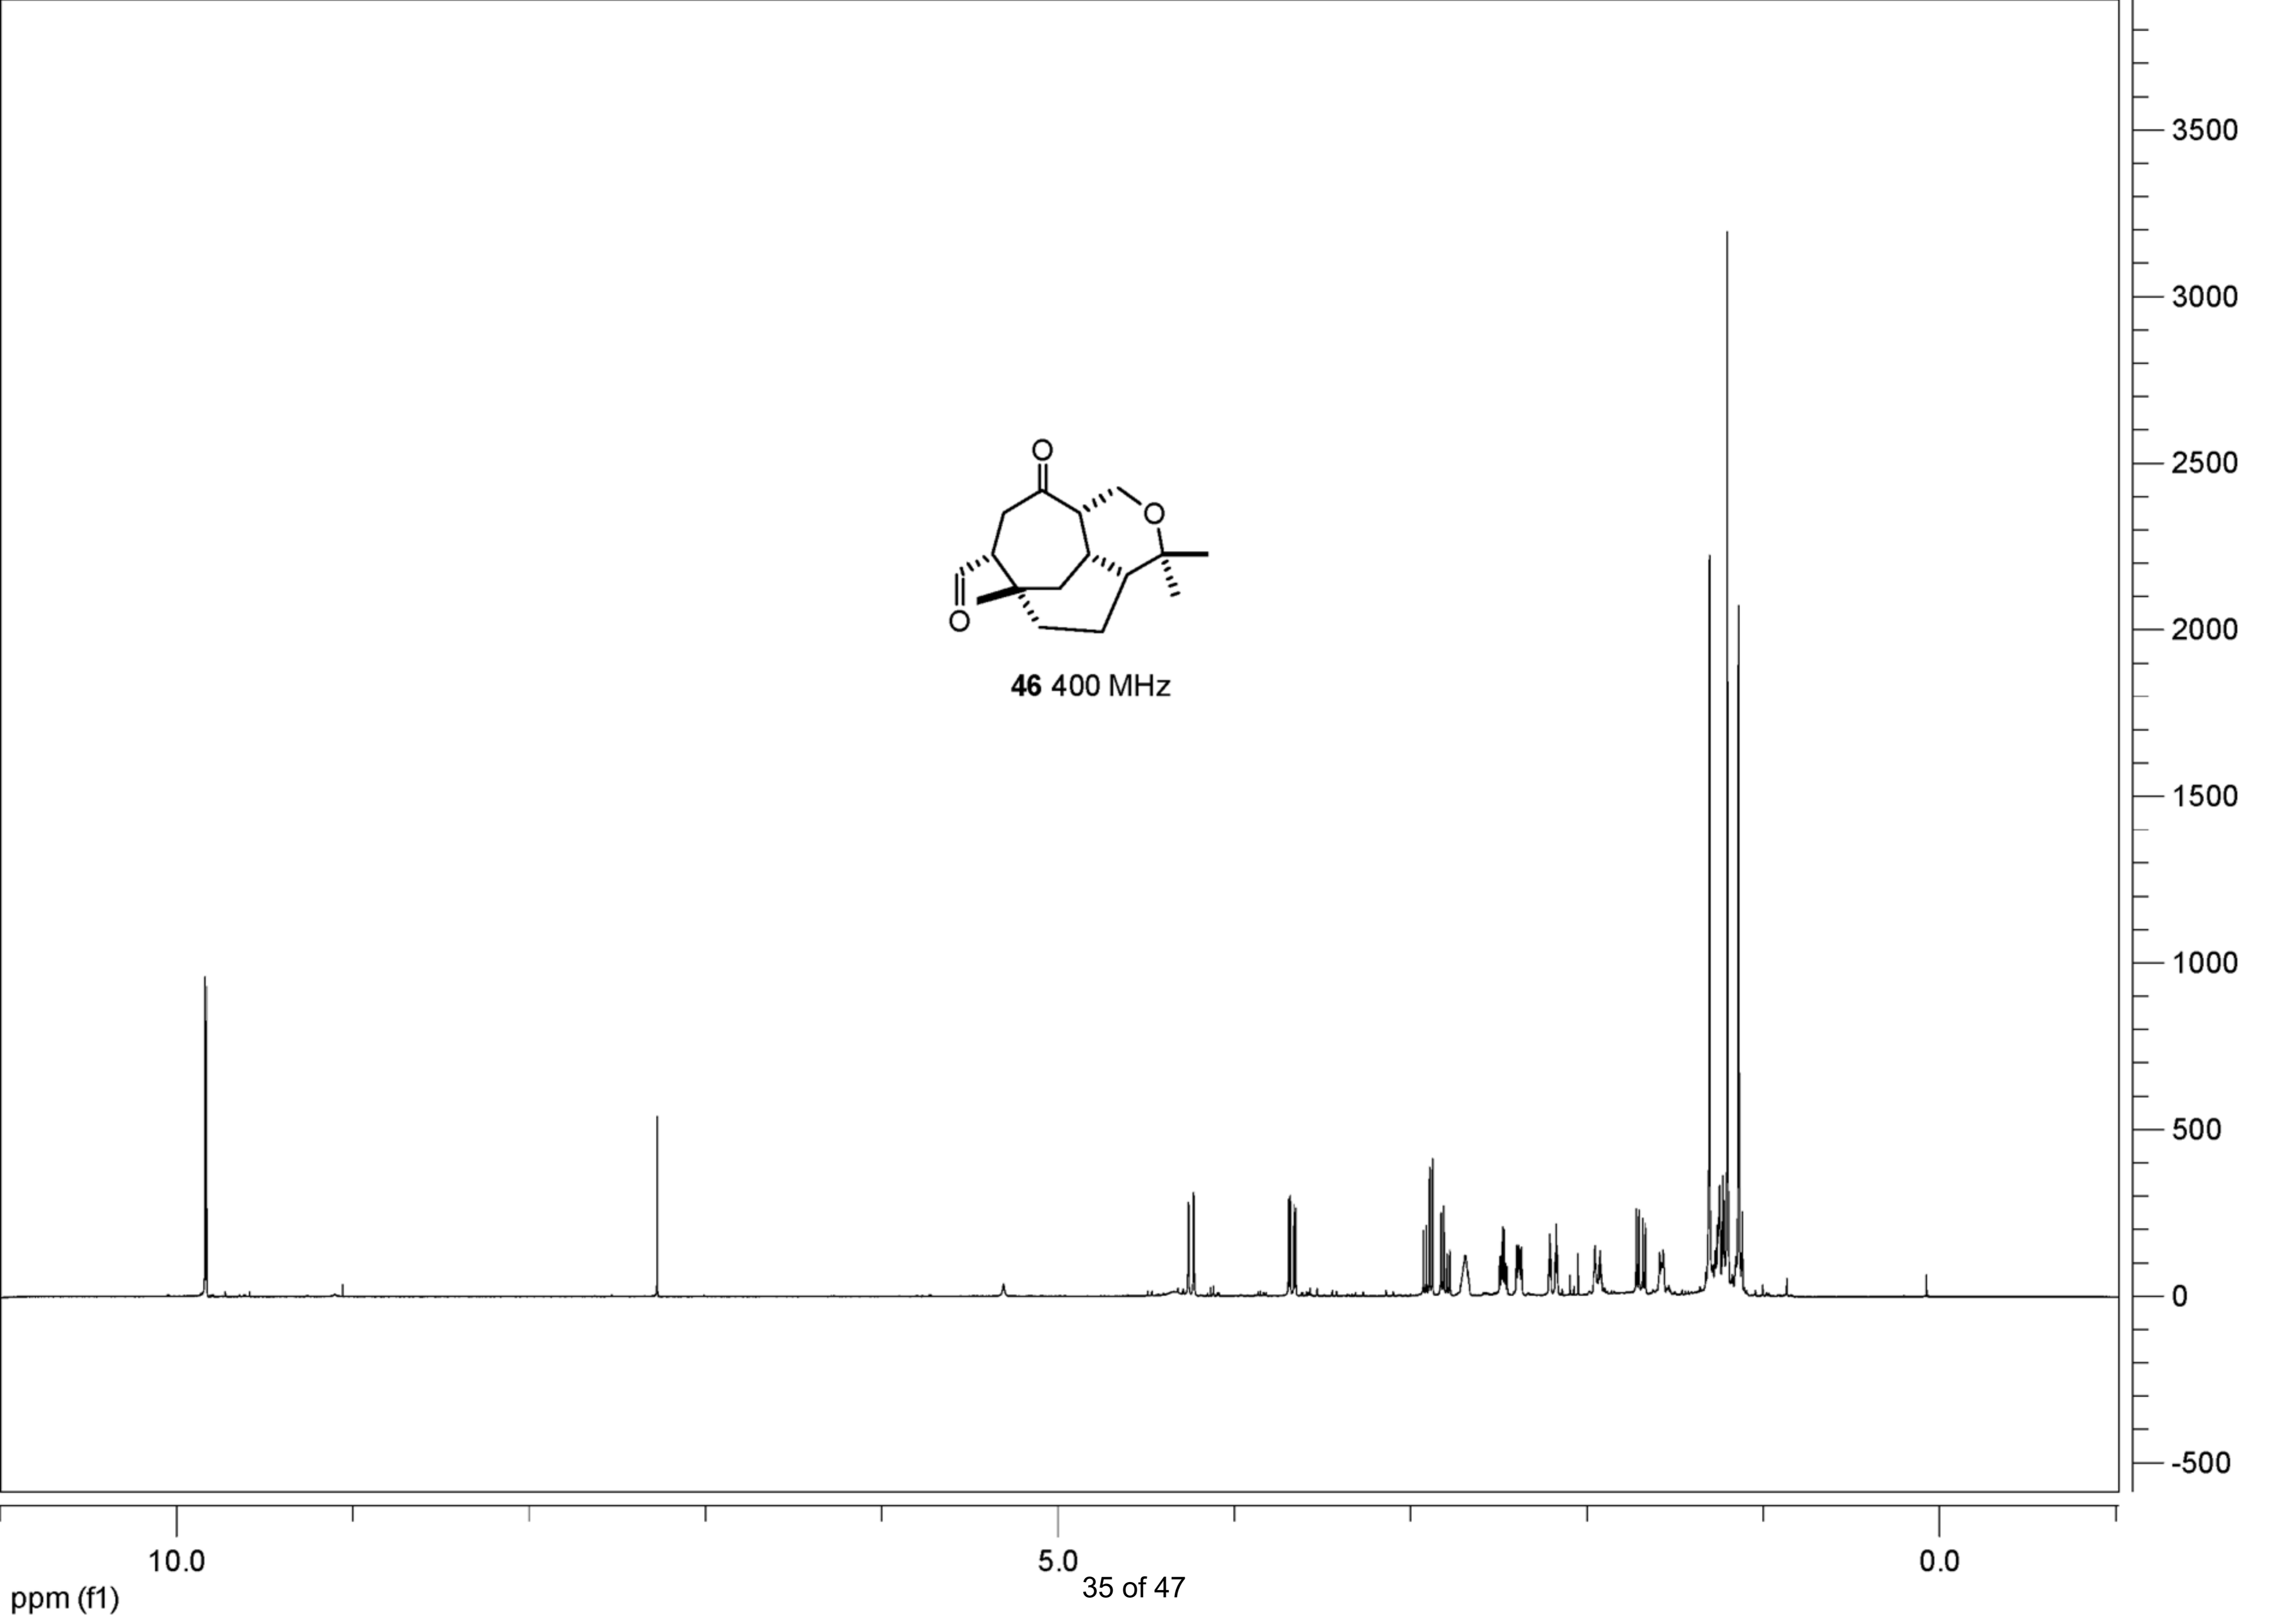

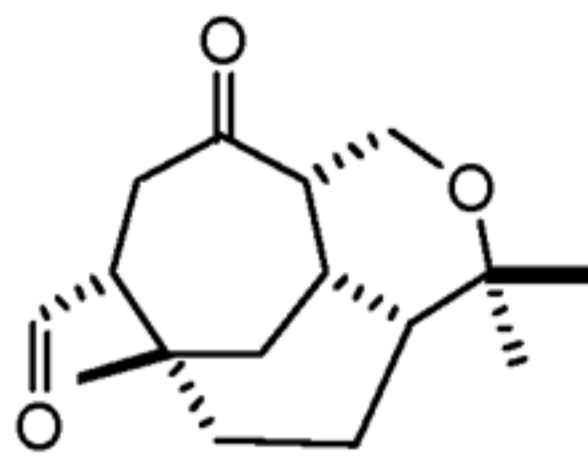

46 100 MHz

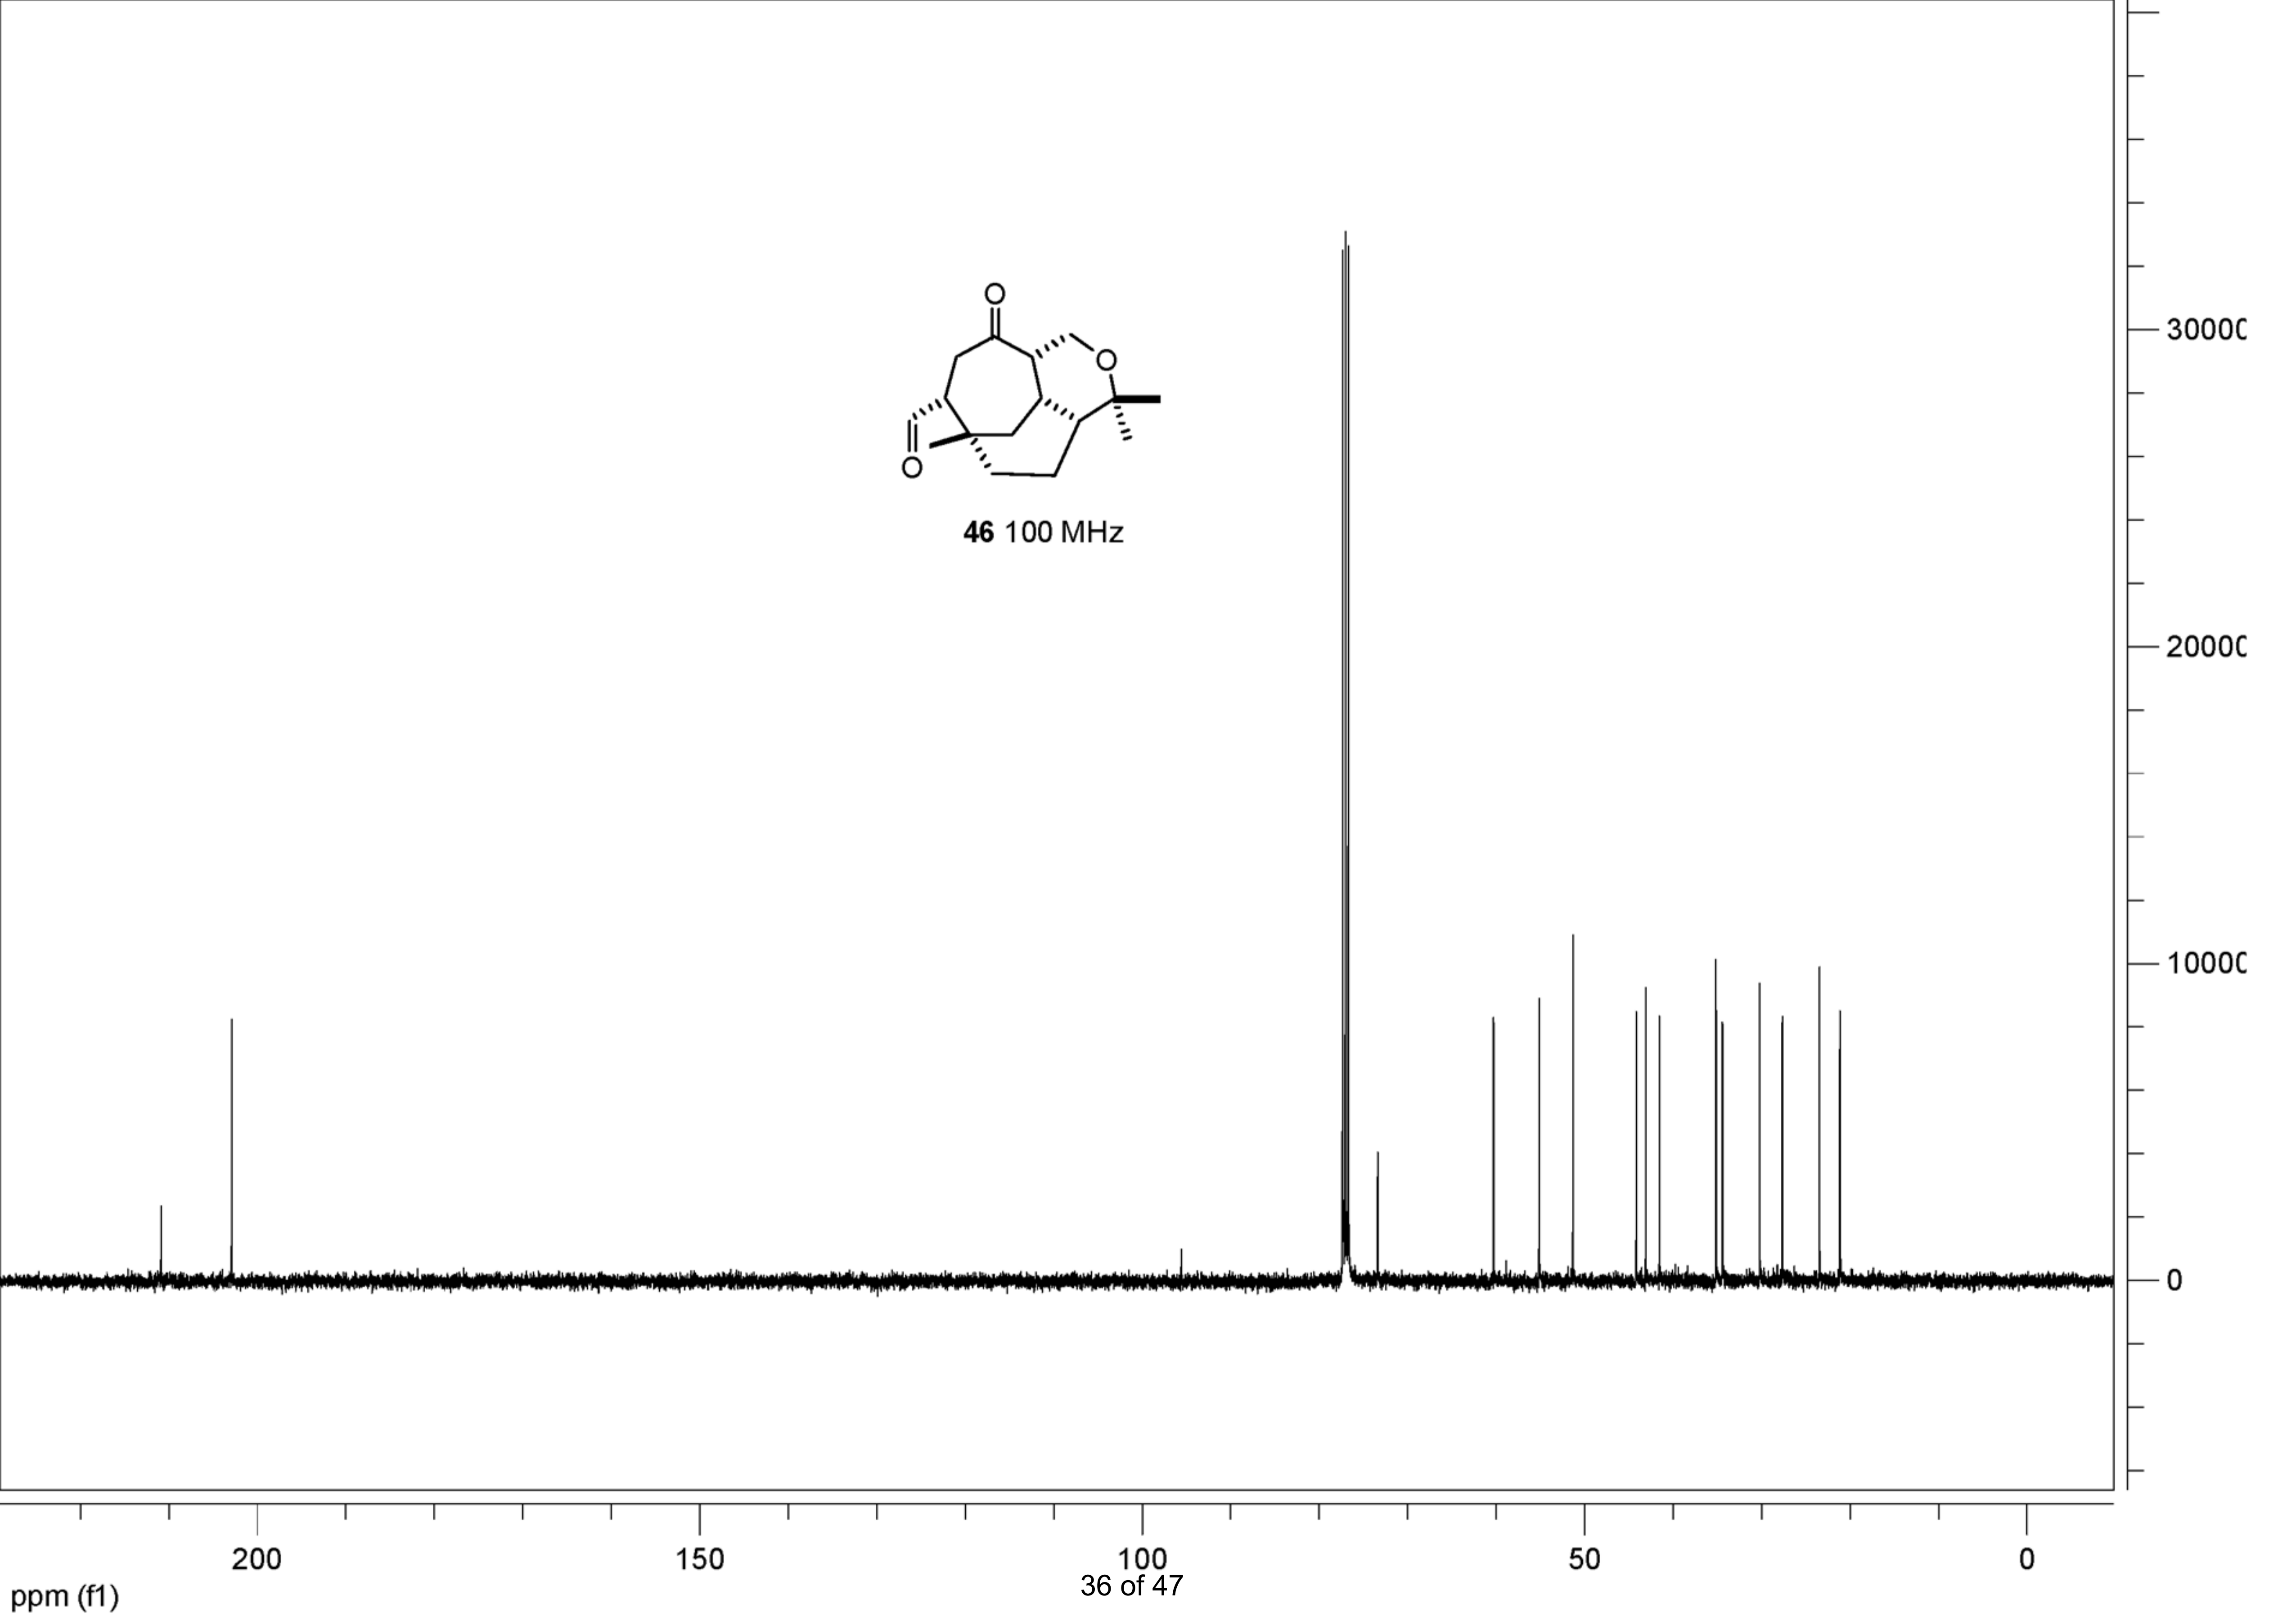

ppm (f1)

36 of 47

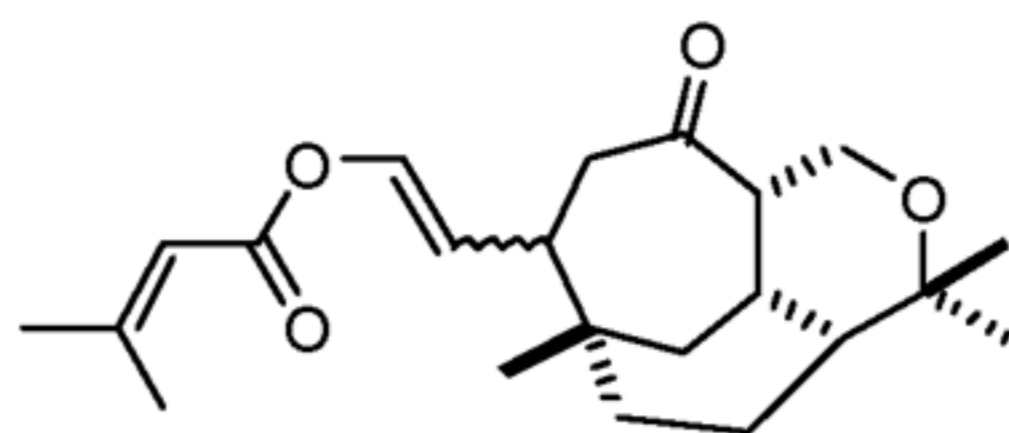

47 400 MHz

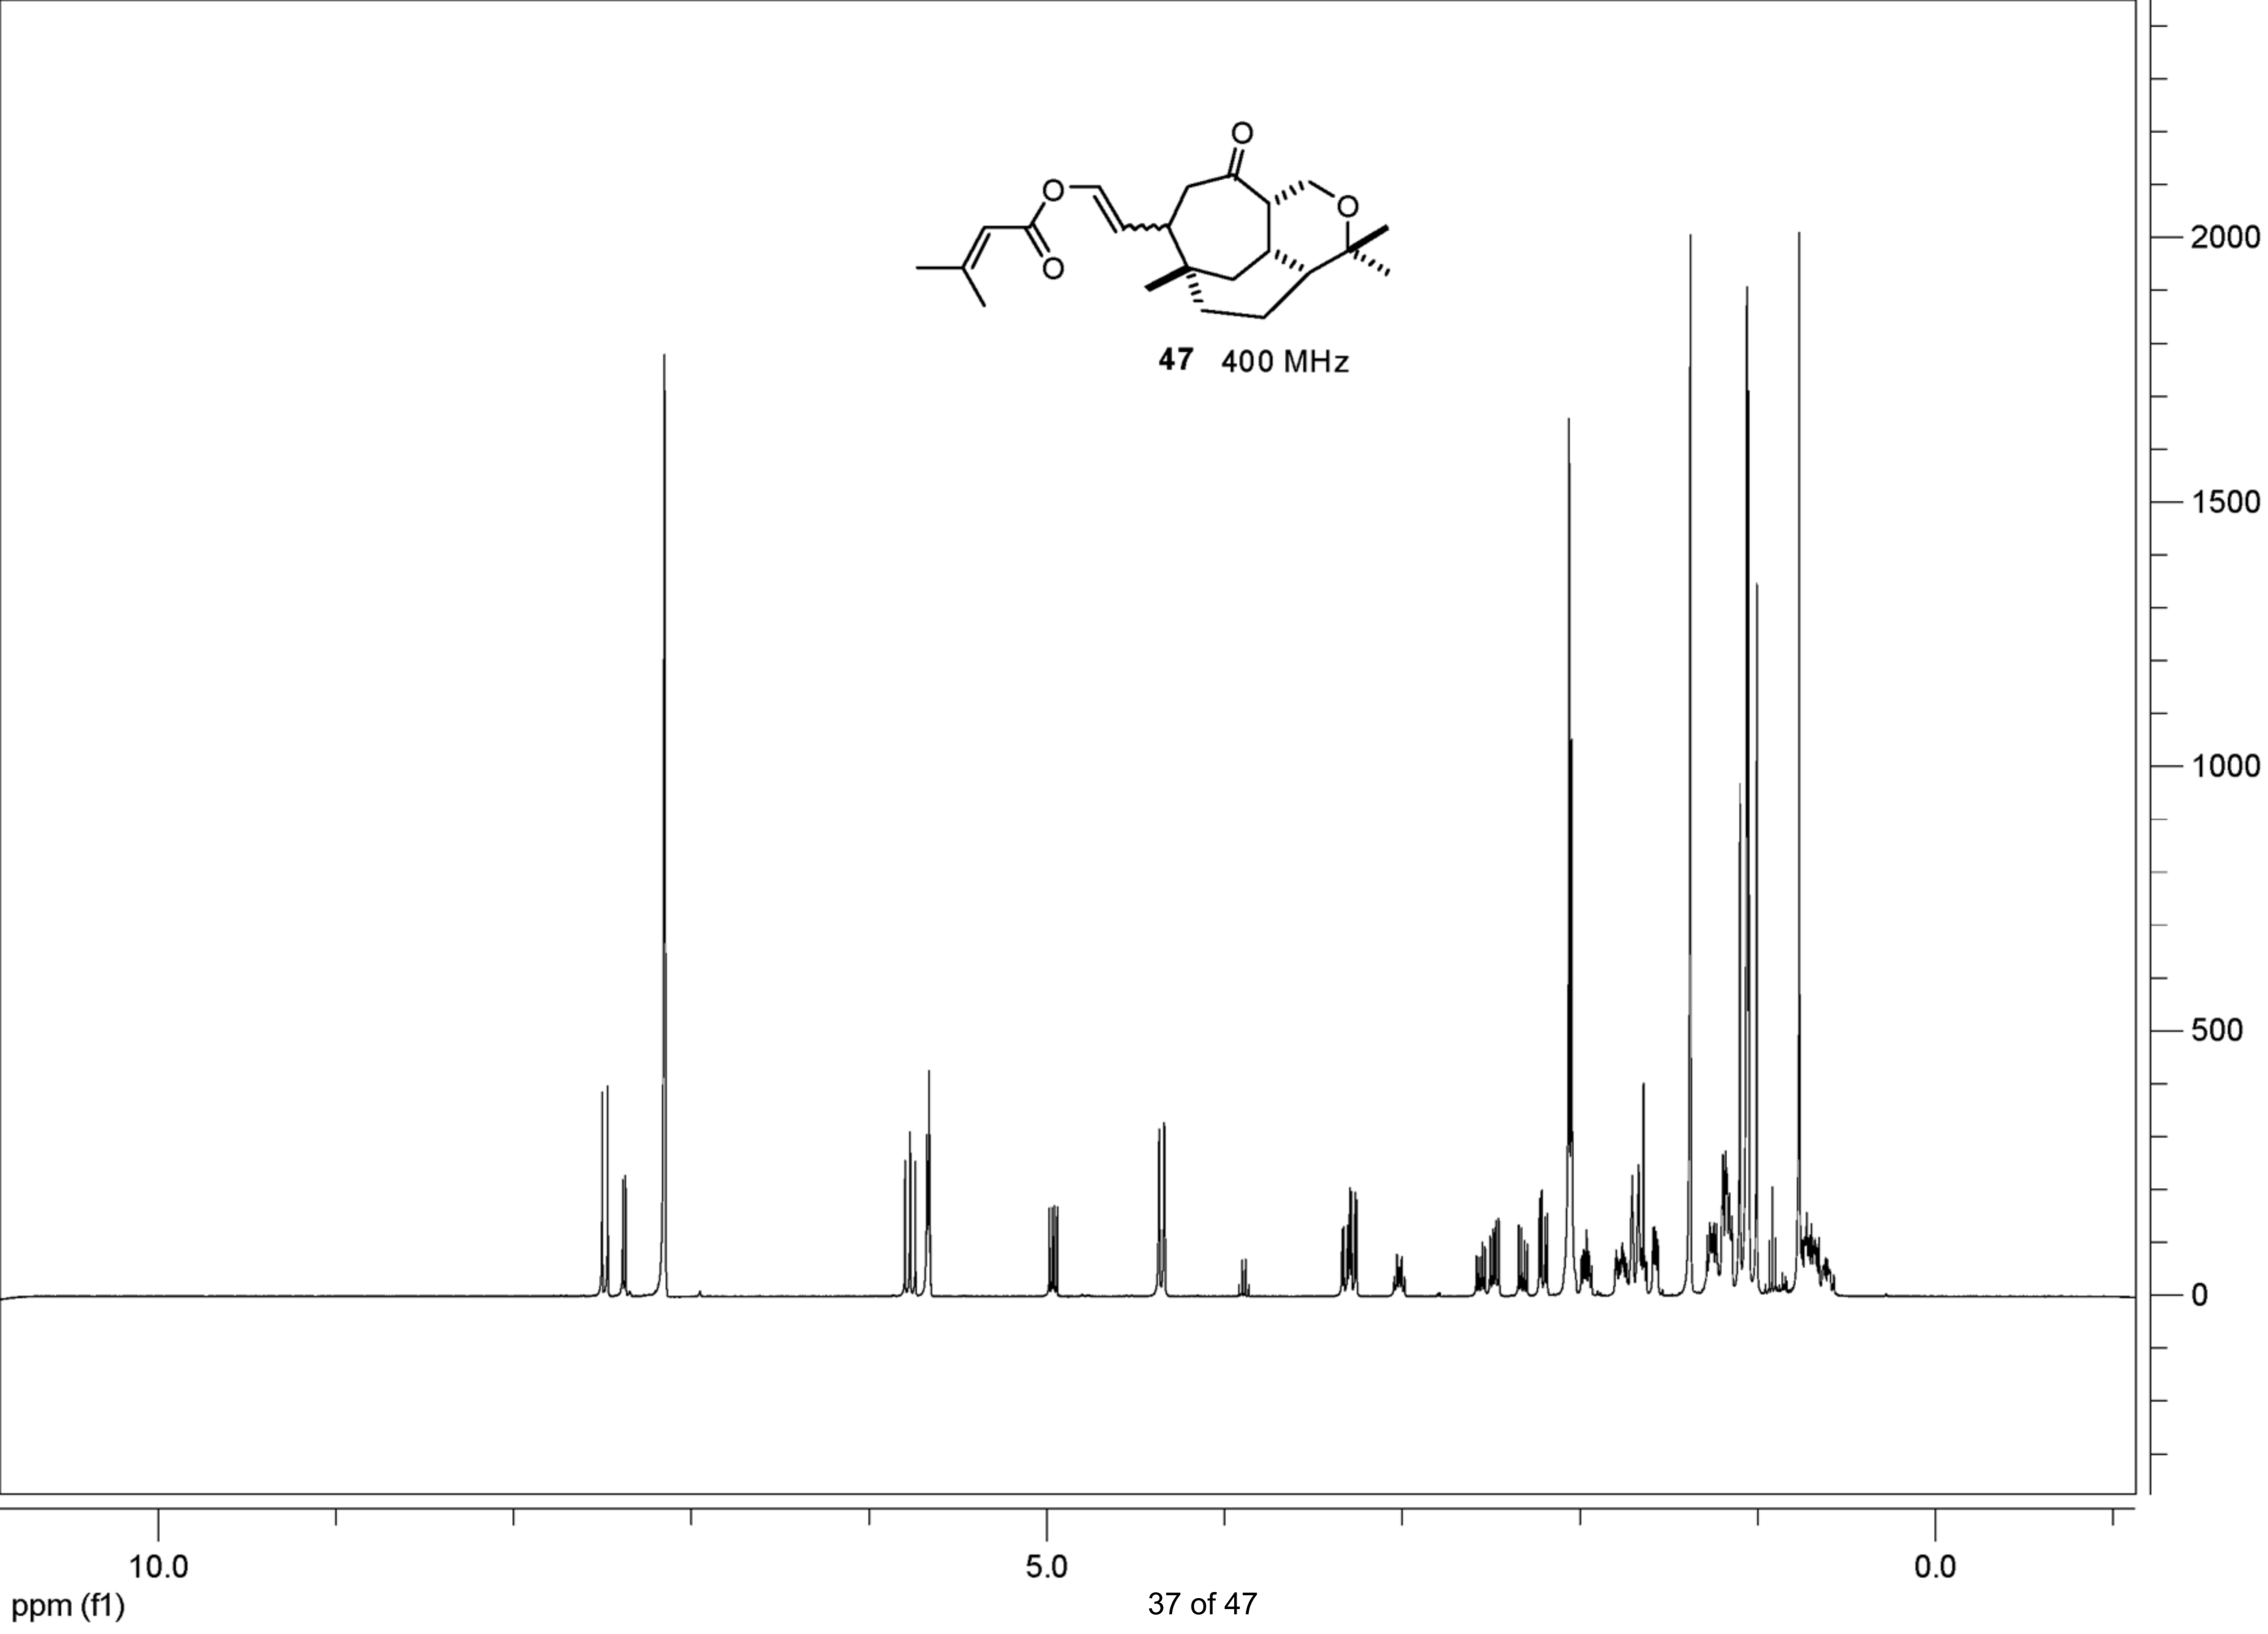

10.0

5.0

0.0

ppm (f1)

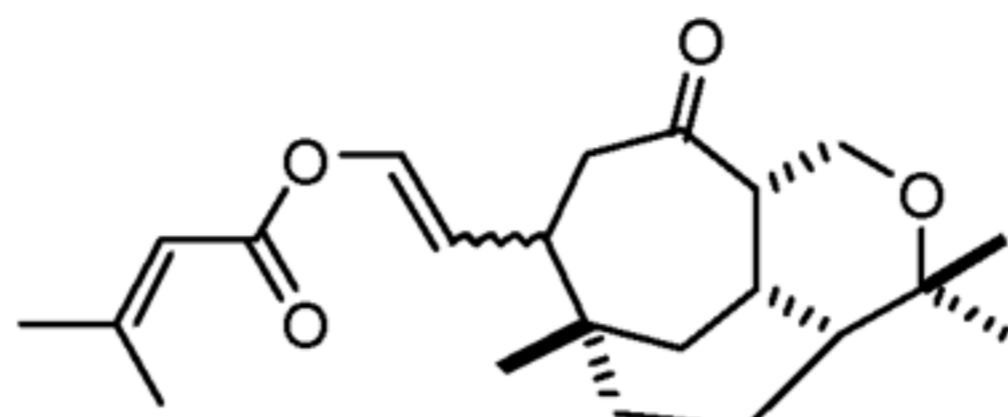

47 100 MHz

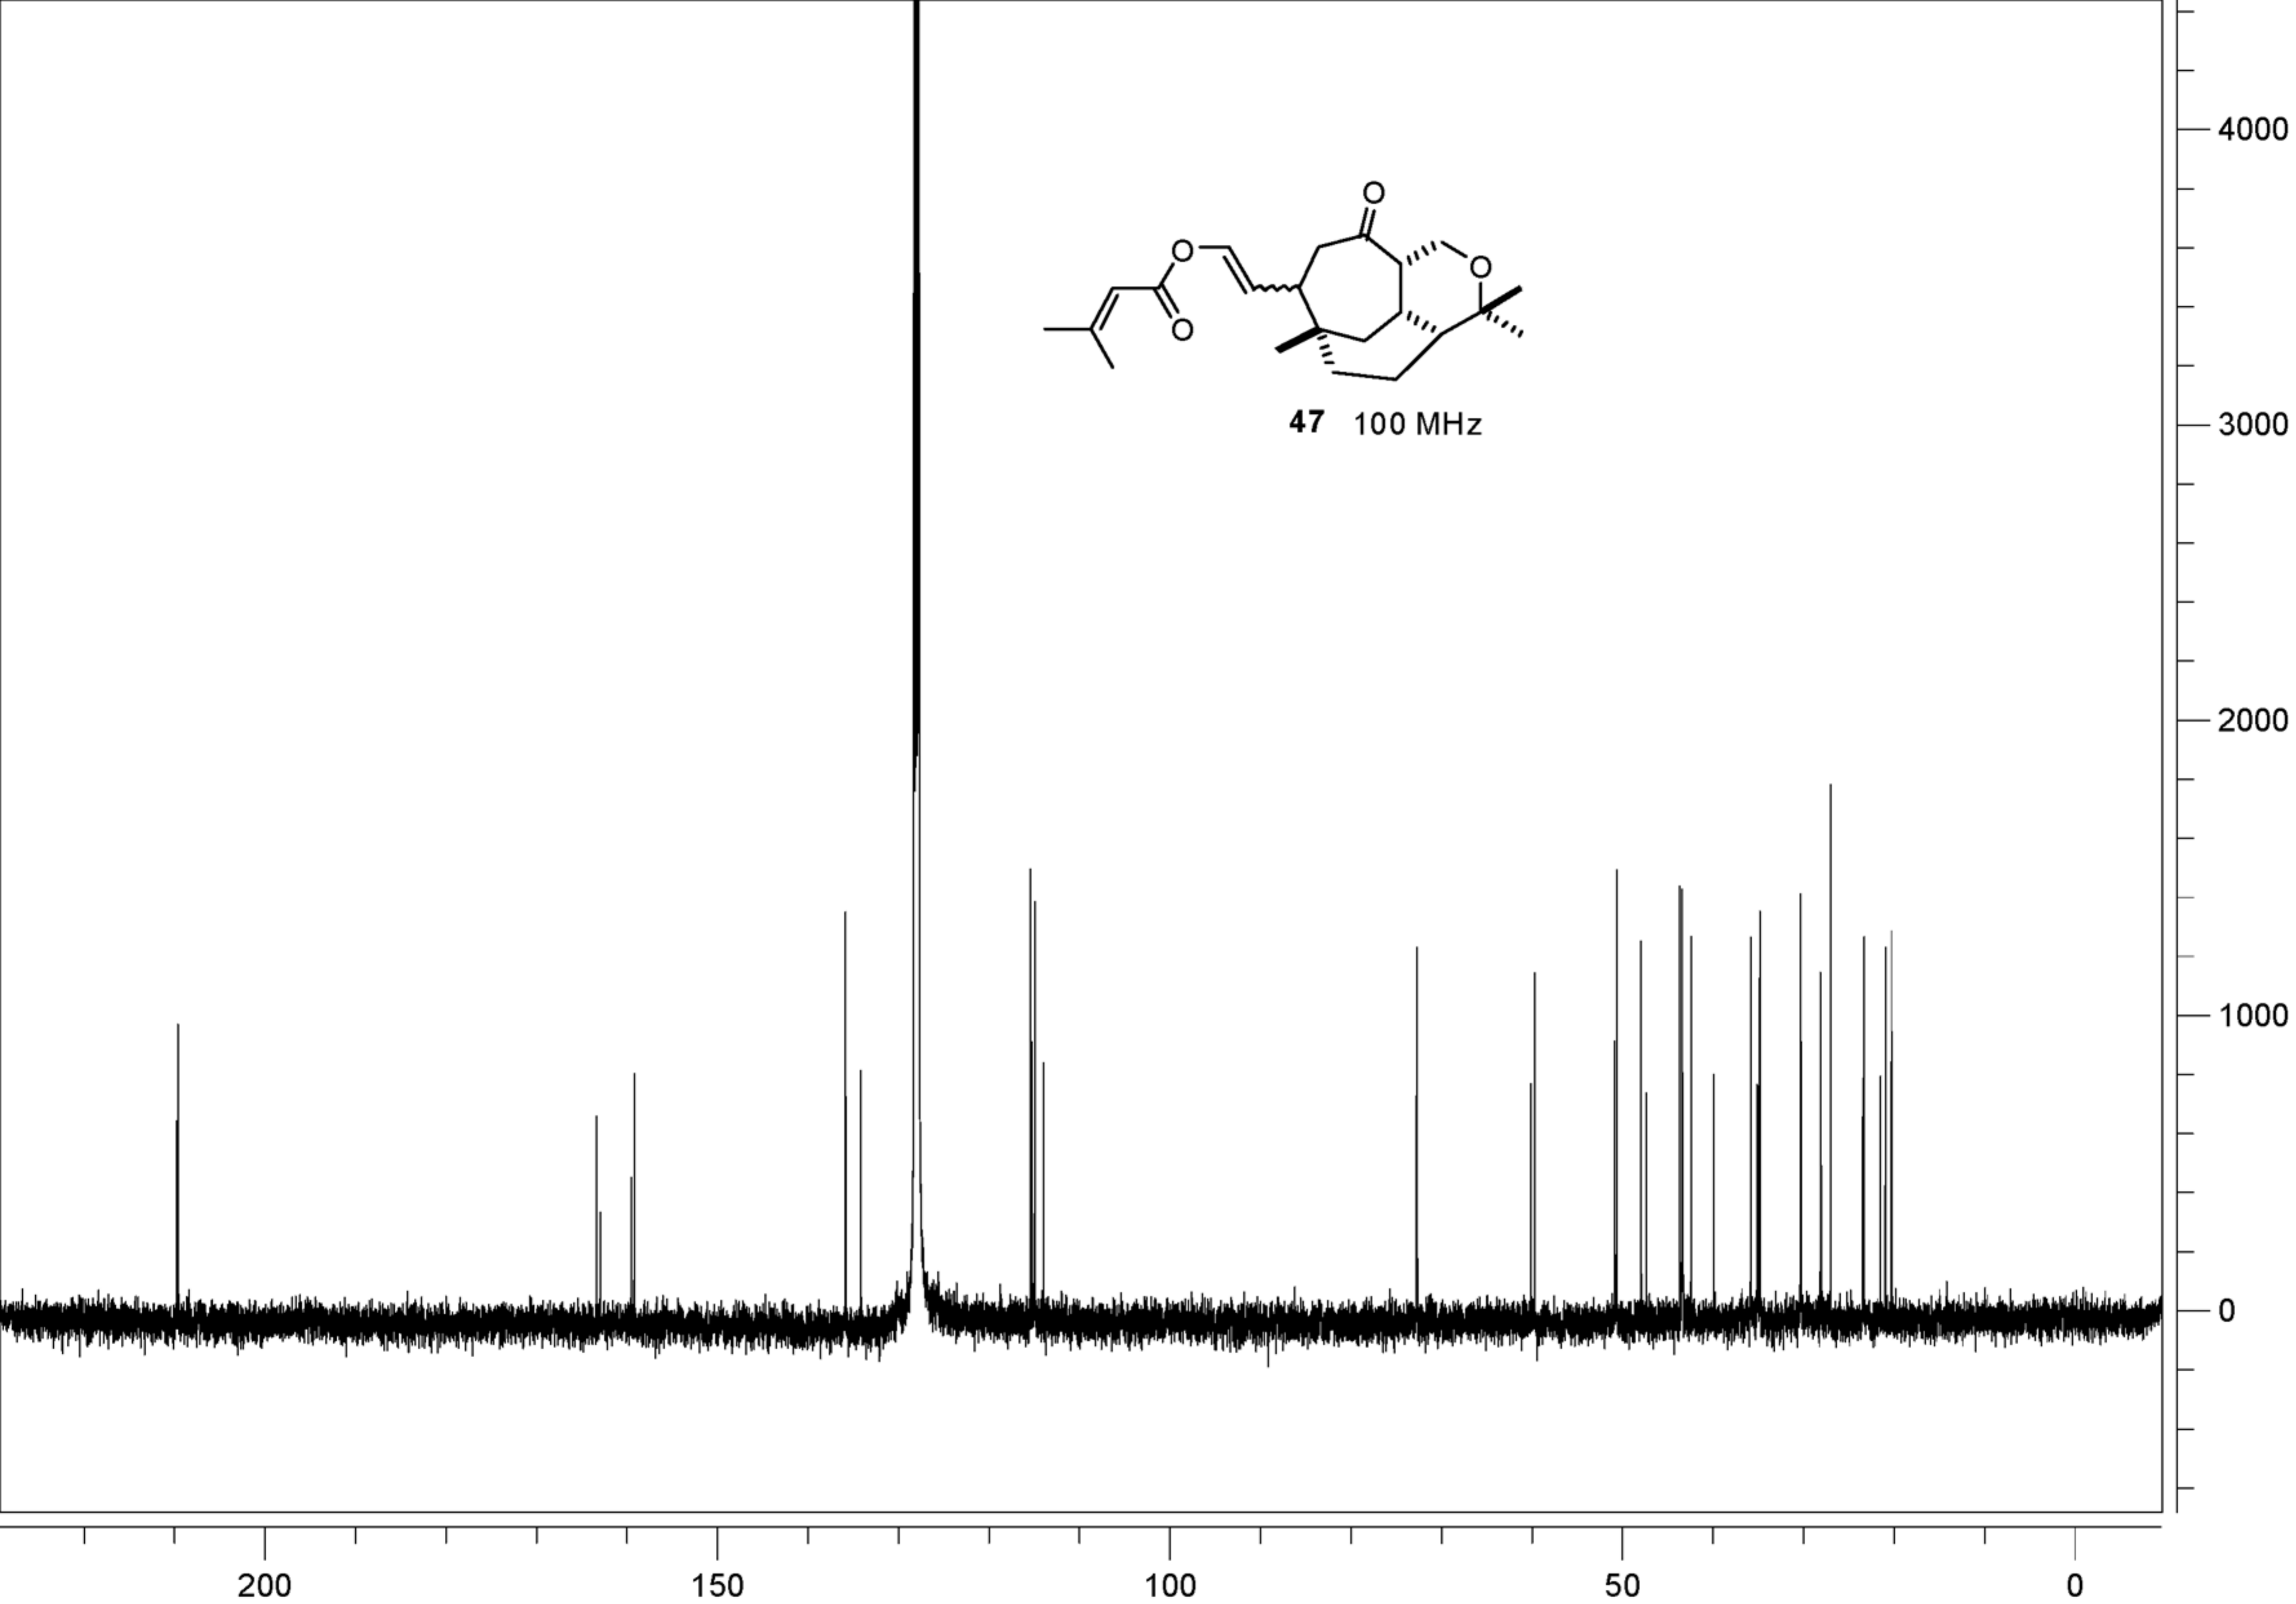

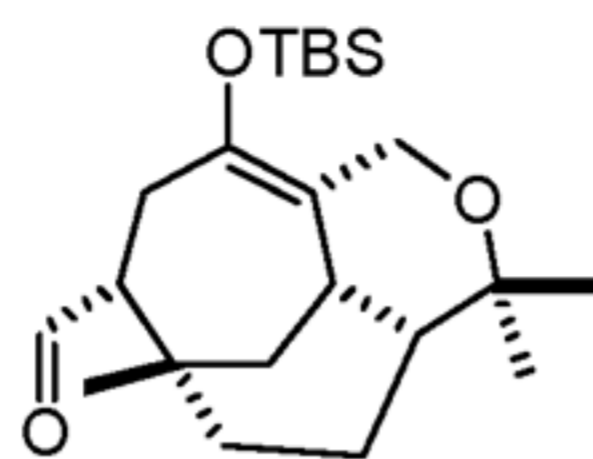

48 400 MHz

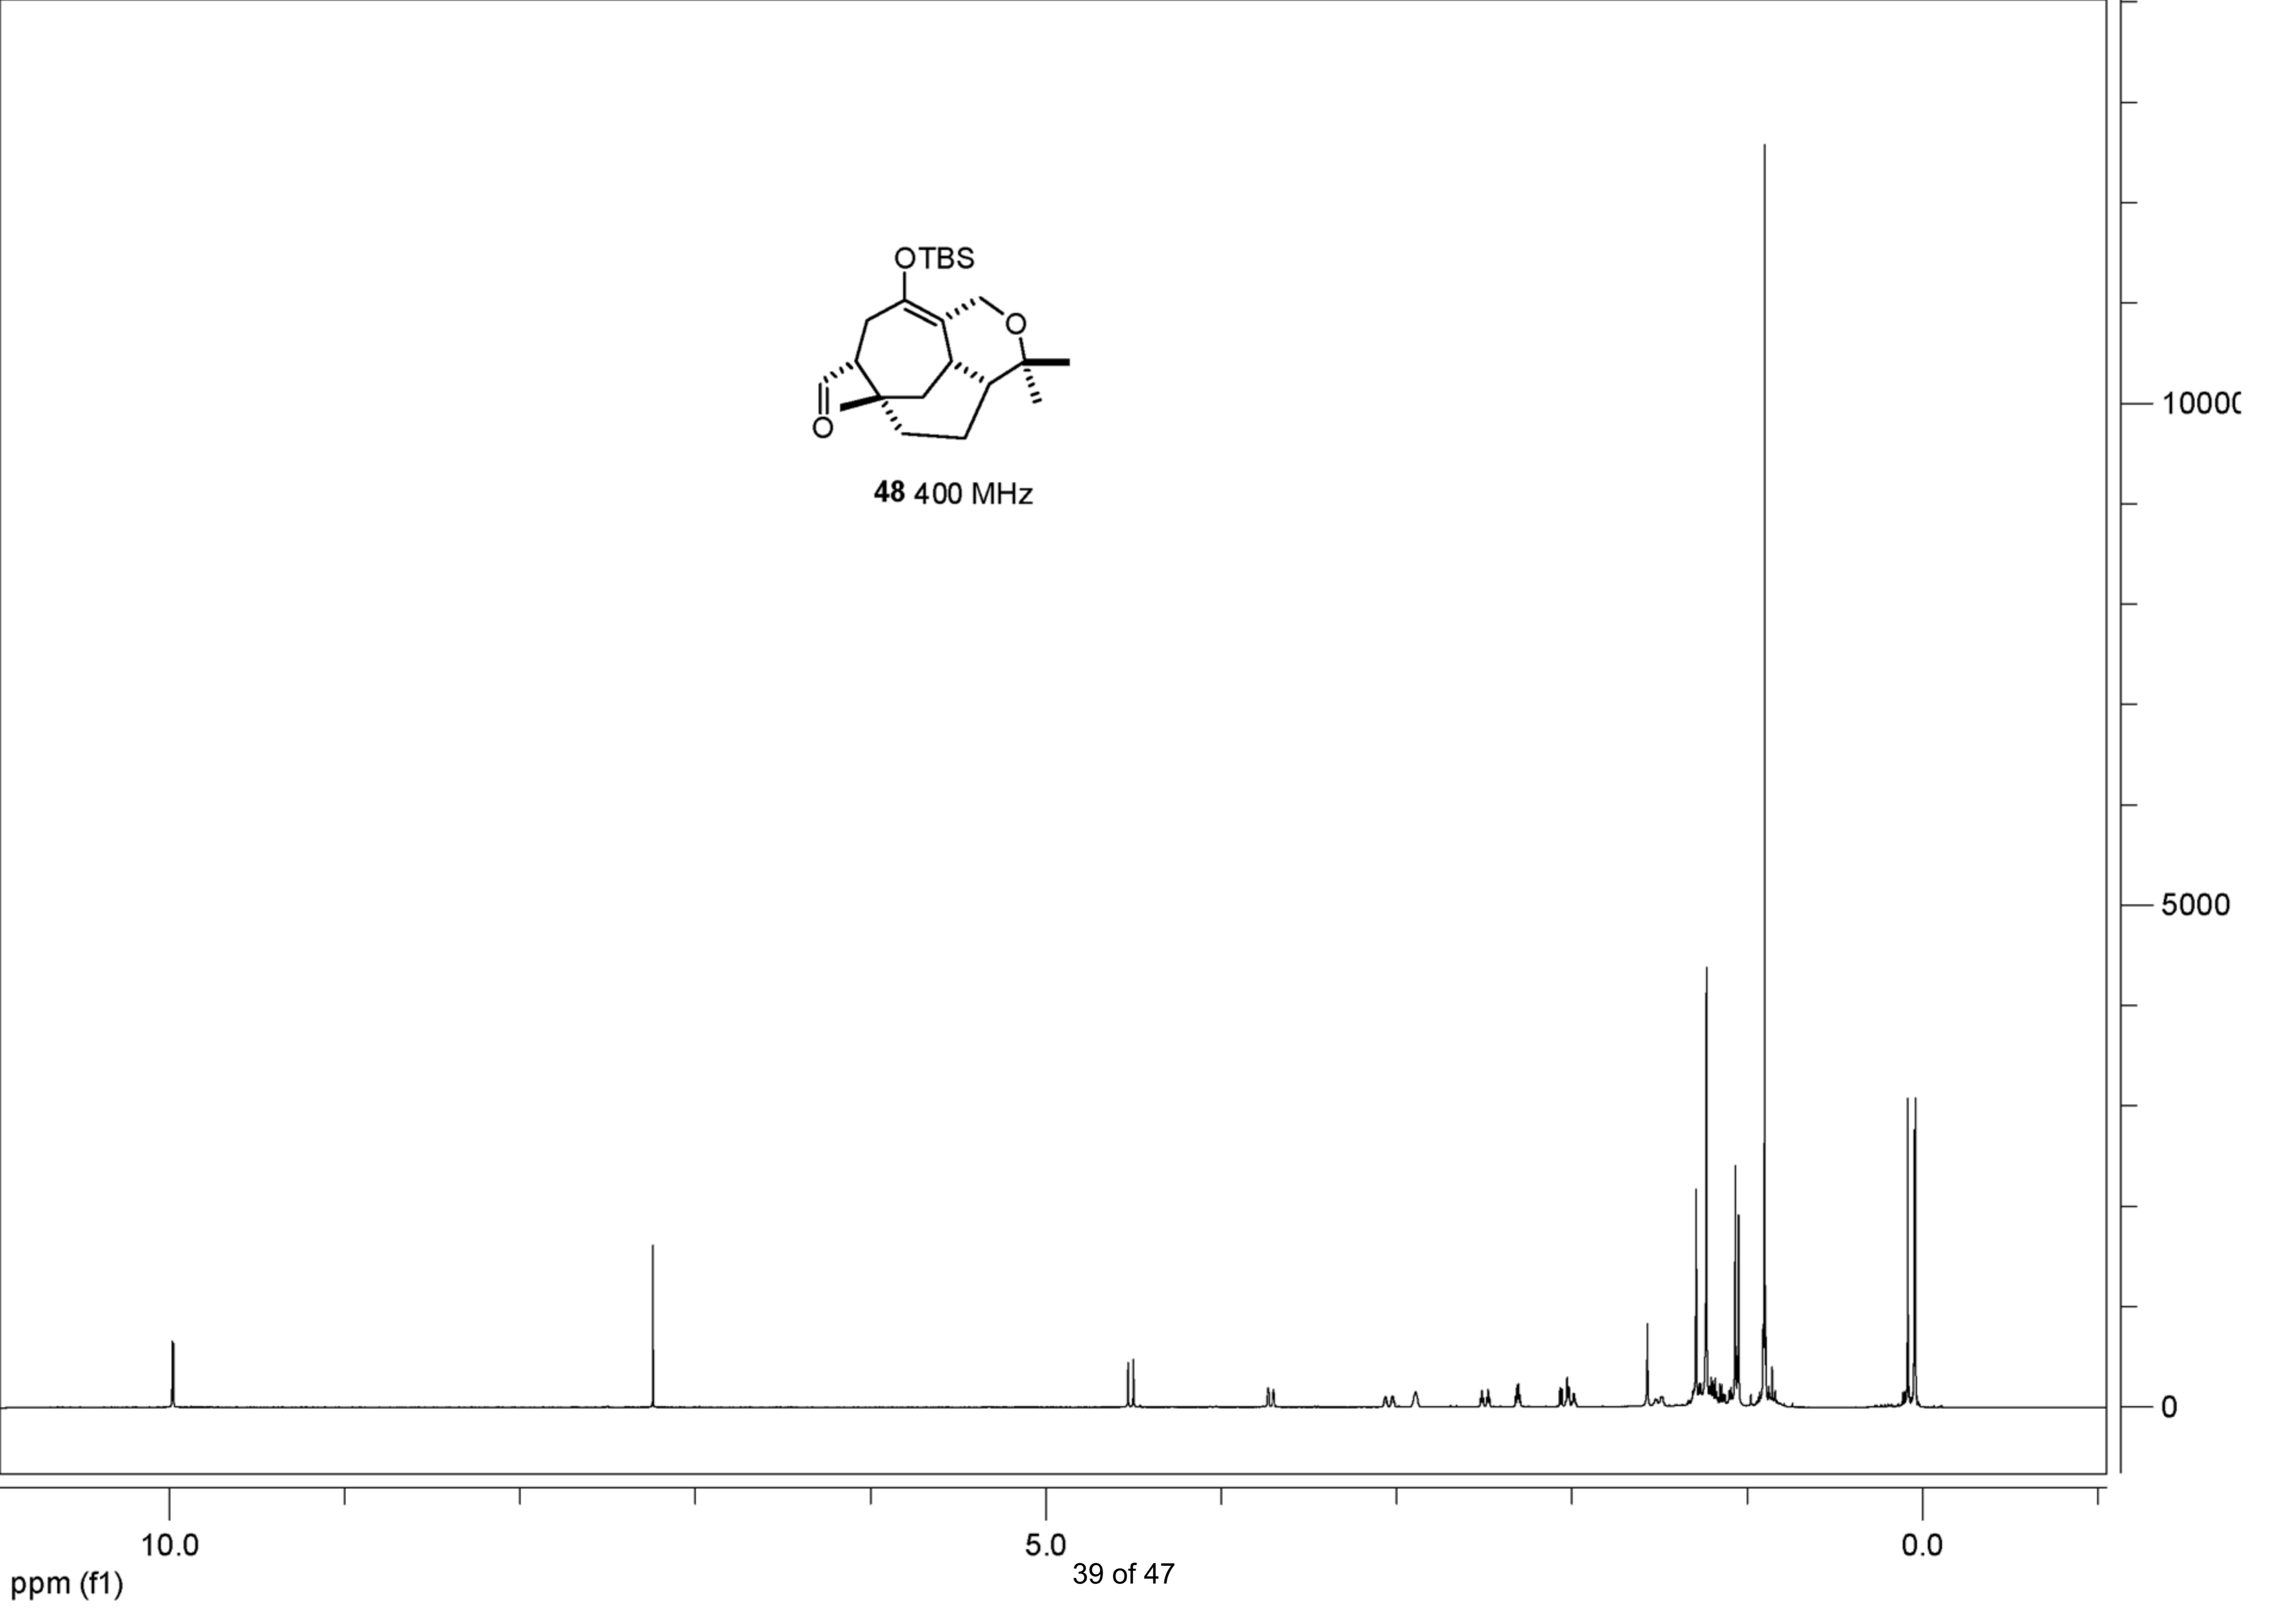

ppm (f1)



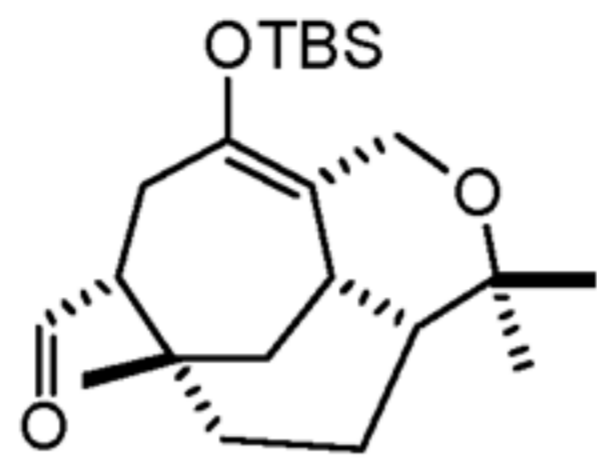

48 100 MHz

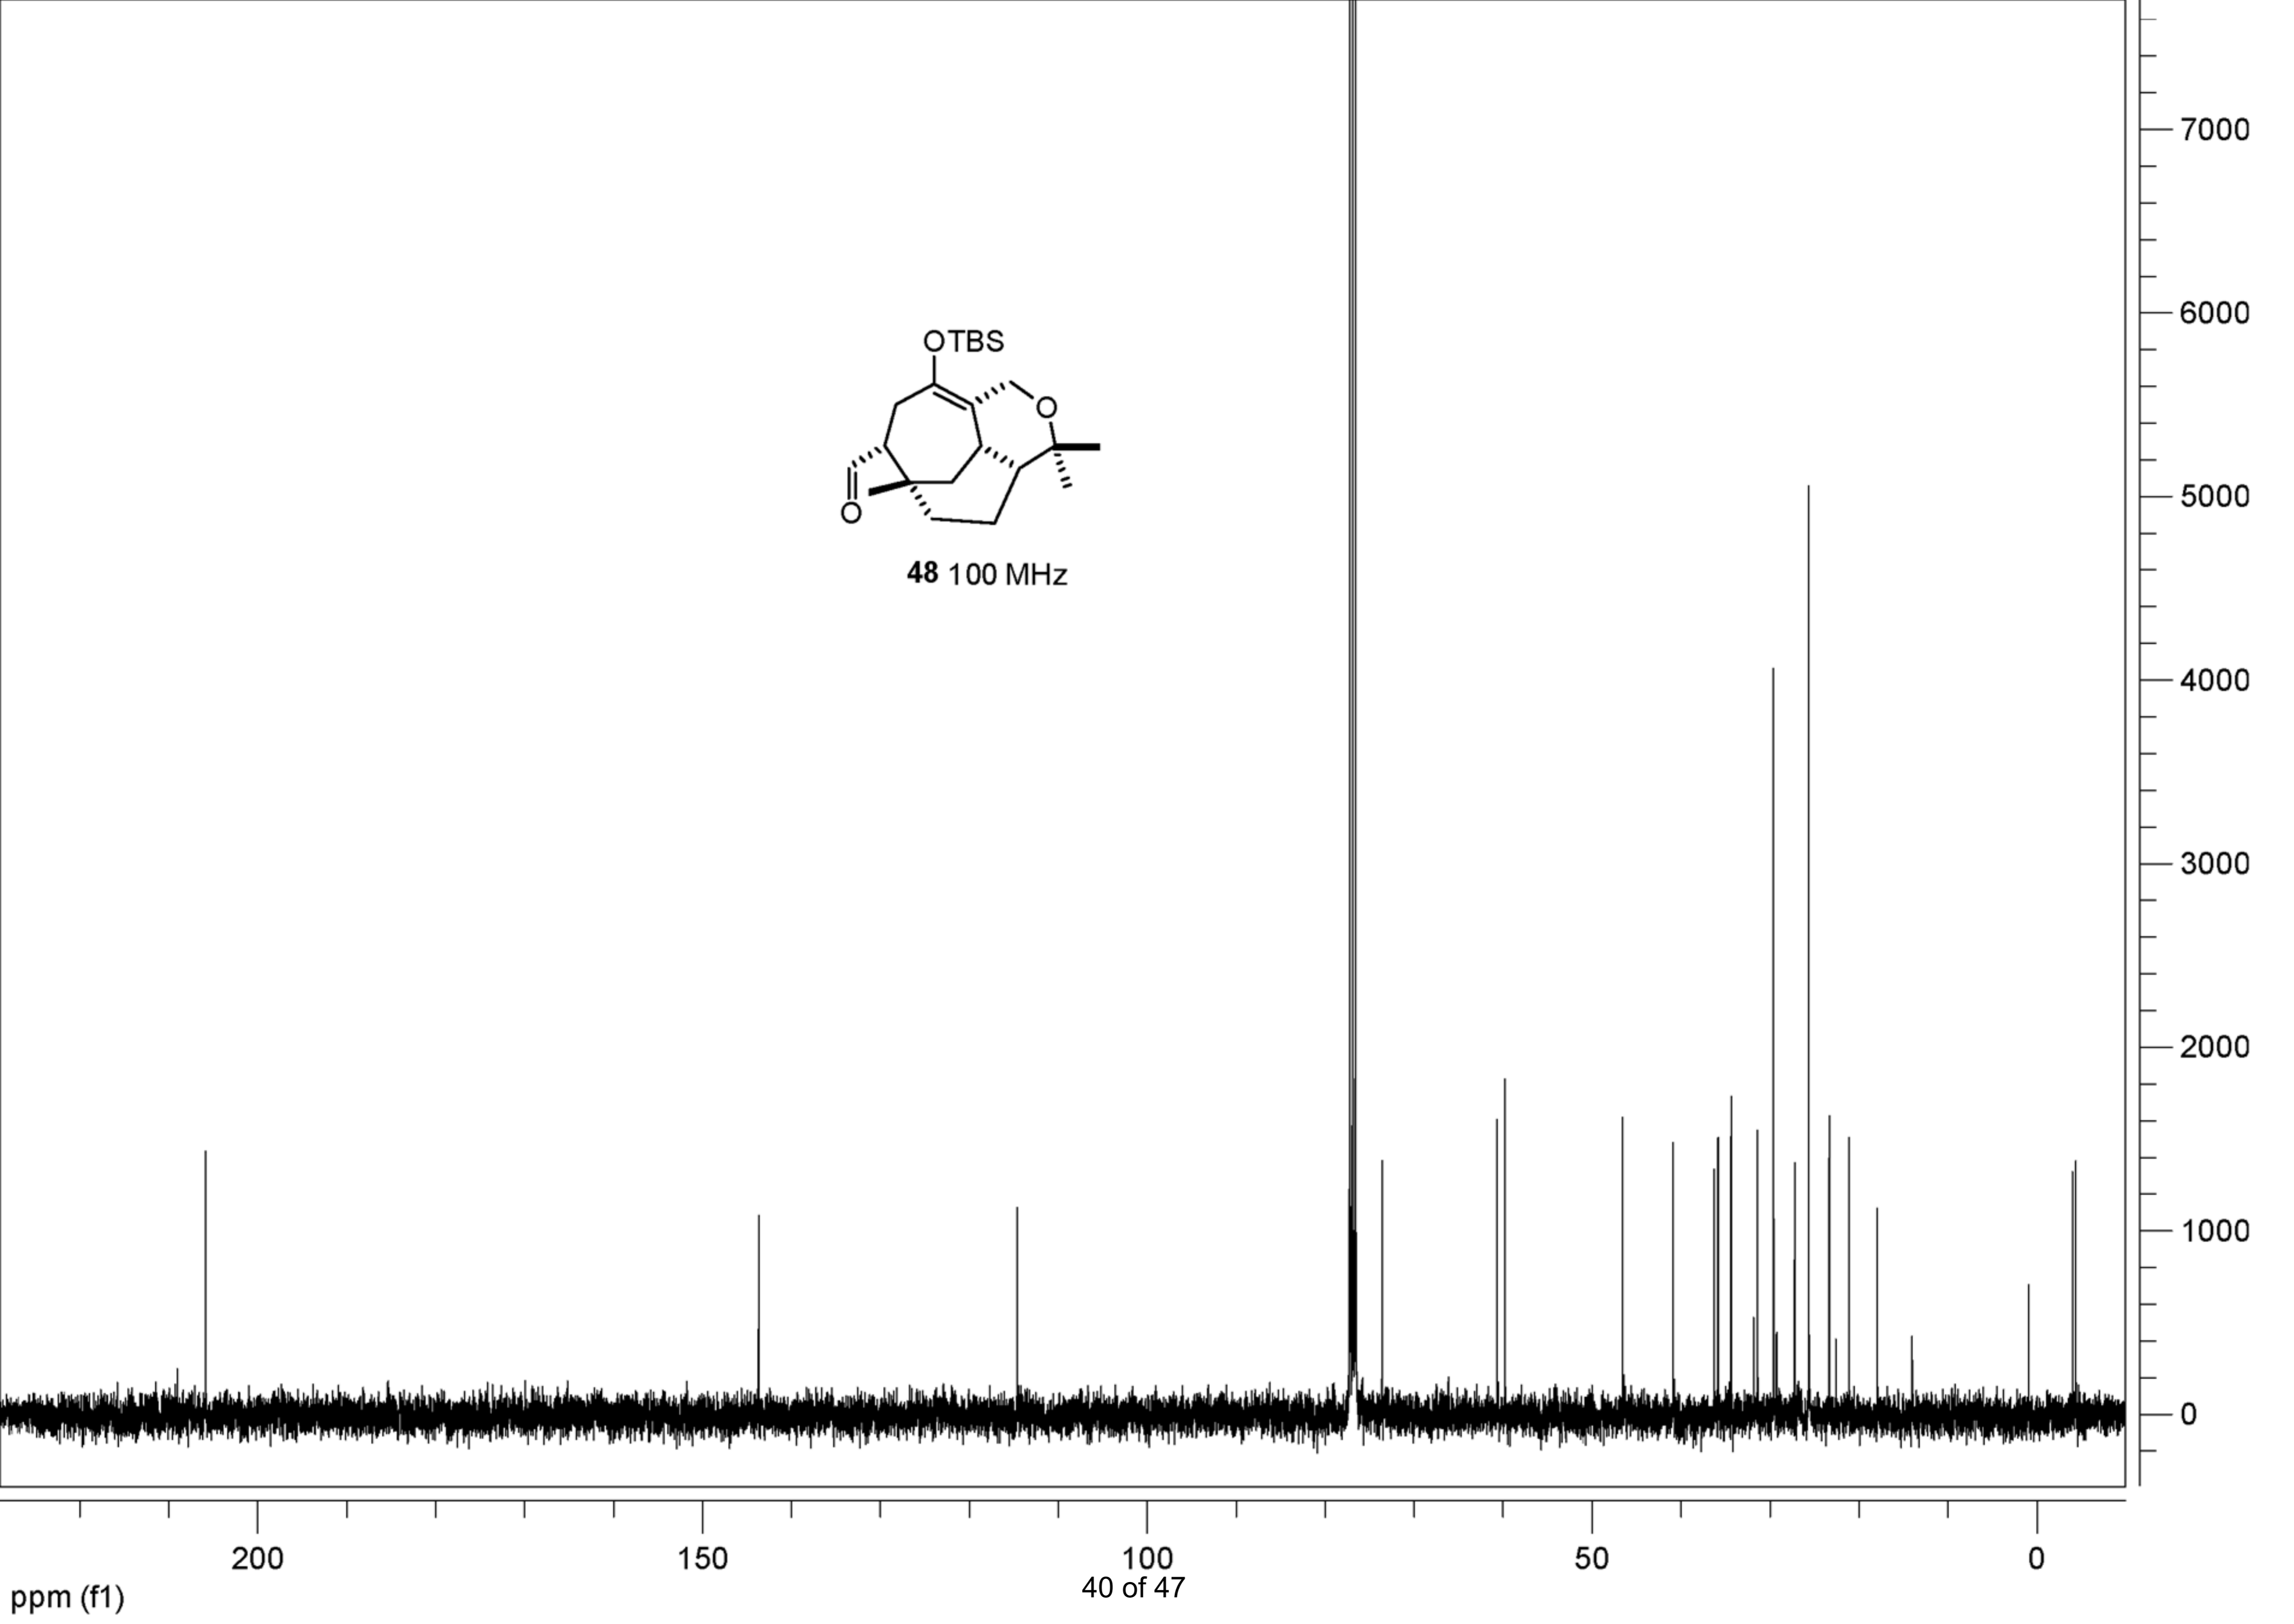

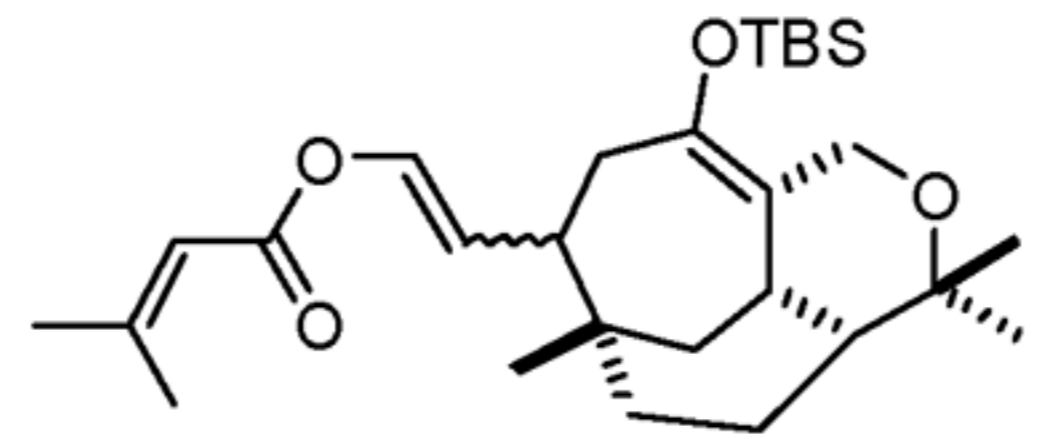

49 400 MHz

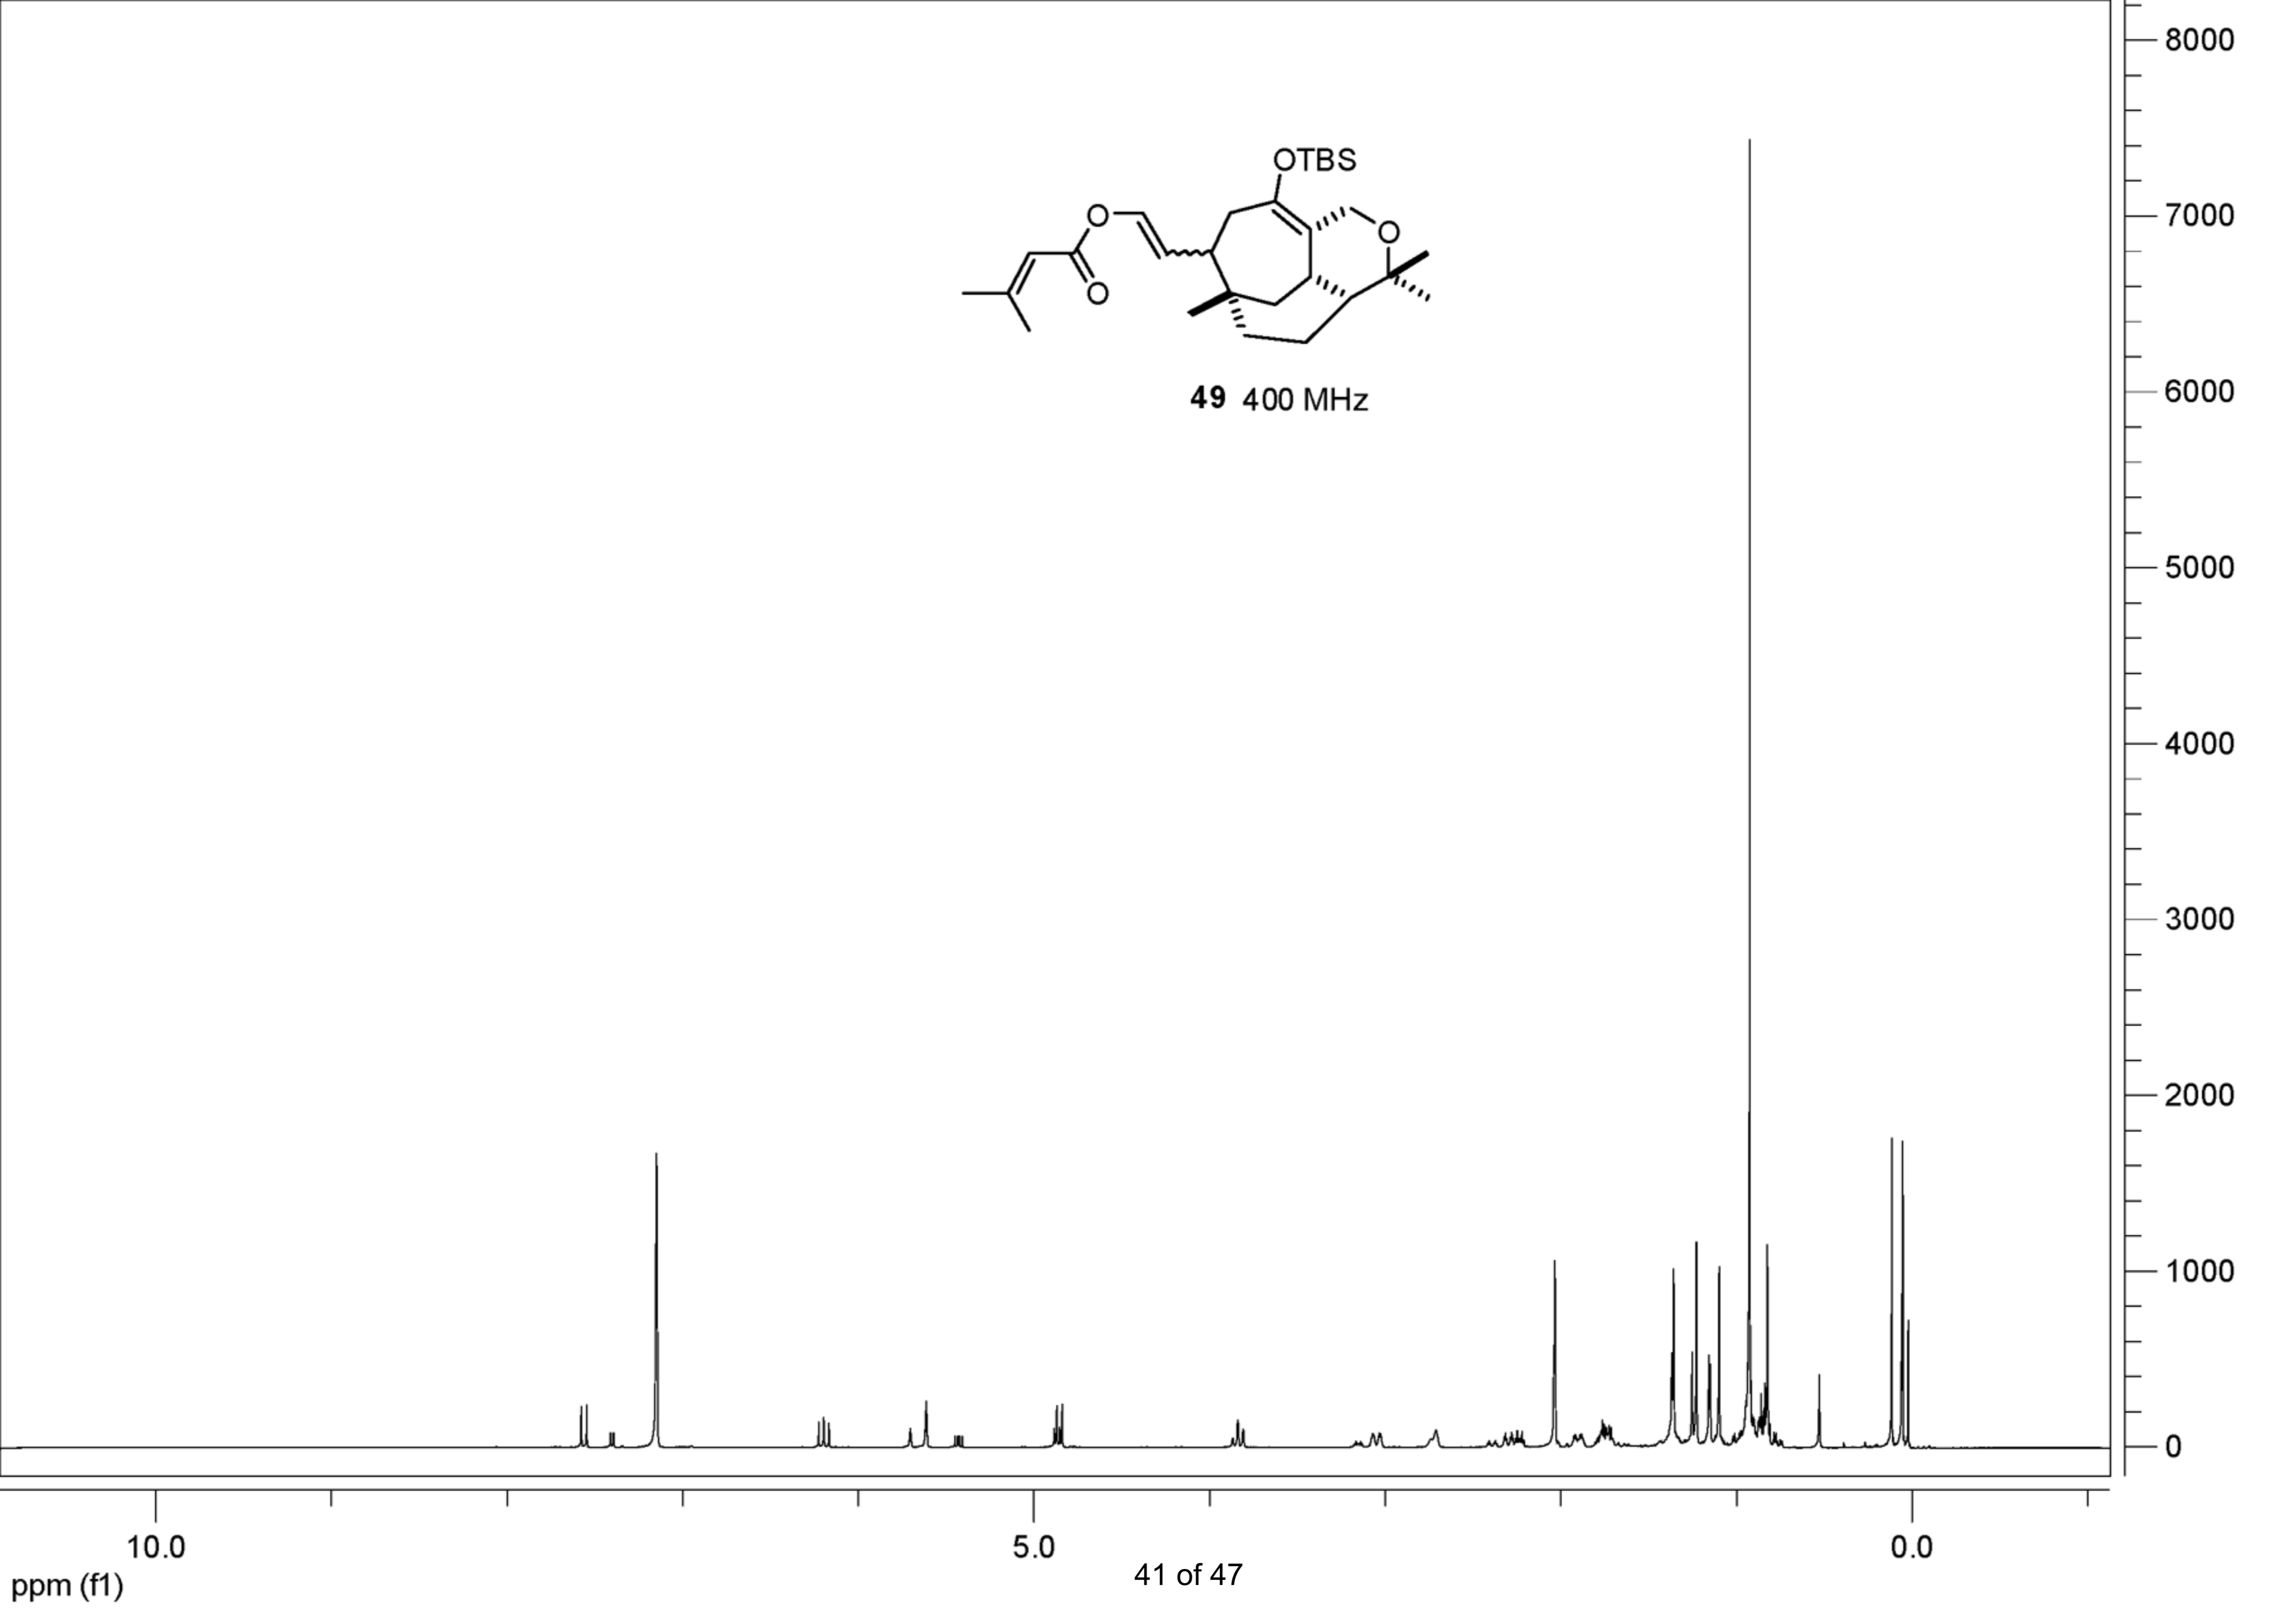

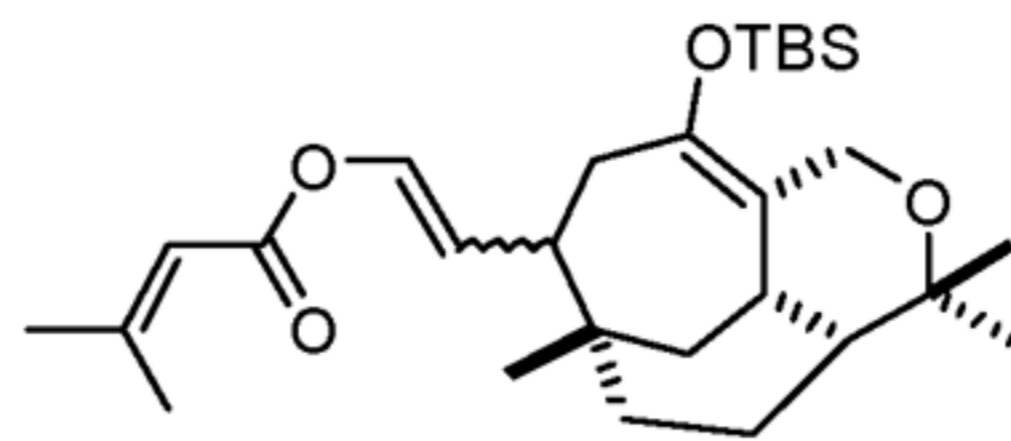

49 100 MHz

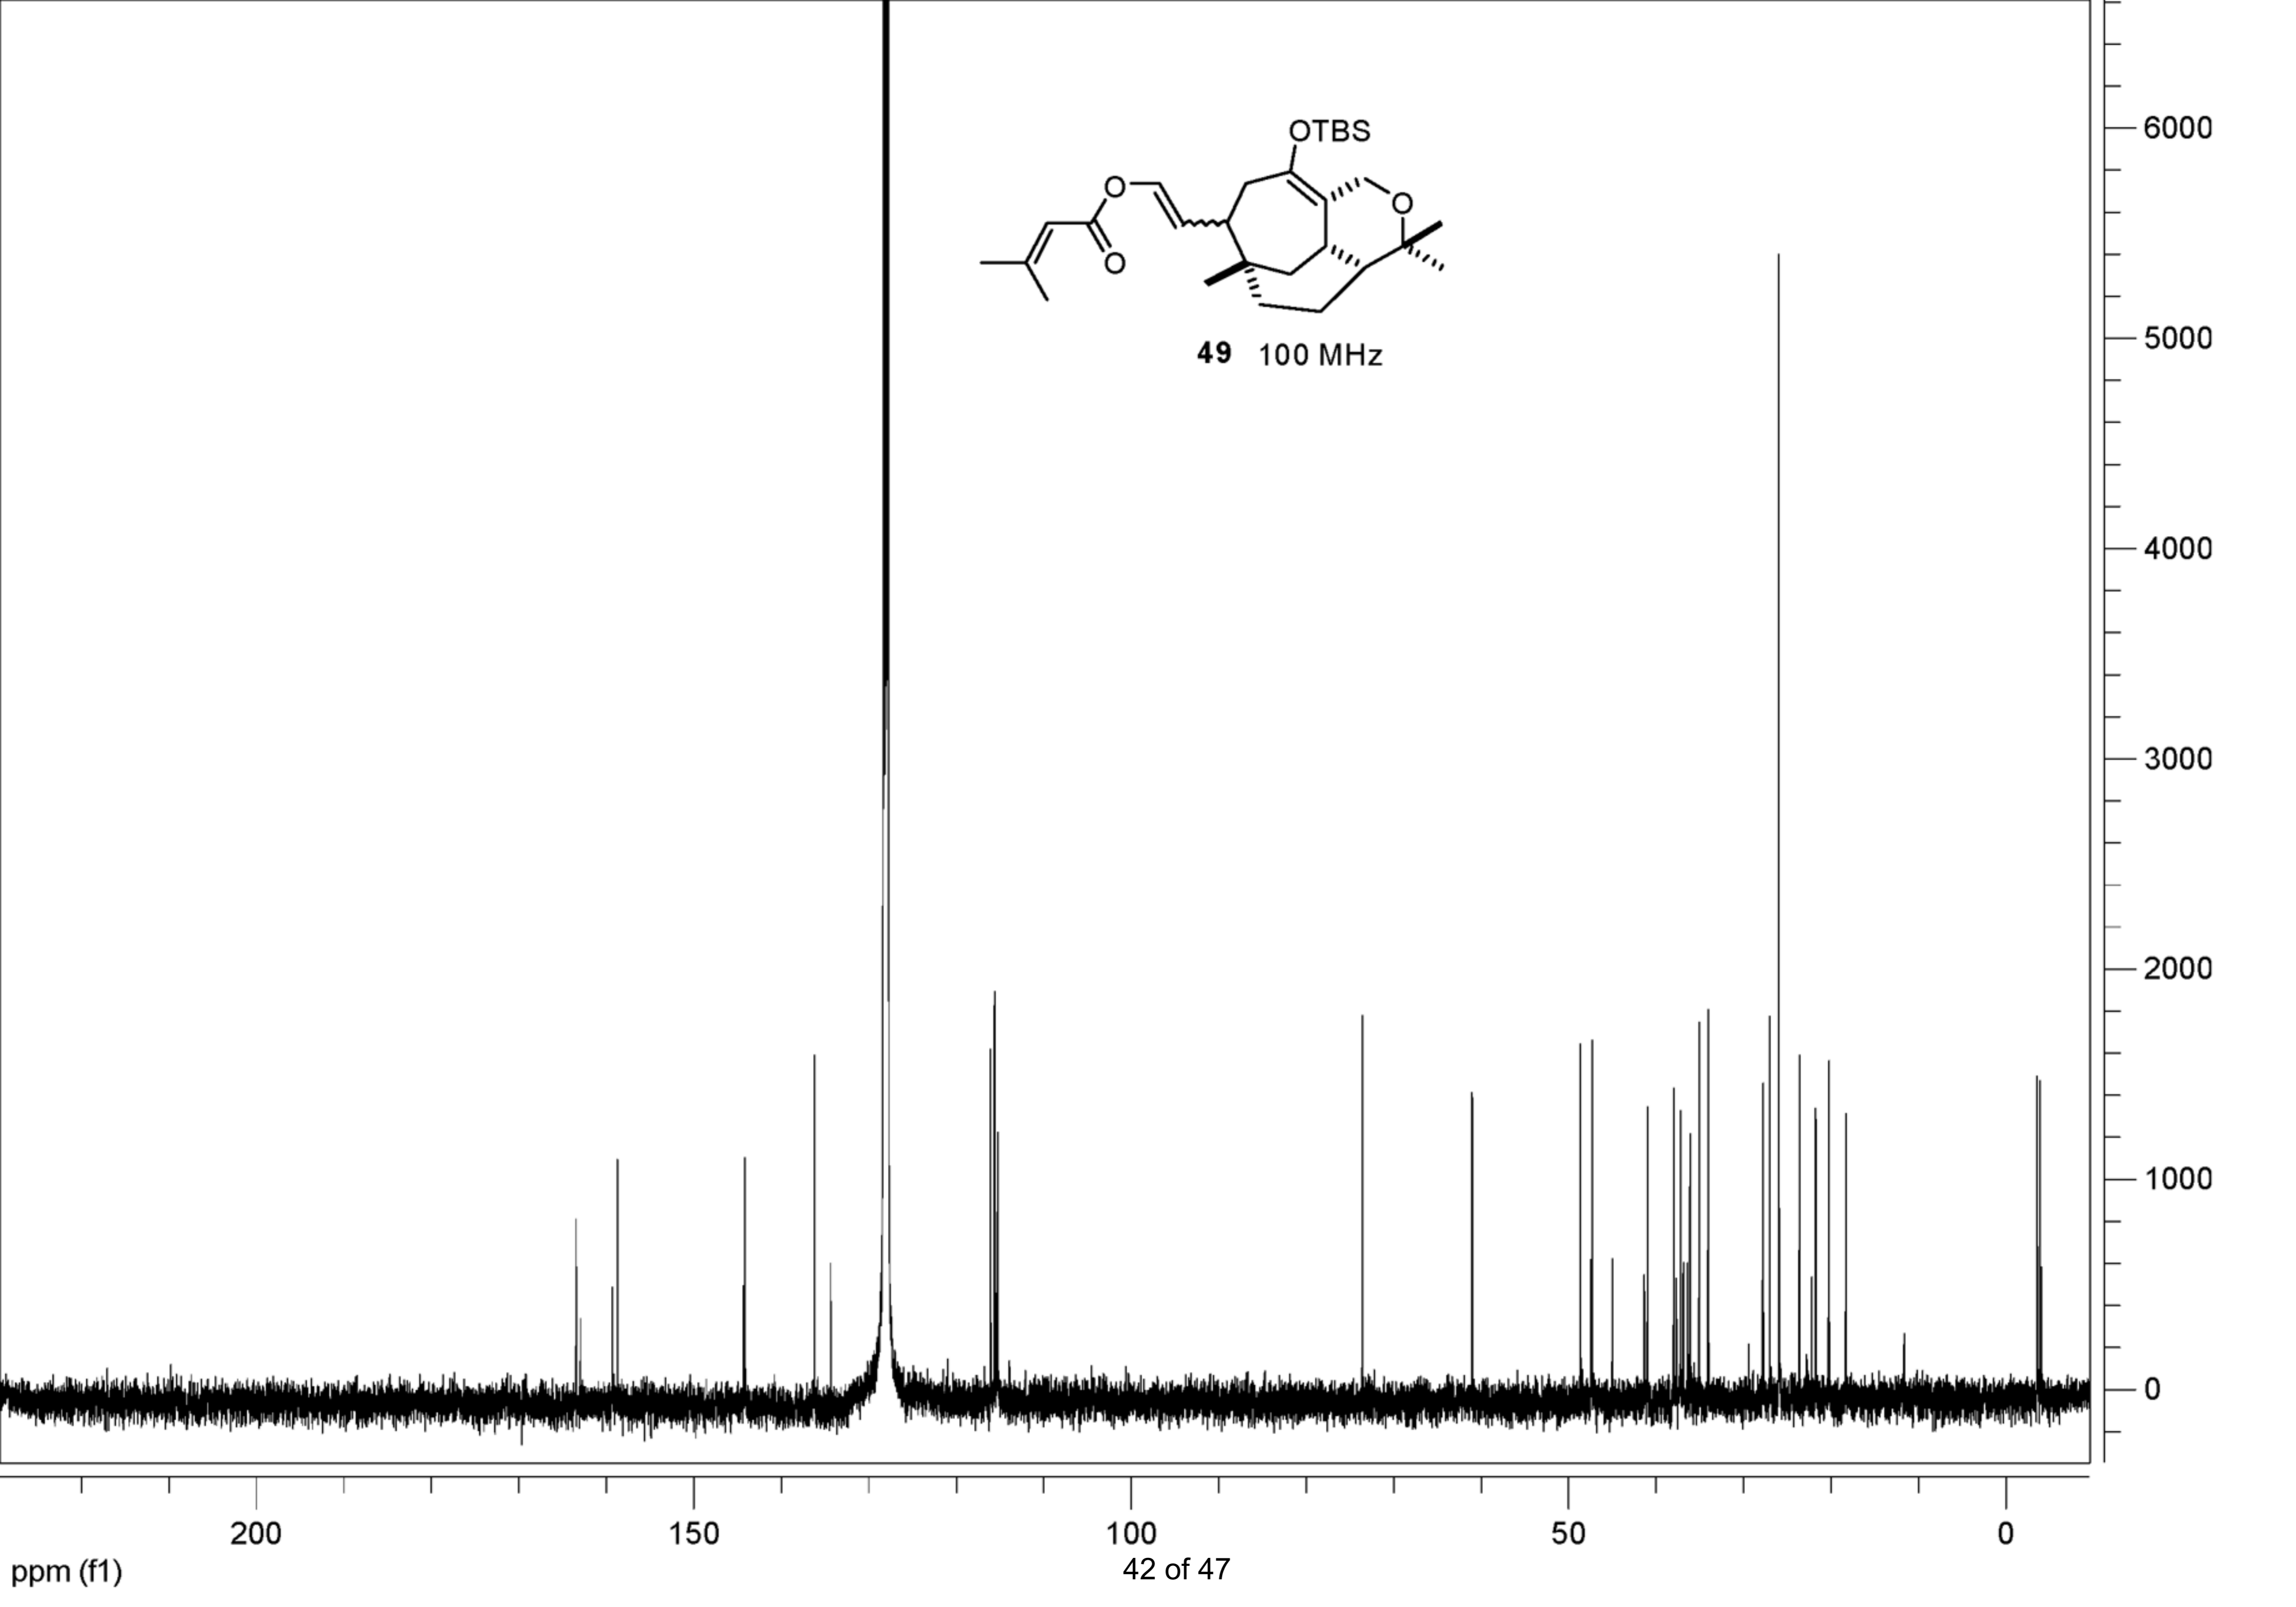

200

150

100

50

0

ppm (f1)

42 of 47

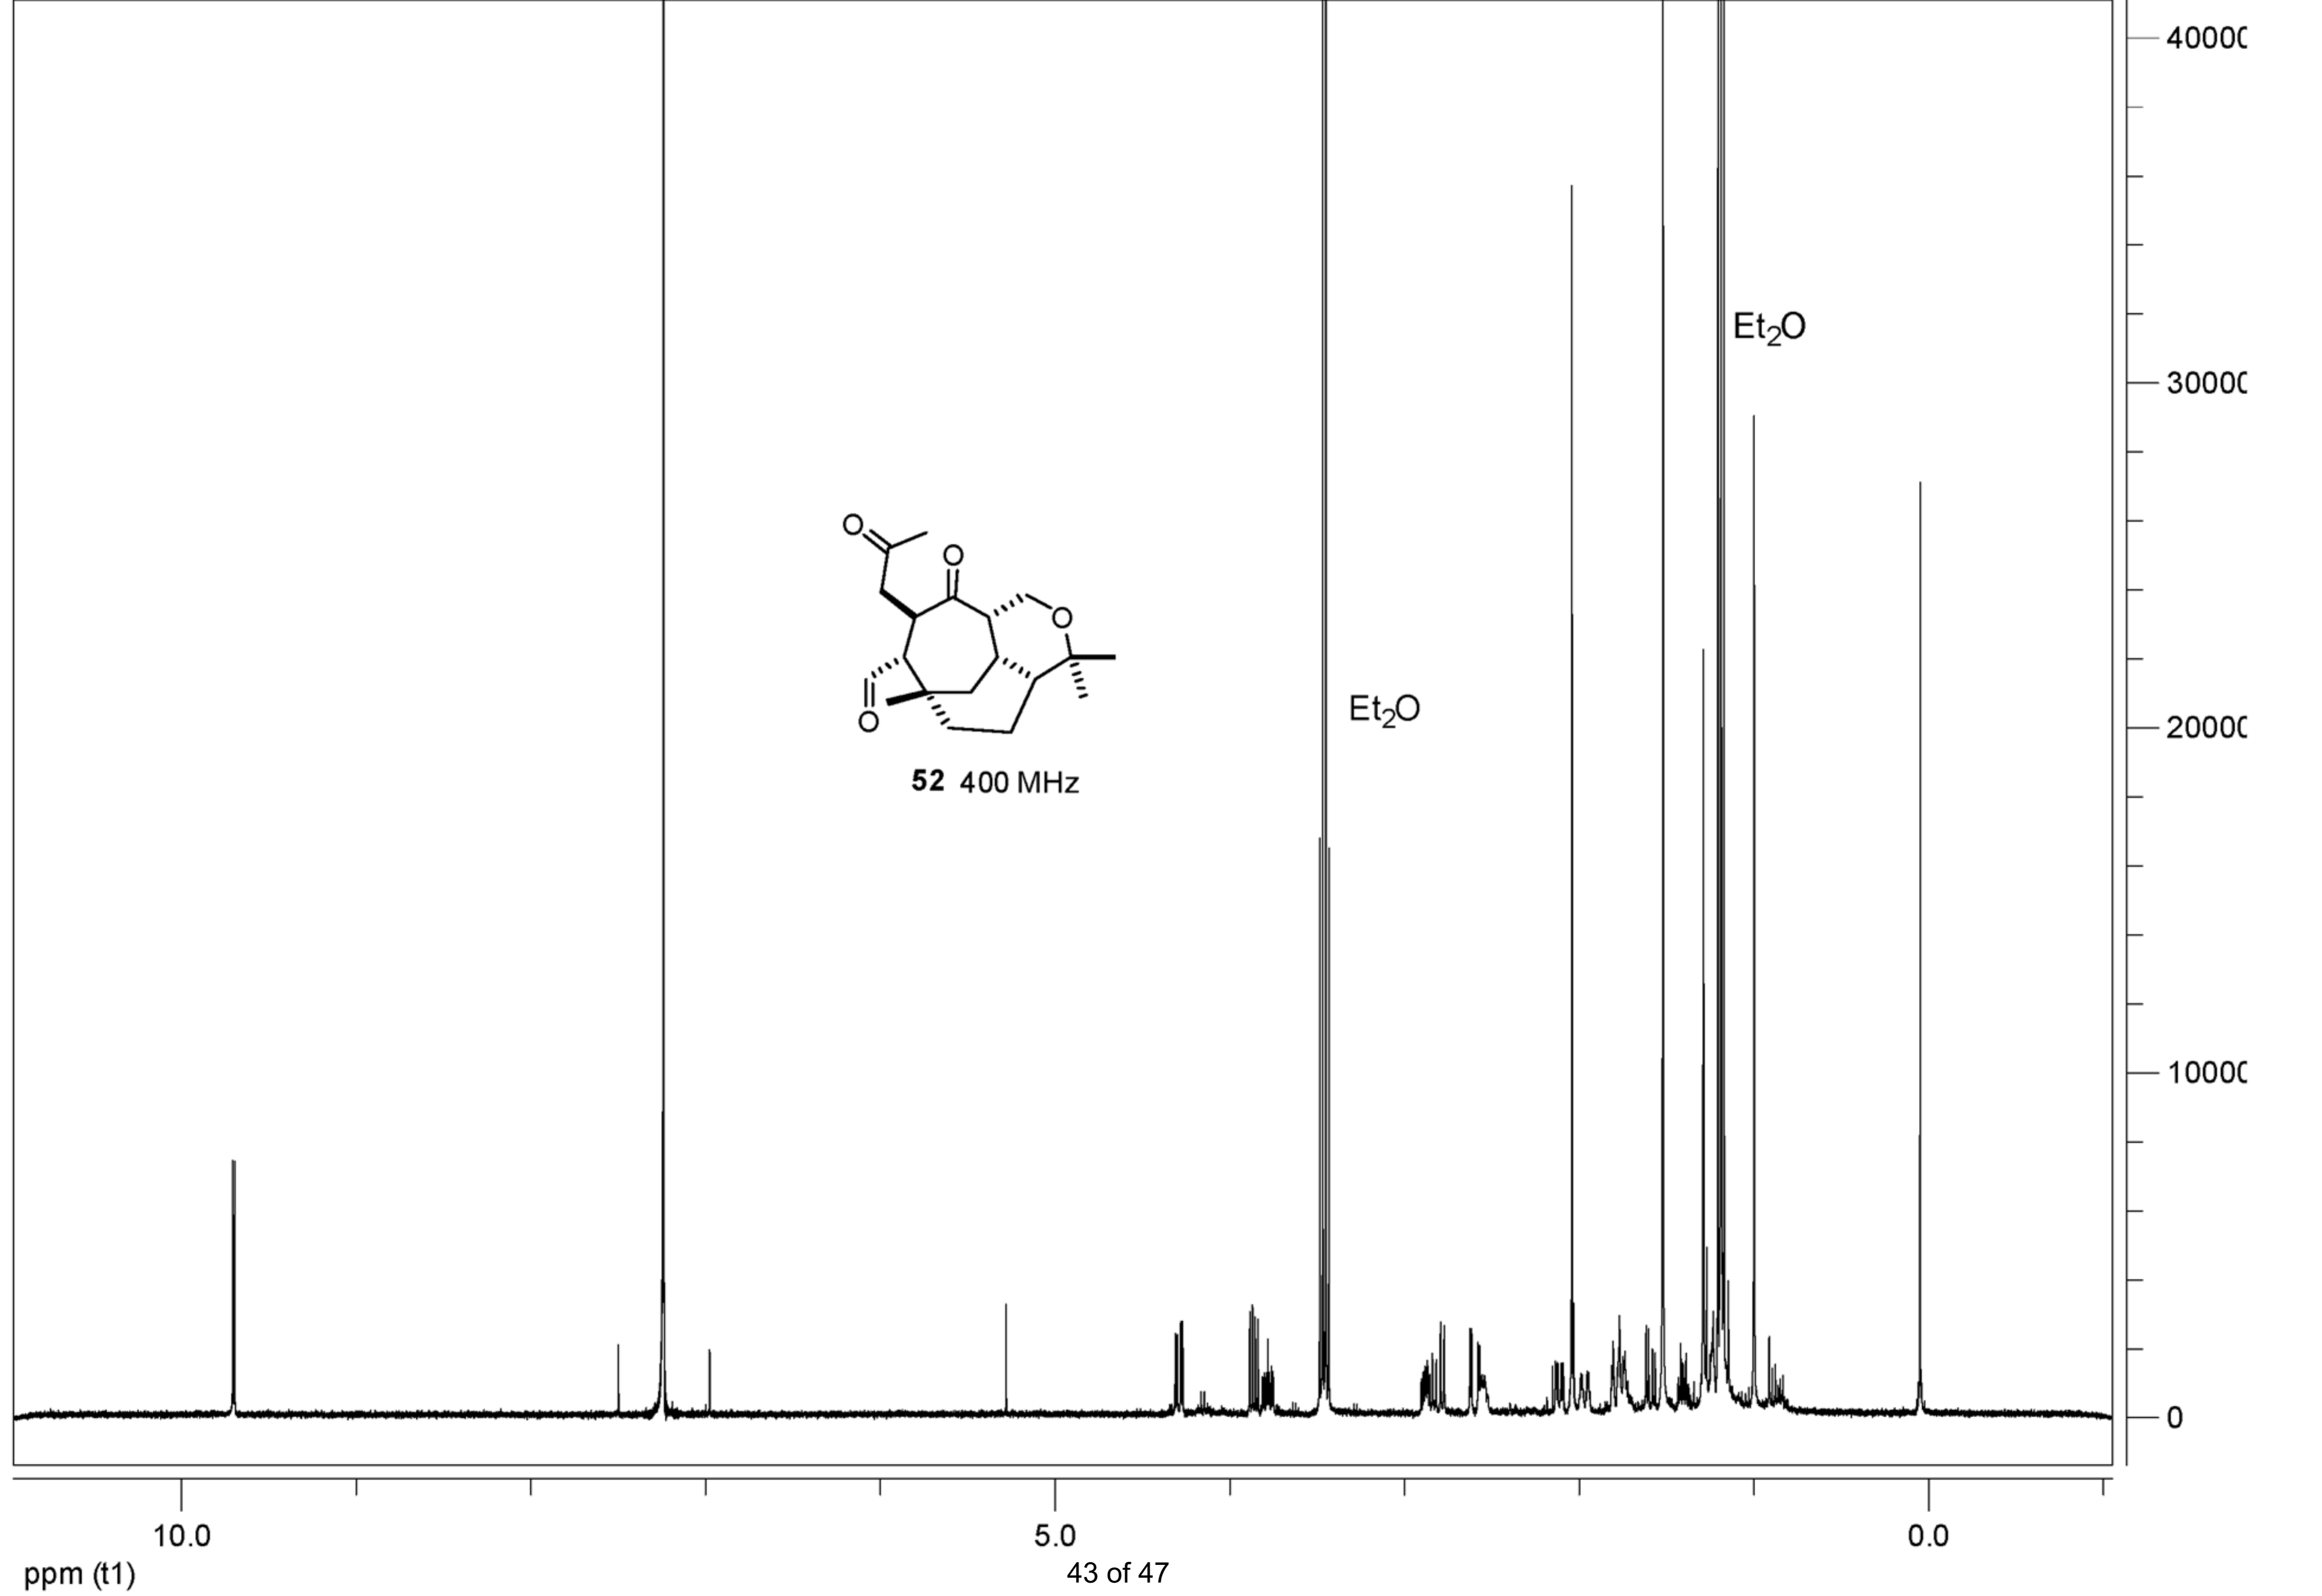

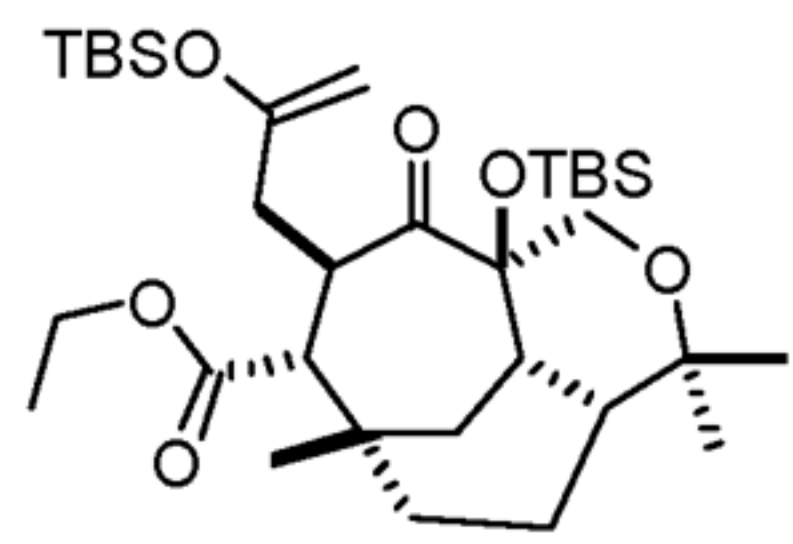

53 400 MHz

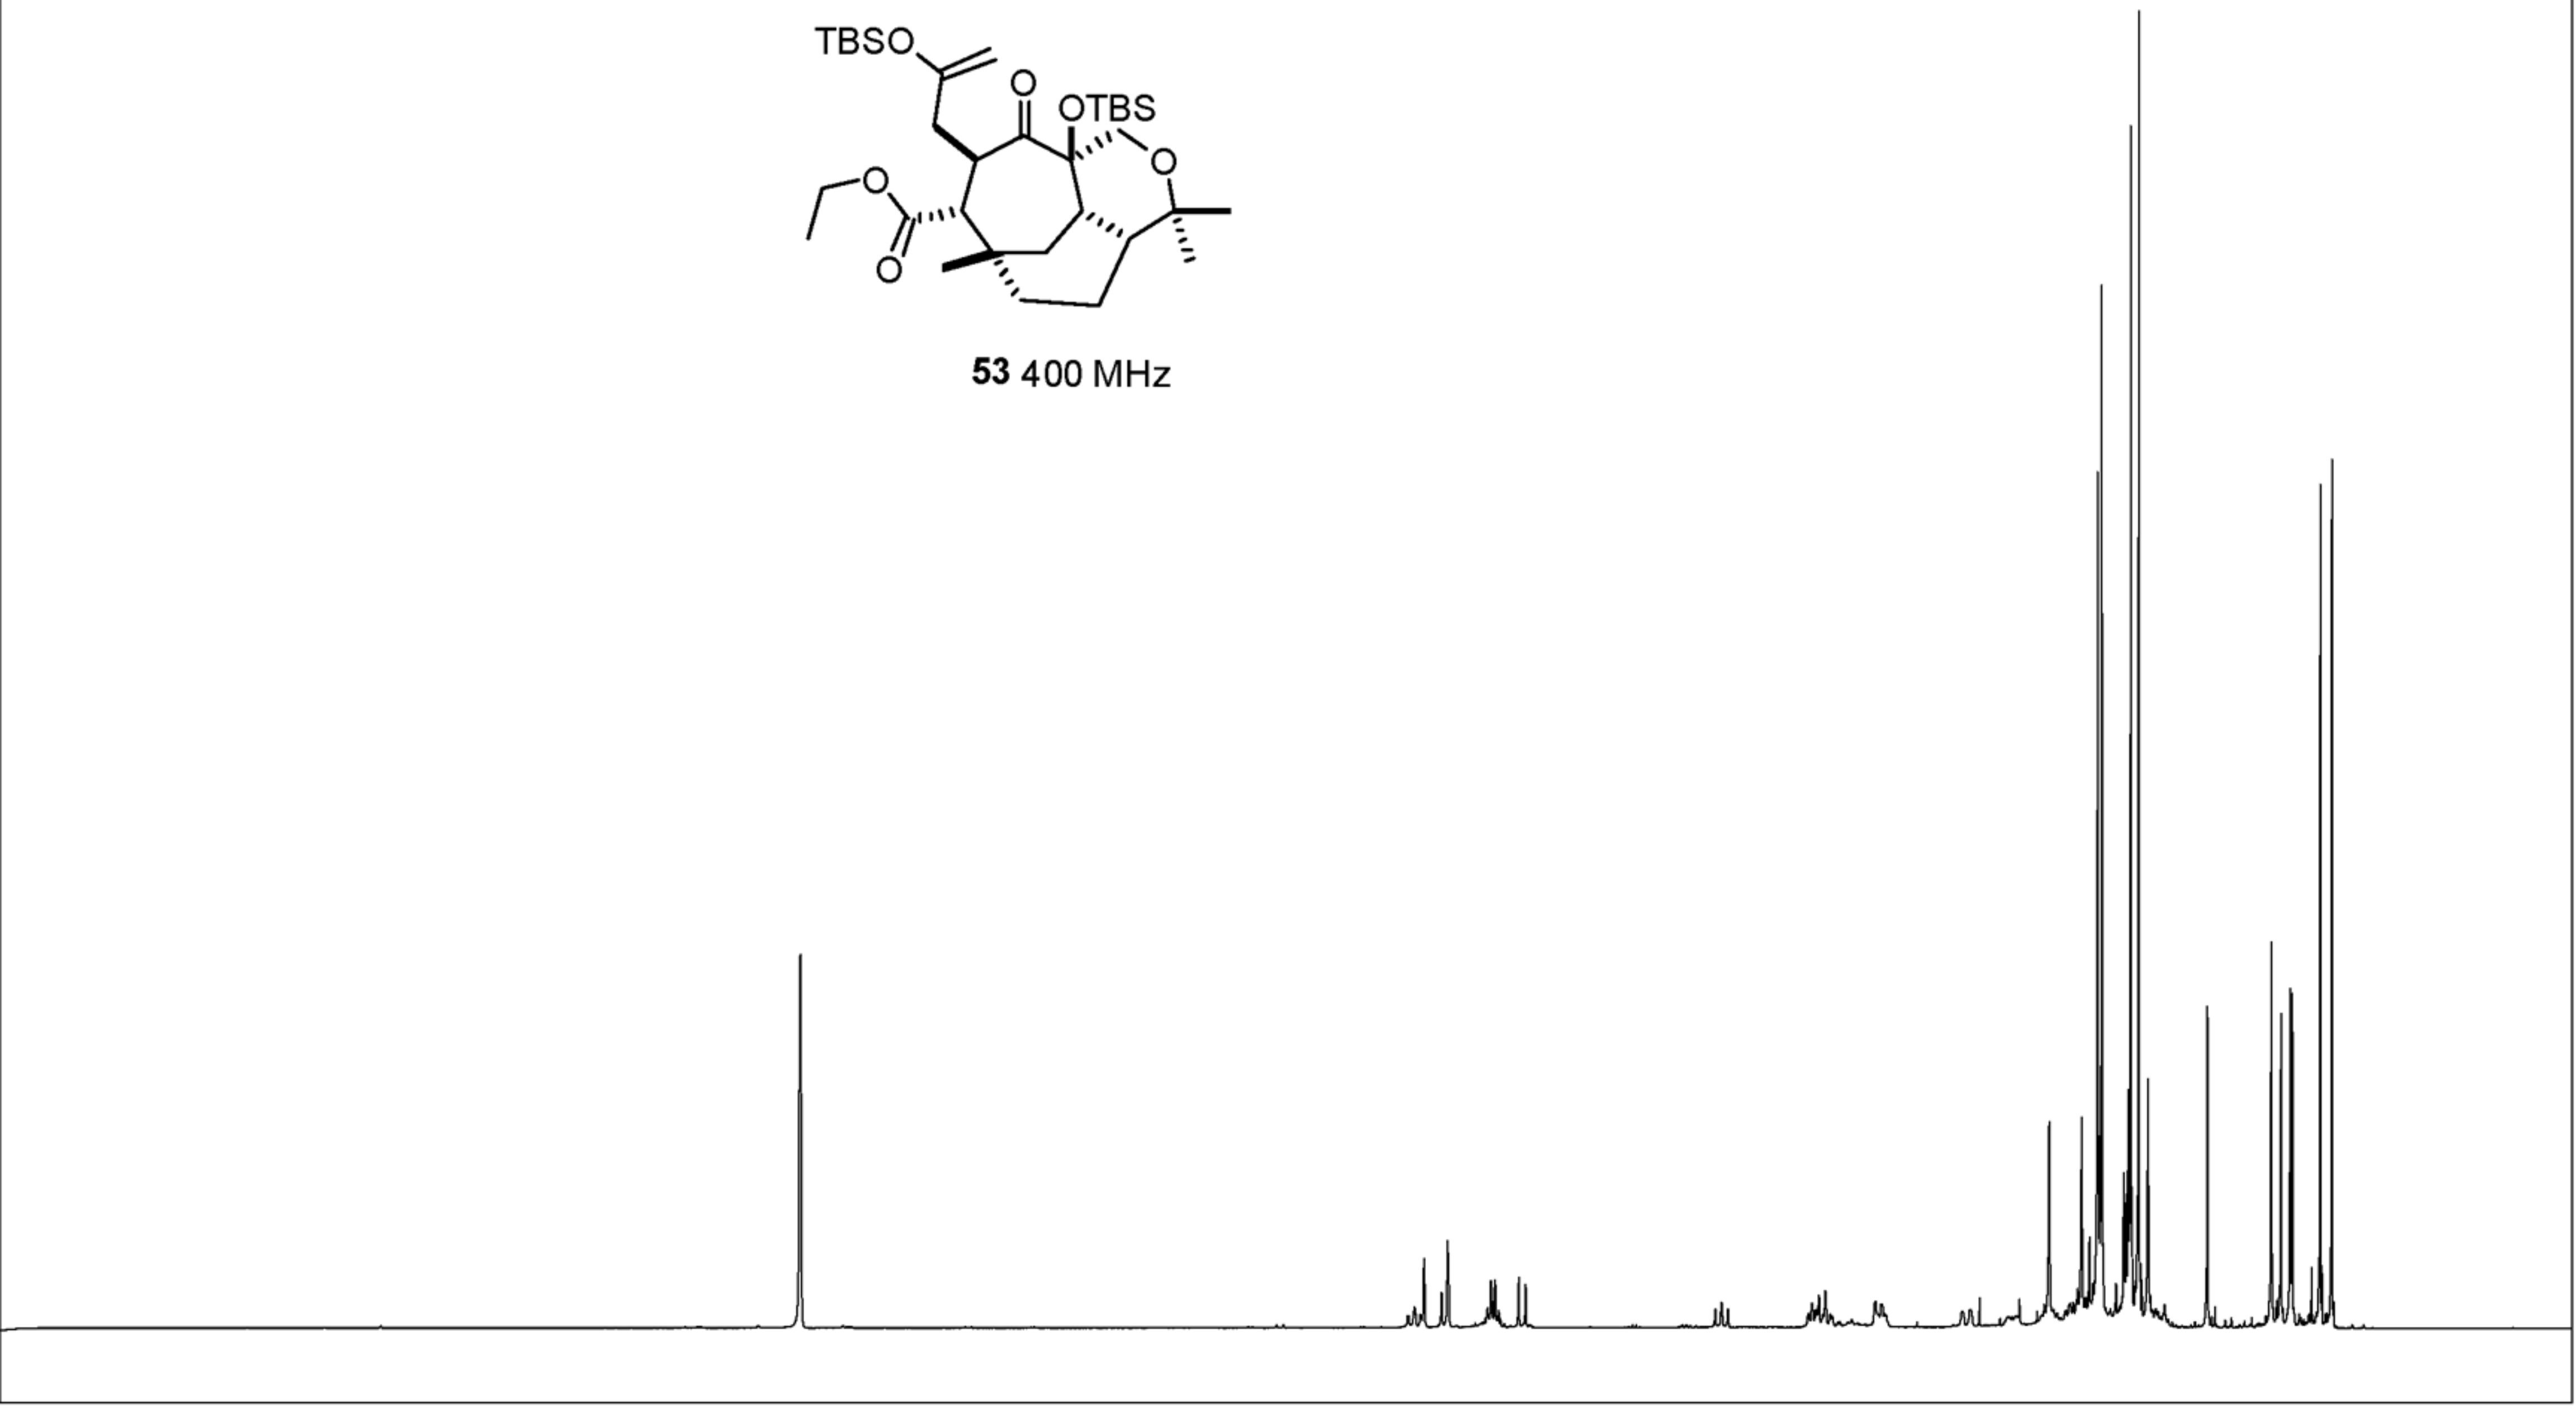

10.0  
ppm (f1)

5.0  
44 of 47

0.0

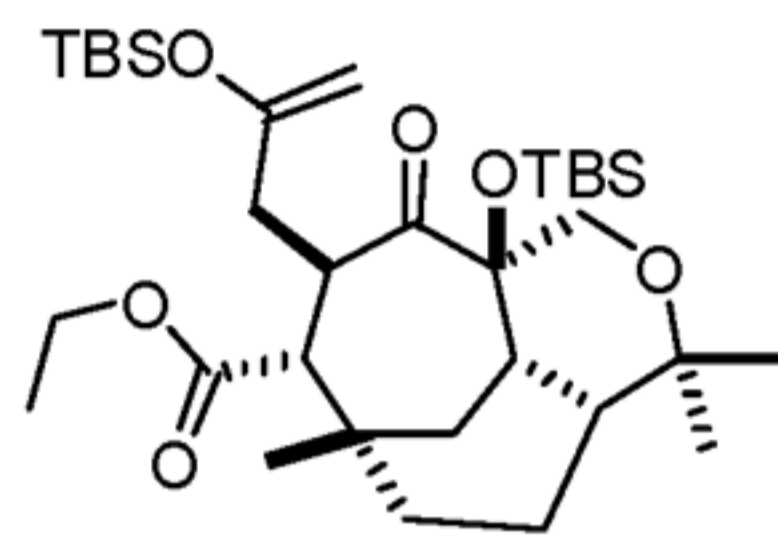

53 100 MHz

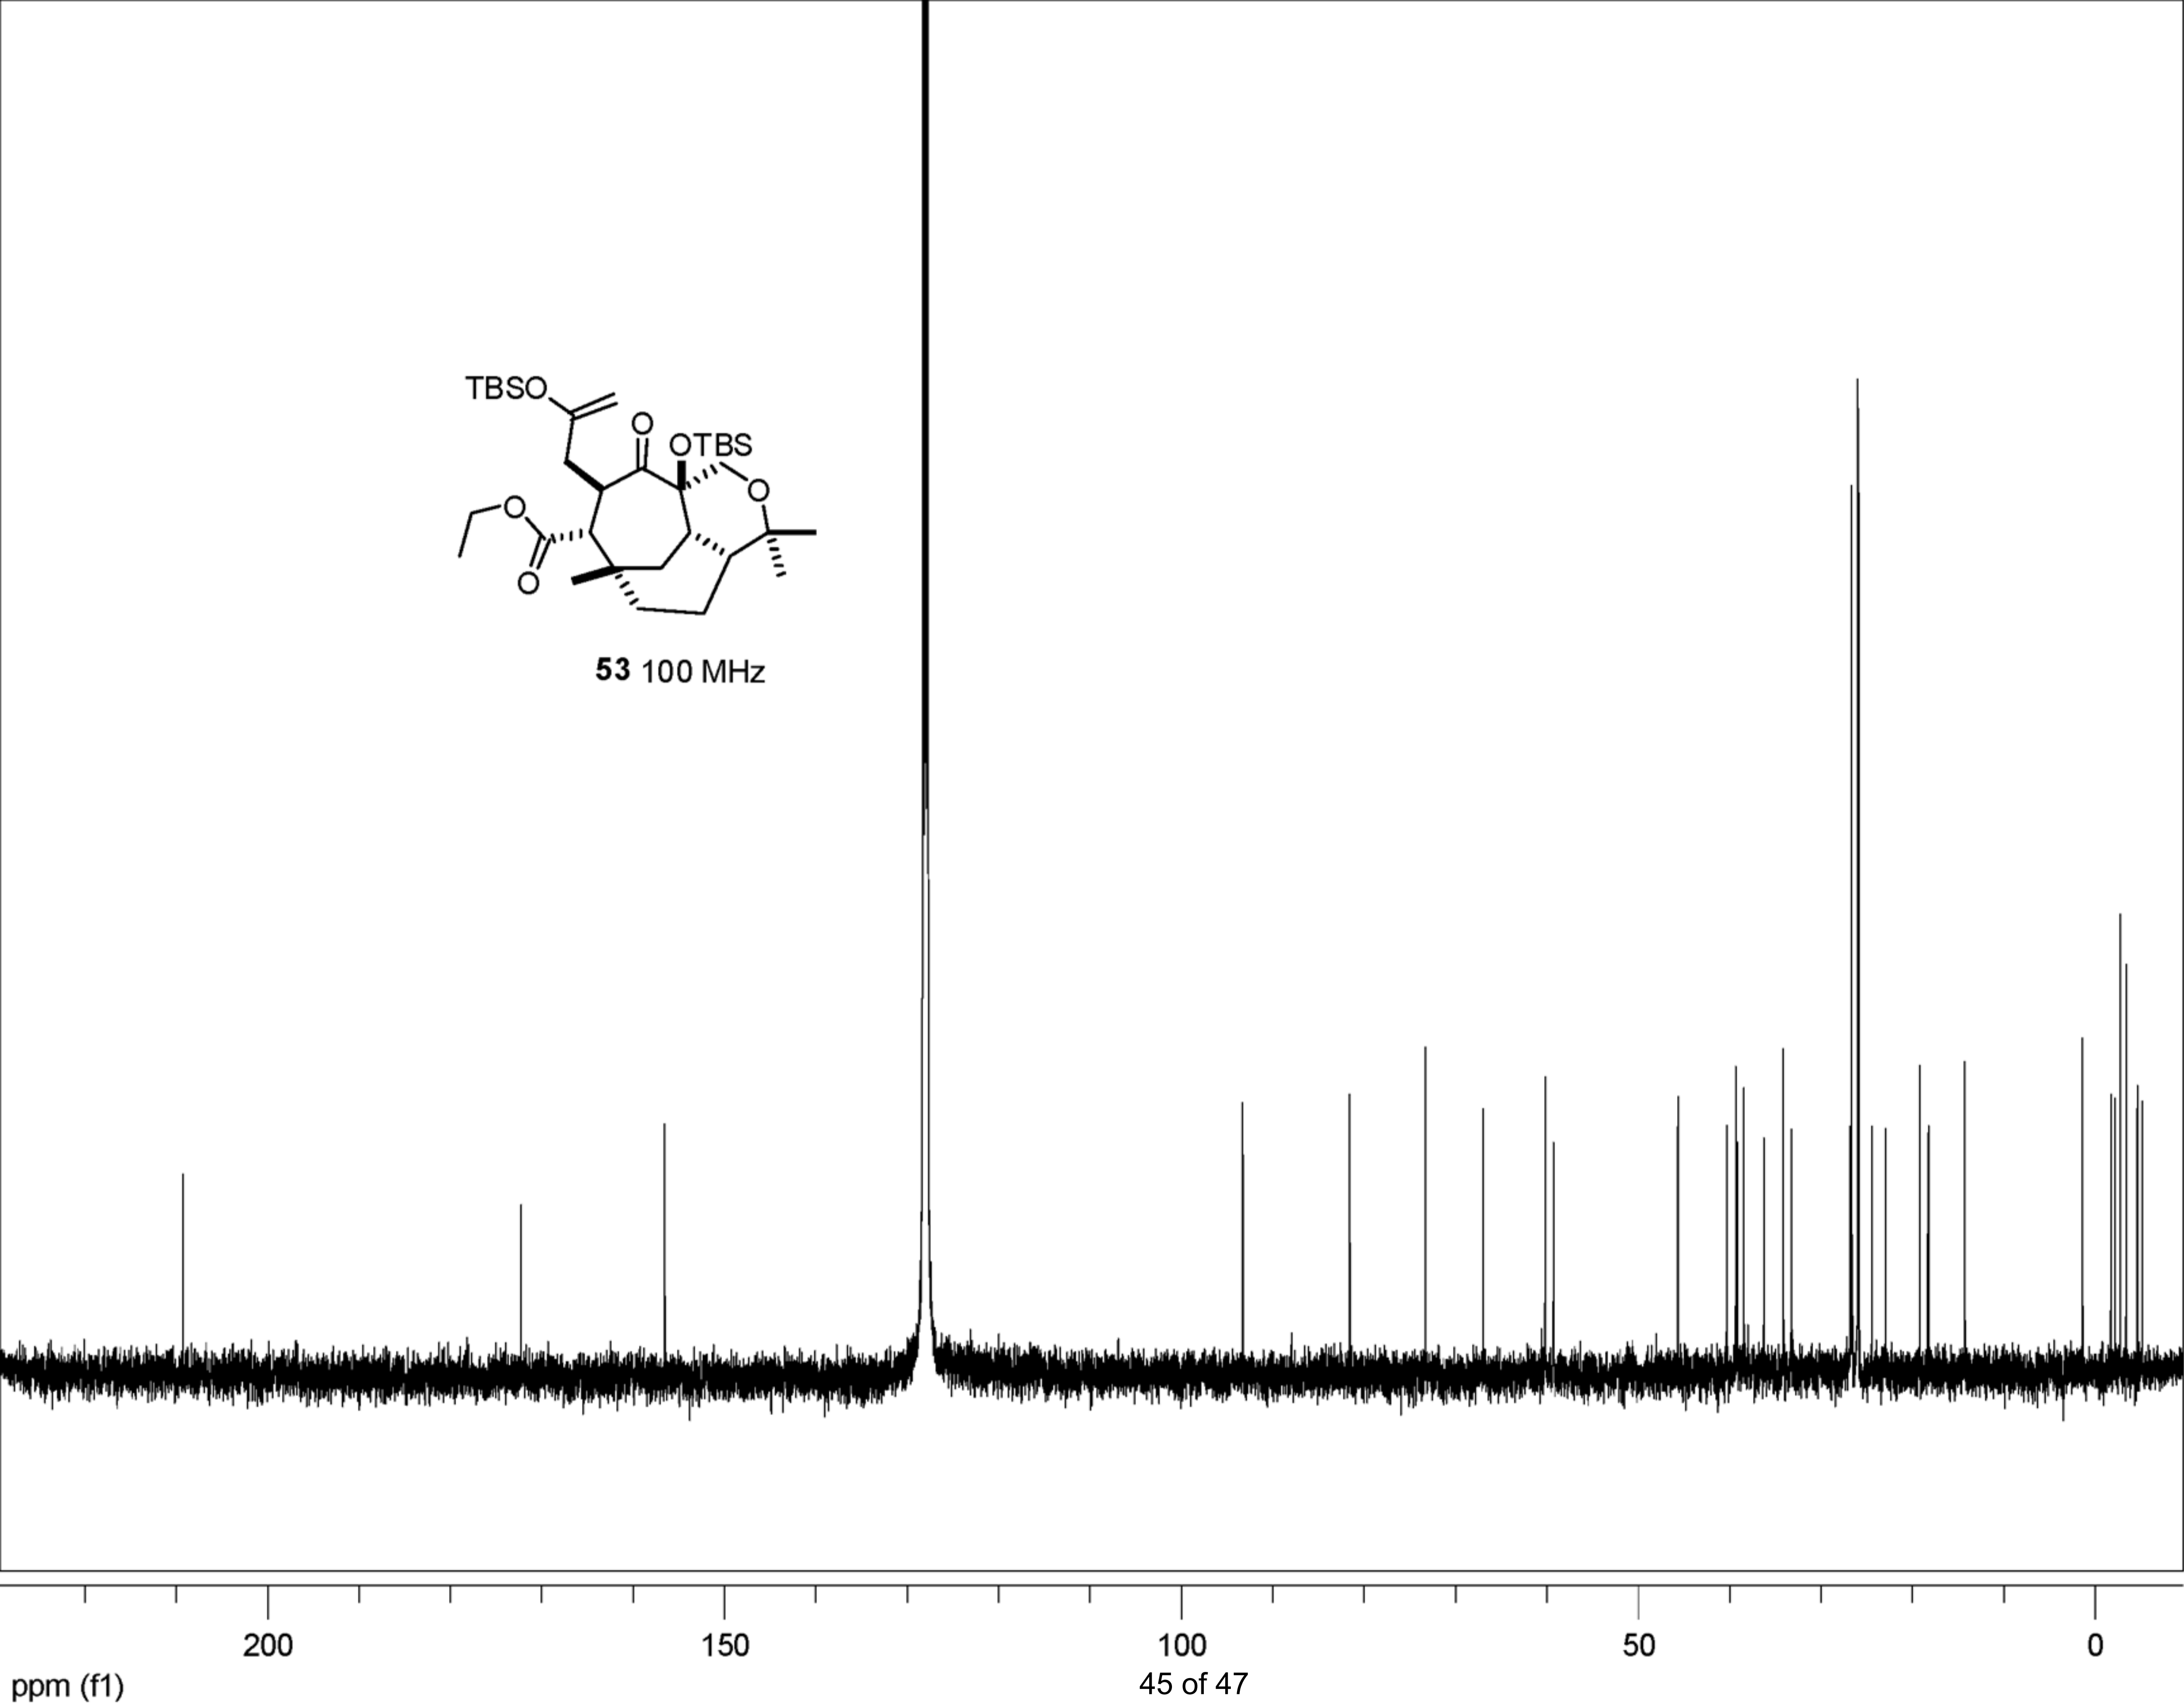

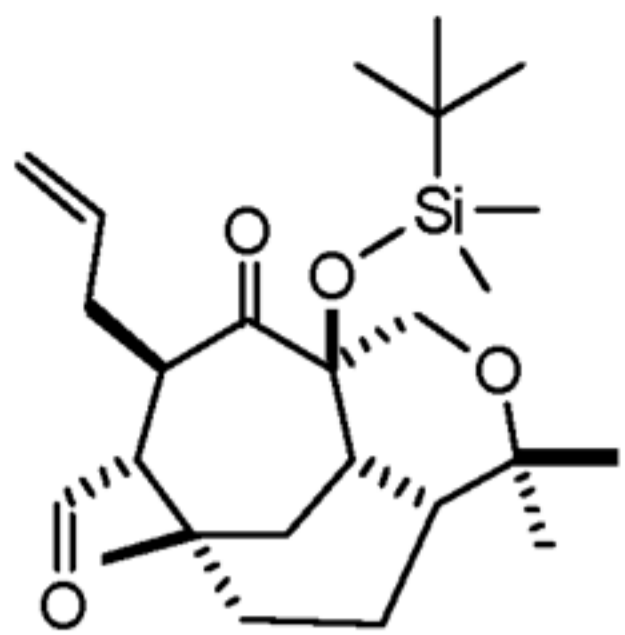

55 400 MHz

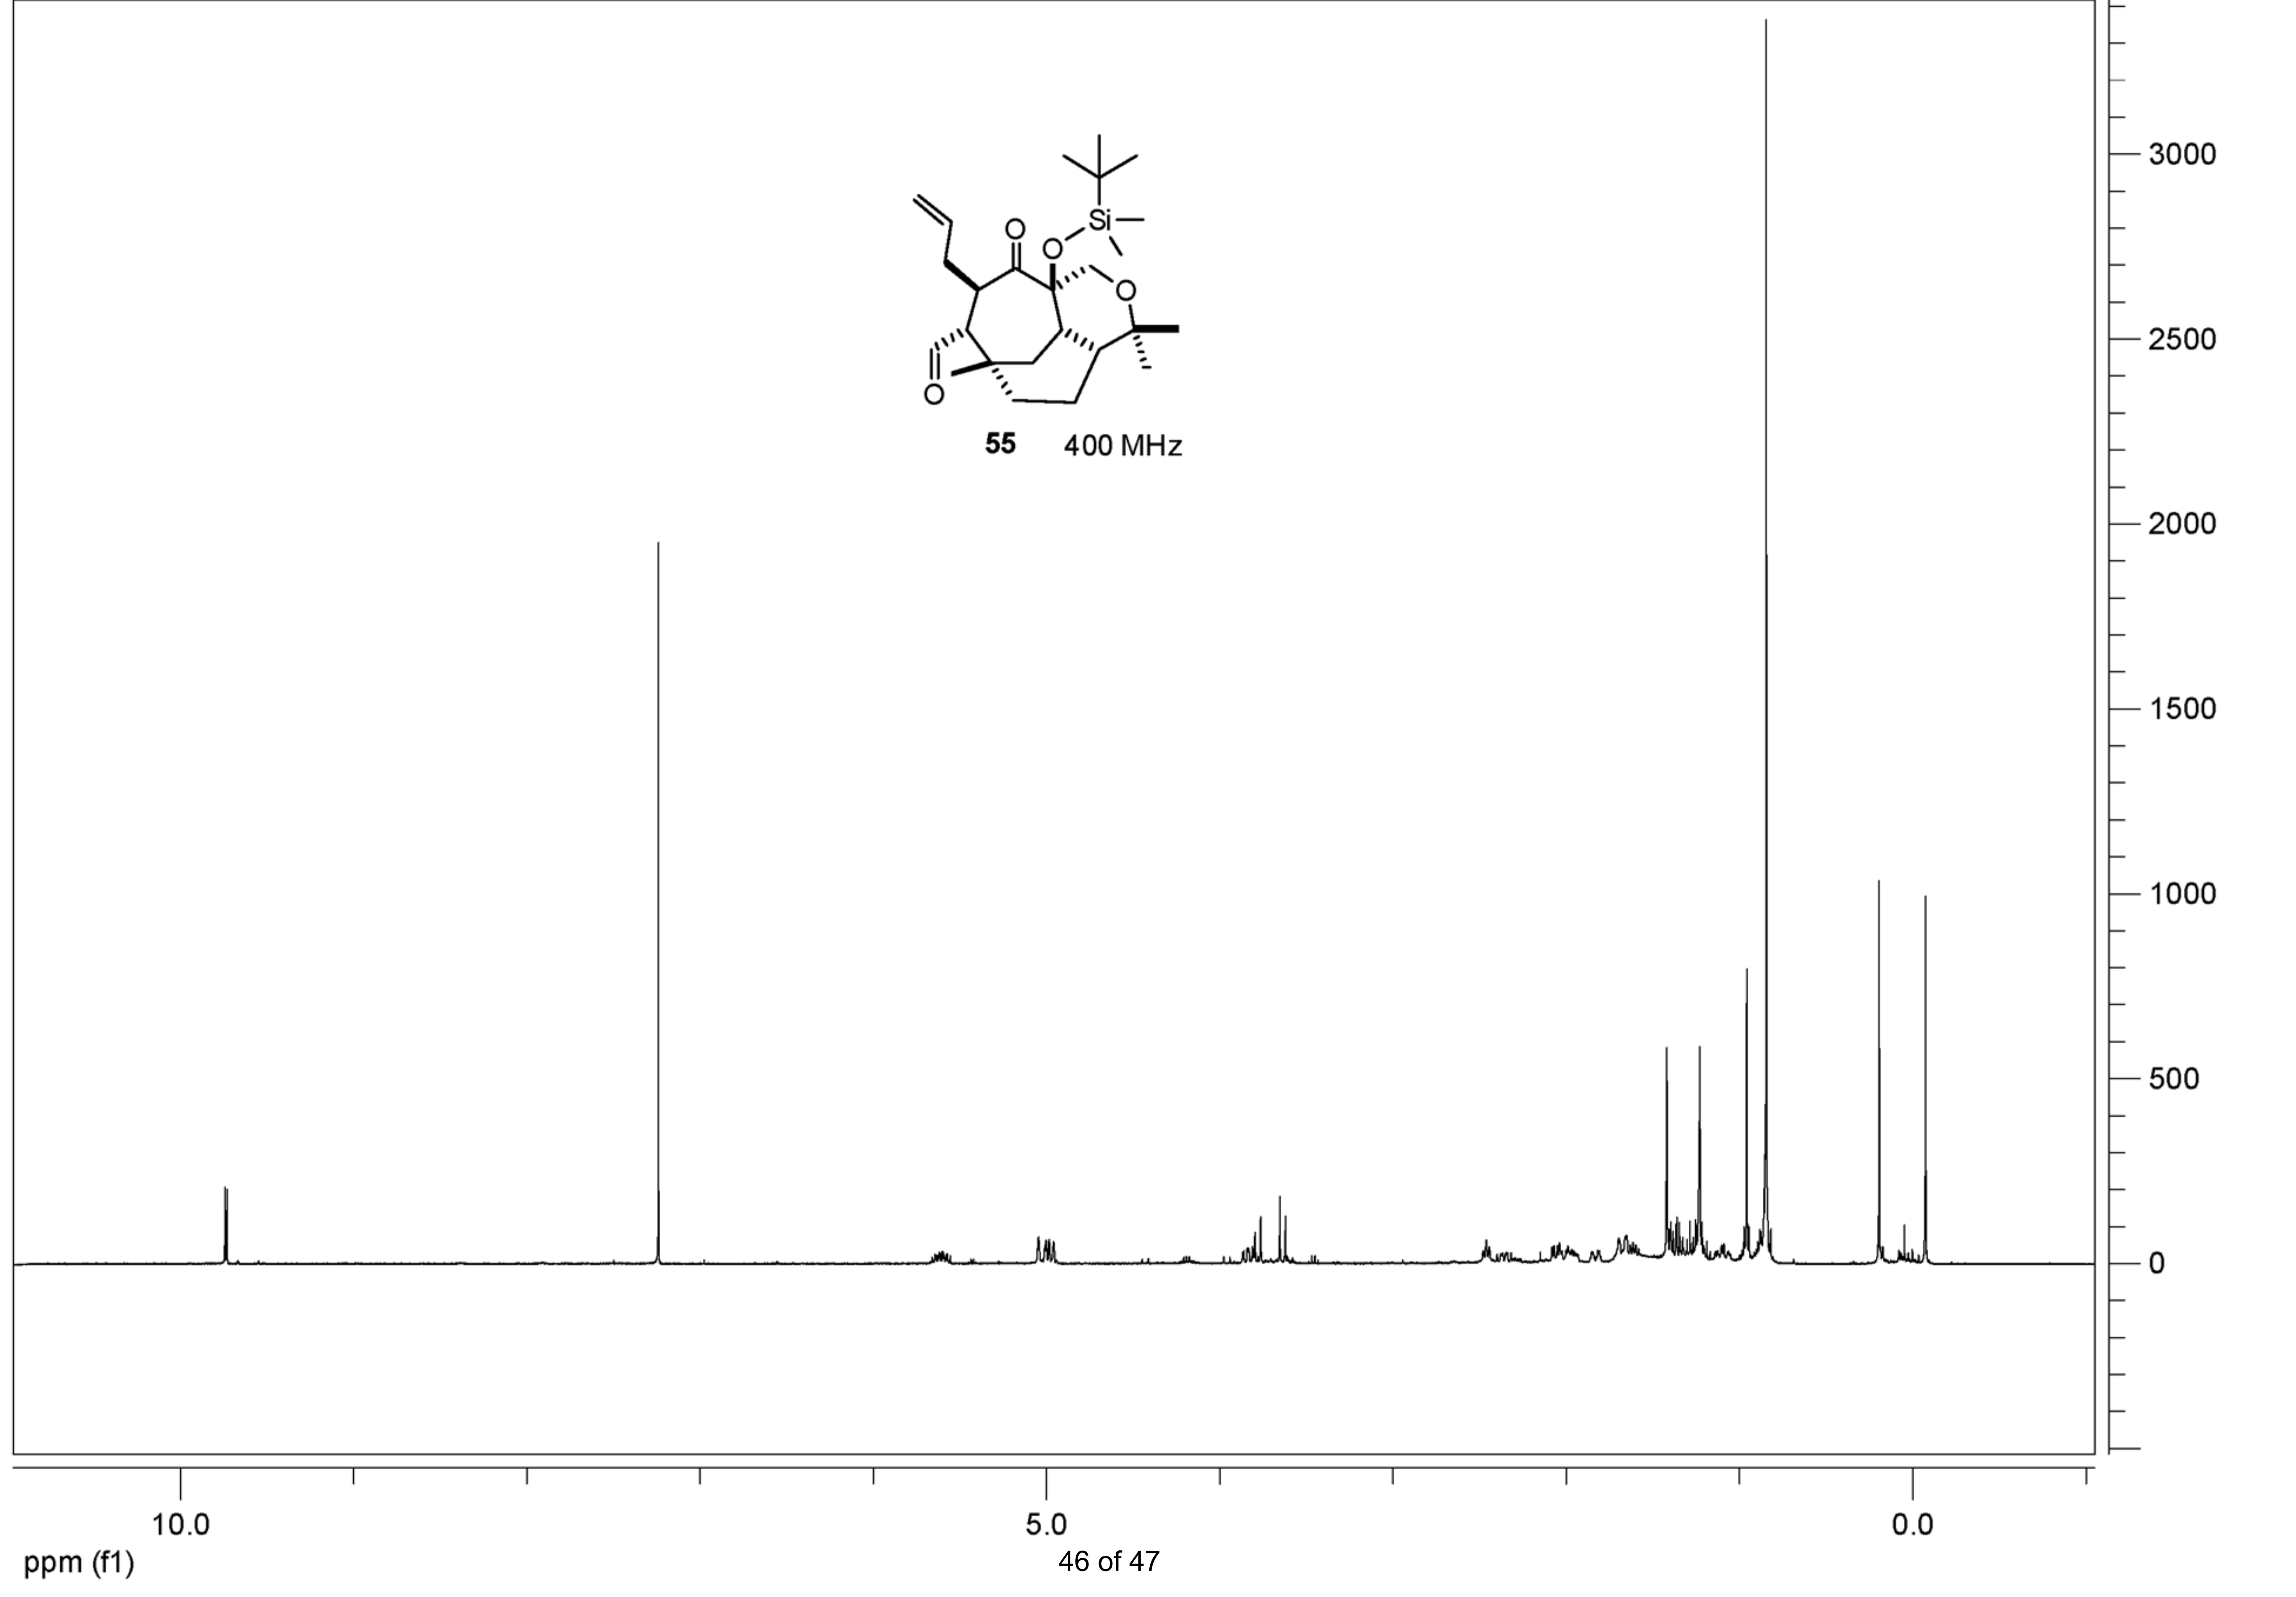

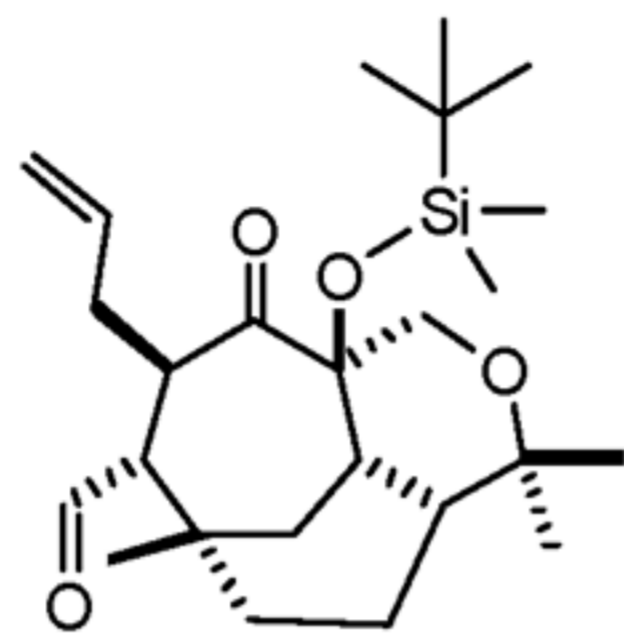

55 100 MHz

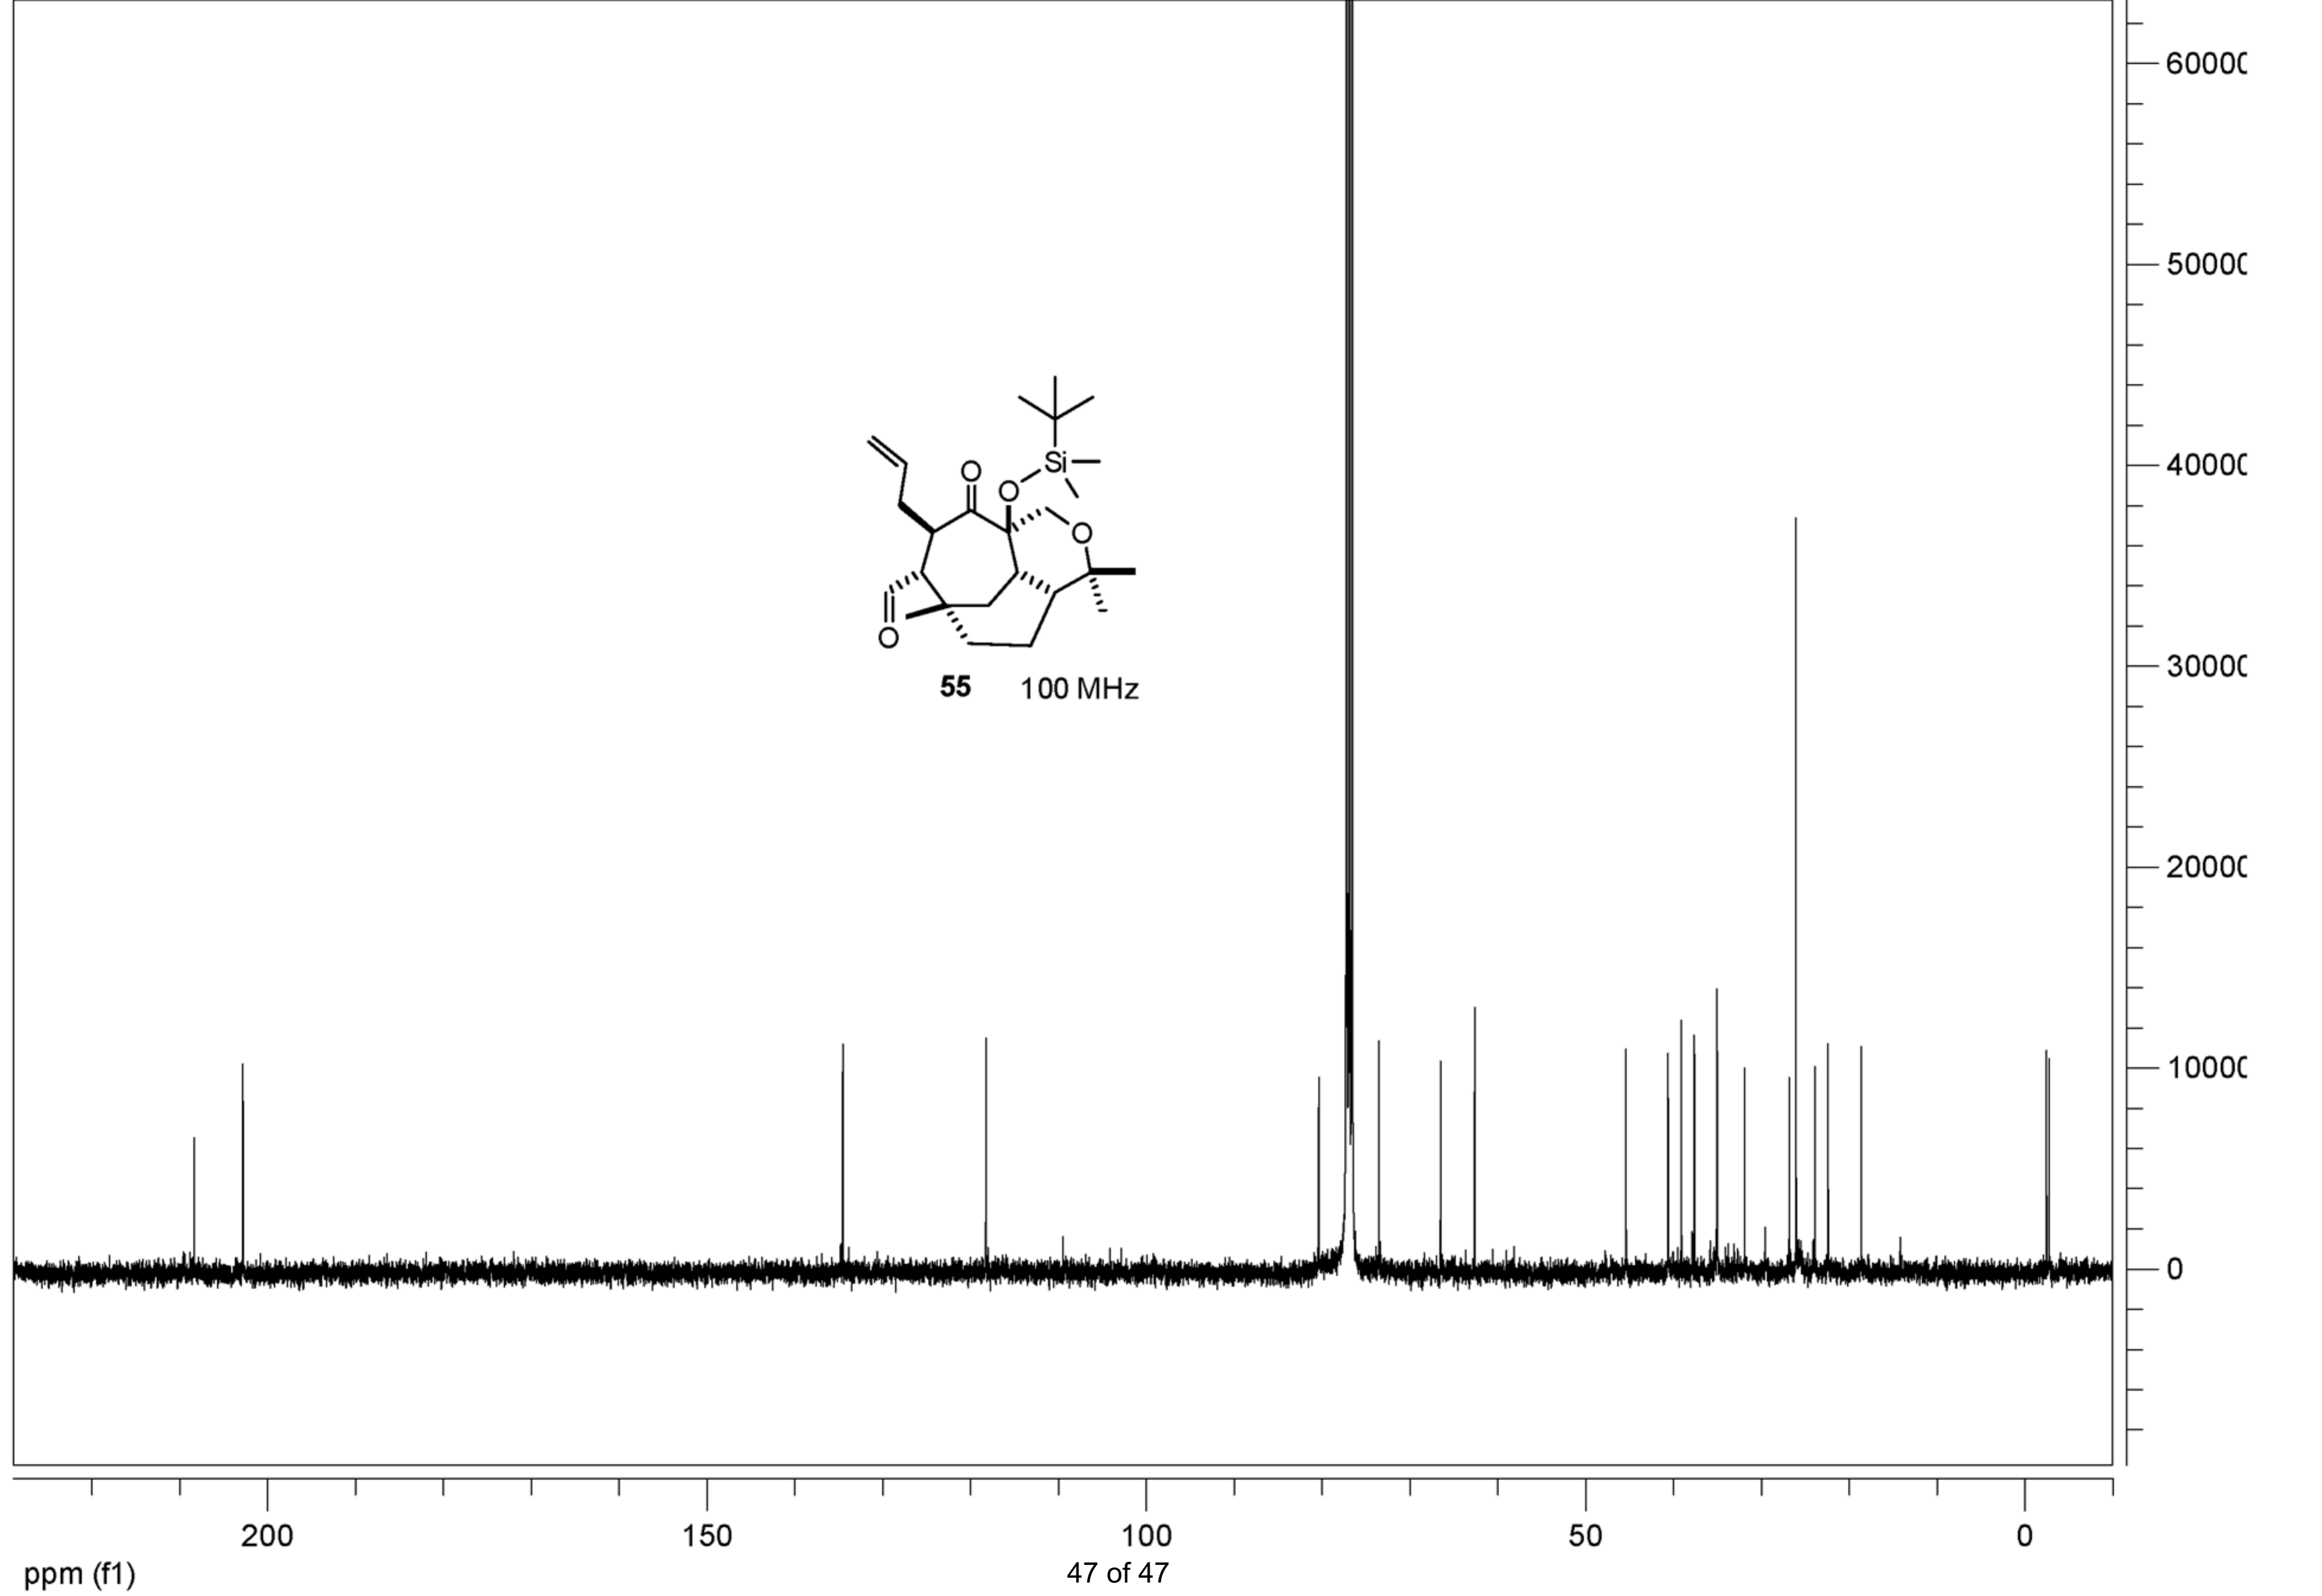

Supplement: Additional file 2 [file 1860-5397-4-34-S2.pdf]
